# Supplementary material for: The CCR4–NOT complex maintains liver homeostasis through mRNA deadenylation
Source: Life Sci Alliance. 2020 Apr 1;3(5):e201900494. doi: 10.26508/lsa.201900494 (PMC7119370; doi:10.26508/lsa.201900494)
Supplement: Supplementary file 3 [file LSA-2019-00494_TableS3.xlsx]

## Sheet: Sheet1
Table S3. CCR4-NOT RIP enrichment values. CCR4-NOT RIP enrichment values were calculated by normalizing Gene FPKMs in CCR4-NOT immunoprecipitates of liver lysates from control mice with Gene FPKMs in total liver lysates (input) (averages of three experiments). Ensemble gene IDs and gene symbols are also shown.
CCR4-NOT RIP enrichment values in livers from control mice
Ensembl ID	Gene Symbol	CCR4-NOT RIP enrichment value
ENSMUSG00000000001	Gnai3	0.797664
ENSMUSG00000000028	Cdc45	2.63084
ENSMUSG00000000049	Apoh	0.843781
ENSMUSG00000000056	Narf	1.33816
ENSMUSG00000000058	Cav2	0.665272
ENSMUSG00000000078	Klf6	5.09266
ENSMUSG00000000085	Scmh1	1.58878
ENSMUSG00000000088	Cox5a	0.441315
ENSMUSG00000000093	Tbx2	3.09247
ENSMUSG00000000120	Ngfr	2.89726
ENSMUSG00000000127	Fer	1.33563
ENSMUSG00000000131	Xpo6	1.91065
ENSMUSG00000000134	Tfe3	1.73099
ENSMUSG00000000142	Axin2	8.84671
ENSMUSG00000000148	Brat1	1.4823
ENSMUSG00000000149	Gna12	2.83333
ENSMUSG00000000154	Slc22a18	1.08577
ENSMUSG00000000159	Igsf5	0.700377
ENSMUSG00000000168	Dlat	0.731683
ENSMUSG00000000171	Sdhd	0.523433
ENSMUSG00000000184	Ccnd2	2.93108
ENSMUSG00000000194	Gpr107	1.51839
ENSMUSG00000000247	Lhx2	2.40337
ENSMUSG00000000253	Gmpr	1.78897
ENSMUSG00000000266	Mid2	2.00754
ENSMUSG00000000275	Trim25	1.62796
ENSMUSG00000000276	Dgke	2.74054
ENSMUSG00000000278	Scpep1	0.884484
ENSMUSG00000000282	Mnt	4.28356
ENSMUSG00000000290	Itgb2	1.09274
ENSMUSG00000000295	Hddc2	0.809363
ENSMUSG00000000296	Tpd52l1	0.554142
ENSMUSG00000000301	Pemt	0.608062
ENSMUSG00000000303	Cdh1	1.74418
ENSMUSG00000000317	Bcl6b	2.01649
ENSMUSG00000000318	Clec10a	1.72952
ENSMUSG00000000325	Arvcf	1.08655
ENSMUSG00000000326	Comt	0.707698
ENSMUSG00000000339	Rtca	0.921529
ENSMUSG00000000340	Dbt	0.669354
ENSMUSG00000000346	Dazap2	0.609444
ENSMUSG00000000355	Mcts1	0.600583
ENSMUSG00000000374	Trappc10	3.26568
ENSMUSG00000000378	Ccm2	1.04139
ENSMUSG00000000384	Tbrg4	1.45789
ENSMUSG00000000385	Tmprss2	1.54375
ENSMUSG00000000386	Mx1	1.6981
ENSMUSG00000000399	Ndufa9	0.785853
ENSMUSG00000000409	Lck	1.78578
ENSMUSG00000000420	Galnt1	1.09302
ENSMUSG00000000439	Mkrn2	1.73594
ENSMUSG00000000440	Pparg	2.48182
ENSMUSG00000000441	Raf1	0.872566
ENSMUSG00000000486	43344	1.32384
ENSMUSG00000000489	Pdgfb	3.55914
ENSMUSG00000000530	Acvrl1	1.7764
ENSMUSG00000000531	Grasp	3.97451
ENSMUSG00000000532	Acvr1b	3.11501
ENSMUSG00000000538	Tom1l2	2.40959
ENSMUSG00000000552	Zfp385a	1.05491
ENSMUSG00000000555	Itga5	2.36529
ENSMUSG00000000560	Gabra2	10.7591
ENSMUSG00000000561	Wdr77	0.630813
ENSMUSG00000000563	Atp5f1	0.562567
ENSMUSG00000000567	Sox9	5.48484
ENSMUSG00000000568	Hnrnpd	1.29986
ENSMUSG00000000579	Dynlt1c	1.40936
ENSMUSG00000000581	C1d	0.52773
ENSMUSG00000000594	Gm2a	0.658343
ENSMUSG00000000600	Krit1	2.20713
ENSMUSG00000000605	Clcn4-2	1.31552
ENSMUSG00000000628	Hk2	2.82363
ENSMUSG00000000631	Myo18a	3.59368
ENSMUSG00000000673	Haao	0.949494
ENSMUSG00000000682	Cd52	0.547495
ENSMUSG00000000686	Abhd15	1.01527
ENSMUSG00000000693	Loxl3	1.56495
ENSMUSG00000000708	Kat2b	1.0379
ENSMUSG00000000711	Rab5b	0.810698
ENSMUSG00000000738	Spg7	1.57507
ENSMUSG00000000739	Sult5a1	2.54056
ENSMUSG00000000740	Rpl13	0.769318
ENSMUSG00000000743	Chmp1a	1.16449
ENSMUSG00000000751	Rpa1	1.24566
ENSMUSG00000000753	Serpinf1	1.12848
ENSMUSG00000000759	Tubgcp3	1.39982
ENSMUSG00000000776	Polr3d	1.8331
ENSMUSG00000000782	Tcf7	2.21425
ENSMUSG00000000787	Ddx3x	1.32588
ENSMUSG00000000791	Il12rb1	1.42423
ENSMUSG00000000804	Usp32	1.79504
ENSMUSG00000000811	Txnrd3	1.90069
ENSMUSG00000000823	Znf512b	2.15616
ENSMUSG00000000826	Dnajc5	1.8551
ENSMUSG00000000827	Tpd52l2	0.823021
ENSMUSG00000000838	Fmr1	1.12746
ENSMUSG00000000876	Pxmp4	1.18159
ENSMUSG00000000881	Dlg3	1.65958
ENSMUSG00000000884	Gnb1l	0.943546
ENSMUSG00000000902	Smarcb1	1.3865
ENSMUSG00000000915	Hip1r	2.64739
ENSMUSG00000000916	Nsun5	1.35095
ENSMUSG00000000934	Top1mt	1.13394
ENSMUSG00000000948	Gm38393	0.887445
ENSMUSG00000000957	Mmp14	1.99981
ENSMUSG00000000958	Slc7a7	1.05262
ENSMUSG00000000959	Oxa1l	1.32194
ENSMUSG00000000976	Heatr6	1.83137
ENSMUSG00000001016	Ilf2	1.88041
ENSMUSG00000001017	Chtop	1.24641
ENSMUSG00000001018	Snapin	0.787237
ENSMUSG00000001025	S100a6	0.965489
ENSMUSG00000001029	Icam2	0.893524
ENSMUSG00000001034	Mapk7	3.94331
ENSMUSG00000001036	Epn2	2.40253
ENSMUSG00000001052	Sec24b	2.91186
ENSMUSG00000001053	N4bp3	1.80515
ENSMUSG00000001054	Rmnd5b	1.61185
ENSMUSG00000001056	Nhp2	0.714019
ENSMUSG00000001062	Vps9d1	1.92811
ENSMUSG00000001065	Zfp276	2.79008
ENSMUSG00000001082	Mfsd10	2.71652
ENSMUSG00000001089	Luzp1	4.00006
ENSMUSG00000001095	Slc13a2	1.10288
ENSMUSG00000001098	Kctd10	2.34795
ENSMUSG00000001100	Poldip2	0.944154
ENSMUSG00000001105	Ift20	0.564598
ENSMUSG00000001119	Col6a1	1.60022
ENSMUSG00000001120	Pcbp3	2.18492
ENSMUSG00000001123	Lgals9	0.650284
ENSMUSG00000001127	Araf	1.36775
ENSMUSG00000001128	Cfp	0.99954
ENSMUSG00000001134	Uxt	0.596349
ENSMUSG00000001138	Cnnm3	2.29032
ENSMUSG00000001143	Lman2l	1.53132
ENSMUSG00000001150	Mcm3ap	2.04212
ENSMUSG00000001151	Pcnt	4.05881
ENSMUSG00000001155	Ftcd	1.58703
ENSMUSG00000001156	Mxd1	3.02181
ENSMUSG00000001157	Gmcl1	1.33895
ENSMUSG00000001158	Snrnp27	2.99565
ENSMUSG00000001166	Oas1c	1.72238
ENSMUSG00000001173	Ocrl	1.48591
ENSMUSG00000001175	Calm1	1.5663
ENSMUSG00000001211	Agpat3	0.998316
ENSMUSG00000001227	Sema6b	2.55879
ENSMUSG00000001229	Dpp9	1.671
ENSMUSG00000001240	Ramp2	0.751907
ENSMUSG00000001247	Lsr	1.58059
ENSMUSG00000001248	Gramd1a	1.58304
ENSMUSG00000001249	Hpn	1.04221
ENSMUSG00000001270	Ckb	1.84571
ENSMUSG00000001280	Sp1	1.84771
ENSMUSG00000001281	Itgb7	1.63146
ENSMUSG00000001285	Myg1	1.35763
ENSMUSG00000001288	Rarg	3.16337
ENSMUSG00000001289	Pfdn5	0.632547
ENSMUSG00000001300	Efnb2	1.62772
ENSMUSG00000001305	Rrp15	1.01728
ENSMUSG00000001313	Rnd2	0.901255
ENSMUSG00000001323	Srr	0.761773
ENSMUSG00000001333	Sync	1.30121
ENSMUSG00000001348	Acp5	0.845359
ENSMUSG00000001366	Fbxo9	1.4269
ENSMUSG00000001376	Ccdc132	1.59616
ENSMUSG00000001380	Hars	1.23891
ENSMUSG00000001383	Zmat2	1.04131
ENSMUSG00000001403	Ube2c	0.453934
ENSMUSG00000001415	Smg5	1.83501
ENSMUSG00000001416	Cct3	1.17335
ENSMUSG00000001418	Glmp	0.876181
ENSMUSG00000001419	Mef2d	2.82311
ENSMUSG00000001420	Tmem79	6.24441
ENSMUSG00000001424	Snd1	1.56641
ENSMUSG00000001435	Col18a1	2.52153
ENSMUSG00000001436	Slc19a1	1.26379
ENSMUSG00000001440	Kpnb1	1.37555
ENSMUSG00000001441	Npepps	1.20362
ENSMUSG00000001445	Mrpl10	0.792765
ENSMUSG00000001467	Cyp51	0.841971
ENSMUSG00000001472	Tcf25	1.81106
ENSMUSG00000001473	Tubb6	1.72812
ENSMUSG00000001482	Def8	1.53304
ENSMUSG00000001506	Col1a1	1.89604
ENSMUSG00000001507	Itga3	2.38712
ENSMUSG00000001518	Itfg2	1.25109
ENSMUSG00000001521	Tulp3	2.08661
ENSMUSG00000001524	Gtf2h4	1.03812
ENSMUSG00000001525	Tubb5	1.36105
ENSMUSG00000001542	Ell2	1.94609
ENSMUSG00000001552	Jup	1.57126
ENSMUSG00000001555	Fkbp10	1.42205
ENSMUSG00000001569	Nom1	2.68095
ENSMUSG00000001576	Ergic1	0.913962
ENSMUSG00000001588	Acap1	2.16273
ENSMUSG00000001604	Tcea3	1.35927
ENSMUSG00000001627	Ifrd1	1.79955
ENSMUSG00000001630	Stk38l	1.49388
ENSMUSG00000001632	Brpf1	5.41007
ENSMUSG00000001642	Akr1b3	1.5022
ENSMUSG00000001663	Gstt1	0.786515
ENSMUSG00000001665	Gstt3	0.849584
ENSMUSG00000001666	Ddt	0.425754
ENSMUSG00000001670	Tat	1.98289
ENSMUSG00000001674	Ddx18	1.41449
ENSMUSG00000001687	Ubl3	0.907838
ENSMUSG00000001700	Gramd3	1.42748
ENSMUSG00000001707	Eef1e1	0.627531
ENSMUSG00000001729	Akt1	1.63653
ENSMUSG00000001741	Il16	1.40686
ENSMUSG00000001750	Tcirg1	1.86989
ENSMUSG00000001751	Naglu	1.28418
ENSMUSG00000001755	Coasy	1.37486
ENSMUSG00000001761	Smo	1.95927
ENSMUSG00000001763	Tspan33	0.900541
ENSMUSG00000001767	Crnkl1	1.98395
ENSMUSG00000001768	Rin2	1.93313
ENSMUSG00000001774	Chordc1	0.770034
ENSMUSG00000001783	Rtcb	1.27655
ENSMUSG00000001785	Pwp1	1.08319
ENSMUSG00000001786	Fbxo7	0.925601
ENSMUSG00000001794	Capns1	0.995089
ENSMUSG00000001802	Lrp3	2.58347
ENSMUSG00000001829	Clpb	1.13853
ENSMUSG00000001833	43350	1.22979
ENSMUSG00000001844	Zdhhc4	1.06438
ENSMUSG00000001847	Rac1	0.652519
ENSMUSG00000001855	Nup214	2.10375
ENSMUSG00000001870	Ltbp1	3.56346
ENSMUSG00000001891	Ugp2	0.589903
ENSMUSG00000001909	Trmt1	1.40902
ENSMUSG00000001910	Nacc1	2.47548
ENSMUSG00000001911	Nfix	2.55309
ENSMUSG00000001918	Slc1a5	2.39088
ENSMUSG00000001924	Uba1	1.15477
ENSMUSG00000001942	Siae	1.1143
ENSMUSG00000001943	Vsig2	2.20147
ENSMUSG00000001946	Esam	1.24844
ENSMUSG00000001948	Spa17	16.9047
ENSMUSG00000001962	Fam50a	1.67266
ENSMUSG00000001964	Emd	0.990335
ENSMUSG00000001983	Taco1	1.47426
ENSMUSG00000001995	Sipa1l2	3.62514
ENSMUSG00000001998	Ap4e1	1.80723
ENSMUSG00000001999	Blvra	0.91444
ENSMUSG00000002010	Idh3g	0.893735
ENSMUSG00000002014	Ssr4	0.554088
ENSMUSG00000002015	Bcap31	0.949632
ENSMUSG00000002017	Fam98a	1.43319
ENSMUSG00000002028	Kmt2a	5.81991
ENSMUSG00000002031	Ift46	1.40103
ENSMUSG00000002032	Tmem25	1.67484
ENSMUSG00000002033	Cd3g	0.846244
ENSMUSG00000002043	Trappc6a	0.682713
ENSMUSG00000002052	Supt6	3.80236
ENSMUSG00000002058	Unc119	1.16408
ENSMUSG00000002059	Rab34	0.951484
ENSMUSG00000002064	Sdf2	0.884874
ENSMUSG00000002068	Ccne1	0.869659
ENSMUSG00000002083	Bbc3	9.10789
ENSMUSG00000002102	Psmc3	1.14526
ENSMUSG00000002103	Acp2	1.35301
ENSMUSG00000002105	Slc39a13	1.42217
ENSMUSG00000002107	Celf2	1.56323
ENSMUSG00000002108	Nr1h3	1.05307
ENSMUSG00000002109	Ddb2	1.56606
ENSMUSG00000002111	Spi1	2.75701
ENSMUSG00000002129	Sf3a1	1.64436
ENSMUSG00000002147	Stat6	1.52429
ENSMUSG00000002205	Vrk3	1.26141
ENSMUSG00000002210	Smg9	1.89252
ENSMUSG00000002221	Paxip1	1.64612
ENSMUSG00000002222	Rmnd5a	1.81691
ENSMUSG00000002227	Mov10	2.54122
ENSMUSG00000002233	Rhoc	1.12624
ENSMUSG00000002249	Tead3	3.03997
ENSMUSG00000002250	Ppard	3.3882
ENSMUSG00000002257	Def6	2.51615
ENSMUSG00000002265	Peg3	5.38748
ENSMUSG00000002274	Metrn	1.58968
ENSMUSG00000002279	Lmf1	1.48174
ENSMUSG00000002280	Narfl	1.74159
ENSMUSG00000002289	Angptl4	2.02961
ENSMUSG00000002297	Dbf4	2.22519
ENSMUSG00000002307	Daxx	4.5316
ENSMUSG00000002308	Cd320	1.03667
ENSMUSG00000002319	Ipo4	1.49031
ENSMUSG00000002320	Tm9sf1	0.944557
ENSMUSG00000002324	Rec8	1.90264
ENSMUSG00000002325	Irf9	1.63642
ENSMUSG00000002326	Gmpr2	1.14295
ENSMUSG00000002329	Mdp1	0.723209
ENSMUSG00000002332	Dhrs1	0.830721
ENSMUSG00000002342	Tmem161a	1.15543
ENSMUSG00000002343	Armc6	1.41491
ENSMUSG00000002345	2310045N01Rik	0.661352
ENSMUSG00000002346	Slc25a42	1.14718
ENSMUSG00000002365	Snx9	1.1833
ENSMUSG00000002372	Ranbp3	1.9064
ENSMUSG00000002379	Ndufa11	0.495117
ENSMUSG00000002393	Nr2f6	2.29182
ENSMUSG00000002395	Use1	0.707842
ENSMUSG00000002396	Ocel1	2.34397
ENSMUSG00000002409	Dyrk1b	1.80401
ENSMUSG00000002413	Braf	1.90723
ENSMUSG00000002416	Ndufb2	0.436533
ENSMUSG00000002428	Hltf	1.32566
ENSMUSG00000002455	Prpf6	2.21979
ENSMUSG00000002458	Rgs19	1.34842
ENSMUSG00000002475	Abhd3	0.456754
ENSMUSG00000002477	Snrpd1	0.646707
ENSMUSG00000002486	Tchp	2.88178
ENSMUSG00000002496	Tsc2	2.14936
ENSMUSG00000002504	Slc9a3r2	1.67062
ENSMUSG00000002524	Puf60	1.12737
ENSMUSG00000002546	Golga2	1.97548
ENSMUSG00000002550	Uck1	0.974384
ENSMUSG00000002580	Mien1	0.532907
ENSMUSG00000002588	Pon1	0.723193
ENSMUSG00000002602	Axl	1.63939
ENSMUSG00000002603	Tgfb1	1.20136
ENSMUSG00000002608	Ccdc97	2.01727
ENSMUSG00000002617	Zfp40	2.38571
ENSMUSG00000002625	Akap8l	3.08834
ENSMUSG00000002635	Pdcd2l	0.822867
ENSMUSG00000002658	Gtf2f1	3.45359
ENSMUSG00000002660	Clpp	0.971038
ENSMUSG00000002661	Alkbh7	0.745206
ENSMUSG00000002668	Dennd1c	2.70462
ENSMUSG00000002679	Med6	1.25418
ENSMUSG00000002699	Lcp2	4.09763
ENSMUSG00000002718	Cse1l	0.819686
ENSMUSG00000002728	Naa20	1.05546
ENSMUSG00000002731	Prkra	0.871993
ENSMUSG00000002732	Fkbp7	0.651519
ENSMUSG00000002733	Plekha3	0.787364
ENSMUSG00000002741	Ykt6	0.987363
ENSMUSG00000002748	Baz1b	2.91885
ENSMUSG00000002763	Pex6	2.23652
ENSMUSG00000002767	Mrpl2	0.792706
ENSMUSG00000002768	Mea1	0.649677
ENSMUSG00000002769	Gnmt	0.758538
ENSMUSG00000002778	Kdelr1	0.819443
ENSMUSG00000002781	Tmem143	1.20486
ENSMUSG00000002797	Ggct	0.705934
ENSMUSG00000002803	Btbd6	1.49786
ENSMUSG00000002804	Nudt14	0.593088
ENSMUSG00000002812	Flii	2.01122
ENSMUSG00000002814	Top3a	2.15693
ENSMUSG00000002820	Atg4d	1.90489
ENSMUSG00000002825	Qtrt1	1.51912
ENSMUSG00000002831	Plin4	4.62788
ENSMUSG00000002833	Hdgfrp2	2.15512
ENSMUSG00000002835	Chaf1a	2.175
ENSMUSG00000002844	Adprh	1.37699
ENSMUSG00000002845	Tmem39a	2.39169
ENSMUSG00000002846	Timmdc1	0.813977
ENSMUSG00000002847	Pla1a	0.732274
ENSMUSG00000002871	Tpra1	1.89437
ENSMUSG00000002881	Nab1	0.806857
ENSMUSG00000002885	Adgre5	2.27935
ENSMUSG00000002897	Il17ra	1.51483
ENSMUSG00000002900	Lamb1	1.88533
ENSMUSG00000002908	Kcnn1	1.33444
ENSMUSG00000002910	Arrdc2	2.46199
ENSMUSG00000002944	Cd36	0.642432
ENSMUSG00000002948	Map2k7	1.94318
ENSMUSG00000002949	Timm44	1.36055
ENSMUSG00000002957	Ap2a2	1.57765
ENSMUSG00000002963	Pnkp	1.21206
ENSMUSG00000002968	Med25	1.32623
ENSMUSG00000002980	Bcam	1.82851
ENSMUSG00000002981	Clptm1	0.795551
ENSMUSG00000002983	Relb	2.63241
ENSMUSG00000002984	Tomm40	1.05063
ENSMUSG00000002985	Apoe	1.31204
ENSMUSG00000002992	Apoc2	0.559089
ENSMUSG00000002996	Hbp1	1.05044
ENSMUSG00000003031	Cdkn1b	1.27532
ENSMUSG00000003032	Klf4	3.3089
ENSMUSG00000003033	Ap1m1	1.38628
ENSMUSG00000003037	Rab8a	0.653485
ENSMUSG00000003038	Hmgn2	0.597711
ENSMUSG00000003039	Fam32a	1.79172
ENSMUSG00000003053	Cyp2c29	0.56815
ENSMUSG00000003062	Stard3nl	0.790646
ENSMUSG00000003068	Stk11	2.01385
ENSMUSG00000003072	Atp5d	0.641519
ENSMUSG00000003099	Ppp5c	1.642
ENSMUSG00000003119	Cdk12	2.68826
ENSMUSG00000003123	Lipe	3.1926
ENSMUSG00000003131	Pafah1b2	1.34364
ENSMUSG00000003134	Tbc1d8	2.05777
ENSMUSG00000003135	Cnot11	1.18463
ENSMUSG00000003153	Slc2a3	1.47341
ENSMUSG00000003154	Foxj2	4.13636
ENSMUSG00000003161	Sri	0.81981
ENSMUSG00000003166	Dgcr2	1.70792
ENSMUSG00000003184	Irf3	1.46266
ENSMUSG00000003190	Bcl2l12	1.05205
ENSMUSG00000003198	Zfp959	1.26116
ENSMUSG00000003199	Mpnd	1.02047
ENSMUSG00000003200	Sh3gl1	2.36485
ENSMUSG00000003206	Ebi3	1.01309
ENSMUSG00000003208	Ccdc94	1.72214
ENSMUSG00000003226	Ranbp2	2.05004
ENSMUSG00000003228	Grk5	2.2766
ENSMUSG00000003233	Dvl3	1.90948
ENSMUSG00000003234	Abcf3	1.80181
ENSMUSG00000003235	Eif2b5	1.07993
ENSMUSG00000003269	Cyth2	1.44787
ENSMUSG00000003283	Hck	1.49475
ENSMUSG00000003299	Mrpl4	1.28424
ENSMUSG00000003308	Keap1	1.83522
ENSMUSG00000003316	Glg1	2.31247
ENSMUSG00000003344	Btbd2	1.63531
ENSMUSG00000003345	Csnk1g2	1.97776
ENSMUSG00000003346	Abhd17a	0.776408
ENSMUSG00000003348	Mob3a	1.71473
ENSMUSG00000003355	Fkbp11	0.649335
ENSMUSG00000003360	Ddx23	1.9306
ENSMUSG00000003363	Pld3	1.16278
ENSMUSG00000003378	Grik5	2.10244
ENSMUSG00000003380	Rabac1	0.643622
ENSMUSG00000003382	Etv3	3.67306
ENSMUSG00000003402	Prkcsh	1.68228
ENSMUSG00000003420	Fcgrt	1.1187
ENSMUSG00000003421	Nosip	1.39359
ENSMUSG00000003423	Pih1d1	0.98503
ENSMUSG00000003429	Rps11	0.642921
ENSMUSG00000003435	Supt5	2.52117
ENSMUSG00000003437	Paf1	1.87918
ENSMUSG00000003438	Timm50	0.89869
ENSMUSG00000003444	Med29	0.50319
ENSMUSG00000003458	Ncstn	1.35803
ENSMUSG00000003464	Pex19	0.868683
ENSMUSG00000003477	Inmt	0.721486
ENSMUSG00000003484	Cyp4f18	1.1893
ENSMUSG00000003500	Impdh1	2.10152
ENSMUSG00000003518	Dusp3	1.33412
ENSMUSG00000003526	Prodh	1.66237
ENSMUSG00000003527	Dgcr14	1.77677
ENSMUSG00000003528	Slc25a1	0.936122
ENSMUSG00000003531	Dgcr6	0.747176
ENSMUSG00000003541	Ier3	10.2756
ENSMUSG00000003546	Klc4	1.58506
ENSMUSG00000003549	Ercc1	1.56659
ENSMUSG00000003555	Cyp17a1	0.811875
ENSMUSG00000003559	As3mt	0.7715
ENSMUSG00000003573	Homer3	1.01871
ENSMUSG00000003575	Crtc1	2.76757
ENSMUSG00000003581	Rnf215	1.52386
ENSMUSG00000003585	Sec14l2	1.14772
ENSMUSG00000003604	Aven	0.966112
ENSMUSG00000003617	Cp	1.1452
ENSMUSG00000003623	Crot	0.733136
ENSMUSG00000003644	Rps6ka1	1.48531
ENSMUSG00000003660	Snrnp200	1.52301
ENSMUSG00000003662	Ciao1	1.23167
ENSMUSG00000003680	Taf6l	1.6226
ENSMUSG00000003721	Insig2	0.806114
ENSMUSG00000003731	Kpna6	1.94568
ENSMUSG00000003746	Man1a	0.916419
ENSMUSG00000003752	Itpkc	2.41764
ENSMUSG00000003762	Adck4	1.31139
ENSMUSG00000003778	Brd8	2.48005
ENSMUSG00000003779	Kif20a	2.28616
ENSMUSG00000003808	Farsa	1.53042
ENSMUSG00000003809	Gcdh	1.00072
ENSMUSG00000003810	Mast2	3.51721
ENSMUSG00000003812	Dnase2a	2.59562
ENSMUSG00000003813	Rad23a	0.879191
ENSMUSG00000003814	Calr	2.07456
ENSMUSG00000003824	Syce2	1.43392
ENSMUSG00000003847	Nfat5	2.38387
ENSMUSG00000003848	Nob1	1.74142
ENSMUSG00000003849	Nqo1	0.671332
ENSMUSG00000003865	Gys1	2.97782
ENSMUSG00000003868	Ruvbl2	1.31436
ENSMUSG00000003873	Bax	1.05785
ENSMUSG00000003923	Tfam	1.03437
ENSMUSG00000003929	Zfp81	1.99147
ENSMUSG00000003948	Mmd	0.765695
ENSMUSG00000003949	Hlf	0.839305
ENSMUSG00000003955	Fam162a	0.489702
ENSMUSG00000003970	Rpl8	0.822062
ENSMUSG00000003992	Ssbp2	10.3346
ENSMUSG00000004018	Fancl	0.784202
ENSMUSG00000004032	Gstm5	0.525062
ENSMUSG00000004035	Gstm7	0.66084
ENSMUSG00000004038	Gstm3	0.624876
ENSMUSG00000004040	Stat3	1.42455
ENSMUSG00000004043	Stat5a	1.97277
ENSMUSG00000004044	Ptrf	2.17743
ENSMUSG00000004054	Map3k11	3.1189
ENSMUSG00000004056	Akt2	1.18641
ENSMUSG00000004069	Dnaja3	0.927321
ENSMUSG00000004070	Hmox2	0.864112
ENSMUSG00000004071	Cdip1	1.18625
ENSMUSG00000004085	Zak	1.73985
ENSMUSG00000004096	Cwc15	0.588406
ENSMUSG00000004098	Col5a3	4.35291
ENSMUSG00000004099	Dnmt1	2.52897
ENSMUSG00000004100	Ppan	4.65579
ENSMUSG00000004105	Angptl2	1.691
ENSMUSG00000004127	Trmt10a	2.09851
ENSMUSG00000004187	Kifc2	1.71148
ENSMUSG00000004207	Psap	1.21432
ENSMUSG00000004221	Ikbkg	1.11511
ENSMUSG00000004233	Wars2	1.42814
ENSMUSG00000004263	Atn1	4.59425
ENSMUSG00000004264	Phb2	1.09549
ENSMUSG00000004266	Ptpn6	2.20948
ENSMUSG00000004268	Emg1	0.911176
ENSMUSG00000004270	Lpcat3	1.22689
ENSMUSG00000004285	Atp6v1f	0.47281
ENSMUSG00000004317	Clcn5	1.76288
ENSMUSG00000004319	Clcn3	1.26134
ENSMUSG00000004341	Gpx6	2.2835
ENSMUSG00000004356	Utp20	2.80841
ENSMUSG00000004359	Spic	1.83945
ENSMUSG00000004364	Cul3	0.937406
ENSMUSG00000004383	Large	1.61447
ENSMUSG00000004393	Ddx56	1.34651
ENSMUSG00000004394	Tmed4	0.806491
ENSMUSG00000004446	Bid	1.32672
ENSMUSG00000004451	Ralb	1.3315
ENSMUSG00000004455	Ppp1cc	1.07914
ENSMUSG00000004460	Dnajb11	0.717268
ENSMUSG00000004462	Tbccd1	1.39882
ENSMUSG00000004473	Clec11a	0.510573
ENSMUSG00000004500	Zfp324	2.25495
ENSMUSG00000004508	Gab2	2.91728
ENSMUSG00000004530	Coro1c	1.81675
ENSMUSG00000004535	Tax1bp1	0.870574
ENSMUSG00000004558	Ndrg2	0.858081
ENSMUSG00000004561	Mettl17	2.06685
ENSMUSG00000004562	Arhgef40	2.99713
ENSMUSG00000004565	Pnpla6	3.55034
ENSMUSG00000004567	Mcoln1	1.14449
ENSMUSG00000004568	Arhgef18	2.29756
ENSMUSG00000004591	Pkn2	2.17652
ENSMUSG00000004610	Etfb	0.929374
ENSMUSG00000004626	Stxbp2	1.3449
ENSMUSG00000004631	Sgce	1.2003
ENSMUSG00000004633	Chn2	1.981
ENSMUSG00000004637	Wwox	0.827289
ENSMUSG00000004642	Slbp	0.743469
ENSMUSG00000004651	Tyr	1.11389
ENSMUSG00000004655	Aqp1	1.20127
ENSMUSG00000004661	Arid3b	2.91349
ENSMUSG00000004665	Cnn2	1.64948
ENSMUSG00000004667	Polr2e	0.903338
ENSMUSG00000004677	Myo9b	3.78659
ENSMUSG00000004698	Hdac9	2.53962
ENSMUSG00000004707	Ly9	1.28137
ENSMUSG00000004730	Adgre1	0.786964
ENSMUSG00000004748	Mtfp1	0.965495
ENSMUSG00000004768	Rab23	1.48896
ENSMUSG00000004771	Rab11a	0.707922
ENSMUSG00000004788	Eif2b2	3.45885
ENSMUSG00000004789	Dlst	1.05605
ENSMUSG00000004798	Ulk2	1.42301
ENSMUSG00000004814	Ccl24	0.598711
ENSMUSG00000004815	Dgkq	2.21039
ENSMUSG00000004837	Grap	1.92561
ENSMUSG00000004842	Pou1f1	6.15383
ENSMUSG00000004843	Chmp2b	2.08009
ENSMUSG00000004846	Plod3	1.72328
ENSMUSG00000004849	Ap1s1	0.847226
ENSMUSG00000004865	Srpk1	1.98979
ENSMUSG00000004880	Lbr	1.46772
ENSMUSG00000004891	Nes	9.13931
ENSMUSG00000004895	Prcc	2.21499
ENSMUSG00000004896	Rrnad1	2.9219
ENSMUSG00000004897	Hdgf	1.07683
ENSMUSG00000004929	Thop1	2.06432
ENSMUSG00000004931	Apba3	1.36736
ENSMUSG00000004934	Pias4	1.91282
ENSMUSG00000004936	Map2k1	0.886831
ENSMUSG00000004937	Sgta	1.19701
ENSMUSG00000004945	Tmem242	0.383548
ENSMUSG00000004947	Dtx2	1.94433
ENSMUSG00000004951	Hspb1	0.935949
ENSMUSG00000004980	Hnrnpa2b1	1.23656
ENSMUSG00000004994	Ccdc130	4.48749
ENSMUSG00000004996	Mri1	1.31053
ENSMUSG00000005034	Prkacb	1.0046
ENSMUSG00000005043	Sgsh	1.81616
ENSMUSG00000005054	Cstb	0.453183
ENSMUSG00000005057	Sh2b2	2.09505
ENSMUSG00000005069	Pex5	1.53483
ENSMUSG00000005078	Jkamp	0.855009
ENSMUSG00000005087	Cd44	1.07137
ENSMUSG00000005089	Slc1a2	1.90919
ENSMUSG00000005102	Eif2ak4	2.03179
ENSMUSG00000005103	Wdr1	1.05971
ENSMUSG00000005107	Slc2a9	1.05466
ENSMUSG00000005125	Ndrg1	1.70595
ENSMUSG00000005142	Man2b1	1.35834
ENSMUSG00000005150	Wdr83	1.09325
ENSMUSG00000005161	Prdx2	0.670699
ENSMUSG00000005198	Polr2a	2.65451
ENSMUSG00000005204	Senp3	1.20978
ENSMUSG00000005225	Plekha8	1.59505
ENSMUSG00000005233	Spc25	0.678524
ENSMUSG00000005251	Ripk4	2.97827
ENSMUSG00000005262	Ufd1l	0.931716
ENSMUSG00000005268	Prlr	0.823397
ENSMUSG00000005299	Letm1	3.1228
ENSMUSG00000005312	Ubqln1	0.667028
ENSMUSG00000005320	Fgfr4	1.89435
ENSMUSG00000005338	Cadm3	1.43861
ENSMUSG00000005354	Txn2	0.685228
ENSMUSG00000005362	Crbn	0.805657
ENSMUSG00000005370	Msh6	1.62697
ENSMUSG00000005371	Fbxo11	2.58513
ENSMUSG00000005373	Mlxipl	2.08624
ENSMUSG00000005374	Tbl2	2.88177
ENSMUSG00000005378	Wbscr22	0.853688
ENSMUSG00000005397	Nid1	1.57242
ENSMUSG00000005410	Mcm5	1.65708
ENSMUSG00000005413	Hmox1	1.40736
ENSMUSG00000005417	Mprip	2.28368
ENSMUSG00000005442	Cic	3.94961
ENSMUSG00000005447	Pafah1b3	0.488458
ENSMUSG00000005465	Il27ra	1.75072
ENSMUSG00000005469	Prkaca	0.880489
ENSMUSG00000005481	Ddx39	1.56852
ENSMUSG00000005483	Dnajb1	2.01338
ENSMUSG00000005493	Msh4	2.08171
ENSMUSG00000005501	Usp40	1.69355
ENSMUSG00000005505	Kbtbd4	2.14096
ENSMUSG00000005506	Celf1	1.47361
ENSMUSG00000005510	Ndufs3	0.629565
ENSMUSG00000005514	Por	1.72486
ENSMUSG00000005534	Insr	2.29259
ENSMUSG00000005547	Cyp2a5	0.93964
ENSMUSG00000005566	Trim28	1.99784
ENSMUSG00000005575	Ube2m	1.01824
ENSMUSG00000005580	Adcy9	1.83601
ENSMUSG00000005583	Mef2c	1.81581
ENSMUSG00000005609	Ctr9	2.56813
ENSMUSG00000005610	Eif4g2	1.21186
ENSMUSG00000005615	Pcyt1a	1.39372
ENSMUSG00000005621	Zfp592	2.98728
ENSMUSG00000005625	Psmd4	1.24623
ENSMUSG00000005656	Snx6	1.04434
ENSMUSG00000005667	Mthfd2	0.918143
ENSMUSG00000005672	Kit	2.75863
ENSMUSG00000005674	Tomm40l	1.32816
ENSMUSG00000005677	Nr1i3	1.53581
ENSMUSG00000005681	Apoa2	0.509345
ENSMUSG00000005682	Pan2	1.67459
ENSMUSG00000005683	Cs	1.03773
ENSMUSG00000005686	Ampd3	1.79081
ENSMUSG00000005687	Bcas2	0.823941
ENSMUSG00000005698	Ctcf	1.37234
ENSMUSG00000005699	Pard6a	2.09589
ENSMUSG00000005718	Tfap4	3.57644
ENSMUSG00000005732	Ranbp1	0.516932
ENSMUSG00000005774	Rfx5	3.26059
ENSMUSG00000005779	Psmb4	0.713188
ENSMUSG00000005802	Slc30a4	1.32374
ENSMUSG00000005803	Sqrdl	1.1544
ENSMUSG00000005804	Bloc1s6	1.04877
ENSMUSG00000005813	Metap1	1.02494
ENSMUSG00000005823	Gpr108	1.13393
ENSMUSG00000005836	Gata6	1.65051
ENSMUSG00000005846	Rsl1d1	1.32568
ENSMUSG00000005871	Apc	6.88855
ENSMUSG00000005873	Reep5	0.830982
ENSMUSG00000005881	Ergic3	0.995449
ENSMUSG00000005882	Uqcc1	0.923304
ENSMUSG00000005886	Ncoa2	2.6892
ENSMUSG00000005893	Nr2c2	1.94876
ENSMUSG00000005897	Nr2c1	0.91843
ENSMUSG00000005899	Smpd4	1.69124
ENSMUSG00000005907	Pex1	1.95067
ENSMUSG00000005936	Kctd20	1.62685
ENSMUSG00000005949	Ctns	2.20946
ENSMUSG00000005951	Shpk	1.36107
ENSMUSG00000005968	Tuft1	1.44579
ENSMUSG00000005973	Rcn1	1.24385
ENSMUSG00000005980	Dnase1	2.22397
ENSMUSG00000005981	Trap1	1.11986
ENSMUSG00000005982	Naa60	1.47749
ENSMUSG00000005983	1700037C18Rik	1.43201
ENSMUSG00000005986	Ankrd13d	1.26522
ENSMUSG00000006005	Tpr	8.85865
ENSMUSG00000006010	BC003331	0.807491
ENSMUSG00000006014	Prg4	7.82844
ENSMUSG00000006019	Dhx34	2.1507
ENSMUSG00000006021	Kptn	1.06656
ENSMUSG00000006024	Napa	1.06153
ENSMUSG00000006050	Sra1	0.826214
ENSMUSG00000006057	Atp5g1	0.378757
ENSMUSG00000006058	Snf8	0.614902
ENSMUSG00000006095	Tbcb	0.811401
ENSMUSG00000006127	Inpp5k	1.53745
ENSMUSG00000006134	Crkl	2.63361
ENSMUSG00000006154	Eps8l1	3.52648
ENSMUSG00000006169	Clint1	1.23853
ENSMUSG00000006191	Cdkal1	1.40982
ENSMUSG00000006205	Htra1	1.36344
ENSMUSG00000006215	Zbtb17	2.2755
ENSMUSG00000006218	Fam131c	1.09124
ENSMUSG00000006219	Fblim1	1.79198
ENSMUSG00000006235	Epor	3.33619
ENSMUSG00000006241	Ccdc159	0.781652
ENSMUSG00000006262	Mob1b	1.18497
ENSMUSG00000006273	Atp6v1b2	1.25847
ENSMUSG00000006276	Eps15l1	2.28877
ENSMUSG00000006281	Tep1	1.74503
ENSMUSG00000006288	Ttc5	1.23984
ENSMUSG00000006289	Osgep	1.07236
ENSMUSG00000006299	Aamp	1.34883
ENSMUSG00000006301	Tmbim1	0.903832
ENSMUSG00000006304	Arpc2	0.598145
ENSMUSG00000006307	Kmt2b	3.81467
ENSMUSG00000006310	Zbtb32	1.45531
ENSMUSG00000006315	Tmem147	0.437228
ENSMUSG00000006333	Rps9	0.70662
ENSMUSG00000006335	Tfpt	1.36959
ENSMUSG00000006342	Susd2	1.0116
ENSMUSG00000006344	Ggt5	2.55268
ENSMUSG00000006356	Crip2	1.49813
ENSMUSG00000006360	Crip1	0.670523
ENSMUSG00000006362	Cbfa2t3	3.93609
ENSMUSG00000006373	Pgrmc1	0.835809
ENSMUSG00000006378	Gcat	0.919366
ENSMUSG00000006386	Tek	1.81923
ENSMUSG00000006390	Elovl1	1.04337
ENSMUSG00000006392	Med8	0.805513
ENSMUSG00000006398	Cdc20	1.28981
ENSMUSG00000006412	Pfdn2	0.869893
ENSMUSG00000006418	Rnf114	1.18914
ENSMUSG00000006423	C330007P06Rik	0.830937
ENSMUSG00000006442	Srm	0.788684
ENSMUSG00000006445	Epha2	4.39468
ENSMUSG00000006456	Rbm14	1.70241
ENSMUSG00000006463	Zdhhc24	0.790056
ENSMUSG00000006471	Ndor1	2.32431
ENSMUSG00000006476	Nsmf	1.64915
ENSMUSG00000006494	Pdk1	1.36539
ENSMUSG00000006498	Ptbp1	1.77596
ENSMUSG00000006517	Mvd	1.7148
ENSMUSG00000006519	Cyba	0.808146
ENSMUSG00000006522	Itih3	1.44724
ENSMUSG00000006526	Tmem110	1.65225
ENSMUSG00000006527	Sfmbt1	1.85986
ENSMUSG00000006529	Itih1	1.44793
ENSMUSG00000006538	Ihh	4.70997
ENSMUSG00000006567	Atp7b	1.68692
ENSMUSG00000006575	Rundc3a	1.30867
ENSMUSG00000006585	Cdt1	1.72236
ENSMUSG00000006589	Aprt	0.793198
ENSMUSG00000006599	Gtf2h1	1.0492
ENSMUSG00000006611	Hfe	0.809657
ENSMUSG00000006641	Slc5a6	1.5394
ENSMUSG00000006673	Qrich1	1.67797
ENSMUSG00000006676	Usp19	1.90829
ENSMUSG00000006678	Pola1	1.46218
ENSMUSG00000006699	Cdc42	0.59305
ENSMUSG00000006705	Pknox1	1.53889
ENSMUSG00000006711	D130043K22Rik	1.55289
ENSMUSG00000006715	Gmnn	0.80336
ENSMUSG00000006717	Acot13	0.609624
ENSMUSG00000006728	Cdk4	1.05074
ENSMUSG00000006731	B4galnt1	1.72354
ENSMUSG00000006732	Mettl1	1.32357
ENSMUSG00000006736	Tspan31	0.5913
ENSMUSG00000006740	Kif5b	1.32018
ENSMUSG00000006763	Saal1	1.09783
ENSMUSG00000006777	Krt23	0.831513
ENSMUSG00000006782	Cnp	1.27061
ENSMUSG00000006784	Ttc25	1.47731
ENSMUSG00000006800	Sulf2	1.89609
ENSMUSG00000006818	Sod2	0.720807
ENSMUSG00000006850	Tmco6	1.38946
ENSMUSG00000006906	Stambp	0.897913
ENSMUSG00000006920	Ezh1	1.99214
ENSMUSG00000006930	Hap1	3.27312
ENSMUSG00000006931	P3h4	2.29821
ENSMUSG00000006932	Ctnnb1	1.08344
ENSMUSG00000006941	Eif1b	0.824539
ENSMUSG00000006958	Chrd	3.00069
ENSMUSG00000006998	Psmd2	1.44742
ENSMUSG00000007029	Vars	2.39989
ENSMUSG00000007033	Hspa1l	2.82262
ENSMUSG00000007035	Msh5	2.01235
ENSMUSG00000007036	Abhd16a	1.50745
ENSMUSG00000007038	Neu1	0.990731
ENSMUSG00000007039	Ddah2	1.78184
ENSMUSG00000007041	Clic1	1.15326
ENSMUSG00000007050	Lsm2	0.813284
ENSMUSG00000007080	Pole	3.54902
ENSMUSG00000007216	Zfp775	2.69045
ENSMUSG00000007338	Mrpl49	0.50102
ENSMUSG00000007379	Dennd2c	0.85097
ENSMUSG00000007411	Mark3	1.45336
ENSMUSG00000007415	Gatad1	0.760072
ENSMUSG00000007458	M6pr	0.905956
ENSMUSG00000007476	Lrrc8a	2.77184
ENSMUSG00000007564	Ppp2r1a	1.0878
ENSMUSG00000007570	Fance	1.53116
ENSMUSG00000007589	Tinf2	0.934273
ENSMUSG00000007594	Hapln4	1.74455
ENSMUSG00000007603	Dus3l	1.79203
ENSMUSG00000007610	Gtpbp3	1.12228
ENSMUSG00000007613	Tgfbr1	2.28882
ENSMUSG00000007617	Homer1	2.02566
ENSMUSG00000007655	Cav1	1.61551
ENSMUSG00000007656	Arpp19	0.588766
ENSMUSG00000007659	Bcl2l1	2.28561
ENSMUSG00000007670	Khsrp	1.53581
ENSMUSG00000007721	Ccdc124	1.40133
ENSMUSG00000007739	Cct4	0.847018
ENSMUSG00000007777	0610009B22Rik	0.672079
ENSMUSG00000007812	Zfp655	1.8262
ENSMUSG00000007815	Rhoa	0.879862
ENSMUSG00000007817	Zmiz1	4.16722
ENSMUSG00000007827	Ankrd26	2.34359
ENSMUSG00000007833	Aldh16a1	1.82693
ENSMUSG00000007836	Hnrnpa0	1.92764
ENSMUSG00000007837	Prrg2	0.748811
ENSMUSG00000007850	Hnrnph1	1.2603
ENSMUSG00000007867	Ift43	1.35417
ENSMUSG00000007872	Id3	12.4632
ENSMUSG00000007880	Arid1a	6.47385
ENSMUSG00000007891	Ctsd	1.09784
ENSMUSG00000007892	Rplp1	0.431056
ENSMUSG00000007950	Abhd8	1.37872
ENSMUSG00000007987	Ift22	0.896745
ENSMUSG00000008035	Mid1ip1	1.59316
ENSMUSG00000008036	Ap2s1	0.717434
ENSMUSG00000008090	Fgfrl1	1.57974
ENSMUSG00000008140	Emc10	1.01573
ENSMUSG00000008153	Clstn3	1.82872
ENSMUSG00000008167	Fbxw9	0.953156
ENSMUSG00000008200	Fnbp4	3.29144
ENSMUSG00000008226	Scrn3	0.764435
ENSMUSG00000008301	Phax	3.25339
ENSMUSG00000008305	Tle1	1.03637
ENSMUSG00000008333	Snrpb2	0.780856
ENSMUSG00000008348	Ubc	3.55573
ENSMUSG00000008373	Prpf31	1.30177
ENSMUSG00000008384	Sertad1	1.36427
ENSMUSG00000008393	Carhsp1	0.972518
ENSMUSG00000008398	Elk3	1.87702
ENSMUSG00000008429	Herpud2	0.8383
ENSMUSG00000008435	Rdh13	1.56848
ENSMUSG00000008450	Nutf2	0.799687
ENSMUSG00000008475	Arpc5	0.801832
ENSMUSG00000008496	Pou2f2	18.7737
ENSMUSG00000008540	Mgst1	0.465452
ENSMUSG00000008575	Nfib	2.7719
ENSMUSG00000008604	Ubqln4	1.57789
ENSMUSG00000008668	Rps18	0.584022
ENSMUSG00000008682	Rpl10	0.580364
ENSMUSG00000008683	Rps15a	0.557784
ENSMUSG00000008690	Ncaph2	1.09532
ENSMUSG00000008730	Hipk1	1.99511
ENSMUSG00000008763	Man1a2	2.31199
ENSMUSG00000008822	Acyp1	0.503708
ENSMUSG00000008845	Cd163	1.64688
ENSMUSG00000008855	Hdac5	1.95872
ENSMUSG00000008859	Rala	0.926781
ENSMUSG00000008892	Vdac3	0.740952
ENSMUSG00000008958	Vps72	1.40947
ENSMUSG00000008976	Gabpa	1.36648
ENSMUSG00000008999	Bmp7	1.36503
ENSMUSG00000009013	Dynll1	0.661088
ENSMUSG00000009030	Pdcl	1.26033
ENSMUSG00000009035	Tmem184b	1.74745
ENSMUSG00000009073	Nf2	2.44443
ENSMUSG00000009075	Cabp7	1.35147
ENSMUSG00000009076	Zmat5	0.98066
ENSMUSG00000009079	Ewsr1	1.9222
ENSMUSG00000009090	Ap1b1	1.63934
ENSMUSG00000009092	Derl3	2.27442
ENSMUSG00000009108	Gnat2	0.981238
ENSMUSG00000009112	Bcl2l13	1.67017
ENSMUSG00000009115	Spatc1l	2.19826
ENSMUSG00000009145	Dqx1	1.83132
ENSMUSG00000009207	Lnp	1.60778
ENSMUSG00000009281	Rarres2	0.618722
ENSMUSG00000009291	Pttg1ip	0.765606
ENSMUSG00000009292	Trpm2	0.685097
ENSMUSG00000009293	Ube2g2	1.12523
ENSMUSG00000009376	Met	1.60753
ENSMUSG00000009378	Slc16a12	1.14856
ENSMUSG00000009406	Elk1	2.03149
ENSMUSG00000009418	Nav1	5.34525
ENSMUSG00000009470	Tnpo1	1.38666
ENSMUSG00000009535	Rnmt	1.06184
ENSMUSG00000009545	Kcnq1	1.96567
ENSMUSG00000009549	Srp14	0.686004
ENSMUSG00000009555	Cdk9	1.53238
ENSMUSG00000009563	Tor2a	0.882824
ENSMUSG00000009566	Fpgs	2.31023
ENSMUSG00000009569	Mkl2	3.45512
ENSMUSG00000009575	Cbx5	1.76227
ENSMUSG00000009585	Apobec3	3.86844
ENSMUSG00000009614	Sardh	1.65432
ENSMUSG00000009621	Vav2	2.20656
ENSMUSG00000009630	Ppp2cb	0.927483
ENSMUSG00000009633	G0s2	8.25813
ENSMUSG00000009640	Dmap1	1.36085
ENSMUSG00000009646	Pla2g12b	0.719213
ENSMUSG00000009647	Mcu	1.00264
ENSMUSG00000009654	Oit3	0.894134
ENSMUSG00000009681	Bcr	2.96502
ENSMUSG00000009687	Fxyd5	1.98853
ENSMUSG00000009733	Tfcp2	1.59384
ENSMUSG00000009739	Pou6f1	3.9332
ENSMUSG00000009741	Ubp1	1.80063
ENSMUSG00000009772	Nuak2	3.55478
ENSMUSG00000009828	Ick	2.26633
ENSMUSG00000009863	Sdhb	0.742759
ENSMUSG00000009894	Snap47	0.863739
ENSMUSG00000009905	Kdsr	0.964031
ENSMUSG00000009907	Vps4b	1.22074
ENSMUSG00000009927	Rps25	1.02676
ENSMUSG00000009995	Taz	1.14452
ENSMUSG00000010025	Aldh3a2	0.762044
ENSMUSG00000010045	Tmem115	1.19343
ENSMUSG00000010047	Hyal2	2.02604
ENSMUSG00000010048	Ifrd2	1.13236
ENSMUSG00000010051	Hyal1	3.30238
ENSMUSG00000010054	Tusc2	1.24001
ENSMUSG00000010057	Nprl2	1.36486
ENSMUSG00000010064	Slc38a3	1.33815
ENSMUSG00000010067	Rassf1	1.56559
ENSMUSG00000010095	Slc3a2	1.47827
ENSMUSG00000010097	Nxf1	1.34799
ENSMUSG00000010110	Stx5a	1.34597
ENSMUSG00000010122	Slc47a1	0.886002
ENSMUSG00000010175	Prox1	2.57134
ENSMUSG00000010205	Raver1	1.7856
ENSMUSG00000010277	2610507B11Rik	3.02346
ENSMUSG00000010290	AI597479	4.06678
ENSMUSG00000010307	Tmem86a	1.14273
ENSMUSG00000010358	Ifi35	1.23281
ENSMUSG00000010362	Rdm1	0.931321
ENSMUSG00000010376	Nedd8	0.844144
ENSMUSG00000010392	Gosr1	1.17312
ENSMUSG00000010406	Mrpl52	0.524891
ENSMUSG00000010453	Kansl3	1.86615
ENSMUSG00000010517	Faf1	1.02852
ENSMUSG00000010538	Tsacc	0.876624
ENSMUSG00000010554	Mettl16	1.05956
ENSMUSG00000010601	Apol7a	3.77821
ENSMUSG00000010607	Pigyl	0.795097
ENSMUSG00000010608	Rbm25	4.82327
ENSMUSG00000010609	Psen2	0.848102
ENSMUSG00000010651	Acaa1b	1.1677
ENSMUSG00000010663	Fads1	0.857154
ENSMUSG00000010721	Lmbr1	1.24125
ENSMUSG00000010755	Cars	2.15832
ENSMUSG00000010760	Phlda2	3.58984
ENSMUSG00000010797	Wnt2	1.02078
ENSMUSG00000010911	Apip	0.659138
ENSMUSG00000010914	Pdhx	0.881628
ENSMUSG00000010936	Vac14	1.97725
ENSMUSG00000011096	Akt1s1	1.44895
ENSMUSG00000011114	Tbrg1	1.11561
ENSMUSG00000011148	Adssl1	1.19274
ENSMUSG00000011158	Brf1	1.39483
ENSMUSG00000011179	Odc1	1.40495
ENSMUSG00000011254	Thg1l	0.740621
ENSMUSG00000011257	Pabpc4	2.21825
ENSMUSG00000011263	Exoc3l2	2.57195
ENSMUSG00000011267	Zfp296	3.10181
ENSMUSG00000011305	Plin5	1.48396
ENSMUSG00000011306	Sugp1	2.07318
ENSMUSG00000011382	Dhdh	1.03213
ENSMUSG00000011427	Zfp790	2.69216
ENSMUSG00000011658	Fuz	1.40466
ENSMUSG00000011752	Pgam1	0.724036
ENSMUSG00000011831	Evi5	1.27767
ENSMUSG00000011832	Evi5l	2.12372
ENSMUSG00000011837	Snapc2	1.3555
ENSMUSG00000011877	Git1	2.3919
ENSMUSG00000011884	Gltp	1.10438
ENSMUSG00000011958	Bnip2	1.22183
ENSMUSG00000011960	Ccnt1	2.80628
ENSMUSG00000012017	Scarf2	2.87783
ENSMUSG00000012076	Brms1l	1.37948
ENSMUSG00000012114	Med15	3.31783
ENSMUSG00000012117	Dhdds	1.17535
ENSMUSG00000012187	Mogat1	1.28582
ENSMUSG00000012296	Tjap1	2.65436
ENSMUSG00000012396	Nanog	1.24019
ENSMUSG00000012405	Rpl15	0.563117
ENSMUSG00000012422	Tmem167	0.702515
ENSMUSG00000012428	Steap4	1.36202
ENSMUSG00000012429	Mplkip	0.906924
ENSMUSG00000012483	Rpa3	0.493112
ENSMUSG00000012519	Mlkl	1.78864
ENSMUSG00000012535	Tnpo3	1.16751
ENSMUSG00000012609	Ttll5	3.1796
ENSMUSG00000012640	Zfp715	2.18471
ENSMUSG00000012848	Rps5	0.60393
ENSMUSG00000013033	Adgrl1	4.85944
ENSMUSG00000013076	Amotl1	5.48293
ENSMUSG00000013089	Etv5	1.88162
ENSMUSG00000013150	Gfod2	1.88659
ENSMUSG00000013155	Enkd1	0.902153
ENSMUSG00000013160	Atp6v0d1	0.69994
ENSMUSG00000013236	Ptprs	2.80525
ENSMUSG00000013275	Slc41a1	2.70011
ENSMUSG00000013465	Nelfb	2.06797
ENSMUSG00000013495	Tmem175	1.96078
ENSMUSG00000013539	Tango2	0.96744
ENSMUSG00000013593	Ndufs2	0.93119
ENSMUSG00000013622	Atraid	0.774729
ENSMUSG00000013629	Cad	2.52299
ENSMUSG00000013646	Sh3bp5l	1.55282
ENSMUSG00000013662	Atad1	0.991839
ENSMUSG00000013663	Pten	1.2891
ENSMUSG00000013698	Pea15a	1.93132
ENSMUSG00000013701	Timm23	0.694016
ENSMUSG00000013707	Tnfaip8l2	1.64876
ENSMUSG00000013736	Trnt1	1.11693
ENSMUSG00000013787	Ehmt2	2.46953
ENSMUSG00000013822	Elof1	0.615346
ENSMUSG00000013833	Med16	1.6547
ENSMUSG00000013846	St3gal1	1.70747
ENSMUSG00000013858	Tmem259	1.61251
ENSMUSG00000013878	Rnf170	0.837822
ENSMUSG00000013973	Dedd	1.67553
ENSMUSG00000013997	Nit1	1.15585
ENSMUSG00000014039	Prdm15	2.32344
ENSMUSG00000014074	Rnf168	2.54993
ENSMUSG00000014075	Tctex1d2	0.850408
ENSMUSG00000014077	Chp1	0.992005
ENSMUSG00000014158	Trpv4	2.70872
ENSMUSG00000014164	Klhl3	2.44083
ENSMUSG00000014177	Tvp23b	0.66541
ENSMUSG00000014195	Dnajc7	1.945
ENSMUSG00000014226	Cacybp	0.817888
ENSMUSG00000014232	Cluap1	2.84539
ENSMUSG00000014243	Zswim7	0.805622
ENSMUSG00000014245	Pigl	1.26171
ENSMUSG00000014294	Ndufa2	0.386881
ENSMUSG00000014301	Pam16	0.862501
ENSMUSG00000014303	Glis2	1.92973
ENSMUSG00000014313	Cox6c	0.333016
ENSMUSG00000014349	Ube2z	1.33267
ENSMUSG00000014353	Tmem87b	1.43127
ENSMUSG00000014355	Anapc1	2.00238
ENSMUSG00000014361	Mertk	2.5421
ENSMUSG00000014402	Tsg101	0.743861
ENSMUSG00000014418	Hps5	1.84293
ENSMUSG00000014426	Map3k4	2.72971
ENSMUSG00000014444	Piezo1	3.41623
ENSMUSG00000014470	Rnf166	1.48644
ENSMUSG00000014496	Ankrd28	1.44759
ENSMUSG00000014498	Ankrd52	2.10636
ENSMUSG00000014503	Pkd2l2	2.49254
ENSMUSG00000014504	Srp19	0.564381
ENSMUSG00000014542	Clec4f	1.13608
ENSMUSG00000014547	Wdfy2	1.33139
ENSMUSG00000014550	Rbsn	2.21839
ENSMUSG00000014551	Mrps25	1.05771
ENSMUSG00000014554	Dguok	1.24251
ENSMUSG00000014592	Camta1	0.500028
ENSMUSG00000014599	Csf1	4.64132
ENSMUSG00000014601	Strip1	2.20644
ENSMUSG00000014606	Slc25a11	0.829122
ENSMUSG00000014633	Cmc2	0.531137
ENSMUSG00000014668	Chfr	1.5017
ENSMUSG00000014704	Hoxa2	1.95908
ENSMUSG00000014748	Tex261	1.06984
ENSMUSG00000014763	Fam120b	2.0676
ENSMUSG00000014767	Tbp	2.96707
ENSMUSG00000014769	Psmb1	0.555371
ENSMUSG00000014773	Dll1	10.1033
ENSMUSG00000014776	Nol3	1.41209
ENSMUSG00000014778	Fhod1	2.32155
ENSMUSG00000014791	Elmo3	1.86615
ENSMUSG00000014837	4931428F04Rik	1.81525
ENSMUSG00000014850	Msh3	2.14042
ENSMUSG00000014852	Adamts13	1.4416
ENSMUSG00000014856	Tmem208	0.717867
ENSMUSG00000014859	E2f4	3.51018
ENSMUSG00000014867	Surf4	0.774741
ENSMUSG00000014873	Surf2	2.24022
ENSMUSG00000014905	Dnajb9	0.906621
ENSMUSG00000014907	Naf1	1.62804
ENSMUSG00000014932	Yes1	0.950461
ENSMUSG00000014956	Ppp1cb	0.617481
ENSMUSG00000014959	Gorasp2	0.936592
ENSMUSG00000014980	Tsen15	1.21017
ENSMUSG00000015002	Efr3a	1.22839
ENSMUSG00000015013	Trappc2l	0.639895
ENSMUSG00000015016	Acsf3	1.22727
ENSMUSG00000015023	Ddx19a	0.852731
ENSMUSG00000015027	Galns	1.21472
ENSMUSG00000015083	C8g	0.447768
ENSMUSG00000015085	Entpd2	1.29062
ENSMUSG00000015087	Rabl6	5.95986
ENSMUSG00000015090	Ptgds	2.86257
ENSMUSG00000015092	Edf1	0.784713
ENSMUSG00000015094	Npdc1	1.1505
ENSMUSG00000015095	Fbxw5	1.50943
ENSMUSG00000015112	Slc25a13	1.10348
ENSMUSG00000015120	Ube2i	1.02054
ENSMUSG00000015126	Tsr3	1.25263
ENSMUSG00000015127	Unkl	2.89139
ENSMUSG00000015133	Lrrk1	3.13247
ENSMUSG00000015143	Actn1	2.07018
ENSMUSG00000015149	Sirt2	0.811201
ENSMUSG00000015165	Hnrnpl	3.72454
ENSMUSG00000015176	Nolc1	2.83685
ENSMUSG00000015189	Casd1	1.77022
ENSMUSG00000015202	Cnksr3	2.59886
ENSMUSG00000015214	Mtmr1	1.10383
ENSMUSG00000015217	Hmgb3	0.974142
ENSMUSG00000015224	Cyp2j9	1.6531
ENSMUSG00000015243	Abca1	2.50939
ENSMUSG00000015247	Nipsnap3b	0.481166
ENSMUSG00000015289	Lage3	0.613133
ENSMUSG00000015290	Ubl4a	0.78586
ENSMUSG00000015291	Gdi1	0.983788
ENSMUSG00000015305	Sash1	1.94737
ENSMUSG00000015312	Gadd45b	2.50455
ENSMUSG00000015316	Slamf1	1.25189
ENSMUSG00000015335	Zdhhc12	1.09754
ENSMUSG00000015337	Endog	0.833004
ENSMUSG00000015340	Cybb	0.861997
ENSMUSG00000015341	Golga7	0.752125
ENSMUSG00000015342	Xk	1.26069
ENSMUSG00000015354	Pcolce2	0.834592
ENSMUSG00000015355	Cd48	1.02043
ENSMUSG00000015357	Clpx	1.02601
ENSMUSG00000015363	Trabd	1.43344
ENSMUSG00000015377	Dennd6b	1.80715
ENSMUSG00000015396	Cd83	1.62173
ENSMUSG00000015461	Atf6b	1.48698
ENSMUSG00000015467	Egfl8	3.0257
ENSMUSG00000015468	Notch4	3.20681
ENSMUSG00000015474	Ppt2	0.864127
ENSMUSG00000015478	Rnf5	0.548337
ENSMUSG00000015488	Cacfd1	0.690354
ENSMUSG00000015501	Hivep2	5.08258
ENSMUSG00000015522	Arnt	1.87353
ENSMUSG00000015536	Mocs2	0.551576
ENSMUSG00000015542	Nat9	1.17086
ENSMUSG00000015568	Lpl	1.09839
ENSMUSG00000015575	Atp6v0e	0.767217
ENSMUSG00000015597	Zfp318	5.08351
ENSMUSG00000015605	Srf	3.51051
ENSMUSG00000015647	Lama5	2.17111
ENSMUSG00000015653	Steap2	0.86667
ENSMUSG00000015656	Hspa8	2.16898
ENSMUSG00000015668	Pdzd11	0.598024
ENSMUSG00000015671	Psma2	0.613718
ENSMUSG00000015672	Mrpl32	0.660101
ENSMUSG00000015697	Setdb1	2.03252
ENSMUSG00000015702	Anxa9	0.730167
ENSMUSG00000015711	Prune	1.23698
ENSMUSG00000015714	Cers2	0.735088
ENSMUSG00000015733	Capza2	0.624016
ENSMUSG00000015745	Plekho1	3.45617
ENSMUSG00000015747	Vps45	1.09977
ENSMUSG00000015748	Prpf3	2.75799
ENSMUSG00000015749	Anp32e	3.75996
ENSMUSG00000015750	Aph1a	1.10311
ENSMUSG00000015755	Tab2	2.16229
ENSMUSG00000015757	Ppil4	1.67162
ENSMUSG00000015759	Cnih1	0.474039
ENSMUSG00000015776	Med22	1.9698
ENSMUSG00000015790	Surf1	0.896084
ENSMUSG00000015804	Med28	0.971671
ENSMUSG00000015806	Qdpr	0.68447
ENSMUSG00000015812	Gnrh1	2.55035
ENSMUSG00000015837	Sqstm1	1.1213
ENSMUSG00000015839	Nfe2l2	2.2256
ENSMUSG00000015843	Rxrg	1.09336
ENSMUSG00000015846	Rxra	2.73068
ENSMUSG00000015850	Adamtsl4	2.35203
ENSMUSG00000015854	Cd5l	1.27534
ENSMUSG00000015869	Prpsap1	0.955521
ENSMUSG00000015882	Lcorl	1.44435
ENSMUSG00000015889	Lta4h	1.22322
ENSMUSG00000015890	Amdhd1	0.985281
ENSMUSG00000015932	Dstn	0.62747
ENSMUSG00000015937	H2afy	0.993006
ENSMUSG00000015942	Gtf2ird2	3.30562
ENSMUSG00000015943	Bola1	0.554277
ENSMUSG00000015944	Gatsl2	2.98368
ENSMUSG00000015947	Fcgr1	1.23179
ENSMUSG00000015950	Ncf1	1.11322
ENSMUSG00000015961	Adss	0.814104
ENSMUSG00000015966	Il17rb	1.46705
ENSMUSG00000015968	Cacna1d	2.23808
ENSMUSG00000015970	Chdh	2.234
ENSMUSG00000015971	Actr8	1.07818
ENSMUSG00000015994	Fnta	0.716849
ENSMUSG00000016018	Skiv2l2	1.13065
ENSMUSG00000016024	Lbp	0.903812
ENSMUSG00000016028	Celsr1	3.40226
ENSMUSG00000016087	Fli1	1.59831
ENSMUSG00000016128	Stard13	3.17242
ENSMUSG00000016181	Diexf	1.89841
ENSMUSG00000016194	Hsd11b1	0.478142
ENSMUSG00000016206	H2-M3	1.68774
ENSMUSG00000016252	Atp5e	0.294757
ENSMUSG00000016253	Nelfcd	1.18358
ENSMUSG00000016256	Ctsz	0.837596
ENSMUSG00000016257	Slmo2	0.581408
ENSMUSG00000016308	Ube2a	0.585192
ENSMUSG00000016319	Slc25a5	0.765401
ENSMUSG00000016344	Ppdpf	0.69872
ENSMUSG00000016356	Col20a1	2.42573
ENSMUSG00000016382	Pls3	0.742847
ENSMUSG00000016409	Nkap	2.26605
ENSMUSG00000016427	Ndufa1	0.364161
ENSMUSG00000016477	E2f3	1.94196
ENSMUSG00000016481	Cr1l	0.790977
ENSMUSG00000016487	Ppfibp1	1.73762
ENSMUSG00000016494	Cd34	4.21311
ENSMUSG00000016495	Plgrkt	1.4222
ENSMUSG00000016496	Cd274	3.12855
ENSMUSG00000016503	Gtf3a	0.396255
ENSMUSG00000016510	Mtif3	2.16715
ENSMUSG00000016520	Lnx2	2.12327
ENSMUSG00000016526	Dyrk3	1.63239
ENSMUSG00000016528	Mapkapk2	1.60003
ENSMUSG00000016534	Lamp2	0.64222
ENSMUSG00000016541	Atxn10	1.10189
ENSMUSG00000016554	Eif3d	1.2602
ENSMUSG00000016559	H3f3b	0.958912
ENSMUSG00000016619	Nup50	1.55972
ENSMUSG00000016637	Ift27	0.625932
ENSMUSG00000016664	Pacsin2	1.55417
ENSMUSG00000016756	Cmah	1.5376
ENSMUSG00000016757	Ttll12	1.39404
ENSMUSG00000016758	Bik	1.97533
ENSMUSG00000016831	Tox4	1.24178
ENSMUSG00000016833	Mrps18c	0.440213
ENSMUSG00000016921	Srsf6	0.791156
ENSMUSG00000016933	Plcg1	2.15814
ENSMUSG00000016940	Kctd2	2.25185
ENSMUSG00000016942	Tmprss6	1.44251
ENSMUSG00000016946	Kctd5	2.75892
ENSMUSG00000016984	Etaa1	5.1771
ENSMUSG00000017002	Slpi	0.362887
ENSMUSG00000017009	Sdc4	2.10267
ENSMUSG00000017057	Il13ra1	0.892257
ENSMUSG00000017119	Nbr1	1.27526
ENSMUSG00000017132	Cyth1	2.02633
ENSMUSG00000017144	Rnd3	2.6815
ENSMUSG00000017167	Cntnap1	2.17443
ENSMUSG00000017176	Nt5c3b	1.48326
ENSMUSG00000017188	Coa3	0.543512
ENSMUSG00000017210	Med24	2.28352
ENSMUSG00000017221	Psmd3	1.12784
ENSMUSG00000017264	Exosc10	1.93394
ENSMUSG00000017286	Glod4	0.780996
ENSMUSG00000017288	Vps53	1.02165
ENSMUSG00000017291	Taok1	2.2008
ENSMUSG00000017299	Dnttip1	1.31445
ENSMUSG00000017307	Acot8	0.974265
ENSMUSG00000017309	Cd300lg	1.02924
ENSMUSG00000017344	Vtn	1.0716
ENSMUSG00000017376	Nlk	1.35025
ENSMUSG00000017386	Traf4	1.68299
ENSMUSG00000017390	Aldoc	0.839395
ENSMUSG00000017404	Rpl19	0.898441
ENSMUSG00000017405	Nek8	1.98759
ENSMUSG00000017418	Arl5b	1.61862
ENSMUSG00000017421	Zfp207	0.910879
ENSMUSG00000017428	Psmd11	0.687588
ENSMUSG00000017446	C1qtnf1	2.35058
ENSMUSG00000017453	Pipox	0.696537
ENSMUSG00000017466	Timp2	1.28883
ENSMUSG00000017478	Zc3h18	3.07612
ENSMUSG00000017485	Top2b	1.43587
ENSMUSG00000017491	Rarb	1.72293
ENSMUSG00000017493	Igfbp4	0.965079
ENSMUSG00000017548	Suz12	2.39711
ENSMUSG00000017561	Crlf3	1.5063
ENSMUSG00000017615	Tnfaip1	1.25571
ENSMUSG00000017631	Abr	2.46889
ENSMUSG00000017639	Rab11fip4	3.91905
ENSMUSG00000017652	Cd40	2.18333
ENSMUSG00000017664	Slc35c2	1.34929
ENSMUSG00000017670	Elmo2	1.95824
ENSMUSG00000017677	Wsb1	1.36298
ENSMUSG00000017679	Ttpal	2.28683
ENSMUSG00000017686	Rhot1	1.14144
ENSMUSG00000017697	Ada	1.99549
ENSMUSG00000017707	Serinc3	0.64848
ENSMUSG00000017713	Tha1	2.20401
ENSMUSG00000017715	Pgs1	2.03406
ENSMUSG00000017716	Birc5	2.10467
ENSMUSG00000017718	Afmid	1.85066
ENSMUSG00000017721	Pigt	1.37469
ENSMUSG00000017723	Wfdc2	0.501681
ENSMUSG00000017734	Dbndd2	1.40265
ENSMUSG00000017740	Slc12a5	1.83173
ENSMUSG00000017747	Ghdc	1.43998
ENSMUSG00000017754	Pltp	1.25593
ENSMUSG00000017756	Slc12a7	2.89799
ENSMUSG00000017760	Ctsa	1.04285
ENSMUSG00000017764	Zswim1	2.1286
ENSMUSG00000017765	Slc12a4	2.02434
ENSMUSG00000017774	Myo1c	2.09362
ENSMUSG00000017776	Crk	1.16431
ENSMUSG00000017778	Cox7c	0.366833
ENSMUSG00000017781	Pitpna	0.96165
ENSMUSG00000017801	Mlx	0.879966
ENSMUSG00000017802	Fam134c	1.42746
ENSMUSG00000017830	Dhx58	1.25409
ENSMUSG00000017831	Rab5a	0.667288
ENSMUSG00000017837	Nkiras2	1.03668
ENSMUSG00000017843	Ppp2r5c	1.76046
ENSMUSG00000017858	Ift52	0.868708
ENSMUSG00000017868	Sgk2	1.07432
ENSMUSG00000017929	B4galt5	2.64491
ENSMUSG00000017950	Hnf4a	2.67995
ENSMUSG00000017969	Ptgis	1.20564
ENSMUSG00000017978	Cadps2	1.00824
ENSMUSG00000017999	Ddx27	2.06281
ENSMUSG00000018001	Cyth3	3.76189
ENSMUSG00000018008	Cyth4	2.59364
ENSMUSG00000018012	Rac3	4.90132
ENSMUSG00000018040	Rrp7a	1.26274
ENSMUSG00000018042	Cyb5r3	0.991822
ENSMUSG00000018068	Ints2	1.47074
ENSMUSG00000018076	Med13l	3.22192
ENSMUSG00000018102	Hist1h2bc	0.491251
ENSMUSG00000018143	Mafk	5.17826
ENSMUSG00000018160	Med1	2.84215
ENSMUSG00000018166	Erbb3	2.25131
ENSMUSG00000018167	Stard3	1.35384
ENSMUSG00000018169	Mfng	1.50866
ENSMUSG00000018171	Vmp1	0.686639
ENSMUSG00000018189	Uchl5	0.577931
ENSMUSG00000018196	Glrx2	0.885001
ENSMUSG00000018209	Stk4	2.28234
ENSMUSG00000018217	Pmp22	1.17057
ENSMUSG00000018238	Gdf9	1.8807
ENSMUSG00000018239	Zcchc10	2.67574
ENSMUSG00000018286	Psmb6	0.625949
ENSMUSG00000018287	Spag7	0.77926
ENSMUSG00000018293	Pfn1	0.77919
ENSMUSG00000018322	Tomm34	1.60232
ENSMUSG00000018326	Ywhab	0.826636
ENSMUSG00000018334	Ksr1	7.1679
ENSMUSG00000018339	Gpx3	0.522987
ENSMUSG00000018340	Anxa6	1.80323
ENSMUSG00000018347	Zkscan6	2.75254
ENSMUSG00000018362	Kpna2	1.10801
ENSMUSG00000018363	Smurf2	1.64059
ENSMUSG00000018372	Cep95	4.51828
ENSMUSG00000018377	Vezf1	1.88201
ENSMUSG00000018378	Cuedc1	4.89476
ENSMUSG00000018379	Srsf1	1.35714
ENSMUSG00000018381	Abi3	0.457913
ENSMUSG00000018387	Shroom1	3.48175
ENSMUSG00000018395	Kif3a	1.44109
ENSMUSG00000018398	43351	2.47801
ENSMUSG00000018401	Mtmr4	1.69144
ENSMUSG00000018405	Mrm1	2.98004
ENSMUSG00000018411	Mapt	5.34766
ENSMUSG00000018412	Kansl1	3.54242
ENSMUSG00000018415	Gid4	1.16527
ENSMUSG00000018417	Myo1b	1.15923
ENSMUSG00000018425	Dhx40	1.01797
ENSMUSG00000018427	Ypel2	2.82886
ENSMUSG00000018428	Akap1	2.3575
ENSMUSG00000018433	Nol11	1.02049
ENSMUSG00000018442	Derl2	0.856066
ENSMUSG00000018446	C1qbp	0.692999
ENSMUSG00000018449	Rpain	0.969058
ENSMUSG00000018459	Slc13a3	1.27643
ENSMUSG00000018474	Chd3	3.73705
ENSMUSG00000018476	Kdm6b	5.29375
ENSMUSG00000018481	Appbp2	1.08987
ENSMUSG00000018501	Ncor1	4.56828
ENSMUSG00000018507	Trpv2	1.86302
ENSMUSG00000018509	Cenpv	0.805845
ENSMUSG00000018537	Pcgf2	2.66201
ENSMUSG00000018541	Cwc25	2.94501
ENSMUSG00000018547	Pip4k2b	2.74944
ENSMUSG00000018548	Trim37	1.8284
ENSMUSG00000018559	Ctdnep1	1.11479
ENSMUSG00000018565	Elp5	1.007
ENSMUSG00000018567	Gabarap	0.623726
ENSMUSG00000018572	Phf23	2.4571
ENSMUSG00000018574	Acadvl	1.71514
ENSMUSG00000018583	G3bp1	1.67091
ENSMUSG00000018585	Atox1	0.356085
ENSMUSG00000018593	Sparc	1.20268
ENSMUSG00000018599	Mief2	1.77113
ENSMUSG00000018604	Tbx3	2.87809
ENSMUSG00000018648	Dusp14	1.53958
ENSMUSG00000018651	Tada2a	1.44137
ENSMUSG00000018654	Ikzf1	1.81586
ENSMUSG00000018659	Pnpo	0.844393
ENSMUSG00000018661	Cog1	1.6951
ENSMUSG00000018666	Cbx1	0.911996
ENSMUSG00000018669	Cdk5rap3	1.52416
ENSMUSG00000018672	Copz2	0.56757
ENSMUSG00000018677	Slc25a39	0.905838
ENSMUSG00000018678	Sp2	1.86832
ENSMUSG00000018697	Aatf	1.71708
ENSMUSG00000018707	Dync1h1	3.72213
ENSMUSG00000018727	Cpsf4l	0.972172
ENSMUSG00000018733	Pex12	1.21083
ENSMUSG00000018736	Ndel1	1.26065
ENSMUSG00000018740	Slc25a35	1.15003
ENSMUSG00000018750	Zbtb4	3.24641
ENSMUSG00000018752	Tnfsfm13	0.868266
ENSMUSG00000018761	Mpdu1	0.822444
ENSMUSG00000018765	Fxr2	2.14667
ENSMUSG00000018770	Atp5g3	0.568496
ENSMUSG00000018774	Cd68	0.778199
ENSMUSG00000018796	Acsl1	1.16662
ENSMUSG00000018800	Abca5	1.23666
ENSMUSG00000018809	Smyd4	1.56229
ENSMUSG00000018819	Lsp1	2.72582
ENSMUSG00000018820	Zfyve27	1.749
ENSMUSG00000018821	Avpi1	0.536247
ENSMUSG00000018830	Myh11	2.47386
ENSMUSG00000018841	Rad51d	0.999751
ENSMUSG00000018845	Unc45b	1.90473
ENSMUSG00000018846	Pank3	1.51879
ENSMUSG00000018848	Rars	1.31552
ENSMUSG00000018849	Wwc1	2.03545
ENSMUSG00000018858	Ict1	0.63656
ENSMUSG00000018861	Fdxr	1.76307
ENSMUSG00000018882	Mrpl45	0.809109
ENSMUSG00000018899	Irf1	3.91319
ENSMUSG00000018900	Slc22a5	1.32387
ENSMUSG00000018906	P4ha2	1.63852
ENSMUSG00000018909	Arrb1	5.25732
ENSMUSG00000018920	Cxcl16	1.12621
ENSMUSG00000018921	Pelp1	5.03534
ENSMUSG00000018923	Med11	1.38136
ENSMUSG00000018927	Ccl6	0.610785
ENSMUSG00000018931	Natd1	2.50019
ENSMUSG00000018932	Map2k3	1.24236
ENSMUSG00000018965	Ywhah	1.10468
ENSMUSG00000018974	Sart3	3.63861
ENSMUSG00000018983	E2f2	3.54867
ENSMUSG00000018995	Nars2	0.676506
ENSMUSG00000018999	Slc35b4	1.17479
ENSMUSG00000019039	Dalrd3	1.28162
ENSMUSG00000019054	Fis1	0.696613
ENSMUSG00000019055	Plod1	1.41669
ENSMUSG00000019066	Rab3d	1.36025
ENSMUSG00000019080	Mfsd3	1.03631
ENSMUSG00000019082	Slc25a22	1.36564
ENSMUSG00000019087	Atp6ap1	1.03732
ENSMUSG00000019088	Dnase1l1	1.28473
ENSMUSG00000019122	Ccl9	0.45059
ENSMUSG00000019132	BC005537	1.48677
ENSMUSG00000019139	Isyna1	1.47098
ENSMUSG00000019143	Hars2	1.30249
ENSMUSG00000019158	Tmem160	0.565541
ENSMUSG00000019173	Rab5c	0.845723
ENSMUSG00000019179	Mdh2	0.966305
ENSMUSG00000019188	H13	1.18471
ENSMUSG00000019189	Rnf145	2.15627
ENSMUSG00000019194	Scn1b	1.84804
ENSMUSG00000019210	Atp6v1e1	3.82333
ENSMUSG00000019232	Etnppl	1.19791
ENSMUSG00000019254	Ppp1r12c	2.21978
ENSMUSG00000019256	Ahr	1.70171
ENSMUSG00000019261	Map1s	2.60802
ENSMUSG00000019295	Tmem129	1.01632
ENSMUSG00000019297	Nop9	0.84053
ENSMUSG00000019301	Hsd17b1	2.61235
ENSMUSG00000019302	Atp6v0a1	1.19153
ENSMUSG00000019303	Psmc3ip	1.43199
ENSMUSG00000019312	Grb7	3.17298
ENSMUSG00000019338	Zfp687	2.42796
ENSMUSG00000019362	D8Ertd738e	0.725476
ENSMUSG00000019368	Sec14l4	2.36131
ENSMUSG00000019370	Calm3	1.01724
ENSMUSG00000019373	Cops3	0.759052
ENSMUSG00000019428	Fkbp8	0.962821
ENSMUSG00000019432	Ddx39b	2.85177
ENSMUSG00000019433	Gipc1	1.2133
ENSMUSG00000019437	Tlcd1	1.4813
ENSMUSG00000019461	Plscr3	1.77527
ENSMUSG00000019464	Ptger1	2.36092
ENSMUSG00000019467	Arhgef25	2.67774
ENSMUSG00000019470	Xab2	1.86766
ENSMUSG00000019471	Cdc37	1.05722
ENSMUSG00000019478	Rab4a	0.742116
ENSMUSG00000019487	Trip10	2.20712
ENSMUSG00000019494	Cops6	0.80603
ENSMUSG00000019505	Ubb	1.30792
ENSMUSG00000019518	Ap4m1	1.48838
ENSMUSG00000019528	Gyg	0.728942
ENSMUSG00000019539	Rcn3	1.67973
ENSMUSG00000019558	Slc6a8	1.55591
ENSMUSG00000019577	Pdk4	2.71308
ENSMUSG00000019578	Ubxn6	1.31242
ENSMUSG00000019579	Mydgf	0.477445
ENSMUSG00000019590	Cyb561	1.56005
ENSMUSG00000019647	Sema6a	2.58886
ENSMUSG00000019659	Ccdc12	0.884336
ENSMUSG00000019689	1110001J03Rik	0.357913
ENSMUSG00000019699	Akt3	2.79107
ENSMUSG00000019710	Mrpl24	0.821872
ENSMUSG00000019715	Gle1	1.30579
ENSMUSG00000019718	L3hypdh	0.8591
ENSMUSG00000019726	Lyst	2.18742
ENSMUSG00000019731	Slc35e1	1.64885
ENSMUSG00000019732	Calr3	0.80715
ENSMUSG00000019734	Tmc4	2.64172
ENSMUSG00000019737	Syne4	1.04556
ENSMUSG00000019738	Polr2i	0.554756
ENSMUSG00000019756	Prl8a1	2.28583
ENSMUSG00000019761	Krt10	1.25235
ENSMUSG00000019762	Iyd	0.71021
ENSMUSG00000019763	Rmnd1	0.871528
ENSMUSG00000019768	Esr1	1.44215
ENSMUSG00000019773	Fbxo5	2.13919
ENSMUSG00000019774	Mtrf1l	1.38347
ENSMUSG00000019777	Hdac2	2.66346
ENSMUSG00000019779	Frk	0.91312
ENSMUSG00000019782	Rwdd1	2.09416
ENSMUSG00000019790	Stxbp5	1.82106
ENSMUSG00000019791	Hint3	0.409299
ENSMUSG00000019792	Trmt11	2.41564
ENSMUSG00000019794	Katna1	1.6811
ENSMUSG00000019795	Pcmt1	0.75689
ENSMUSG00000019796	Lrp11	1.5905
ENSMUSG00000019797	1700021F05Rik	1.12727
ENSMUSG00000019802	Sec63	1.40993
ENSMUSG00000019804	Snx3	0.692982
ENSMUSG00000019806	Aig1	0.896932
ENSMUSG00000019808	Adat2	0.727413
ENSMUSG00000019809	Pex3	0.657435
ENSMUSG00000019810	Fuca2	1.27358
ENSMUSG00000019813	Cep57l1	1.94522
ENSMUSG00000019814	Ltv1	1.44079
ENSMUSG00000019818	Cd164	0.728155
ENSMUSG00000019820	Utrn	2.49952
ENSMUSG00000019822	Smpd2	1.51107
ENSMUSG00000019826	Zbtb24	2.02459
ENSMUSG00000019831	Wasf1	1.31806
ENSMUSG00000019832	Rab32	0.7682
ENSMUSG00000019837	Gtf3c6	0.590772
ENSMUSG00000019838	Slc16a10	1.56471
ENSMUSG00000019841	Rev3l	2.97145
ENSMUSG00000019842	Traf3ip2	1.98933
ENSMUSG00000019843	Fyn	1.6221
ENSMUSG00000019846	Lama4	2.55971
ENSMUSG00000019849	Prep	1.33965
ENSMUSG00000019851	Perp	0.521362
ENSMUSG00000019854	Reps1	1.42605
ENSMUSG00000019857	Asf1a	0.988368
ENSMUSG00000019861	Gopc	1.31919
ENSMUSG00000019863	Qrsl1	1.60227
ENSMUSG00000019864	Rtn4ip1	1.12149
ENSMUSG00000019866	Aim1	2.63438
ENSMUSG00000019868	Vta1	0.614348
ENSMUSG00000019872	Smpdl3a	0.509925
ENSMUSG00000019873	Reep3	0.910973
ENSMUSG00000019874	Fabp7	0.699798
ENSMUSG00000019876	Pkib	3.49244
ENSMUSG00000019877	Serinc1	0.620257
ENSMUSG00000019878	Hsf2	1.61649
ENSMUSG00000019880	Rspo3	2.40507
ENSMUSG00000019883	Echdc1	0.274458
ENSMUSG00000019889	Ptprk	1.66463
ENSMUSG00000019891	Dcbld1	2.25065
ENSMUSG00000019897	Ccdc59	1.40675
ENSMUSG00000019906	Lin7a	0.895743
ENSMUSG00000019907	Ppp1r12a	7.12628
ENSMUSG00000019916	P4ha1	1.70486
ENSMUSG00000019917	43353	1.11206
ENSMUSG00000019920	Lims1	1.39393
ENSMUSG00000019923	Zwint	0.953873
ENSMUSG00000019927	Ube2d1	1.61207
ENSMUSG00000019929	Dcn	0.801178
ENSMUSG00000019935	Slc17a8	1.0794
ENSMUSG00000019942	Cdk1	1.09983
ENSMUSG00000019943	Atp2b1	1.82214
ENSMUSG00000019944	Rhobtb1	1.92198
ENSMUSG00000019945	1700040L02Rik	1.11752
ENSMUSG00000019947	Arid5b	3.81156
ENSMUSG00000019948	Actr6	0.832455
ENSMUSG00000019951	Uhrf1bp1l	1.24881
ENSMUSG00000019952	Poc1b	0.96846
ENSMUSG00000019960	Dusp6	4.18431
ENSMUSG00000019961	Tmpo	1.04333
ENSMUSG00000019966	Kitl	2.85591
ENSMUSG00000019969	Psen1	1.07345
ENSMUSG00000019970	Sgk1	3.06134
ENSMUSG00000019975	Ikbip	2.28407
ENSMUSG00000019977	Hbs1l	1.37335
ENSMUSG00000019978	Epb4.1l2	2.59524
ENSMUSG00000019979	Apaf1	1.45088
ENSMUSG00000019984	Med23	2.31036
ENSMUSG00000019987	Arg1	0.768362
ENSMUSG00000019988	Nedd1	2.51146
ENSMUSG00000019989	Enpp3	1.80481
ENSMUSG00000019996	Map7	2.45113
ENSMUSG00000019997	Ctgf	10.7392
ENSMUSG00000019998	Stx7	1.01976
ENSMUSG00000020003	Pex7	0.562898
ENSMUSG00000020009	Ifngr1	2.25491
ENSMUSG00000020010	Vnn3	0.893401
ENSMUSG00000020015	Cdk17	1.53614
ENSMUSG00000020017	Hal	1.20703
ENSMUSG00000020018	Snrpf	0.491376
ENSMUSG00000020019	Ntn4	1.25871
ENSMUSG00000020021	Fgd6	2.08303
ENSMUSG00000020022	Ndufa12	1.11083
ENSMUSG00000020023	Tmcc3	1.94486
ENSMUSG00000020024	Cep83	3.85328
ENSMUSG00000020027	Socs2	1.08886
ENSMUSG00000020029	Nudt4	0.937849
ENSMUSG00000020032	Nuak1	4.35792
ENSMUSG00000020034	Tcp11l2	1.10622
ENSMUSG00000020037	Rfx4	1.26925
ENSMUSG00000020038	Cry1	1.19566
ENSMUSG00000020044	Timp3	1.18139
ENSMUSG00000020048	Hsp90b1	2.68395
ENSMUSG00000020051	Pah	0.661688
ENSMUSG00000020053	Igf1	1.87812
ENSMUSG00000020056	Ccdc53	0.486094
ENSMUSG00000020057	Dram1	1.96928
ENSMUSG00000020059	Sycp3	1.53322
ENSMUSG00000020063	Sirt1	1.92809
ENSMUSG00000020064	Herc4	1.08762
ENSMUSG00000020069	Hnrnph3	1.42053
ENSMUSG00000020070	Rufy2	1.05031
ENSMUSG00000020072	Pbld2	0.869385
ENSMUSG00000020074	Ccar1	10.5348
ENSMUSG00000020075	Ddx21	2.69198
ENSMUSG00000020076	Ddx50	1.24886
ENSMUSG00000020077	Srgn	0.526949
ENSMUSG00000020078	Vps26a	0.839103
ENSMUSG00000020079	Supv3l1	1.13007
ENSMUSG00000020085	Aifm2	1.26978
ENSMUSG00000020086	H2afy2	2.84072
ENSMUSG00000020087	Tysnd1	2.02195
ENSMUSG00000020088	Sar1a	1.01908
ENSMUSG00000020089	Ppa1	0.776869
ENSMUSG00000020091	Eif4ebp2	1.31024
ENSMUSG00000020092	Pald1	2.46654
ENSMUSG00000020097	Sgpl1	1.15145
ENSMUSG00000020098	Pcbd1	0.545546
ENSMUSG00000020099	Unc5b	2.18963
ENSMUSG00000020100	Slc29a3	2.356
ENSMUSG00000020101	4632428N05Rik	2.11621
ENSMUSG00000020102	Slc16a7	0.617848
ENSMUSG00000020105	Lrig3	9.07575
ENSMUSG00000020107	Anapc16	0.61104
ENSMUSG00000020108	Ddit4	38.3312
ENSMUSG00000020109	Dnajb12	1.13883
ENSMUSG00000020111	Micu1	1.04414
ENSMUSG00000020114	Cand1	1.1451
ENSMUSG00000020115	Tbk1	1.24158
ENSMUSG00000020116	Pno1	0.485905
ENSMUSG00000020120	Plek	2.10427
ENSMUSG00000020121	Srgap1	4.02648
ENSMUSG00000020122	Egfr	1.87475
ENSMUSG00000020123	Avpr1a	1.22194
ENSMUSG00000020124	Usp15	1.60875
ENSMUSG00000020128	Vps54	1.6322
ENSMUSG00000020130	Tbc1d15	1.00537
ENSMUSG00000020131	Pcsk4	1.26707
ENSMUSG00000020132	Rab21	0.916519
ENSMUSG00000020133	2310011J03Rik	1.40298
ENSMUSG00000020134	Peli1	1.47374
ENSMUSG00000020137	Thap2	1.92413
ENSMUSG00000020140	Lgr5	3.30069
ENSMUSG00000020142	Slc1a4	1.3358
ENSMUSG00000020143	Dock2	3.09098
ENSMUSG00000020149	Rab1	0.698549
ENSMUSG00000020150	Gamt	0.660782
ENSMUSG00000020152	Actr2	0.73019
ENSMUSG00000020153	Ndufs7	0.706736
ENSMUSG00000020154	Ptprb	3.37204
ENSMUSG00000020156	Mum1	2.08928
ENSMUSG00000020160	Meis1	1.33832
ENSMUSG00000020163	Uqcr11	0.415058
ENSMUSG00000020166	Cnot2	1.19196
ENSMUSG00000020167	Tcf3	2.29838
ENSMUSG00000020170	Frs2	2.06905
ENSMUSG00000020171	Yeats4	1.44783
ENSMUSG00000020173	Cobl	1.73229
ENSMUSG00000020176	Grb10	1.53044
ENSMUSG00000020178	Adora2a	2.33394
ENSMUSG00000020180	Snrpd3	0.68141
ENSMUSG00000020182	Ddc	0.967875
ENSMUSG00000020183	Cpm	0.876164
ENSMUSG00000020184	Mdm2	2.16969
ENSMUSG00000020186	Csrp2	0.842836
ENSMUSG00000020189	Osbpl8	1.63416
ENSMUSG00000020190	Mknk2	1.62388
ENSMUSG00000020196	Cabin1	2.81159
ENSMUSG00000020198	Ap3d1	3.67358
ENSMUSG00000020205	Phlda1	2.7772
ENSMUSG00000020211	Sf3a2	1.34621
ENSMUSG00000020219	Timm13	0.518218
ENSMUSG00000020220	Vps13d	2.79634
ENSMUSG00000020224	Llph	1.11802
ENSMUSG00000020225	Tmbim4	0.459775
ENSMUSG00000020227	Irak3	2.14086
ENSMUSG00000020228	Helb	3.04927
ENSMUSG00000020230	Prmt2	2.24251
ENSMUSG00000020231	Dip2a	3.16248
ENSMUSG00000020232	Hmg20b	1.58365
ENSMUSG00000020235	Fzr1	1.45039
ENSMUSG00000020238	Ncln	1.25072
ENSMUSG00000020241	Col6a2	1.89514
ENSMUSG00000020246	Hcfc2	1.33191
ENSMUSG00000020248	Nfyb	0.965651
ENSMUSG00000020250	Txnrd1	1.08561
ENSMUSG00000020253	Ppm1m	1.17072
ENSMUSG00000020255	D10Wsu102e	1.01151
ENSMUSG00000020257	Wdr82	2.15691
ENSMUSG00000020258	Glyctk	1.66874
ENSMUSG00000020260	Pofut2	1.50619
ENSMUSG00000020261	Slc36a1	1.74614
ENSMUSG00000020262	Adarb1	2.95598
ENSMUSG00000020263	Appl2	1.06321
ENSMUSG00000020265	Sumo3	1.10411
ENSMUSG00000020267	Hint1	0.503984
ENSMUSG00000020268	Lyrm7	0.389163
ENSMUSG00000020271	Fbxw11	1.36442
ENSMUSG00000020272	Stk10	3.69175
ENSMUSG00000020273	Papolg	4.05912
ENSMUSG00000020275	Rel	3.97571
ENSMUSG00000020277	Pfkl	2.11749
ENSMUSG00000020280	Pus10	1.08187
ENSMUSG00000020282	Rhbdf1	2.40536
ENSMUSG00000020283	Pex13	0.536143
ENSMUSG00000020284	1810043G02Rik	0.924101
ENSMUSG00000020287	Mpg	1.00967
ENSMUSG00000020288	Ahsa2	1.71688
ENSMUSG00000020289	Nprl3	1.7925
ENSMUSG00000020290	Xpo1	1.07727
ENSMUSG00000020300	Cpeb4	3.01054
ENSMUSG00000020305	Asb3	0.924649
ENSMUSG00000020307	Cdc34	0.954033
ENSMUSG00000020308	Tpgs1	1.24889
ENSMUSG00000020309	Chac2	0.937583
ENSMUSG00000020311	Erlec1	0.818166
ENSMUSG00000020315	Sptbn1	5.71414
ENSMUSG00000020319	Wdpcp	0.973537
ENSMUSG00000020321	Mdh1	0.755486
ENSMUSG00000020326	Ccng1	0.735357
ENSMUSG00000020328	Nudcd2	0.587441
ENSMUSG00000020329	Polrmt	1.97153
ENSMUSG00000020334	Slc22a4	1.68646
ENSMUSG00000020335	Zfp354b	2.13794
ENSMUSG00000020346	Mgat1	2.08259
ENSMUSG00000020349	Ppp2ca	0.735589
ENSMUSG00000020357	Flt4	1.97993
ENSMUSG00000020358	Hnrnpab	0.823578
ENSMUSG00000020359	Phykpl	1.13198
ENSMUSG00000020361	Hspa4	1.49048
ENSMUSG00000020362	Cnot6	1.2462
ENSMUSG00000020364	Zfp354a	1.85413
ENSMUSG00000020366	Mapk9	1.23219
ENSMUSG00000020368	Canx	1.35471
ENSMUSG00000020372	Gnb2l1	0.754627
ENSMUSG00000020375	Rufy1	1.78191
ENSMUSG00000020376	Rnf130	0.674766
ENSMUSG00000020377	Ltc4s	1.23469
ENSMUSG00000020380	Rad50	5.79927
ENSMUSG00000020381	3010026O09Rik	1.28731
ENSMUSG00000020385	Clk4	2.041
ENSMUSG00000020386	Sar1b	0.528386
ENSMUSG00000020387	Jade2	4.66863
ENSMUSG00000020388	Pdlim4	0.683859
ENSMUSG00000020390	Ube2b	0.812292
ENSMUSG00000020392	Cdkn2aipnl	1.05123
ENSMUSG00000020393	Kremen1	2.66204
ENSMUSG00000020397	Med7	0.776133
ENSMUSG00000020400	Tnip1	1.55584
ENSMUSG00000020402	Vdac1	0.790473
ENSMUSG00000020407	Upp1	2.16349
ENSMUSG00000020409	Slu7	3.31829
ENSMUSG00000020412	Ascc2	2.80085
ENSMUSG00000020413	Hus1	1.65588
ENSMUSG00000020415	Pttg1	0.722866
ENSMUSG00000020422	Tns3	2.58298
ENSMUSG00000020423	Btg2	2.5351
ENSMUSG00000020424	Gatsl3	1.26745
ENSMUSG00000020427	Igfbp3	1.62083
ENSMUSG00000020429	Igfbp1	3.31523
ENSMUSG00000020430	Pes1	2.10944
ENSMUSG00000020432	Tcn2	0.715142
ENSMUSG00000020437	Myo1g	2.96301
ENSMUSG00000020439	Smtn	3.0256
ENSMUSG00000020440	Arf5	0.857014
ENSMUSG00000020441	2310033P09Rik	5.169
ENSMUSG00000020444	Guk1	0.855812
ENSMUSG00000020448	Rnf185	1.82623
ENSMUSG00000020451	Limk2	1.99153
ENSMUSG00000020453	Patz1	2.39947
ENSMUSG00000020454	Eif4enif1	2.44633
ENSMUSG00000020455	Trim11	2.23818
ENSMUSG00000020456	Ogdh	1.16877
ENSMUSG00000020457	Drg1	0.898801
ENSMUSG00000020458	Rtn4	0.583374
ENSMUSG00000020459	Mtif2	1.22933
ENSMUSG00000020460	Rps27a	0.688922
ENSMUSG00000020462	Cfap36	2.31959
ENSMUSG00000020463	Smek2	1.5841
ENSMUSG00000020464	Pnpt1	0.869894
ENSMUSG00000020467	Efemp1	1.59822
ENSMUSG00000020471	Pold2	1.24106
ENSMUSG00000020472	Zkscan17	2.70476
ENSMUSG00000020474	Polm	1.86862
ENSMUSG00000020476	Dbnl	1.24078
ENSMUSG00000020477	Mrps24	0.538167
ENSMUSG00000020482	Ccdc117	2.05615
ENSMUSG00000020483	Dynll2	1.02363
ENSMUSG00000020484	Xbp1	1.12417
ENSMUSG00000020485	Supt4a	0.549927
ENSMUSG00000020486	43347	2.19285
ENSMUSG00000020491	2810021J22Rik	2.37567
ENSMUSG00000020492	Ska2	1.78614
ENSMUSG00000020493	Prr11	1.08264
ENSMUSG00000020495	Smg8	2.10392
ENSMUSG00000020496	Rnf187	1.00072
ENSMUSG00000020513	Tubd1	0.837057
ENSMUSG00000020514	Mrpl22	0.710586
ENSMUSG00000020515	Cnot8	1.66097
ENSMUSG00000020516	Rps6kb1	0.985658
ENSMUSG00000020519	Sap30l	1.24575
ENSMUSG00000020520	Galnt10	1.86341
ENSMUSG00000020521	Rnft1	0.670999
ENSMUSG00000020522	Mfap3	1.52588
ENSMUSG00000020523	Fam114a2	1.14053
ENSMUSG00000020525	Ppm1d	1.45009
ENSMUSG00000020526	Znhit3	0.770821
ENSMUSG00000020527	Myo19	2.33875
ENSMUSG00000020528	Prpsap2	1.17193
ENSMUSG00000020530	Ggnbp2	1.92009
ENSMUSG00000020532	Acaca	2.36273
ENSMUSG00000020534	Shmt1	0.967981
ENSMUSG00000020536	Llgl1	2.71772
ENSMUSG00000020537	Drg2	1.01481
ENSMUSG00000020538	Srebf1	2.65587
ENSMUSG00000020541	Tom1l1	0.930724
ENSMUSG00000020544	Cox11	0.991587
ENSMUSG00000020547	Bzw2	1.14601
ENSMUSG00000020549	Elac2	1.49885
ENSMUSG00000020553	Pctp	0.869716
ENSMUSG00000020561	Twistnb	2.11554
ENSMUSG00000020564	Atxn7l1	2.27313
ENSMUSG00000020570	Sypl	0.976481
ENSMUSG00000020571	Pdia6	1.14949
ENSMUSG00000020572	Nampt	0.951984
ENSMUSG00000020576	Nbas	2.10208
ENSMUSG00000020580	Rock2	3.9511
ENSMUSG00000020585	Laptm4a	0.574677
ENSMUSG00000020589	Fam49a	2.47856
ENSMUSG00000020590	Snx13	1.32804
ENSMUSG00000020592	Sdc1	1.08318
ENSMUSG00000020593	Lpin1	1.73058
ENSMUSG00000020594	Pum2	1.51568
ENSMUSG00000020601	Trib2	4.50666
ENSMUSG00000020604	Arsg	1.0146
ENSMUSG00000020605	Hs1bp3	1.35807
ENSMUSG00000020608	Smc6	1.88818
ENSMUSG00000020609	Apob	2.86179
ENSMUSG00000020610	Amz2	0.886492
ENSMUSG00000020611	Gna13	1.98531
ENSMUSG00000020612	Prkar1a	1.10086
ENSMUSG00000020614	Fam20a	1.40135
ENSMUSG00000020620	Abca8b	0.935885
ENSMUSG00000020621	Rdh14	0.601024
ENSMUSG00000020623	Map2k6	1.04818
ENSMUSG00000020628	Trappc12	1.28262
ENSMUSG00000020629	Adi1	0.535327
ENSMUSG00000020630	Rnaseh1	1.41273
ENSMUSG00000020633	Dcdc2c	4.11077
ENSMUSG00000020634	Ubxn2a	0.629684
ENSMUSG00000020638	Cmpk2	1.70108
ENSMUSG00000020640	Itsn2	2.45741
ENSMUSG00000020641	Rsad2	0.831045
ENSMUSG00000020642	Rnf144a	3.25802
ENSMUSG00000020644	Id2	5.58127
ENSMUSG00000020647	Ncoa1	3.14661
ENSMUSG00000020648	Dus4l	1.74044
ENSMUSG00000020649	Rrm2	0.669046
ENSMUSG00000020650	Bcap29	0.923432
ENSMUSG00000020652	Cenpo	1.33717
ENSMUSG00000020653	Klf11	2.1412
ENSMUSG00000020659	Cbll1	1.72902
ENSMUSG00000020661	Dnmt3a	3.37613
ENSMUSG00000020664	Dld	0.857025
ENSMUSG00000020668	Kif3c	1.55083
ENSMUSG00000020669	Sh3yl1	0.843904
ENSMUSG00000020671	Rab10	0.94776
ENSMUSG00000020672	Sntg2	0.995849
ENSMUSG00000020674	Pxdn	2.16602
ENSMUSG00000020677	Ddx52	1.31198
ENSMUSG00000020679	Hnf1b	2.78488
ENSMUSG00000020680	Taf15	1.50584
ENSMUSG00000020687	Cdc27	1.06009
ENSMUSG00000020689	Itgb3	2.83096
ENSMUSG00000020691	Mettl2	1.19562
ENSMUSG00000020692	Nle1	1.94394
ENSMUSG00000020694	Tlk2	3.45915
ENSMUSG00000020696	Rffl	2.192
ENSMUSG00000020697	Lig3	1.52664
ENSMUSG00000020700	Map3k3	1.10439
ENSMUSG00000020701	Tmem132e	3.07353
ENSMUSG00000020705	Ddx42	1.36587
ENSMUSG00000020706	Ftsj3	2.43557
ENSMUSG00000020707	Rnf135	1.79911
ENSMUSG00000020708	Psmc5	0.998628
ENSMUSG00000020709	Adap2	2.33431
ENSMUSG00000020715	Ern1	2.31013
ENSMUSG00000020716	Nf1	1.97569
ENSMUSG00000020717	Pecam1	1.22842
ENSMUSG00000020718	Polg2	1.19694
ENSMUSG00000020719	Ddx5	1.17964
ENSMUSG00000020720	Psmd12	0.896036
ENSMUSG00000020721	Helz	3.5369
ENSMUSG00000020733	Slc9a3r1	1.32353
ENSMUSG00000020736	Nt5c	0.861164
ENSMUSG00000020737	Hn1	0.99531
ENSMUSG00000020738	Sumo2	0.645725
ENSMUSG00000020739	Nup85	1.35065
ENSMUSG00000020740	Gga3	2.68434
ENSMUSG00000020741	Cluh	1.7729
ENSMUSG00000020743	Mif4gd	1.87997
ENSMUSG00000020744	Slc25a19	1.46016
ENSMUSG00000020745	Pafah1b1	1.18906
ENSMUSG00000020747	2310067B10Rik	2.38745
ENSMUSG00000020752	Recql5	1.91142
ENSMUSG00000020755	Sap30bp	1.39052
ENSMUSG00000020766	Galk1	0.93526
ENSMUSG00000020770	Unk	2.09292
ENSMUSG00000020773	Trim47	2.09262
ENSMUSG00000020774	Aspa	1.39675
ENSMUSG00000020775	Mrpl38	1.16547
ENSMUSG00000020776	Fbf1	3.17636
ENSMUSG00000020777	Acox1	0.976006
ENSMUSG00000020778	Ten1	0.694803
ENSMUSG00000020780	Srp68	1.55233
ENSMUSG00000020781	Tsen54	1.52788
ENSMUSG00000020782	Llgl2	2.07651
ENSMUSG00000020783	1200014J11Rik	2.01667
ENSMUSG00000020790	Ankfy1	1.71622
ENSMUSG00000020792	Exoc7	1.4154
ENSMUSG00000020794	Ube2g1	1.08672
ENSMUSG00000020801	Med31	1.29854
ENSMUSG00000020802	Ube2o	3.43623
ENSMUSG00000020803	Txndc17	0.391042
ENSMUSG00000020806	Rhbdf2	3.11687
ENSMUSG00000020807	4933427D14Rik	3.02767
ENSMUSG00000020810	Cygb	1.7826
ENSMUSG00000020812	1810032O08Rik	1.29974
ENSMUSG00000020814	Mxra7	1.81025
ENSMUSG00000020817	Rabep1	2.4739
ENSMUSG00000020818	Mfsd11	1.92286
ENSMUSG00000020821	Kif1c	2.4144
ENSMUSG00000020823	Sec14l1	2.28448
ENSMUSG00000020827	Mink1	3.14381
ENSMUSG00000020828	Pld2	2.38492
ENSMUSG00000020829	Slc46a1	0.778962
ENSMUSG00000020830	Vmo1	0.664333
ENSMUSG00000020831	0610010K14Rik	2.05339
ENSMUSG00000020832	Eral1	0.96095
ENSMUSG00000020834	Dhrs13	1.22469
ENSMUSG00000020840	Blmh	1.07428
ENSMUSG00000020841	Cpd	1.79165
ENSMUSG00000020843	Timm22	0.713913
ENSMUSG00000020844	Nxn	1.38472
ENSMUSG00000020846	Fam101b	2.26912
ENSMUSG00000020847	Rph3al	1.08232
ENSMUSG00000020849	Ywhae	0.793617
ENSMUSG00000020850	Prpf8	2.12215
ENSMUSG00000020857	Nme2	0.377183
ENSMUSG00000020859	Spag9	1.92257
ENSMUSG00000020863	Luc7l3	2.32388
ENSMUSG00000020864	Ankrd40	1.27302
ENSMUSG00000020865	Abcc3	1.42237
ENSMUSG00000020868	Xylt2	2.89126
ENSMUSG00000020869	Lrrc59	1.20931
ENSMUSG00000020870	Cdc34-ps	1.18852
ENSMUSG00000020873	Slc35b1	0.714821
ENSMUSG00000020876	Snx11	1.41069
ENSMUSG00000020877	Scrn2	1.21635
ENSMUSG00000020878	Lrrc46	1.01086
ENSMUSG00000020883	Fbxl20	1.96105
[truncated: 9,667 more rows]
