# Supplementary material for: The CCR4–NOT complex maintains liver homeostasis through mRNA deadenylation
Source: Life Sci Alliance. 2020 Apr 1;3(5):e201900494. doi: 10.26508/lsa.201900494 (PMC7119370; doi:10.26508/lsa.201900494)
Supplement: Supplementary file 4 [file LSA-2019-00494_TableS4.xlsx]

## Sheet: Sheet1
Table S4. mRNA half-lives in livers from control mice. Half-lives of mRNAs were calculated using the results of RNA-seq of livers from control mice that were treated with Act. D. (See the Materials and Methods section for details.) and shown in the lists. Ensemble gene IDs and gene symbols are also shown.
FPKMs in livers from control mice
Ensembl ID	Gene Symbol	FPKM
ENSMUSG00000000001	Gnai3	24.669
ENSMUSG00000000028	Cdc45	0.499882
ENSMUSG00000000037	Scml2	0.00660299
ENSMUSG00000000049	Apoh	1336.32
ENSMUSG00000000056	Narf	5.68787
ENSMUSG00000000058	Cav2	1.51148
ENSMUSG00000000078	Klf6	2.11502
ENSMUSG00000000085	Scmh1	0.725136
ENSMUSG00000000088	Cox5a	185.117
ENSMUSG00000000093	Tbx2	0.7852
ENSMUSG00000000120	Ngfr	0.835798
ENSMUSG00000000126	Wnt9a	0.128249
ENSMUSG00000000127	Fer	1.51807
ENSMUSG00000000131	Xpo6	3.33707
ENSMUSG00000000134	Tfe3	2.51531
ENSMUSG00000000142	Axin2	1.03412
ENSMUSG00000000148	Brat1	1.4076
ENSMUSG00000000149	Gna12	19.7228
ENSMUSG00000000154	Slc22a18	42.1204
ENSMUSG00000000157	Itgb2l	0.0878349
ENSMUSG00000000159	Igsf5	6.80601
ENSMUSG00000000167	Pih1d2	0.153112
ENSMUSG00000000168	Dlat	7.58443
ENSMUSG00000000171	Sdhd	139.055
ENSMUSG00000000184	Ccnd2	1.07625
ENSMUSG00000000194	Gpr107	1.43778
ENSMUSG00000000244	Tspan32	0.0809884
ENSMUSG00000000247	Lhx2	0.509386
ENSMUSG00000000253	Gmpr	0.453209
ENSMUSG00000000266	Mid2	0.832782
ENSMUSG00000000275	Trim25	20.2964
ENSMUSG00000000276	Dgke	0.267395
ENSMUSG00000000278	Scpep1	18.049
ENSMUSG00000000282	Mnt	2.50593
ENSMUSG00000000290	Itgb2	4.0814
ENSMUSG00000000295	Hddc2	0.242525
ENSMUSG00000000296	Tpd52l1	3.58315
ENSMUSG00000000301	Pemt	25.9066
ENSMUSG00000000303	Cdh1	5.64618
ENSMUSG00000000305	Cdh4	0.121901
ENSMUSG00000000317	Bcl6b	0.468494
ENSMUSG00000000318	Clec10a	0.11756
ENSMUSG00000000320	Alox12	0.0847381
ENSMUSG00000000325	Arvcf	1.82228
ENSMUSG00000000326	Comt	107.296
ENSMUSG00000000339	Rtca	2.25178
ENSMUSG00000000340	Dbt	25.6006
ENSMUSG00000000346	Dazap2	49.6351
ENSMUSG00000000355	Mcts1	9.37487
ENSMUSG00000000359	Rem1	0.110474
ENSMUSG00000000365	Rnf17	0.0151173
ENSMUSG00000000374	Trappc10	5.88561
ENSMUSG00000000378	Ccm2	3.87976
ENSMUSG00000000384	Tbrg4	6.97336
ENSMUSG00000000385	Tmprss2	3.91253
ENSMUSG00000000386	Mx1	0.27948
ENSMUSG00000000399	Ndufa9	52.585
ENSMUSG00000000409	Lck	0.315066
ENSMUSG00000000416	Cttnbp2	0.0159881
ENSMUSG00000000420	Galnt1	7.69214
ENSMUSG00000000439	Mkrn2	4.32313
ENSMUSG00000000440	Pparg	1.4414
ENSMUSG00000000441	Raf1	6.54869
ENSMUSG00000000486	42979	0.411075
ENSMUSG00000000489	Pdgfb	0.310431
ENSMUSG00000000530	Acvrl1	0.958902
ENSMUSG00000000531	Grasp	0.574615
ENSMUSG00000000532	Acvr1b	2.57652
ENSMUSG00000000538	Tom1l2	3.31407
ENSMUSG00000000552	Zfp385a	5.0283
ENSMUSG00000000555	Itga5	6.69538
ENSMUSG00000000560	Gabra2	0.0132378
ENSMUSG00000000561	Wdr77	3.16938
ENSMUSG00000000563	Atp5f1	56.5429
ENSMUSG00000000567	Sox9	0.888163
ENSMUSG00000000568	Hnrnpd	2.58859
ENSMUSG00000000579	Dynlt1c	0.916904
ENSMUSG00000000581	C1d	6.22949
ENSMUSG00000000594	Gm2a	33.6045
ENSMUSG00000000600	Krit1	1.23169
ENSMUSG00000000605	Clcn4-2	12.8683
ENSMUSG00000000628	Hk2	0.441729
ENSMUSG00000000631	Myo18a	9.33242
ENSMUSG00000000673	Haao	267.942
ENSMUSG00000000682	Cd52	4.80847
ENSMUSG00000000686	Abhd15	10.1803
ENSMUSG00000000690	Hoxb6	0.0267763
ENSMUSG00000000693	Loxl3	0.67539
ENSMUSG00000000708	Kat2b	13.8406
ENSMUSG00000000711	Rab5b	27.1617
ENSMUSG00000000732	Icosl	1.26139
ENSMUSG00000000738	Spg7	8.9257
ENSMUSG00000000739	Sult5a1	9.31778
ENSMUSG00000000740	Rpl13	12.6081
ENSMUSG00000000743	Chmp1a	15.9538
ENSMUSG00000000751	Rpa1	3.57439
ENSMUSG00000000753	Serpinf1	243.281
ENSMUSG00000000759	Tubgcp3	1.52268
ENSMUSG00000000776	Polr3d	2.03456
ENSMUSG00000000782	Tcf7	1.0298
ENSMUSG00000000787	Ddx3x	40.6551
ENSMUSG00000000791	Il12rb1	0.167239
ENSMUSG00000000804	Usp32	4.14906
ENSMUSG00000000811	Txnrd3	1.63713
ENSMUSG00000000817	Fasl	0.0716104
ENSMUSG00000000823	Znf512b	2.87125
ENSMUSG00000000826	Dnajc5	8.302
ENSMUSG00000000827	Tpd52l2	4.58489
ENSMUSG00000000838	Fmr1	2.33548
ENSMUSG00000000861	Bcl11a	0.0114746
ENSMUSG00000000876	Pxmp4	46.1747
ENSMUSG00000000881	Dlg3	3.28579
ENSMUSG00000000884	Gnb1l	0.118585
ENSMUSG00000000901	Mmp11	0.072331
ENSMUSG00000000902	Smarcb1	1.73869
ENSMUSG00000000903	Vpreb3	0.985864
ENSMUSG00000000915	Hip1r	3.92712
ENSMUSG00000000916	Nsun5	1.70465
ENSMUSG00000000934	Top1mt	7.94923
ENSMUSG00000000942	Hoxa4	0.18065
ENSMUSG00000000948	Gm38393	0.29246
ENSMUSG00000000957	Mmp14	10.487
ENSMUSG00000000958	Slc7a7	1.09246
ENSMUSG00000000959	Oxa1l	5.43125
ENSMUSG00000000976	Heatr6	1.93655
ENSMUSG00000000983	Wfdc18	0.0951502
ENSMUSG00000001014	Icam4	0.15368
ENSMUSG00000001016	Ilf2	1.18616
ENSMUSG00000001017	Chtop	11.1976
ENSMUSG00000001018	Snapin	3.4613
ENSMUSG00000001020	S100a4	0.156029
ENSMUSG00000001021	S100a3	0.0181776
ENSMUSG00000001025	S100a6	0.558252
ENSMUSG00000001029	Icam2	1.28249
ENSMUSG00000001034	Mapk7	0.553268
ENSMUSG00000001036	Epn2	1.67965
ENSMUSG00000001039	B9d1	0.124306
ENSMUSG00000001052	Sec24b	4.34024
ENSMUSG00000001053	N4bp3	1.04411
ENSMUSG00000001054	Rmnd5b	3.95021
ENSMUSG00000001056	Nhp2	9.66966
ENSMUSG00000001062	Vps9d1	3.42901
ENSMUSG00000001065	Zfp276	5.36238
ENSMUSG00000001082	Mfsd10	1.21243
ENSMUSG00000001089	Luzp1	2.22145
ENSMUSG00000001095	Slc13a2	1.0893
ENSMUSG00000001098	Kctd10	2.76793
ENSMUSG00000001100	Poldip2	16.4545
ENSMUSG00000001103	Sebox	0.367134
ENSMUSG00000001105	Ift20	17.2758
ENSMUSG00000001119	Col6a1	1.3751
ENSMUSG00000001120	Pcbp3	0.200789
ENSMUSG00000001123	Lgals9	146.14
ENSMUSG00000001127	Araf	8.34134
ENSMUSG00000001128	Cfp	23.5541
ENSMUSG00000001134	Uxt	5.175
ENSMUSG00000001138	Cnnm3	2.41921
ENSMUSG00000001143	Lman2l	1.77714
ENSMUSG00000001150	Mcm3ap	3.50706
ENSMUSG00000001151	Pcnt	1.26071
ENSMUSG00000001155	Ftcd	111.207
ENSMUSG00000001156	Mxd1	0.756579
ENSMUSG00000001157	Gmcl1	1.04905
ENSMUSG00000001158	Snrnp27	3.6865
ENSMUSG00000001166	Oas1c	0.258322
ENSMUSG00000001173	Ocrl	0.589842
ENSMUSG00000001175	Calm1	26.1823
ENSMUSG00000001211	Agpat3	32.8927
ENSMUSG00000001227	Sema6b	1.38164
ENSMUSG00000001228	Uhrf1	0.166809
ENSMUSG00000001229	Dpp9	17.8037
ENSMUSG00000001240	Ramp2	14.2784
ENSMUSG00000001247	Lsr	67.718
ENSMUSG00000001248	Gramd1a	2.23175
ENSMUSG00000001249	Hpn	85.0771
ENSMUSG00000001270	Ckb	2.70319
ENSMUSG00000001280	Sp1	5.10443
ENSMUSG00000001281	Itgb7	0.54071
ENSMUSG00000001285	Myg1	3.45311
ENSMUSG00000001288	Rarg	2.04164
ENSMUSG00000001289	Pfdn5	32.0348
ENSMUSG00000001300	Efnb2	1.19866
ENSMUSG00000001305	Rrp15	1.90028
ENSMUSG00000001313	Rnd2	11.5433
ENSMUSG00000001323	Srr	13.1123
ENSMUSG00000001348	Acp5	68.7025
ENSMUSG00000001366	Fbxo9	14.7736
ENSMUSG00000001376	Ccdc132	0.867787
ENSMUSG00000001380	Hars	12.6099
ENSMUSG00000001383	Zmat2	9.23043
ENSMUSG00000001403	Ube2c	0.166065
ENSMUSG00000001415	Smg5	4.81035
ENSMUSG00000001416	Cct3	11.5337
ENSMUSG00000001418	Glmp	7.02473
ENSMUSG00000001419	Mef2d	5.72657
ENSMUSG00000001420	Tmem79	0.423041
ENSMUSG00000001424	Snd1	14.5062
ENSMUSG00000001435	Col18a1	129.986
ENSMUSG00000001436	Slc19a1	2.20577
ENSMUSG00000001440	Kpnb1	17.6162
ENSMUSG00000001441	Npepps	3.33064
ENSMUSG00000001444	Tbx21	0.115192
ENSMUSG00000001445	Mrpl10	16.4627
ENSMUSG00000001467	Cyp51	19.3666
ENSMUSG00000001472	Tcf25	29.1873
ENSMUSG00000001473	Tubb6	4.47634
ENSMUSG00000001482	Def8	10.7373
ENSMUSG00000001497	Pax9	0.0390962
ENSMUSG00000001506	Col1a1	0.519867
ENSMUSG00000001507	Itga3	1.22236
ENSMUSG00000001517	Foxm1	0.111085
ENSMUSG00000001518	Itfg2	1.06956
ENSMUSG00000001520	Nrip2	0.0712026
ENSMUSG00000001521	Tulp3	0.156726
ENSMUSG00000001524	Gtf2h4	2.48584
ENSMUSG00000001525	Tubb5	12.5145
ENSMUSG00000001542	Ell2	19.4141
ENSMUSG00000001552	Jup	8.98843
ENSMUSG00000001555	Fkbp10	0.238907
ENSMUSG00000001569	Nom1	3.10797
ENSMUSG00000001576	Ergic1	8.75287
ENSMUSG00000001583	Tnk1	0.0209457
ENSMUSG00000001588	Acap1	0.44009
ENSMUSG00000001604	Tcea3	22.1897
ENSMUSG00000001622	Csn3	0.0228997
ENSMUSG00000001627	Ifrd1	1.91501
ENSMUSG00000001630	Stk38l	3.44237
ENSMUSG00000001632	Brpf1	2.26114
ENSMUSG00000001642	Akr1b3	0.261006
ENSMUSG00000001663	Gstt1	173.85
ENSMUSG00000001665	Gstt3	41.2136
ENSMUSG00000001666	Ddt	292.481
ENSMUSG00000001670	Tat	866.524
ENSMUSG00000001672	Marveld3	0.25672
ENSMUSG00000001674	Ddx18	5.02965
ENSMUSG00000001687	Ubl3	5.90791
ENSMUSG00000001700	Gramd3	10.1312
ENSMUSG00000001707	Eef1e1	5.20751
ENSMUSG00000001729	Akt1	13.2679
ENSMUSG00000001739	Cldn15	0.132537
ENSMUSG00000001741	Il16	0.334889
ENSMUSG00000001750	Tcirg1	7.91425
ENSMUSG00000001751	Naglu	8.94512
ENSMUSG00000001755	Coasy	27.5878
ENSMUSG00000001761	Smo	0.469708
ENSMUSG00000001763	Tspan33	1.49262
ENSMUSG00000001767	Crnkl1	2.89077
ENSMUSG00000001768	Rin2	3.57713
ENSMUSG00000001774	Chordc1	14.1572
ENSMUSG00000001783	Rtcb	17.273
ENSMUSG00000001785	Pwp1	4.38228
ENSMUSG00000001786	Fbxo7	2.19373
ENSMUSG00000001794	Capns1	32.7422
ENSMUSG00000001802	Lrp3	3.94422
ENSMUSG00000001829	Clpb	3.57893
ENSMUSG00000001833	42985	14.9822
ENSMUSG00000001844	Zdhhc4	4.29226
ENSMUSG00000001847	Rac1	23.3648
ENSMUSG00000001855	Nup214	1.68365
ENSMUSG00000001870	Ltbp1	0.327855
ENSMUSG00000001891	Ugp2	71.7165
ENSMUSG00000001909	Trmt1	3.84926
ENSMUSG00000001910	Nacc1	6.69076
ENSMUSG00000001911	Nfix	7.04428
ENSMUSG00000001918	Slc1a5	2.13543
ENSMUSG00000001924	Uba1	34.9746
ENSMUSG00000001930	Vwf	0.46668
ENSMUSG00000001942	Siae	8.60464
ENSMUSG00000001943	Vsig2	0.441388
ENSMUSG00000001946	Esam	5.35935
ENSMUSG00000001948	Spa17	0.292791
ENSMUSG00000001962	Fam50a	5.58702
ENSMUSG00000001964	Emd	4.14927
ENSMUSG00000001983	Taco1	7.99937
ENSMUSG00000001986	Gria3	0.0549951
ENSMUSG00000001988	Npas1	0.0393192
ENSMUSG00000001995	Sipa1l2	0.557508
ENSMUSG00000001998	Ap4e1	0.628278
ENSMUSG00000001999	Blvra	3.34432
ENSMUSG00000002006	Pdzd4	0.0712833
ENSMUSG00000002010	Idh3g	15.7214
ENSMUSG00000002014	Ssr4	17.7837
ENSMUSG00000002015	Bcap31	76.7013
ENSMUSG00000002017	Fam98a	5.70859
ENSMUSG00000002020	Ltbp2	0.0547058
ENSMUSG00000002028	Kmt2a	1.8373
ENSMUSG00000002031	Ift46	2.71321
ENSMUSG00000002032	Tmem25	19.5829
ENSMUSG00000002033	Cd3g	0.487216
ENSMUSG00000002043	Trappc6a	6.61902
ENSMUSG00000002052	Supt6	7.87226
ENSMUSG00000002055	Spag5	0.0634657
ENSMUSG00000002058	Unc119	1.41452
ENSMUSG00000002059	Rab34	0.61674
ENSMUSG00000002064	Sdf2	15.1597
ENSMUSG00000002068	Ccne1	0.192775
ENSMUSG00000002083	Bbc3	1.75489
ENSMUSG00000002100	Mybpc3	0.0167172
ENSMUSG00000002102	Psmc3	24.9626
ENSMUSG00000002103	Acp2	8.79867
ENSMUSG00000002104	Rapsn	0.0291686
ENSMUSG00000002105	Slc39a13	1.49929
ENSMUSG00000002107	Celf2	0.340388
ENSMUSG00000002108	Nr1h3	34.1202
ENSMUSG00000002109	Ddb2	1.23604
ENSMUSG00000002111	Spi1	2.66546
ENSMUSG00000002129	Sf3a1	3.7237
ENSMUSG00000002147	Stat6	10.5615
ENSMUSG00000002204	Napsa	0.109879
ENSMUSG00000002205	Vrk3	6.0419
ENSMUSG00000002210	Smg9	1.89269
ENSMUSG00000002221	Paxip1	1.57284
ENSMUSG00000002222	Rmnd5a	23.6024
ENSMUSG00000002227	Mov10	2.4025
ENSMUSG00000002228	Ppm1j	0.0842542
ENSMUSG00000002233	Rhoc	2.74045
ENSMUSG00000002249	Tead3	1.78383
ENSMUSG00000002250	Ppard	2.41082
ENSMUSG00000002257	Def6	0.0949449
ENSMUSG00000002265	Peg3	1.28502
ENSMUSG00000002266	Zim1	0.0102132
ENSMUSG00000002274	Metrn	1.63534
ENSMUSG00000002279	Lmf1	3.04453
ENSMUSG00000002280	Narfl	4.13071
ENSMUSG00000002289	Angptl4	54.1884
ENSMUSG00000002297	Dbf4	0.201936
ENSMUSG00000002307	Daxx	2.8966
ENSMUSG00000002308	Cd320	1.08201
ENSMUSG00000002319	Ipo4	5.93455
ENSMUSG00000002320	Tm9sf1	11.0255
ENSMUSG00000002324	Rec8	0.50732
ENSMUSG00000002325	Irf9	4.997
ENSMUSG00000002326	Gmpr2	5.88135
ENSMUSG00000002329	Mdp1	4.5086
ENSMUSG00000002332	Dhrs1	30.7726
ENSMUSG00000002342	Tmem161a	3.0763
ENSMUSG00000002343	Armc6	1.18214
ENSMUSG00000002345	2310045N01Rik	3.34807
ENSMUSG00000002346	Slc25a42	18.2723
ENSMUSG00000002365	Snx9	13.3914
ENSMUSG00000002372	Ranbp3	9.8603
ENSMUSG00000002379	Ndufa11	13.8763
ENSMUSG00000002384	Bmp8b	0.0343036
ENSMUSG00000002393	Nr2f6	11.5094
ENSMUSG00000002395	Use1	12.704
ENSMUSG00000002396	Ocel1	3.64202
ENSMUSG00000002409	Dyrk1b	3.09559
ENSMUSG00000002413	Braf	1.7577
ENSMUSG00000002416	Ndufb2	4.36062
ENSMUSG00000002428	Hltf	1.32153
ENSMUSG00000002455	Prpf6	12.2579
ENSMUSG00000002458	Rgs19	0.968541
ENSMUSG00000002475	Abhd3	27.5117
ENSMUSG00000002477	Snrpd1	6.12518
ENSMUSG00000002486	Tchp	0.223795
ENSMUSG00000002489	Tiam1	0.0486147
ENSMUSG00000002496	Tsc2	7.46655
ENSMUSG00000002504	Slc9a3r2	7.73686
ENSMUSG00000002524	Puf60	20.7019
ENSMUSG00000002546	Golga2	6.16422
ENSMUSG00000002550	Uck1	17.7508
ENSMUSG00000002578	Ikzf4	0.508212
ENSMUSG00000002580	Mien1	35.2781
ENSMUSG00000002588	Pon1	201.824
ENSMUSG00000002602	Axl	8.26565
ENSMUSG00000002603	Tgfb1	2.898
ENSMUSG00000002608	Ccdc97	5.06387
ENSMUSG00000002617	Zfp40	0.486443
ENSMUSG00000002625	Akap8l	10.3058
ENSMUSG00000002633	Shh	0.0441161
ENSMUSG00000002635	Pdcd2l	3.07224
ENSMUSG00000002658	Gtf2f1	8.47961
ENSMUSG00000002660	Clpp	19.9225
ENSMUSG00000002661	Alkbh7	3.94853
ENSMUSG00000002668	Dennd1c	0.686414
ENSMUSG00000002679	Med6	3.87425
ENSMUSG00000002688	Prkd1	0.0251871
ENSMUSG00000002699	Lcp2	1.77509
ENSMUSG00000002718	Cse1l	5.5973
ENSMUSG00000002728	Naa20	2.31508
ENSMUSG00000002731	Prkra	4.70164
ENSMUSG00000002732	Fkbp7	1.52659
ENSMUSG00000002733	Plekha3	5.58246
ENSMUSG00000002741	Ykt6	16.4367
ENSMUSG00000002748	Baz1b	5.24973
ENSMUSG00000002763	Pex6	17.2889
ENSMUSG00000002767	Mrpl2	16.8324
ENSMUSG00000002768	Mea1	29.6437
ENSMUSG00000002769	Gnmt	1051.32
ENSMUSG00000002771	Grin2d	0.0196571
ENSMUSG00000002778	Kdelr1	38.227
ENSMUSG00000002781	Tmem143	2.4735
ENSMUSG00000002797	Ggct	3.41592
ENSMUSG00000002799	Jag2	0.021661
ENSMUSG00000002803	Btbd6	4.88926
ENSMUSG00000002804	Nudt14	7.55872
ENSMUSG00000002808	Epdr1	0.153364
ENSMUSG00000002812	Flii	9.3115
ENSMUSG00000002814	Top3a	1.23594
ENSMUSG00000002820	Atg4d	9.96284
ENSMUSG00000002825	Qtrt1	1.20635
ENSMUSG00000002831	Plin4	4.09644
ENSMUSG00000002833	Hdgfrp2	8.21769
ENSMUSG00000002835	Chaf1a	0.297312
ENSMUSG00000002844	Adprh	2.86451
ENSMUSG00000002845	Tmem39a	1.51522
ENSMUSG00000002846	Timmdc1	9.3927
ENSMUSG00000002847	Pla1a	23.6133
ENSMUSG00000002870	Mcm2	0.274012
ENSMUSG00000002871	Tpra1	3.47716
ENSMUSG00000002881	Nab1	9.46559
ENSMUSG00000002885	Adgre5	8.45509
ENSMUSG00000002897	Il17ra	6.23718
ENSMUSG00000002900	Lamb1	0.897616
ENSMUSG00000002908	Kcnn1	0.953577
ENSMUSG00000002910	Arrdc2	5.3596
ENSMUSG00000002944	Cd36	35.2528
ENSMUSG00000002948	Map2k7	6.24213
ENSMUSG00000002949	Timm44	8.0126
ENSMUSG00000002957	Ap2a2	17.8756
ENSMUSG00000002963	Pnkp	4.07615
ENSMUSG00000002968	Med25	9.51969
ENSMUSG00000002980	Bcam	1.04069
ENSMUSG00000002981	Clptm1	21.5492
ENSMUSG00000002983	Relb	0.356916
ENSMUSG00000002984	Tomm40	4.77313
ENSMUSG00000002985	Apoe	6832.96
ENSMUSG00000002992	Apoc2	241.076
ENSMUSG00000002996	Hbp1	12.8046
ENSMUSG00000002997	Prkar2b	0.0901697
ENSMUSG00000003031	Cdkn1b	4.06697
ENSMUSG00000003032	Klf4	0.437111
ENSMUSG00000003033	Ap1m1	7.71446
ENSMUSG00000003037	Rab8a	9.73378
ENSMUSG00000003038	Hmgn2	3.30986
ENSMUSG00000003039	Fam32a	15.4427
ENSMUSG00000003051	Elf3	0.106016
ENSMUSG00000003053	Cyp2c29	167.922
ENSMUSG00000003062	Stard3nl	0.985184
ENSMUSG00000003068	Stk11	11.6908
ENSMUSG00000003072	Atp5d	92.0406
ENSMUSG00000003099	Ppp5c	11.4397
ENSMUSG00000003119	Cdk12	1.78102
ENSMUSG00000003123	Lipe	3.57808
ENSMUSG00000003131	Pafah1b2	6.50278
ENSMUSG00000003134	Tbc1d8	6.08706
ENSMUSG00000003135	Cnot11	3.97523
ENSMUSG00000003153	Slc2a3	0.115912
ENSMUSG00000003154	Foxj2	2.23281
ENSMUSG00000003161	Sri	3.19864
ENSMUSG00000003166	Dgcr2	8.58871
ENSMUSG00000003184	Irf3	10.8374
ENSMUSG00000003190	Bcl2l12	1.15071
ENSMUSG00000003198	Zfp959	2.15531
ENSMUSG00000003199	Mpnd	23.3264
ENSMUSG00000003200	Sh3gl1	6.4171
ENSMUSG00000003206	Ebi3	0.839314
ENSMUSG00000003208	Ccdc94	2.28179
ENSMUSG00000003226	Ranbp2	9.83475
ENSMUSG00000003228	Grk5	0.995772
ENSMUSG00000003233	Dvl3	2.28756
ENSMUSG00000003234	Abcf3	8.77777
ENSMUSG00000003235	Eif2b5	10.5177
ENSMUSG00000003269	Cyth2	4.23467
ENSMUSG00000003273	Car11	0.146604
ENSMUSG00000003279	Dlgap1	0.0892903
ENSMUSG00000003282	Plag1	0.0490756
ENSMUSG00000003283	Hck	3.6162
ENSMUSG00000003299	Mrpl4	14.1664
ENSMUSG00000003308	Keap1	8.24446
ENSMUSG00000003309	Ap1m2	0.0617826
ENSMUSG00000003316	Glg1	7.05466
ENSMUSG00000003344	Btbd2	4.46657
ENSMUSG00000003345	Csnk1g2	17.6511
ENSMUSG00000003346	Abhd17a	24.7633
ENSMUSG00000003348	Mob3a	1.0118
ENSMUSG00000003352	Cacnb3	0.079156
ENSMUSG00000003355	Fkbp11	5.07145
ENSMUSG00000003360	Ddx23	7.52014
ENSMUSG00000003363	Pld3	6.83041
ENSMUSG00000003378	Grik5	1.84261
ENSMUSG00000003379	Cd79a	0.226422
ENSMUSG00000003380	Rabac1	40.8059
ENSMUSG00000003382	Etv3	1.67534
ENSMUSG00000003402	Prkcsh	48.1084
ENSMUSG00000003411	Rab3b	0.132701
ENSMUSG00000003420	Fcgrt	85.4348
ENSMUSG00000003421	Nosip	4.03273
ENSMUSG00000003423	Pih1d1	11.2997
ENSMUSG00000003429	Rps11	215.561
ENSMUSG00000003435	Supt5	15.6035
ENSMUSG00000003437	Paf1	6.02701
ENSMUSG00000003438	Timm50	8.49411
ENSMUSG00000003444	Med29	7.47224
ENSMUSG00000003452	Bicd1	0.0556571
ENSMUSG00000003458	Ncstn	11.9756
ENSMUSG00000003464	Pex19	23.1767
ENSMUSG00000003469	Phyhip	0.0216655
ENSMUSG00000003477	Inmt	420.063
ENSMUSG00000003484	Cyp4f18	0.180351
ENSMUSG00000003500	Impdh1	0.792828
ENSMUSG00000003518	Dusp3	11.9891
ENSMUSG00000003526	Prodh	62.6018
ENSMUSG00000003527	Dgcr14	1.62105
ENSMUSG00000003528	Slc25a1	59.17
ENSMUSG00000003531	Dgcr6	9.12498
ENSMUSG00000003534	Ddr1	0.232998
ENSMUSG00000003541	Ier3	0.641768
ENSMUSG00000003545	Fosb	0.0256627
ENSMUSG00000003546	Klc4	25.9296
ENSMUSG00000003549	Ercc1	0.729462
ENSMUSG00000003555	Cyp17a1	133.864
ENSMUSG00000003559	As3mt	39.5778
ENSMUSG00000003573	Homer3	1.02652
ENSMUSG00000003575	Crtc1	0.759182
ENSMUSG00000003581	Rnf215	4.46312
ENSMUSG00000003585	Sec14l2	142.599
ENSMUSG00000003604	Aven	1.98742
ENSMUSG00000003617	Cp	123.585
ENSMUSG00000003623	Crot	64.5899
ENSMUSG00000003644	Rps6ka1	2.21532
ENSMUSG00000003660	Snrnp200	9.44928
ENSMUSG00000003662	Ciao1	9.72011
ENSMUSG00000003680	Taf6l	1.52519
ENSMUSG00000003721	Insig2	133.355
ENSMUSG00000003731	Kpna6	7.42761
ENSMUSG00000003746	Man1a	27.7833
ENSMUSG00000003752	Itpkc	1.79305
ENSMUSG00000003762	Adck4	3.18748
ENSMUSG00000003778	Brd8	1.17715
ENSMUSG00000003779	Kif20a	0.300796
ENSMUSG00000003808	Farsa	3.27276
ENSMUSG00000003809	Gcdh	146.644
ENSMUSG00000003810	Mast2	2.13048
ENSMUSG00000003812	Dnase2a	2.25987
ENSMUSG00000003813	Rad23a	14.1749
ENSMUSG00000003814	Calr	163.814
ENSMUSG00000003824	Syce2	1.06452
ENSMUSG00000003847	Nfat5	2.3031
ENSMUSG00000003848	Nob1	2.39278
ENSMUSG00000003849	Nqo1	5.88542
ENSMUSG00000003865	Gys1	0.496362
ENSMUSG00000003868	Ruvbl2	3.35882
ENSMUSG00000003873	Bax	9.23864
ENSMUSG00000003882	Il7r	0.10304
ENSMUSG00000003923	Tfam	11.8729
ENSMUSG00000003929	Zfp81	0.369939
ENSMUSG00000003934	Efnb3	0.0634359
ENSMUSG00000003948	Mmd	33.9739
ENSMUSG00000003949	Hlf	8.79244
ENSMUSG00000003955	Fam162a	35.1802
ENSMUSG00000003970	Rpl8	267.078
ENSMUSG00000003992	Ssbp2	0.633254
ENSMUSG00000004018	Fancl	1.01867
ENSMUSG00000004032	Gstm5	4.58471
ENSMUSG00000004035	Gstm7	24.6815
ENSMUSG00000004038	Gstm3	23.183
ENSMUSG00000004040	Stat3	13.8386
ENSMUSG00000004043	Stat5a	3.18806
ENSMUSG00000004044	Ptrf	1.47462
ENSMUSG00000004054	Map3k11	9.92091
ENSMUSG00000004056	Akt2	11.238
ENSMUSG00000004069	Dnaja3	25.4288
ENSMUSG00000004070	Hmox2	15.9527
ENSMUSG00000004071	Cdip1	23.9458
ENSMUSG00000004085	Zak	0.643087
ENSMUSG00000004096	Cwc15	29.0192
ENSMUSG00000004098	Col5a3	1.32196
ENSMUSG00000004099	Dnmt1	1.70296
ENSMUSG00000004100	Ppan	3.63475
ENSMUSG00000004105	Angptl2	2.31608
ENSMUSG00000004127	Trmt10a	0.399824
ENSMUSG00000004151	Etv1	0.180334
ENSMUSG00000004187	Kifc2	1.9922
ENSMUSG00000004207	Psap	240.327
ENSMUSG00000004221	Ikbkg	7.51382
ENSMUSG00000004233	Wars2	0.71302
ENSMUSG00000004263	Atn1	2.73294
ENSMUSG00000004264	Phb2	32.9192
ENSMUSG00000004266	Ptpn6	7.11688
ENSMUSG00000004268	Emg1	5.85721
ENSMUSG00000004270	Lpcat3	33.5015
ENSMUSG00000004285	Atp6v1f	23.2131
ENSMUSG00000004317	Clcn5	0.647127
ENSMUSG00000004319	Clcn3	2.92162
ENSMUSG00000004328	Hif3a	0.0929534
ENSMUSG00000004341	Gpx6	0.301279
ENSMUSG00000004347	Pde1c	0.0238651
ENSMUSG00000004356	Utp20	2.08264
ENSMUSG00000004359	Spic	0.999289
ENSMUSG00000004364	Cul3	11.1541
ENSMUSG00000004383	Large	0.538061
ENSMUSG00000004393	Ddx56	6.8583
ENSMUSG00000004394	Tmed4	20.6981
ENSMUSG00000004415	Col26a1	0.0299232
ENSMUSG00000004446	Bid	3.7139
ENSMUSG00000004451	Ralb	1.45939
ENSMUSG00000004455	Ppp1cc	15.3756
ENSMUSG00000004460	Dnajb11	16.2951
ENSMUSG00000004462	Tbccd1	6.00989
ENSMUSG00000004473	Clec11a	0.423813
ENSMUSG00000004500	Zfp324	0.615646
ENSMUSG00000004508	Gab2	0.849297
ENSMUSG00000004530	Coro1c	1.98316
ENSMUSG00000004535	Tax1bp1	10.9444
ENSMUSG00000004552	Ctse	0.195787
ENSMUSG00000004558	Ndrg2	462.687
ENSMUSG00000004561	Mettl17	2.0705
ENSMUSG00000004562	Arhgef40	0.844229
ENSMUSG00000004565	Pnpla6	5.57712
ENSMUSG00000004567	Mcoln1	7.21293
ENSMUSG00000004568	Arhgef18	3.81641
ENSMUSG00000004591	Pkn2	3.12517
ENSMUSG00000004609	Cd33	0.355635
ENSMUSG00000004610	Etfb	138.357
ENSMUSG00000004612	Nkg7	0.693803
ENSMUSG00000004626	Stxbp2	5.22463
ENSMUSG00000004631	Sgce	0.257807
ENSMUSG00000004633	Chn2	4.81252
ENSMUSG00000004637	Wwox	0.424446
ENSMUSG00000004642	Slbp	1.72758
ENSMUSG00000004651	Tyr	0.0942686
ENSMUSG00000004655	Aqp1	50.1432
ENSMUSG00000004661	Arid3b	0.483597
ENSMUSG00000004665	Cnn2	1.62206
ENSMUSG00000004667	Polr2e	5.29322
ENSMUSG00000004677	Myo9b	3.20259
ENSMUSG00000004698	Hdac9	0.254194
ENSMUSG00000004707	Ly9	0.876192
ENSMUSG00000004709	Cd244	0.0320748
ENSMUSG00000004730	Adgre1	12.9436
ENSMUSG00000004748	Mtfp1	11.2301
ENSMUSG00000004768	Rab23	0.923162
ENSMUSG00000004771	Rab11a	10.5582
ENSMUSG00000004788	Eif2b2	5.58851
ENSMUSG00000004789	Dlst	59.7333
ENSMUSG00000004798	Ulk2	9.81135
ENSMUSG00000004814	Ccl24	2.18757
ENSMUSG00000004815	Dgkq	2.85922
ENSMUSG00000004837	Grap	2.68308
ENSMUSG00000004843	Chmp2b	11.2006
ENSMUSG00000004846	Plod3	5.77981
ENSMUSG00000004849	Ap1s1	8.61613
ENSMUSG00000004865	Srpk1	2.69778
ENSMUSG00000004880	Lbr	2.66583
ENSMUSG00000004891	Nes	0.229735
ENSMUSG00000004895	Prcc	7.02739
ENSMUSG00000004896	Rrnad1	1.48543
ENSMUSG00000004897	Hdgf	47.828
ENSMUSG00000004929	Thop1	1.29403
ENSMUSG00000004931	Apba3	11.7576
ENSMUSG00000004933	Matk	0.0581971
ENSMUSG00000004934	Pias4	2.16719
ENSMUSG00000004936	Map2k1	9.2803
ENSMUSG00000004937	Sgta	23.0313
ENSMUSG00000004945	Tmem242	9.98052
ENSMUSG00000004947	Dtx2	0.507054
ENSMUSG00000004951	Hspb1	7.48046
ENSMUSG00000004952	Rasa4	0.308574
ENSMUSG00000004980	Hnrnpa2b1	37.0881
ENSMUSG00000004994	Ccdc130	1.1129
ENSMUSG00000004996	Mri1	2.66077
ENSMUSG00000005034	Prkacb	5.47676
ENSMUSG00000005043	Sgsh	1.2863
ENSMUSG00000005054	Cstb	33.5075
ENSMUSG00000005057	Sh2b2	0.453864
ENSMUSG00000005069	Pex5	24.2584
ENSMUSG00000005078	Jkamp	5.73942
ENSMUSG00000005087	Cd44	2.05024
ENSMUSG00000005089	Slc1a2	11.0828
ENSMUSG00000005102	Eif2ak4	1.66218
ENSMUSG00000005103	Wdr1	4.07529
ENSMUSG00000005107	Slc2a9	5.12986
ENSMUSG00000005124	Wisp1	0.201511
ENSMUSG00000005125	Ndrg1	1.59795
ENSMUSG00000005142	Man2b1	32.6674
ENSMUSG00000005150	Wdr83	4.45703
ENSMUSG00000005161	Prdx2	26.8246
ENSMUSG00000005198	Polr2a	9.50396
ENSMUSG00000005204	Senp3	6.38808
ENSMUSG00000005220	Corin	0.782743
ENSMUSG00000005225	Plekha8	4.10808
ENSMUSG00000005232	G6pc2	0.142554
ENSMUSG00000005233	Spc25	0.717105
ENSMUSG00000005237	Dnah2	0.015082
ENSMUSG00000005251	Ripk4	1.82609
ENSMUSG00000005262	Ufd1l	5.46543
ENSMUSG00000005267	Zfp287	0.0673339
ENSMUSG00000005268	Prlr	18.6059
ENSMUSG00000005299	Letm1	6.4873
ENSMUSG00000005312	Ubqln1	36.4682
ENSMUSG00000005320	Fgfr4	9.56259
ENSMUSG00000005338	Cadm3	0.653888
ENSMUSG00000005354	Txn2	35.3416
ENSMUSG00000005360	Slc1a3	0.034964
ENSMUSG00000005362	Crbn	3.39212
ENSMUSG00000005364	Il5ra	0.0474877
ENSMUSG00000005370	Msh6	2.65796
ENSMUSG00000005371	Fbxo11	5.20289
ENSMUSG00000005373	Mlxipl	54.6988
ENSMUSG00000005374	Tbl2	2.60503
ENSMUSG00000005378	Wbscr22	5.70778
ENSMUSG00000005397	Nid1	5.48536
ENSMUSG00000005410	Mcm5	0.634495
ENSMUSG00000005413	Hmox1	15.2028
ENSMUSG00000005417	Mprip	6.06182
ENSMUSG00000005442	Cic	3.16097
ENSMUSG00000005447	Pafah1b3	0.611057
ENSMUSG00000005465	Il27ra	0.430822
ENSMUSG00000005469	Prkaca	17.6554
ENSMUSG00000005470	Asf1b	0.247779
ENSMUSG00000005481	Ddx39	2.86401
ENSMUSG00000005483	Dnajb1	9.529
ENSMUSG00000005493	Msh4	0.243755
ENSMUSG00000005501	Usp40	3.13663
ENSMUSG00000005505	Kbtbd4	1.63886
ENSMUSG00000005506	Celf1	10.1691
ENSMUSG00000005510	Ndufs3	35.7699
ENSMUSG00000005514	Por	211.08
ENSMUSG00000005533	Igf1r	0.262606
ENSMUSG00000005534	Insr	17.3118
ENSMUSG00000005540	Fcer2a	0.0937088
ENSMUSG00000005547	Cyp2a5	462.099
ENSMUSG00000005553	Atp4a	0.0326994
ENSMUSG00000005566	Trim28	13.6068
ENSMUSG00000005575	Ube2m	13.207
ENSMUSG00000005580	Adcy9	4.57994
ENSMUSG00000005583	Mef2c	0.254937
ENSMUSG00000005609	Ctr9	3.70231
ENSMUSG00000005610	Eif4g2	66.0631
ENSMUSG00000005611	Mrvi1	0.229242
ENSMUSG00000005615	Pcyt1a	17.0636
ENSMUSG00000005621	Zfp592	4.45319
ENSMUSG00000005625	Psmd4	20.9488
ENSMUSG00000005656	Snx6	6.56971
ENSMUSG00000005667	Mthfd2	0.208745
ENSMUSG00000005672	Kit	0.890541
ENSMUSG00000005674	Tomm40l	11.8057
ENSMUSG00000005677	Nr1i3	28.4426
ENSMUSG00000005681	Apoa2	9023.47
ENSMUSG00000005682	Pan2	4.44378
ENSMUSG00000005683	Cs	35.7747
ENSMUSG00000005686	Ampd3	0.491651
ENSMUSG00000005687	Bcas2	3.68555
ENSMUSG00000005696	Sh2d1a	0.0075103
ENSMUSG00000005698	Ctcf	5.62947
ENSMUSG00000005699	Pard6a	1.55325
ENSMUSG00000005718	Tfap4	0.994432
ENSMUSG00000005732	Ranbp1	7.79598
ENSMUSG00000005763	Cd247	0.236922
ENSMUSG00000005774	Rfx5	0.874227
ENSMUSG00000005779	Psmb4	38.4932
ENSMUSG00000005800	Mmp8	0.0239111
ENSMUSG00000005802	Slc30a4	2.34448
ENSMUSG00000005803	Sqrdl	39.0604
ENSMUSG00000005804	Bloc1s6	2.82847
ENSMUSG00000005813	Metap1	3.96744
ENSMUSG00000005823	Gpr108	10.8019
ENSMUSG00000005824	Tnfsf14	0.192247
ENSMUSG00000005836	Gata6	3.44428
ENSMUSG00000005846	Rsl1d1	12.5351
ENSMUSG00000005871	Apc	2.97751
ENSMUSG00000005873	Reep5	5.2654
ENSMUSG00000005881	Ergic3	26.0698
ENSMUSG00000005882	Uqcc1	3.73555
ENSMUSG00000005883	Spo11	0.0308469
ENSMUSG00000005886	Ncoa2	3.65281
ENSMUSG00000005893	Nr2c2	1.72408
ENSMUSG00000005897	Nr2c1	3.04931
ENSMUSG00000005899	Smpd4	1.3541
ENSMUSG00000005907	Pex1	3.21675
ENSMUSG00000005936	Kctd20	6.83856
ENSMUSG00000005947	Itgae	0.0600258
ENSMUSG00000005949	Ctns	4.02204
ENSMUSG00000005951	Shpk	13.5057
ENSMUSG00000005958	Ephb3	0.0287657
ENSMUSG00000005968	Tuft1	0.970356
ENSMUSG00000005973	Rcn1	2.57124
ENSMUSG00000005980	Dnase1	0.242104
ENSMUSG00000005981	Trap1	55.4715
ENSMUSG00000005982	Naa60	24.5935
ENSMUSG00000005983	1700037C18Rik	0.147288
ENSMUSG00000005986	Ankrd13d	0.139338
ENSMUSG00000006005	Tpr	5.98842
ENSMUSG00000006010	BC003331	6.10838
ENSMUSG00000006014	Prg4	31.4661
ENSMUSG00000006019	Dhx34	1.43229
ENSMUSG00000006021	Kptn	2.52879
ENSMUSG00000006024	Napa	13.6591
ENSMUSG00000006050	Sra1	10.011
ENSMUSG00000006057	Atp5g1	23.231
ENSMUSG00000006058	Snf8	9.35779
ENSMUSG00000006095	Tbcb	7.49411
ENSMUSG00000006127	Inpp5k	2.32491
ENSMUSG00000006134	Crkl	7.56007
ENSMUSG00000006154	Eps8l1	0.210873
ENSMUSG00000006169	Clint1	7.12766
ENSMUSG00000006191	Cdkal1	0.507419
ENSMUSG00000006205	Htra1	0.710819
ENSMUSG00000006215	Zbtb17	2.15991
ENSMUSG00000006218	Fam131c	0.66659
ENSMUSG00000006219	Fblim1	0.221745
ENSMUSG00000006235	Epor	0.797276
ENSMUSG00000006241	Ccdc159	1.57702
ENSMUSG00000006262	Mob1b	2.97319
ENSMUSG00000006273	Atp6v1b2	8.23887
ENSMUSG00000006276	Eps15l1	3.34054
ENSMUSG00000006281	Tep1	1.67613
ENSMUSG00000006288	Ttc5	2.47967
ENSMUSG00000006289	Osgep	1.97003
ENSMUSG00000006299	Aamp	27.0132
ENSMUSG00000006301	Tmbim1	3.37506
ENSMUSG00000006304	Arpc2	39.8742
ENSMUSG00000006307	Kmt2b	3.14595
ENSMUSG00000006310	Zbtb32	0.220491
ENSMUSG00000006315	Tmem147	44.4891
ENSMUSG00000006333	Rps9	79.0841
ENSMUSG00000006335	Tfpt	4.40695
ENSMUSG00000006342	Susd2	0.59915
ENSMUSG00000006344	Ggt5	0.78686
ENSMUSG00000006345	Ggt1	0.0355283
ENSMUSG00000006356	Crip2	37.5815
ENSMUSG00000006360	Crip1	1.05696
ENSMUSG00000006362	Cbfa2t3	0.782332
ENSMUSG00000006369	Fbln1	0.0758097
ENSMUSG00000006373	Pgrmc1	459.406
ENSMUSG00000006378	Gcat	13.7478
ENSMUSG00000006386	Tek	3.56838
ENSMUSG00000006390	Elovl1	8.15997
ENSMUSG00000006392	Med8	7.91456
ENSMUSG00000006398	Cdc20	0.183452
ENSMUSG00000006403	Adamts4	0.0355392
ENSMUSG00000006411	Pvrl4	0.1057
ENSMUSG00000006412	Pfdn2	10.7332
ENSMUSG00000006418	Rnf114	14.8256
ENSMUSG00000006423	C330007P06Rik	3.12851
ENSMUSG00000006435	Neurl1a	0.0653286
ENSMUSG00000006442	Srm	9.02883
ENSMUSG00000006445	Epha2	6.50253
ENSMUSG00000006456	Rbm14	4.24514
ENSMUSG00000006463	Zdhhc24	0.986598
ENSMUSG00000006464	Bbs1	0.221774
ENSMUSG00000006471	Ndor1	2.29999
ENSMUSG00000006476	Nsmf	12.5106
ENSMUSG00000006494	Pdk1	15.4463
ENSMUSG00000006498	Ptbp1	18.2504
ENSMUSG00000006517	Mvd	7.96795
ENSMUSG00000006519	Cyba	11.0701
ENSMUSG00000006522	Itih3	380.22
ENSMUSG00000006526	Tmem110	2.57092
ENSMUSG00000006527	Sfmbt1	2.83758
ENSMUSG00000006529	Itih1	302.5
ENSMUSG00000006538	Ihh	0.0633402
ENSMUSG00000006542	Prkag3	0.0684934
ENSMUSG00000006567	Atp7b	4.44745
ENSMUSG00000006574	Slc4a1	0.0322163
ENSMUSG00000006575	Rundc3a	3.62321
ENSMUSG00000006576	Slc4a3	0.0337618
ENSMUSG00000006585	Cdt1	0.686985
ENSMUSG00000006586	Runx1t1	0.0150697
ENSMUSG00000006587	Snai3	0.288912
ENSMUSG00000006589	Aprt	19.5723
ENSMUSG00000006599	Gtf2h1	7.10338
ENSMUSG00000006611	Hfe	13.3805
ENSMUSG00000006641	Slc5a6	1.60046
ENSMUSG00000006651	Aplp1	0.154693
ENSMUSG00000006673	Qrich1	4.2757
ENSMUSG00000006675	P4htm	0.0247001
ENSMUSG00000006676	Usp19	9.70192
ENSMUSG00000006678	Pola1	0.36107
ENSMUSG00000006699	Cdc42	32.4318
ENSMUSG00000006705	Pknox1	1.95853
ENSMUSG00000006711	D130043K22Rik	1.28923
ENSMUSG00000006715	Gmnn	3.09686
ENSMUSG00000006717	Acot13	47.9764
ENSMUSG00000006720	Zfp184	0.0212807
ENSMUSG00000006728	Cdk4	7.72102
ENSMUSG00000006731	B4galnt1	33.516
ENSMUSG00000006732	Mettl1	2.14738
ENSMUSG00000006736	Tspan31	112.445
ENSMUSG00000006740	Kif5b	5.99422
ENSMUSG00000006763	Saal1	0.39792
ENSMUSG00000006777	Krt23	6.55205
ENSMUSG00000006782	Cnp	2.69809
ENSMUSG00000006784	Ttc25	0.0995892
ENSMUSG00000006800	Sulf2	7.49295
ENSMUSG00000006818	Sod2	41.2005
ENSMUSG00000006850	Tmco6	2.16394
ENSMUSG00000006906	Stambp	3.49188
ENSMUSG00000006920	Ezh1	1.96797
ENSMUSG00000006930	Hap1	0.489961
ENSMUSG00000006931	P3h4	0.220576
ENSMUSG00000006932	Ctnnb1	35.2963
ENSMUSG00000006941	Eif1b	11.1253
ENSMUSG00000006958	Chrd	0.594005
ENSMUSG00000006998	Psmd2	27.7897
ENSMUSG00000007021	Syngr3	0.0259242
ENSMUSG00000007029	Vars	5.04042
ENSMUSG00000007030	Vwa7	0.0503035
ENSMUSG00000007033	Hspa1l	0.24151
ENSMUSG00000007034	Slc44a4	0.0708474
ENSMUSG00000007035	Msh5	0.0906519
ENSMUSG00000007036	Abhd16a	8.05551
ENSMUSG00000007038	Neu1	7.95987
ENSMUSG00000007039	Ddah2	1.19383
ENSMUSG00000007041	Clic1	6.16392
ENSMUSG00000007050	Lsm2	1.76492
ENSMUSG00000007080	Pole	0.203962
ENSMUSG00000007097	Atp1a2	0.0720099
ENSMUSG00000007122	Casq1	0.0829838
ENSMUSG00000007207	Stx1a	0.180526
ENSMUSG00000007216	Zfp775	0.362472
ENSMUSG00000007338	Mrpl49	11.087
ENSMUSG00000007379	Dennd2c	0.158407
ENSMUSG00000007411	Mark3	9.09533
ENSMUSG00000007415	Gatad1	9.11593
ENSMUSG00000007458	M6pr	18.3362
ENSMUSG00000007476	Lrrc8a	3.97461
ENSMUSG00000007564	Ppp2r1a	13.5495
ENSMUSG00000007570	Fance	1.77658
ENSMUSG00000007589	Tinf2	3.10317
ENSMUSG00000007591	Tssk4	0.0683237
ENSMUSG00000007594	Hapln4	1.58993
ENSMUSG00000007603	Dus3l	4.10869
ENSMUSG00000007610	Gtpbp3	1.60507
ENSMUSG00000007613	Tgfbr1	4.69577
ENSMUSG00000007617	Homer1	0.963786
ENSMUSG00000007646	Rad51c	0.190207
ENSMUSG00000007655	Cav1	0.606944
ENSMUSG00000007656	Arpp19	5.34067
ENSMUSG00000007659	Bcl2l1	8.17918
ENSMUSG00000007670	Khsrp	7.96677
ENSMUSG00000007721	Ccdc124	17.4239
ENSMUSG00000007739	Cct4	19.7415
ENSMUSG00000007777	0610009B22Rik	11.2995
ENSMUSG00000007783	Cpt1c	0.0776565
ENSMUSG00000007812	Zfp655	5.16046
ENSMUSG00000007815	Rhoa	15.1842
ENSMUSG00000007817	Zmiz1	5.26281
ENSMUSG00000007827	Ankrd26	0.738638
ENSMUSG00000007833	Aldh16a1	10.2054
ENSMUSG00000007836	Hnrnpa0	9.88528
ENSMUSG00000007837	Prrg2	7.46951
ENSMUSG00000007850	Hnrnph1	11.2753
ENSMUSG00000007867	Ift43	1.27244
ENSMUSG00000007872	Id3	22.4681
ENSMUSG00000007880	Arid1a	3.56278
ENSMUSG00000007891	Ctsd	167.101
ENSMUSG00000007892	Rplp1	678.437
ENSMUSG00000007908	Hmgcll1	0.00734799
ENSMUSG00000007950	Abhd8	2.13832
ENSMUSG00000007987	Ift22	0.716559
ENSMUSG00000007989	Fzd3	0.023255
ENSMUSG00000008028	1700008O03Rik	0.0680034
ENSMUSG00000008035	Mid1ip1	13.7481
ENSMUSG00000008036	Ap2s1	26.739
ENSMUSG00000008090	Fgfrl1	5.41926
ENSMUSG00000008129	4930432K21Rik	0.0227927
ENSMUSG00000008136	Fhl2	0.0787533
ENSMUSG00000008140	Emc10	22.7575
ENSMUSG00000008153	Clstn3	0.522066
ENSMUSG00000008167	Fbxw9	3.28384
ENSMUSG00000008193	Spib	0.107611
ENSMUSG00000008200	Fnbp4	3.44502
ENSMUSG00000008206	Cers4	0.364867
ENSMUSG00000008226	Scrn3	9.04107
ENSMUSG00000008301	Phax	6.94962
ENSMUSG00000008305	Tle1	3.81995
ENSMUSG00000008307	1700109H08Rik	0.333974
ENSMUSG00000008318	Relt	0.207226
ENSMUSG00000008333	Snrpb2	2.63055
ENSMUSG00000008348	Ubc	55.0672
ENSMUSG00000008373	Prpf31	1.58218
ENSMUSG00000008384	Sertad1	3.85392
ENSMUSG00000008393	Carhsp1	26.7234
ENSMUSG00000008398	Elk3	2.42602
ENSMUSG00000008429	Herpud2	9.04086
ENSMUSG00000008435	Rdh13	1.48349
ENSMUSG00000008450	Nutf2	3.97482
ENSMUSG00000008461	Fut1	0.0213245
ENSMUSG00000008475	Arpc5	21.7019
ENSMUSG00000008496	Pou2f2	0.355702
ENSMUSG00000008540	Mgst1	1024
ENSMUSG00000008575	Nfib	4.98103
ENSMUSG00000008604	Ubqln4	11.2737
ENSMUSG00000008668	Rps18	48.2516
ENSMUSG00000008682	Rpl10	8.87601
ENSMUSG00000008683	Rps15a	14.0902
ENSMUSG00000008690	Ncaph2	13.851
ENSMUSG00000008730	Hipk1	8.57844
ENSMUSG00000008734	Gprc5b	0.084191
ENSMUSG00000008763	Man1a2	6.51874
ENSMUSG00000008822	Acyp1	1.9059
ENSMUSG00000008845	Cd163	11.8023
ENSMUSG00000008855	Hdac5	4.54468
ENSMUSG00000008859	Rala	5.91908
ENSMUSG00000008892	Vdac3	29.3367
ENSMUSG00000008932	Slc1a7	0.031441
ENSMUSG00000008958	Vps72	2.75094
ENSMUSG00000008976	Gabpa	7.37708
ENSMUSG00000008999	Bmp7	1.58315
ENSMUSG00000009013	Dynll1	3.90798
ENSMUSG00000009030	Pdcl	4.74205
ENSMUSG00000009035	Tmem184b	4.57701
ENSMUSG00000009073	Nf2	4.44863
ENSMUSG00000009075	Cabp7	0.2193
ENSMUSG00000009076	Zmat5	1.77327
ENSMUSG00000009079	Ewsr1	11.7324
ENSMUSG00000009090	Ap1b1	11.4113
ENSMUSG00000009092	Derl3	0.349907
ENSMUSG00000009108	Gnat2	0.218235
ENSMUSG00000009112	Bcl2l13	5.85787
ENSMUSG00000009114	2610028H24Rik	0.0795947
ENSMUSG00000009115	Spatc1l	0.186398
ENSMUSG00000009145	Dqx1	2.55317
ENSMUSG00000009207	Lnp	0.445627
ENSMUSG00000009246	Trpm5	0.0358028
ENSMUSG00000009281	Rarres2	103.189
ENSMUSG00000009291	Pttg1ip	64.7283
ENSMUSG00000009292	Trpm2	1.3674
ENSMUSG00000009293	Ube2g2	14.8391
ENSMUSG00000009376	Met	11.4474
ENSMUSG00000009378	Slc16a12	16.8049
ENSMUSG00000009394	Syn2	0.012695
ENSMUSG00000009406	Elk1	0.998453
ENSMUSG00000009418	Nav1	0.377836
ENSMUSG00000009470	Tnpo1	9.36805
ENSMUSG00000009535	Rnmt	1.21181
ENSMUSG00000009545	Kcnq1	0.418593
ENSMUSG00000009549	Srp14	16.5578
ENSMUSG00000009551	6330409D20Rik	0.123202
ENSMUSG00000009555	Cdk9	5.26941
ENSMUSG00000009563	Tor2a	8.37747
ENSMUSG00000009566	Fpgs	43.7751
ENSMUSG00000009569	Mkl2	3.83178
ENSMUSG00000009575	Cbx5	3.44872
ENSMUSG00000009585	Apobec3	0.896887
ENSMUSG00000009614	Sardh	215.986
ENSMUSG00000009621	Vav2	5.90181
ENSMUSG00000009630	Ppp2cb	12.603
ENSMUSG00000009633	G0s2	76.2569
ENSMUSG00000009640	Dmap1	2.1132
ENSMUSG00000009646	Pla2g12b	26.332
ENSMUSG00000009647	Mcu	1.58184
ENSMUSG00000009654	Oit3	17.8589
ENSMUSG00000009681	Bcr	4.96746
ENSMUSG00000009687	Fxyd5	0.794402
ENSMUSG00000009731	Kcnd1	0.044098
ENSMUSG00000009733	Tfcp2	1.47623
ENSMUSG00000009739	Pou6f1	0.687405
ENSMUSG00000009741	Ubp1	11.827
ENSMUSG00000009772	Nuak2	3.01005
ENSMUSG00000009828	Ick	1.09295
ENSMUSG00000009863	Sdhb	78.308
ENSMUSG00000009894	Snap47	13.7219
ENSMUSG00000009905	Kdsr	2.30943
ENSMUSG00000009907	Vps4b	4.77136
ENSMUSG00000009927	Rps25	175.056
ENSMUSG00000009995	Taz	3.7721
ENSMUSG00000010021	Kif19a	0.0468931
ENSMUSG00000010025	Aldh3a2	60.8173
ENSMUSG00000010044	Zmynd10	0.115422
ENSMUSG00000010045	Tmem115	9.09377
ENSMUSG00000010047	Hyal2	14.2007
ENSMUSG00000010048	Ifrd2	8.05976
ENSMUSG00000010051	Hyal1	13.5417
ENSMUSG00000010054	Tusc2	10.6218
ENSMUSG00000010057	Nprl2	4.76199
ENSMUSG00000010064	Slc38a3	172.682
ENSMUSG00000010067	Rassf1	0.852179
ENSMUSG00000010095	Slc3a2	14.8582
ENSMUSG00000010097	Nxf1	10.5649
ENSMUSG00000010110	Stx5a	7.59047
ENSMUSG00000010122	Slc47a1	48.2028
ENSMUSG00000010142	Tnfrsf13b	0.0696081
ENSMUSG00000010154	Spire2	0.0299546
ENSMUSG00000010175	Prox1	18.5244
ENSMUSG00000010205	Raver1	5.73798
ENSMUSG00000010277	2610507B11Rik	20.1161
ENSMUSG00000010290	AI597479	2.95908
ENSMUSG00000010307	Tmem86a	4.30944
ENSMUSG00000010311	Optc	0.0523501
ENSMUSG00000010342	Tex14	0.0676639
ENSMUSG00000010358	Ifi35	8.48998
ENSMUSG00000010362	Rdm1	3.10327
ENSMUSG00000010376	Nedd8	44.9741
ENSMUSG00000010392	Gosr1	8.0028
ENSMUSG00000010406	Mrpl52	16.4695
ENSMUSG00000010453	Kansl3	7.04474
ENSMUSG00000010461	Eya4	0.0396548
ENSMUSG00000010476	Ebf3	0.0128011
ENSMUSG00000010517	Faf1	5.92363
ENSMUSG00000010538	Tsacc	0.848404
ENSMUSG00000010554	Mettl16	0.686958
ENSMUSG00000010601	Apol7a	13.5575
ENSMUSG00000010607	Pigyl	13.0107
ENSMUSG00000010608	Rbm25	3.49029
ENSMUSG00000010609	Psen2	38.959
ENSMUSG00000010651	Acaa1b	459.413
ENSMUSG00000010660	Plcd1	0.152155
ENSMUSG00000010663	Fads1	145.499
ENSMUSG00000010721	Lmbr1	0.631527
ENSMUSG00000010751	Tnfrsf22	0.637398
ENSMUSG00000010755	Cars	3.08062
ENSMUSG00000010797	Wnt2	1.39966
ENSMUSG00000010911	Apip	7.64006
ENSMUSG00000010914	Pdhx	4.61684
ENSMUSG00000010936	Vac14	7.79008
ENSMUSG00000011008	Mcoln2	0.0707518
ENSMUSG00000011034	Slc5a1	0.153314
ENSMUSG00000011096	Akt1s1	7.40378
ENSMUSG00000011114	Tbrg1	7.43537
ENSMUSG00000011148	Adssl1	14.8943
ENSMUSG00000011158	Brf1	4.74733
ENSMUSG00000011179	Odc1	32.3544
ENSMUSG00000011254	Thg1l	0.4891
ENSMUSG00000011256	Adam19	0.172831
ENSMUSG00000011257	Pabpc4	7.31265
ENSMUSG00000011263	Exoc3l2	2.49574
ENSMUSG00000011267	Zfp296	0.296108
ENSMUSG00000011305	Plin5	55.6864
ENSMUSG00000011306	Sugp1	4.52611
ENSMUSG00000011382	Dhdh	26.7814
ENSMUSG00000011427	Zfp790	1.95527
ENSMUSG00000011658	Fuz	1.14862
ENSMUSG00000011752	Pgam1	47.5538
ENSMUSG00000011831	Evi5	13.7851
ENSMUSG00000011832	Evi5l	0.391334
ENSMUSG00000011837	Snapc2	4.03133
ENSMUSG00000011877	Git1	2.38795
ENSMUSG00000011884	Gltp	2.76255
ENSMUSG00000011958	Bnip2	10.0156
ENSMUSG00000011960	Ccnt1	3.00592
ENSMUSG00000012017	Scarf2	0.922901
ENSMUSG00000012076	Brms1l	1.3591
ENSMUSG00000012114	Med15	6.51078
ENSMUSG00000012117	Dhdds	5.56819
ENSMUSG00000012123	Aim1l	0.204513
ENSMUSG00000012126	Ubxn11	0.0138385
ENSMUSG00000012187	Mogat1	0.292392
ENSMUSG00000012296	Tjap1	1.71458
ENSMUSG00000012350	Ehf	0.0566058
ENSMUSG00000012405	Rpl15	25.3661
ENSMUSG00000012422	Tmem167	2.57751
ENSMUSG00000012428	Steap4	30.1023
ENSMUSG00000012429	Mplkip	1.75262
ENSMUSG00000012443	Kif11	0.261066
ENSMUSG00000012483	Rpa3	1.59147
ENSMUSG00000012519	Mlkl	0.902986
ENSMUSG00000012535	Tnpo3	3.28376
ENSMUSG00000012609	Ttll5	0.51389
ENSMUSG00000012640	Zfp715	2.61183
ENSMUSG00000012777	Acpt	0.0384355
ENSMUSG00000012848	Rps5	100.526
ENSMUSG00000012889	Podnl1	0.0356792
ENSMUSG00000013033	Adgrl1	0.581384
ENSMUSG00000013076	Amotl1	1.42848
ENSMUSG00000013089	Etv5	0.9846
ENSMUSG00000013150	Gfod2	1.84253
ENSMUSG00000013155	Enkd1	0.177642
ENSMUSG00000013160	Atp6v0d1	32.5467
ENSMUSG00000013236	Ptprs	0.318598
ENSMUSG00000013275	Slc41a1	0.846788
ENSMUSG00000013367	Iglon5	0.091253
ENSMUSG00000013418	B4galnt2	0.0232516
ENSMUSG00000013419	Zfp651	0.126973
ENSMUSG00000013465	Nelfb	5.22042
ENSMUSG00000013483	Card14	0.143981
ENSMUSG00000013495	Tmem175	1.80949
ENSMUSG00000013539	Tango2	7.1588
ENSMUSG00000013584	Aldh1a2	0.0390397
ENSMUSG00000013593	Ndufs2	74.3937
ENSMUSG00000013622	Atraid	26.0758
ENSMUSG00000013629	Cad	1.27655
ENSMUSG00000013646	Sh3bp5l	2.37909
ENSMUSG00000013662	Atad1	18.9176
ENSMUSG00000013663	Pten	11.022
ENSMUSG00000013698	Pea15a	4.0887
ENSMUSG00000013701	Timm23	5.68315
ENSMUSG00000013707	Tnfaip8l2	1.69407
ENSMUSG00000013736	Trnt1	3.03392
ENSMUSG00000013766	Ly6g6e	0.0721041
ENSMUSG00000013787	Ehmt2	9.13607
ENSMUSG00000013822	Elof1	17.6008
ENSMUSG00000013833	Med16	3.11967
ENSMUSG00000013846	St3gal1	20.2383
ENSMUSG00000013858	Tmem259	15.4332
ENSMUSG00000013878	Rnf170	3.75088
ENSMUSG00000013921	Clip3	0.0991162
ENSMUSG00000013973	Dedd	1.59188
ENSMUSG00000013974	Mcemp1	0.0447009
ENSMUSG00000013997	Nit1	15.1165
ENSMUSG00000014030	Pax5	0.0200207
ENSMUSG00000014039	Prdm15	0.496588
ENSMUSG00000014074	Rnf168	2.93243
ENSMUSG00000014075	Tctex1d2	0.22115
ENSMUSG00000014077	Chp1	113.937
ENSMUSG00000014158	Trpv4	0.232287
ENSMUSG00000014164	Klhl3	1.8163
ENSMUSG00000014177	Tvp23b	7.24877
ENSMUSG00000014195	Dnajc7	8.70427
ENSMUSG00000014226	Cacybp	9.96738
ENSMUSG00000014232	Cluap1	1.75297
ENSMUSG00000014243	Zswim7	5.497
ENSMUSG00000014245	Pigl	1.57052
ENSMUSG00000014294	Ndufa2	96.7992
ENSMUSG00000014301	Pam16	0.658868
ENSMUSG00000014303	Glis2	0.300557
ENSMUSG00000014313	Cox6c	34.1119
ENSMUSG00000014329	Bicc1	0.259982
ENSMUSG00000014349	Ube2z	10.6286
ENSMUSG00000014353	Tmem87b	3.69861
ENSMUSG00000014355	Anapc1	2.49358
ENSMUSG00000014361	Mertk	8.22105
ENSMUSG00000014402	Tsg101	8.53999
ENSMUSG00000014418	Hps5	2.21791
ENSMUSG00000014426	Map3k4	2.80992
ENSMUSG00000014444	Piezo1	0.56438
ENSMUSG00000014453	Blk	0.0508657
ENSMUSG00000014470	Rnf166	5.14597
ENSMUSG00000014496	Ankrd28	7.00106
ENSMUSG00000014498	Ankrd52	3.96974
ENSMUSG00000014503	Pkd2l2	0.457902
ENSMUSG00000014504	Srp19	3.24169
ENSMUSG00000014542	Clec4f	69.4759
ENSMUSG00000014547	Wdfy2	2.52179
ENSMUSG00000014550	Rbsn	1.58308
ENSMUSG00000014551	Mrps25	2.44237
ENSMUSG00000014554	Dguok	2.78074
ENSMUSG00000014592	Camta1	0.173339
ENSMUSG00000014599	Csf1	4.60754
ENSMUSG00000014601	Strip1	2.61394
ENSMUSG00000014606	Slc25a11	27.3623
ENSMUSG00000014633	Cmc2	2.63769
ENSMUSG00000014668	Chfr	3.16623
ENSMUSG00000014686	Ceacam16	0.0144566
ENSMUSG00000014704	Hoxa2	0.177474
ENSMUSG00000014725	Adam28	0.0525001
ENSMUSG00000014748	Tex261	20.1341
ENSMUSG00000014763	Fam120b	3.58342
ENSMUSG00000014767	Tbp	0.91022
ENSMUSG00000014769	Psmb1	67.1298
ENSMUSG00000014771	Pdcd2	1.22675
ENSMUSG00000014773	Dll1	1.4265
ENSMUSG00000014776	Nol3	0.236829
ENSMUSG00000014778	Fhod1	1.82542
ENSMUSG00000014782	Plekhg4	0.0196672
ENSMUSG00000014786	Slc9a5	0.0888698
ENSMUSG00000014791	Elmo3	4.20437
ENSMUSG00000014837	4931428F04Rik	0.385657
ENSMUSG00000014846	Tppp3	0.193204
ENSMUSG00000014850	Msh3	0.961714
ENSMUSG00000014852	Adamts13	0.965259
ENSMUSG00000014856	Tmem208	14.4556
ENSMUSG00000014859	E2f4	6.78657
ENSMUSG00000014867	Surf4	63.3797
ENSMUSG00000014873	Surf2	3.89675
ENSMUSG00000014905	Dnajb9	19.4016
ENSMUSG00000014907	Naf1	1.11035
ENSMUSG00000014932	Yes1	2.68272
ENSMUSG00000014956	Ppp1cb	8.0982
ENSMUSG00000014959	Gorasp2	15.7649
ENSMUSG00000014980	Tsen15	0.965377
ENSMUSG00000015002	Efr3a	3.84535
ENSMUSG00000015013	Trappc2l	9.99803
ENSMUSG00000015016	Acsf3	8.87958
ENSMUSG00000015023	Ddx19a	7.49997
ENSMUSG00000015027	Galns	2.14915
ENSMUSG00000015053	Gata2	0.244801
ENSMUSG00000015083	C8g	209.717
ENSMUSG00000015085	Entpd2	0.833839
ENSMUSG00000015087	Rabl6	2.90064
ENSMUSG00000015090	Ptgds	10.0631
ENSMUSG00000015092	Edf1	62.6907
ENSMUSG00000015093	Clic3	1.9333
ENSMUSG00000015094	Npdc1	0.715107
ENSMUSG00000015095	Fbxw5	9.30044
ENSMUSG00000015112	Slc25a13	43.5278
ENSMUSG00000015120	Ube2i	5.30011
ENSMUSG00000015126	Tsr3	5.69204
ENSMUSG00000015127	Unkl	1.8657
ENSMUSG00000015133	Lrrk1	1.42076
ENSMUSG00000015134	Aldh1a3	0.110121
ENSMUSG00000015143	Actn1	5.24955
ENSMUSG00000015149	Sirt2	10.4489
ENSMUSG00000015165	Hnrnpl	10.5515
ENSMUSG00000015176	Nolc1	6.30299
ENSMUSG00000015189	Casd1	6.43083
ENSMUSG00000015202	Cnksr3	1.95253
ENSMUSG00000015214	Mtmr1	5.41964
ENSMUSG00000015217	Hmgb3	2.80701
ENSMUSG00000015222	Map2	0.0502913
ENSMUSG00000015224	Cyp2j9	1.47308
ENSMUSG00000015243	Abca1	23.328
ENSMUSG00000015247	Nipsnap3b	19.4095
ENSMUSG00000015289	Lage3	4.10312
ENSMUSG00000015290	Ubl4a	7.52639
ENSMUSG00000015291	Gdi1	9.63522
ENSMUSG00000015305	Sash1	8.28011
ENSMUSG00000015312	Gadd45b	2.16842
ENSMUSG00000015314	Slamf6	0.0387325
ENSMUSG00000015316	Slamf1	0.0685843
ENSMUSG00000015335	Zdhhc12	4.71782
ENSMUSG00000015337	Endog	19.1419
ENSMUSG00000015340	Cybb	4.95559
ENSMUSG00000015341	Golga7	19.5245
ENSMUSG00000015342	Xk	0.836036
ENSMUSG00000015354	Pcolce2	0.45945
ENSMUSG00000015355	Cd48	2.27168
ENSMUSG00000015357	Clpx	66.5902
ENSMUSG00000015363	Trabd	12.2846
ENSMUSG00000015377	Dennd6b	0.858999
ENSMUSG00000015396	Cd83	0.737915
ENSMUSG00000015405	Ace2	0.0998883
ENSMUSG00000015437	Gzmb	0.458365
ENSMUSG00000015452	Ager	0.164646
ENSMUSG00000015461	Atf6b	5.79492
ENSMUSG00000015467	Egfl8	0.228225
ENSMUSG00000015468	Notch4	0.796995
ENSMUSG00000015474	Ppt2	8.58041
ENSMUSG00000015476	Prrt1	0.125833
ENSMUSG00000015478	Rnf5	21.5171
ENSMUSG00000015488	Cacfd1	5.86124
ENSMUSG00000015501	Hivep2	0.842019
ENSMUSG00000015522	Arnt	4.61805
ENSMUSG00000015536	Mocs2	9.3941
ENSMUSG00000015542	Nat9	6.92757
ENSMUSG00000015568	Lpl	2.16908
ENSMUSG00000015575	Atp6v0e	7.77821
ENSMUSG00000015597	Zfp318	3.4068
ENSMUSG00000015599	Ttbk1	0.0188727
ENSMUSG00000015605	Srf	2.5512
ENSMUSG00000015619	Gata3	0.0290482
ENSMUSG00000015627	Gata5	0.0355072
ENSMUSG00000015647	Lama5	0.305354
ENSMUSG00000015652	Steap1	0.0680838
ENSMUSG00000015653	Steap2	0.731693
ENSMUSG00000015656	Hspa8	159.61
ENSMUSG00000015659	Serac1	0.487554
ENSMUSG00000015668	Pdzd11	4.18046
ENSMUSG00000015671	Psma2	41.1852
ENSMUSG00000015672	Mrpl32	12.4022
ENSMUSG00000015697	Setdb1	3.04841
ENSMUSG00000015702	Anxa9	0.199732
ENSMUSG00000015711	Prune	3.95971
ENSMUSG00000015714	Cers2	68.2068
ENSMUSG00000015733	Capza2	11.2873
ENSMUSG00000015745	Plekho1	2.55864
ENSMUSG00000015747	Vps45	1.24761
ENSMUSG00000015748	Prpf3	1.42775
ENSMUSG00000015749	Anp32e	5.06561
ENSMUSG00000015750	Aph1a	14.8332
ENSMUSG00000015755	Tab2	12.9787
ENSMUSG00000015757	Ppil4	2.2727
ENSMUSG00000015759	Cnih1	26.5219
ENSMUSG00000015766	Eps8	0.137373
ENSMUSG00000015776	Med22	7.11733
ENSMUSG00000015790	Surf1	13.5129
ENSMUSG00000015804	Med28	2.13328
ENSMUSG00000015806	Qdpr	125.989
ENSMUSG00000015812	Gnrh1	0.279053
ENSMUSG00000015837	Sqstm1	70.0157
ENSMUSG00000015839	Nfe2l2	12.8411
ENSMUSG00000015843	Rxrg	1.70198
ENSMUSG00000015846	Rxra	65.1036
ENSMUSG00000015850	Adamtsl4	0.964398
ENSMUSG00000015852	Fcrls	0.020638
ENSMUSG00000015854	Cd5l	77.4716
ENSMUSG00000015869	Prpsap1	12.9469
ENSMUSG00000015879	Fam184b	0.0115331
ENSMUSG00000015880	Ncapg	0.0866122
ENSMUSG00000015882	Lcorl	0.537858
ENSMUSG00000015889	Lta4h	11.6697
ENSMUSG00000015890	Amdhd1	48.4045
ENSMUSG00000015932	Dstn	73.1115
ENSMUSG00000015937	H2afy	6.21251
ENSMUSG00000015942	Gtf2ird2	1.04191
ENSMUSG00000015943	Bola1	7.21783
ENSMUSG00000015944	Gatsl2	0.370776
ENSMUSG00000015947	Fcgr1	2.10635
ENSMUSG00000015950	Ncf1	1.71961
ENSMUSG00000015957	Wnt11	0.0777608
ENSMUSG00000015961	Adss	7.73158
ENSMUSG00000015966	Il17rb	2.17243
ENSMUSG00000015968	Cacna1d	0.213131
ENSMUSG00000015970	Chdh	24.2985
ENSMUSG00000015971	Actr8	7.93182
ENSMUSG00000015980	Lrrc27	0.0964919
ENSMUSG00000015981	Stk32c	0.0713873
ENSMUSG00000015994	Fnta	11.4484
ENSMUSG00000016018	Skiv2l2	5.47515
ENSMUSG00000016024	Lbp	33.1837
ENSMUSG00000016028	Celsr1	1.73452
ENSMUSG00000016087	Fli1	0.88683
ENSMUSG00000016128	Stard13	2.1657
ENSMUSG00000016181	Diexf	1.18529
ENSMUSG00000016194	Hsd11b1	139.121
ENSMUSG00000016206	H2-M3	1.97859
ENSMUSG00000016239	Lonrf3	2.00573
ENSMUSG00000016252	Atp5e	44.9853
ENSMUSG00000016253	Nelfcd	7.31632
ENSMUSG00000016255	Tubb1	0.0491577
ENSMUSG00000016256	Ctsz	125.119
ENSMUSG00000016257	Slmo2	14.4172
ENSMUSG00000016262	Sertad4	0.0462874
ENSMUSG00000016308	Ube2a	7.58449
ENSMUSG00000016319	Slc25a5	263.433
ENSMUSG00000016344	Ppdpf	23.1852
ENSMUSG00000016356	Col20a1	0.287273
ENSMUSG00000016382	Pls3	16.8184
ENSMUSG00000016409	Nkap	1.73041
ENSMUSG00000016427	Ndufa1	105.826
ENSMUSG00000016458	Wt1	0.0175474
ENSMUSG00000016477	E2f3	1.42204
ENSMUSG00000016481	Cr1l	3.47369
ENSMUSG00000016487	Ppfibp1	2.2139
ENSMUSG00000016493	Cd46	0.273997
ENSMUSG00000016494	Cd34	0.490065
ENSMUSG00000016495	Plgrkt	0.896603
ENSMUSG00000016496	Cd274	0.666725
ENSMUSG00000016503	Gtf3a	1.90947
ENSMUSG00000016510	Mtif3	3.77674
ENSMUSG00000016520	Lnx2	5.63606
ENSMUSG00000016526	Dyrk3	0.170133
ENSMUSG00000016528	Mapkapk2	28.8567
ENSMUSG00000016529	Il10	0.0592719
ENSMUSG00000016534	Lamp2	72.7947
ENSMUSG00000016541	Atxn10	16.1263
ENSMUSG00000016552	Foxred2	0.0238468
ENSMUSG00000016554	Eif3d	29.3098
ENSMUSG00000016559	H3f3b	36.7755
ENSMUSG00000016619	Nup50	6.35929
ENSMUSG00000016624	Phf21b	0.196999
ENSMUSG00000016637	Ift27	5.32527
ENSMUSG00000016664	Pacsin2	9.61362
ENSMUSG00000016756	Cmah	8.96938
ENSMUSG00000016757	Ttll12	1.81059
ENSMUSG00000016758	Bik	1.12397
ENSMUSG00000016763	Scube1	0.0340658
ENSMUSG00000016831	Tox4	4.9392
ENSMUSG00000016833	Mrps18c	10.902
ENSMUSG00000016918	Sulf1	0.0591967
ENSMUSG00000016921	Srsf6	20.3926
ENSMUSG00000016933	Plcg1	5.69672
ENSMUSG00000016940	Kctd2	5.97201
ENSMUSG00000016942	Tmprss6	104.526
ENSMUSG00000016946	Kctd5	1.31291
ENSMUSG00000016984	Etaa1	1.22455
ENSMUSG00000017002	Slpi	0.834366
ENSMUSG00000017009	Sdc4	125.201
ENSMUSG00000017057	Il13ra1	10.2421
ENSMUSG00000017119	Nbr1	26.9773
ENSMUSG00000017132	Cyth1	8.62845
ENSMUSG00000017144	Rnd3	4.17765
ENSMUSG00000017146	Brca1	0.381922
ENSMUSG00000017167	Cntnap1	0.299101
ENSMUSG00000017176	Nt5c3b	0.418307
ENSMUSG00000017188	Coa3	22.939
ENSMUSG00000017210	Med24	2.12508
ENSMUSG00000017221	Psmd3	11.5741
ENSMUSG00000017264	Exosc10	4.83906
ENSMUSG00000017286	Glod4	5.11591
ENSMUSG00000017288	Vps53	4.30115
ENSMUSG00000017291	Taok1	3.73844
ENSMUSG00000017299	Dnttip1	3.34965
ENSMUSG00000017307	Acot8	5.75335
ENSMUSG00000017309	Cd300lg	8.89233
ENSMUSG00000017314	Mpp2	0.0872927
ENSMUSG00000017344	Vtn	863.911
ENSMUSG00000017376	Nlk	1.65807
ENSMUSG00000017386	Traf4	9.05634
ENSMUSG00000017390	Aldoc	3.57882
ENSMUSG00000017400	Stac2	0.0251763
ENSMUSG00000017404	Rpl19	79.4188
ENSMUSG00000017405	Nek8	0.586999
ENSMUSG00000017412	Cacnb4	0.140562
ENSMUSG00000017417	Plxdc1	0.140116
ENSMUSG00000017418	Arl5b	3.05623
ENSMUSG00000017421	Zfp207	7.74856
ENSMUSG00000017428	Psmd11	10.0318
ENSMUSG00000017446	C1qtnf1	6.88844
ENSMUSG00000017453	Pipox	84.6897
ENSMUSG00000017466	Timp2	2.30823
ENSMUSG00000017478	Zc3h18	5.36826
ENSMUSG00000017485	Top2b	6.50369
ENSMUSG00000017491	Rarb	1.11564
ENSMUSG00000017493	Igfbp4	267.757
ENSMUSG00000017499	Cdc6	0.0462498
ENSMUSG00000017548	Suz12	4.35533
ENSMUSG00000017550	Atad5	0.231808
ENSMUSG00000017561	Crlf3	2.36857
ENSMUSG00000017607	Tns4	0.127947
ENSMUSG00000017615	Tnfaip1	8.98018
ENSMUSG00000017631	Abr	0.678755
ENSMUSG00000017639	Rab11fip4	1.36139
ENSMUSG00000017652	Cd40	0.215902
ENSMUSG00000017664	Slc35c2	5.63863
ENSMUSG00000017667	Zfp334	0.266476
ENSMUSG00000017670	Elmo2	1.515
ENSMUSG00000017677	Wsb1	8.4287
ENSMUSG00000017679	Ttpal	3.36188
ENSMUSG00000017686	Rhot1	5.03946
ENSMUSG00000017692	Rhbdl3	0.0380812
ENSMUSG00000017697	Ada	1.11891
ENSMUSG00000017707	Serinc3	99.6276
ENSMUSG00000017713	Tha1	1.54057
ENSMUSG00000017715	Pgs1	1.89652
ENSMUSG00000017716	Birc5	0.260658
ENSMUSG00000017718	Afmid	50.9756
ENSMUSG00000017721	Pigt	8.52276
ENSMUSG00000017723	Wfdc2	2.50229
ENSMUSG00000017734	Dbndd2	0.32035
ENSMUSG00000017737	Mmp9	0.104549
ENSMUSG00000017740	Slc12a5	0.186856
ENSMUSG00000017747	Ghdc	4.76795
ENSMUSG00000017754	Pltp	24.0132
ENSMUSG00000017756	Slc12a7	16.0432
ENSMUSG00000017760	Ctsa	29.0556
ENSMUSG00000017764	Zswim1	1.14304
ENSMUSG00000017765	Slc12a4	6.23059
ENSMUSG00000017767	Spata25	0.129157
ENSMUSG00000017774	Myo1c	7.42027
ENSMUSG00000017776	Crk	15.497
ENSMUSG00000017778	Cox7c	63.8132
ENSMUSG00000017781	Pitpna	10.2051
ENSMUSG00000017801	Mlx	12.6152
ENSMUSG00000017802	Fam134c	18.6339
ENSMUSG00000017830	Dhx58	2.04859
ENSMUSG00000017831	Rab5a	16.8718
ENSMUSG00000017837	Nkiras2	3.95747
ENSMUSG00000017843	Ppp2r5c	7.36272
ENSMUSG00000017858	Ift52	5.8844
ENSMUSG00000017861	Mybl2	0.101548
ENSMUSG00000017868	Sgk2	11.9959
ENSMUSG00000017929	B4galt5	7.2307
ENSMUSG00000017950	Hnf4a	170.572
ENSMUSG00000017969	Ptgis	0.611045
ENSMUSG00000017978	Cadps2	1.76059
ENSMUSG00000017999	Ddx27	4.14734
ENSMUSG00000018001	Cyth3	0.616962
ENSMUSG00000018008	Cyth4	2.22103
ENSMUSG00000018012	Rac3	0.697959
ENSMUSG00000018040	Rrp7a	4.33963
ENSMUSG00000018042	Cyb5r3	91.2232
ENSMUSG00000018068	Ints2	0.429775
ENSMUSG00000018076	Med13l	1.24579
ENSMUSG00000018102	Hist1h2bc	75.2499
ENSMUSG00000018143	Mafk	2.92233
ENSMUSG00000018160	Med1	2.96798
ENSMUSG00000018166	Erbb3	23.3721
ENSMUSG00000018167	Stard3	3.90995
ENSMUSG00000018168	Ikzf3	0.053547
ENSMUSG00000018169	Mfng	0.658425
ENSMUSG00000018171	Vmp1	24.3105
ENSMUSG00000018189	Uchl5	4.60512
ENSMUSG00000018196	Glrx2	2.04833
ENSMUSG00000018199	Trove2	0.55289
ENSMUSG00000018209	Stk4	3.63478
ENSMUSG00000018211	Wfdc15b	0.152506
ENSMUSG00000018217	Pmp22	1.62356
ENSMUSG00000018238	Gdf9	0.263437
ENSMUSG00000018239	Zcchc10	1.2267
ENSMUSG00000018286	Psmb6	34.2528
ENSMUSG00000018287	Spag7	10.4161
ENSMUSG00000018293	Pfn1	38.9739
ENSMUSG00000018322	Tomm34	2.63825
ENSMUSG00000018326	Ywhab	26.192
ENSMUSG00000018334	Ksr1	0.465422
ENSMUSG00000018339	Gpx3	3.07073
ENSMUSG00000018340	Anxa6	48.8484
ENSMUSG00000018341	Il12rb2	0.0434665
ENSMUSG00000018347	Zkscan6	1.28557
ENSMUSG00000018362	Kpna2	4.44269
ENSMUSG00000018363	Smurf2	8.4962
ENSMUSG00000018372	Cep95	1.04641
ENSMUSG00000018377	Vezf1	3.08212
ENSMUSG00000018378	Cuedc1	0.343926
ENSMUSG00000018379	Srsf1	12.4719
ENSMUSG00000018381	Abi3	0.90012
ENSMUSG00000018387	Shroom1	7.59192
ENSMUSG00000018395	Kif3a	0.750993
ENSMUSG00000018398	42986	0.841727
ENSMUSG00000018401	Mtmr4	9.96579
ENSMUSG00000018405	Mrm1	0.89793
ENSMUSG00000018411	Mapt	0.532329
ENSMUSG00000018412	Kansl1	4.49969
ENSMUSG00000018415	Gid4	6.26792
ENSMUSG00000018417	Myo1b	21.674
ENSMUSG00000018425	Dhx40	8.05661
ENSMUSG00000018427	Ypel2	4.43699
ENSMUSG00000018428	Akap1	26.3614
ENSMUSG00000018433	Nol11	2.04059
ENSMUSG00000018442	Derl2	7.16599
ENSMUSG00000018446	C1qbp	17.1711
ENSMUSG00000018449	Rpain	3.10641
ENSMUSG00000018459	Slc13a3	4.80615
ENSMUSG00000018470	Kcnab3	0.106051
ENSMUSG00000018474	Chd3	13.249
ENSMUSG00000018476	Kdm6b	3.25257
ENSMUSG00000018481	Appbp2	3.54995
ENSMUSG00000018486	Wnt9b	0.292092
ENSMUSG00000018501	Ncor1	8.62717
ENSMUSG00000018507	Trpv2	0.450412
ENSMUSG00000018509	Cenpv	4.1254
ENSMUSG00000018537	Pcgf2	1.02937
ENSMUSG00000018541	Cwc25	2.09694
ENSMUSG00000018547	Pip4k2b	4.36265
ENSMUSG00000018548	Trim37	1.52225
ENSMUSG00000018559	Ctdnep1	10.2392
ENSMUSG00000018565	Elp5	5.9161
ENSMUSG00000018566	Slc2a4	0.450817
ENSMUSG00000018567	Gabarap	78.6107
ENSMUSG00000018569	Cldn7	0.107993
ENSMUSG00000018572	Phf23	5.16613
ENSMUSG00000018574	Acadvl	106.825
ENSMUSG00000018581	Dnah11	0.00574108
ENSMUSG00000018583	G3bp1	6.14751
ENSMUSG00000018585	Atox1	98.5263
ENSMUSG00000018593	Sparc	18.4347
ENSMUSG00000018599	Mief2	5.81811
ENSMUSG00000018604	Tbx3	2.57284
ENSMUSG00000018623	Mmp7	0.223715
ENSMUSG00000018648	Dusp14	0.714178
ENSMUSG00000018651	Tada2a	0.987685
ENSMUSG00000018654	Ikzf1	0.718482
ENSMUSG00000018659	Pnpo	29.0794
ENSMUSG00000018661	Cog1	3.25355
ENSMUSG00000018666	Cbx1	4.07867
ENSMUSG00000018669	Cdk5rap3	10.2485
ENSMUSG00000018672	Copz2	5.63939
ENSMUSG00000018677	Slc25a39	134.097
ENSMUSG00000018678	Sp2	1.17645
ENSMUSG00000018697	Aatf	2.90324
ENSMUSG00000018707	Dync1h1	11.2052
ENSMUSG00000018727	Cpsf4l	1.58555
ENSMUSG00000018733	Pex12	3.61193
ENSMUSG00000018736	Ndel1	8.50237
ENSMUSG00000018740	Slc25a35	0.414954
ENSMUSG00000018750	Zbtb4	1.84356
ENSMUSG00000018752	Tnfsfm13	1.217
ENSMUSG00000018761	Mpdu1	14.636
ENSMUSG00000018765	Fxr2	8.72562
ENSMUSG00000018770	Atp5g3	137.086
ENSMUSG00000018774	Cd68	11.37
ENSMUSG00000018796	Acsl1	102.806
ENSMUSG00000018800	Abca5	0.646081
ENSMUSG00000018809	Smyd4	0.486221
ENSMUSG00000018819	Lsp1	0.404797
ENSMUSG00000018820	Zfyve27	2.06526
ENSMUSG00000018821	Avpi1	14.3294
ENSMUSG00000018822	Sfrp5	0.0678965
ENSMUSG00000018830	Myh11	0.331652
ENSMUSG00000018841	Rad51d	2.74697
ENSMUSG00000018844	Fndc8	0.0401786
ENSMUSG00000018845	Unc45b	0.533066
ENSMUSG00000018846	Pank3	13.5857
ENSMUSG00000018848	Rars	6.93535
ENSMUSG00000018849	Wwc1	8.50406
ENSMUSG00000018858	Ict1	4.38767
ENSMUSG00000018861	Fdxr	4.09334
ENSMUSG00000018868	Pnpla5	0.187811
ENSMUSG00000018882	Mrpl45	6.10689
ENSMUSG00000018899	Irf1	6.73819
ENSMUSG00000018900	Slc22a5	19.8085
ENSMUSG00000018906	P4ha2	1.24837
ENSMUSG00000018909	Arrb1	2.1245
ENSMUSG00000018920	Cxcl16	3.39462
ENSMUSG00000018921	Pelp1	2.60203
ENSMUSG00000018923	Med11	4.38509
ENSMUSG00000018927	Ccl6	7.6424
ENSMUSG00000018930	Ccl4	0.0847632
ENSMUSG00000018931	Natd1	1.73494
ENSMUSG00000018932	Map2k3	14.8701
ENSMUSG00000018965	Ywhah	8.88464
ENSMUSG00000018974	Sart3	2.17163
ENSMUSG00000018983	E2f2	0.208166
ENSMUSG00000018986	Slfn3	0.0965971
ENSMUSG00000018995	Nars2	2.7973
ENSMUSG00000018999	Slc35b4	2.50919
ENSMUSG00000019039	Dalrd3	9.48349
ENSMUSG00000019054	Fis1	20.5242
ENSMUSG00000019055	Plod1	8.94232
ENSMUSG00000019066	Rab3d	1.98373
ENSMUSG00000019080	Mfsd3	2.56132
ENSMUSG00000019082	Slc25a22	36.2684
ENSMUSG00000019087	Atp6ap1	24.4084
ENSMUSG00000019088	Dnase1l1	1.45456
ENSMUSG00000019102	Aldh3a1	0.0431992
ENSMUSG00000019122	Ccl9	13.5397
ENSMUSG00000019124	Scrn1	0.0113218
ENSMUSG00000019132	BC005537	49.5189
ENSMUSG00000019139	Isyna1	9.31404
ENSMUSG00000019143	Hars2	4.45172
ENSMUSG00000019158	Tmem160	10.7243
ENSMUSG00000019173	Rab5c	33.919
ENSMUSG00000019179	Mdh2	49.9489
ENSMUSG00000019188	H13	10.7132
ENSMUSG00000019189	Rnf145	2.54826
ENSMUSG00000019194	Scn1b	1.43515
ENSMUSG00000019210	Atp6v1e1	17.4353
ENSMUSG00000019214	Chtf18	0.051193
ENSMUSG00000019230	Lhx9	0.00337971
ENSMUSG00000019232	Etnppl	26.4458
ENSMUSG00000019235	Rps6kl1	0.125004
ENSMUSG00000019254	Ppp1r12c	4.19585
ENSMUSG00000019256	Ahr	4.05294
ENSMUSG00000019261	Map1s	1.01656
ENSMUSG00000019278	Dpep1	0.291402
ENSMUSG00000019295	Tmem129	4.64171
ENSMUSG00000019297	Nop9	12.1124
ENSMUSG00000019302	Atp6v0a1	6.09417
ENSMUSG00000019303	Psmc3ip	0.0942533
ENSMUSG00000019312	Grb7	20.6973
ENSMUSG00000019320	Noxo1	0.0750125
ENSMUSG00000019326	Aoc3	0.019376
ENSMUSG00000019338	Zfp687	1.60491
ENSMUSG00000019362	D8Ertd738e	55.5978
ENSMUSG00000019368	Sec14l4	91.9246
ENSMUSG00000019370	Calm3	12.3576
ENSMUSG00000019373	Cops3	8.32277
ENSMUSG00000019428	Fkbp8	40.3822
ENSMUSG00000019432	Ddx39b	13.3782
ENSMUSG00000019433	Gipc1	3.33013
ENSMUSG00000019437	Tlcd1	7.15498
ENSMUSG00000019461	Plscr3	1.73839
ENSMUSG00000019464	Ptger1	2.0616
ENSMUSG00000019467	Arhgef25	0.371822
ENSMUSG00000019470	Xab2	3.69004
ENSMUSG00000019471	Cdc37	24.7301
ENSMUSG00000019478	Rab4a	16.0102
ENSMUSG00000019487	Trip10	2.23148
ENSMUSG00000019494	Cops6	25.6798
ENSMUSG00000019505	Ubb	183.45
ENSMUSG00000019518	Ap4m1	2.58206
ENSMUSG00000019528	Gyg	1.50603
ENSMUSG00000019539	Rcn3	1.9751
ENSMUSG00000019558	Slc6a8	1.36504
ENSMUSG00000019564	Arid3a	1.02343
ENSMUSG00000019577	Pdk4	11.9044
ENSMUSG00000019578	Ubxn6	6.06007
ENSMUSG00000019579	Mydgf	19.3388
ENSMUSG00000019590	Cyb561	1.12765
ENSMUSG00000019647	Sema6a	0.876736
ENSMUSG00000019659	Ccdc12	3.41182
ENSMUSG00000019689	1110001J03Rik	19.7658
ENSMUSG00000019699	Akt3	0.909033
ENSMUSG00000019710	Mrpl24	16.3187
ENSMUSG00000019715	Gle1	4.31855
ENSMUSG00000019718	L3hypdh	7.62063
ENSMUSG00000019726	Lyst	2.88942
ENSMUSG00000019731	Slc35e1	11.8751
ENSMUSG00000019732	Calr3	0.735741
ENSMUSG00000019734	Tmc4	0.898353
ENSMUSG00000019737	Syne4	0.433936
ENSMUSG00000019738	Polr2i	8.27604
ENSMUSG00000019756	Prl8a1	1.93974
ENSMUSG00000019761	Krt10	0.288595
ENSMUSG00000019762	Iyd	56.8395
ENSMUSG00000019763	Rmnd1	4.41514
ENSMUSG00000019768	Esr1	3.36499
ENSMUSG00000019773	Fbxo5	0.279654
ENSMUSG00000019774	Mtrf1l	0.942784
ENSMUSG00000019777	Hdac2	3.32018
ENSMUSG00000019779	Frk	1.05439
ENSMUSG00000019782	Rwdd1	11.4228
ENSMUSG00000019785	Clvs2	0.0209571
ENSMUSG00000019789	Hey2	0.0550253
ENSMUSG00000019790	Stxbp5	1.34371
ENSMUSG00000019791	Hint3	15.1613
ENSMUSG00000019792	Trmt11	1.58053
ENSMUSG00000019794	Katna1	5.03101
ENSMUSG00000019795	Pcmt1	5.72575
ENSMUSG00000019796	Lrp11	0.368062
ENSMUSG00000019797	1700021F05Rik	5.22861
ENSMUSG00000019802	Sec63	15.1671
ENSMUSG00000019804	Snx3	30.3427
ENSMUSG00000019806	Aig1	0.90004
ENSMUSG00000019808	Adat2	1.58136
ENSMUSG00000019809	Pex3	3.66975
ENSMUSG00000019810	Fuca2	0.93051
ENSMUSG00000019813	Cep57l1	0.36514
ENSMUSG00000019814	Ltv1	5.63027
ENSMUSG00000019817	Plagl1	0.104717
ENSMUSG00000019818	Cd164	58.142
ENSMUSG00000019820	Utrn	3.20662
ENSMUSG00000019822	Smpd2	6.25825
ENSMUSG00000019823	Mical1	0.124812
ENSMUSG00000019826	Zbtb24	2.892
ENSMUSG00000019831	Wasf1	0.538396
ENSMUSG00000019832	Rab32	8.9405
ENSMUSG00000019837	Gtf3c6	7.17655
ENSMUSG00000019838	Slc16a10	16.5209
ENSMUSG00000019841	Rev3l	1.43192
ENSMUSG00000019842	Traf3ip2	0.490871
ENSMUSG00000019843	Fyn	2.13093
ENSMUSG00000019845	Tube1	0.0881819
ENSMUSG00000019846	Lama4	0.588734
ENSMUSG00000019849	Prep	10.7088
ENSMUSG00000019850	Tnfaip3	0.474393
ENSMUSG00000019851	Perp	46.864
ENSMUSG00000019853	Hebp2	0.110101
ENSMUSG00000019854	Reps1	2.5723
ENSMUSG00000019856	Fam184a	0.0702607
ENSMUSG00000019857	Asf1a	2.52298
ENSMUSG00000019861	Gopc	6.0304
ENSMUSG00000019863	Qrsl1	0.75563
ENSMUSG00000019864	Rtn4ip1	4.60113
ENSMUSG00000019866	Aim1	6.01215
ENSMUSG00000019868	Vta1	4.08801
ENSMUSG00000019872	Smpdl3a	22.2573
ENSMUSG00000019873	Reep3	22.4127
ENSMUSG00000019874	Fabp7	1.68674
ENSMUSG00000019876	Pkib	0.434415
ENSMUSG00000019877	Serinc1	34.3336
ENSMUSG00000019878	Hsf2	6.30367
ENSMUSG00000019880	Rspo3	1.19046
ENSMUSG00000019883	Echdc1	11.4417
ENSMUSG00000019889	Ptprk	9.4262
ENSMUSG00000019891	Dcbld1	0.556259
ENSMUSG00000019897	Ccdc59	2.11386
ENSMUSG00000019899	Lama2	0.137622
ENSMUSG00000019906	Lin7a	2.58051
ENSMUSG00000019907	Ppp1r12a	4.21569
ENSMUSG00000019916	P4ha1	2.9928
ENSMUSG00000019917	42988	4.34164
ENSMUSG00000019920	Lims1	2.42408
ENSMUSG00000019923	Zwint	9.63754
ENSMUSG00000019927	Ube2d1	1.76121
ENSMUSG00000019929	Dcn	65.9695
ENSMUSG00000019935	Slc17a8	0.743512
ENSMUSG00000019942	Cdk1	0.408343
ENSMUSG00000019943	Atp2b1	5.34507
ENSMUSG00000019944	Rhobtb1	12.7248
ENSMUSG00000019945	1700040L02Rik	0.599345
ENSMUSG00000019947	Arid5b	12.2339
ENSMUSG00000019948	Actr6	6.03622
ENSMUSG00000019951	Uhrf1bp1l	10.3366
ENSMUSG00000019952	Poc1b	1.00854
ENSMUSG00000019960	Dusp6	14.8842
ENSMUSG00000019961	Tmpo	4.22969
ENSMUSG00000019966	Kitl	0.761302
ENSMUSG00000019969	Psen1	11.4436
ENSMUSG00000019970	Sgk1	4.0229
ENSMUSG00000019971	Cep290	0.412832
ENSMUSG00000019975	Ikbip	0.355743
ENSMUSG00000019977	Hbs1l	9.3543
ENSMUSG00000019978	Epb4.1l2	3.14493
ENSMUSG00000019979	Apaf1	0.467116
ENSMUSG00000019984	Med23	1.52357
ENSMUSG00000019986	Ahi1	0.203762
ENSMUSG00000019987	Arg1	696.495
ENSMUSG00000019988	Nedd1	3.94884
ENSMUSG00000019989	Enpp3	8.72072
ENSMUSG00000019990	Pde7b	0.612639
ENSMUSG00000019992	Mtfr2	0.0813961
ENSMUSG00000019996	Map7	5.32238
ENSMUSG00000019997	Ctgf	4.39554
ENSMUSG00000019998	Stx7	7.04194
ENSMUSG00000020003	Pex7	22.4914
ENSMUSG00000020009	Ifngr1	7.64559
ENSMUSG00000020010	Vnn3	66.1703
ENSMUSG00000020014	Cfap54	0.0386538
ENSMUSG00000020015	Cdk17	4.54081
ENSMUSG00000020017	Hal	83.1238
ENSMUSG00000020018	Snrpf	2.60292
ENSMUSG00000020019	Ntn4	2.99383
ENSMUSG00000020021	Fgd6	6.07128
ENSMUSG00000020022	Ndufa12	19.1914
ENSMUSG00000020023	Tmcc3	2.48553
ENSMUSG00000020024	Cep83	1.8394
ENSMUSG00000020027	Socs2	5.39915
ENSMUSG00000020029	Nudt4	50.0662
ENSMUSG00000020032	Nuak1	0.467681
ENSMUSG00000020034	Tcp11l2	8.25492
ENSMUSG00000020037	Rfx4	0.637928
ENSMUSG00000020038	Cry1	16.8874
ENSMUSG00000020042	Btbd11	0.245741
ENSMUSG00000020044	Timp3	4.06014
ENSMUSG00000020048	Hsp90b1	136.632
ENSMUSG00000020051	Pah	489.365
ENSMUSG00000020053	Igf1	61.9926
ENSMUSG00000020056	Ccdc53	2.11783
ENSMUSG00000020057	Dram1	0.384951
ENSMUSG00000020059	Sycp3	0.0858207
ENSMUSG00000020063	Sirt1	2.27769
ENSMUSG00000020064	Herc4	8.24683
ENSMUSG00000020069	Hnrnph3	3.33877
ENSMUSG00000020070	Rufy2	0.455029
ENSMUSG00000020072	Pbld2	65.8206
ENSMUSG00000020074	Ccar1	9.84577
ENSMUSG00000020075	Ddx21	8.83111
ENSMUSG00000020076	Ddx50	15.3536
ENSMUSG00000020077	Srgn	3.56487
ENSMUSG00000020078	Vps26a	9.48238
ENSMUSG00000020079	Supv3l1	4.39329
ENSMUSG00000020080	Hkdc1	0.0357252
ENSMUSG00000020083	2010107G23Rik	0.113731
ENSMUSG00000020085	Aifm2	7.95696
ENSMUSG00000020086	H2afy2	0.360299
ENSMUSG00000020087	Tysnd1	16.6586
ENSMUSG00000020088	Sar1a	25.2815
ENSMUSG00000020089	Ppa1	36.7204
ENSMUSG00000020091	Eif4ebp2	48.1068
ENSMUSG00000020092	Pald1	3.19561
ENSMUSG00000020097	Sgpl1	9.81519
ENSMUSG00000020098	Pcbd1	197.468
ENSMUSG00000020099	Unc5b	0.902654
ENSMUSG00000020100	Slc29a3	0.994431
ENSMUSG00000020101	4632428N05Rik	2.31764
ENSMUSG00000020102	Slc16a7	26.6268
ENSMUSG00000020105	Lrig3	1.55352
ENSMUSG00000020107	Anapc16	5.69774
ENSMUSG00000020108	Ddit4	23.2019
ENSMUSG00000020109	Dnajb12	13.7723
ENSMUSG00000020111	Micu1	1.61857
ENSMUSG00000020114	Cand1	6.73917
ENSMUSG00000020115	Tbk1	6.6227
ENSMUSG00000020116	Pno1	11.001
ENSMUSG00000020120	Plek	0.830517
ENSMUSG00000020121	Srgap1	0.150835
ENSMUSG00000020122	Egfr	29.2672
ENSMUSG00000020123	Avpr1a	9.79307
ENSMUSG00000020124	Usp15	12.2362
ENSMUSG00000020128	Vps54	5.36507
ENSMUSG00000020130	Tbc1d15	13.1613
ENSMUSG00000020131	Pcsk4	2.86823
ENSMUSG00000020132	Rab21	12.8379
ENSMUSG00000020133	2310011J03Rik	5.12032
ENSMUSG00000020134	Peli1	2.37652
ENSMUSG00000020135	Apc2	0.0172357
ENSMUSG00000020137	Thap2	2.51378
ENSMUSG00000020140	Lgr5	0.162397
ENSMUSG00000020142	Slc1a4	0.994642
ENSMUSG00000020143	Dock2	0.515841
ENSMUSG00000020149	Rab1	30.4732
ENSMUSG00000020150	Gamt	69.4745
ENSMUSG00000020152	Actr2	16.5266
ENSMUSG00000020153	Ndufs7	25.7487
ENSMUSG00000020154	Ptprb	10.633
ENSMUSG00000020156	Mum1	0.788187
ENSMUSG00000020160	Meis1	0.240656
ENSMUSG00000020163	Uqcr11	137.162
ENSMUSG00000020166	Cnot2	6.27522
ENSMUSG00000020167	Tcf3	2.8258
ENSMUSG00000020170	Frs2	3.67073
ENSMUSG00000020171	Yeats4	7.55364
ENSMUSG00000020173	Cobl	3.02377
ENSMUSG00000020175	Rab36	0.128583
ENSMUSG00000020176	Grb10	0.43642
ENSMUSG00000020178	Adora2a	0.541013
ENSMUSG00000020180	Snrpd3	6.33879
ENSMUSG00000020182	Ddc	14.0832
ENSMUSG00000020183	Cpm	1.22437
ENSMUSG00000020184	Mdm2	3.86613
ENSMUSG00000020185	E2f7	0.0722745
ENSMUSG00000020186	Csrp2	13.7785
ENSMUSG00000020189	Osbpl8	4.82288
ENSMUSG00000020190	Mknk2	40.4105
ENSMUSG00000020196	Cabin1	3.11449
ENSMUSG00000020198	Ap3d1	12.8793
ENSMUSG00000020205	Phlda1	35.9778
ENSMUSG00000020211	Sf3a2	4.16902
ENSMUSG00000020212	Mdm1	0.270746
ENSMUSG00000020219	Timm13	31.4545
ENSMUSG00000020220	Vps13d	4.28321
ENSMUSG00000020224	Llph	8.36829
ENSMUSG00000020225	Tmbim4	17.6393
ENSMUSG00000020226	Slc5a4b	0.0696818
ENSMUSG00000020227	Irak3	0.523015
ENSMUSG00000020228	Helb	2.39808
ENSMUSG00000020230	Prmt2	0.192
ENSMUSG00000020231	Dip2a	0.436252
ENSMUSG00000020232	Hmg20b	5.16186
ENSMUSG00000020234	4930404N11Rik	0.144101
ENSMUSG00000020235	Fzr1	2.04275
ENSMUSG00000020238	Ncln	15.6684
ENSMUSG00000020241	Col6a2	0.436778
ENSMUSG00000020246	Hcfc2	1.65413
ENSMUSG00000020248	Nfyb	3.37987
ENSMUSG00000020250	Txnrd1	33.4943
ENSMUSG00000020251	Glt8d2	0.0240746
ENSMUSG00000020253	Ppm1m	2.15933
ENSMUSG00000020255	D10Wsu102e	3.28212
ENSMUSG00000020256	Aldh1l2	0.0737609
ENSMUSG00000020257	Wdr82	6.99416
ENSMUSG00000020258	Glyctk	52.3527
ENSMUSG00000020260	Pofut2	6.41465
ENSMUSG00000020261	Slc36a1	4.8929
ENSMUSG00000020262	Adarb1	1.71774
ENSMUSG00000020263	Appl2	2.99232
ENSMUSG00000020265	Sumo3	17.2626
ENSMUSG00000020267	Hint1	148.785
ENSMUSG00000020268	Lyrm7	0.283027
ENSMUSG00000020271	Fbxw11	7.20132
ENSMUSG00000020272	Stk10	1.1543
ENSMUSG00000020273	Papolg	0.954846
ENSMUSG00000020275	Rel	1.07795
[truncated: 12,375 more rows]
