# Supplementary material for: The CCR4–NOT complex maintains liver homeostasis through mRNA deadenylation
Source: Life Sci Alliance. 2020 Apr 1;3(5):e201900494. doi: 10.26508/lsa.201900494 (PMC7119370; doi:10.26508/lsa.201900494)
Supplement: Supplementary file 5 [file LSA-2019-00494_TableS5.xlsx]

## Sheet: Sheet1
Table S5. FPKMs in livers from control mice. Lists of FPKMs in livers from control mice (averages of four mice). Ensemble gene IDs and gene symbols are also shown.
mRNA half-lives in livers from control mice
Ensembl ID	Gene Symbol	mRNA half-life (h)
ENSMUSG00000000001	Gnai3	6.48983
ENSMUSG00000000028	Cdc45	2.9517
ENSMUSG00000000049	Apoh	29.5768
ENSMUSG00000000056	Narf	3.53507
ENSMUSG00000000058	Cav2	5.20427
ENSMUSG00000000085	Scmh1	2.52684
ENSMUSG00000000088	Cox5a	9.56908
ENSMUSG00000000093	Tbx2	5.23476
ENSMUSG00000000120	Ngfr	10.3213
ENSMUSG00000000127	Fer	2.03733
ENSMUSG00000000131	Xpo6	2.82469
ENSMUSG00000000134	Tfe3	5.19966
ENSMUSG00000000142	Axin2	3.12232
ENSMUSG00000000148	Brat1	3.20521
ENSMUSG00000000149	Gna12	6.43896
ENSMUSG00000000154	Slc22a18	17.1365
ENSMUSG00000000159	Igsf5	7.99278
ENSMUSG00000000168	Dlat	16.6322
ENSMUSG00000000171	Sdhd	18.9676
ENSMUSG00000000184	Ccnd2	6.21079
ENSMUSG00000000194	Gpr107	2.18651
ENSMUSG00000000247	Lhx2	3.43183
ENSMUSG00000000253	Gmpr	0.964046
ENSMUSG00000000266	Mid2	2.69668
ENSMUSG00000000275	Trim25	2.94156
ENSMUSG00000000276	Dgke	5.94363
ENSMUSG00000000278	Scpep1	22.0254
ENSMUSG00000000282	Mnt	4.33641
ENSMUSG00000000290	Itgb2	10.5807
ENSMUSG00000000295	Hddc2	5.25337
ENSMUSG00000000296	Tpd52l1	40.5302
ENSMUSG00000000301	Pemt	8.1125
ENSMUSG00000000303	Cdh1	9.03311
ENSMUSG00000000317	Bcl6b	6.50829
ENSMUSG00000000325	Arvcf	3.01275
ENSMUSG00000000326	Comt	4.97166
ENSMUSG00000000339	Rtca	7.85018
ENSMUSG00000000340	Dbt	25.5079
ENSMUSG00000000346	Dazap2	11.6154
ENSMUSG00000000355	Mcts1	8.148
ENSMUSG00000000374	Trappc10	2.80778
ENSMUSG00000000378	Ccm2	5.66347
ENSMUSG00000000384	Tbrg4	4.33043
ENSMUSG00000000385	Tmprss2	3.42123
ENSMUSG00000000386	Mx1	6.0595
ENSMUSG00000000399	Ndufa9	12.483
ENSMUSG00000000409	Lck	11.0949
ENSMUSG00000000420	Galnt1	6.98675
ENSMUSG00000000439	Mkrn2	2.63956
ENSMUSG00000000440	Pparg	6.12031
ENSMUSG00000000441	Raf1	2.08358
ENSMUSG00000000486	2017-09-01	15.8214
ENSMUSG00000000489	Pdgfb	6.75709
ENSMUSG00000000530	Acvrl1	2.33566
ENSMUSG00000000531	Grasp	4.28992
ENSMUSG00000000532	Acvr1b	2.47516
ENSMUSG00000000538	Tom1l2	1.61106
ENSMUSG00000000552	Zfp385a	3.86084
ENSMUSG00000000555	Itga5	2.24038
ENSMUSG00000000561	Wdr77	3.27597
ENSMUSG00000000563	Atp5f1	21.7027
ENSMUSG00000000568	Hnrnpd	3.42098
ENSMUSG00000000579	Dynlt1c	2.54646
ENSMUSG00000000581	C1d	12.4417
ENSMUSG00000000600	Krit1	3.40762
ENSMUSG00000000605	Clcn4-2	15.0526
ENSMUSG00000000628	Hk2	1.79973
ENSMUSG00000000631	Myo18a	3.44731
ENSMUSG00000000673	Haao	6.258
ENSMUSG00000000682	Cd52	7.42354
ENSMUSG00000000686	Abhd15	2.23922
ENSMUSG00000000693	Loxl3	7.20705
ENSMUSG00000000708	Kat2b	30.3557
ENSMUSG00000000711	Rab5b	10.8166
ENSMUSG00000000732	Icosl	3.90487
ENSMUSG00000000739	Sult5a1	6.42464
ENSMUSG00000000743	Chmp1a	7.37542
ENSMUSG00000000751	Rpa1	3.8944
ENSMUSG00000000753	Serpinf1	21.698
ENSMUSG00000000759	Tubgcp3	2.60246
ENSMUSG00000000776	Polr3d	4.93643
ENSMUSG00000000782	Tcf7	3.3994
ENSMUSG00000000787	Ddx3x	3.2416
ENSMUSG00000000804	Usp32	2.18386
ENSMUSG00000000811	Txnrd3	2.74789
ENSMUSG00000000823	Znf512b	4.75452
ENSMUSG00000000826	Dnajc5	3.91351
ENSMUSG00000000827	Tpd52l2	3.65141
ENSMUSG00000000838	Fmr1	3.68874
ENSMUSG00000000876	Pxmp4	1.57312
ENSMUSG00000000881	Dlg3	1.63448
ENSMUSG00000000902	Smarcb1	2.17835
ENSMUSG00000000903	Vpreb3	21.8377
ENSMUSG00000000915	Hip1r	4.79711
ENSMUSG00000000916	Nsun5	4.09573
ENSMUSG00000000934	Top1mt	6.37994
ENSMUSG00000000948	Gm38393	10.2546
ENSMUSG00000000957	Mmp14	3.85829
ENSMUSG00000000958	Slc7a7	2.56131
ENSMUSG00000000959	Oxa1l	5.65835
ENSMUSG00000000976	Heatr6	3.21768
ENSMUSG00000001016	Ilf2	5.8207
ENSMUSG00000001017	Chtop	3.78461
ENSMUSG00000001018	Snapin	14.2262
ENSMUSG00000001029	Icam2	3.07154
ENSMUSG00000001034	Mapk7	4.00893
ENSMUSG00000001036	Epn2	2.4485
ENSMUSG00000001052	Sec24b	1.92791
ENSMUSG00000001053	N4bp3	3.3106
ENSMUSG00000001054	Rmnd5b	3.61792
ENSMUSG00000001056	Nhp2	16.3085
ENSMUSG00000001062	Vps9d1	3.09258
ENSMUSG00000001065	Zfp276	3.33559
ENSMUSG00000001082	Mfsd10	8.83554
ENSMUSG00000001089	Luzp1	2.72532
ENSMUSG00000001095	Slc13a2	0.82634
ENSMUSG00000001098	Kctd10	4.87815
ENSMUSG00000001100	Poldip2	13.6612
ENSMUSG00000001105	Ift20	5.32841
ENSMUSG00000001123	Lgals9	5.56295
ENSMUSG00000001127	Araf	6.3302
ENSMUSG00000001128	Cfp	5.2558
ENSMUSG00000001134	Uxt	5.15296
ENSMUSG00000001138	Cnnm3	3.0671
ENSMUSG00000001143	Lman2l	5.69483
ENSMUSG00000001150	Mcm3ap	2.94007
ENSMUSG00000001151	Pcnt	1.77411
ENSMUSG00000001155	Ftcd	7.9035
ENSMUSG00000001157	Gmcl1	10.6516
ENSMUSG00000001158	Snrnp27	4.17931
ENSMUSG00000001166	Oas1c	3.15903
ENSMUSG00000001173	Ocrl	6.83758
ENSMUSG00000001175	Calm1	7.27071
ENSMUSG00000001211	Agpat3	15.5707
ENSMUSG00000001227	Sema6b	9.6102
ENSMUSG00000001229	Dpp9	2.44378
ENSMUSG00000001240	Ramp2	5.47057
ENSMUSG00000001247	Lsr	5.34549
ENSMUSG00000001248	Gramd1a	6.74716
ENSMUSG00000001249	Hpn	9.8304
ENSMUSG00000001270	Ckb	5.72619
ENSMUSG00000001280	Sp1	2.24824
ENSMUSG00000001281	Itgb7	9.45198
ENSMUSG00000001285	Myg1	5.54803
ENSMUSG00000001288	Rarg	2.32245
ENSMUSG00000001289	Pfdn5	17.9657
ENSMUSG00000001300	Efnb2	3.7737
ENSMUSG00000001305	Rrp15	2.81401
ENSMUSG00000001313	Rnd2	14.8354
ENSMUSG00000001323	Srr	11.8078
ENSMUSG00000001348	Acp5	24.1118
ENSMUSG00000001366	Fbxo9	5.47795
ENSMUSG00000001376	Ccdc132	1.50556
ENSMUSG00000001380	Hars	5.84474
ENSMUSG00000001383	Zmat2	5.05848
ENSMUSG00000001415	Smg5	3.55885
ENSMUSG00000001416	Cct3	3.5569
ENSMUSG00000001418	Glmp	14.4709
ENSMUSG00000001419	Mef2d	4.59564
ENSMUSG00000001424	Snd1	6.56812
ENSMUSG00000001435	Col18a1	11.2011
ENSMUSG00000001436	Slc19a1	3.03977
ENSMUSG00000001440	Kpnb1	2.94714
ENSMUSG00000001441	Npepps	3.23988
ENSMUSG00000001467	Cyp51	13.4506
ENSMUSG00000001472	Tcf25	8.95228
ENSMUSG00000001473	Tubb6	8.25606
ENSMUSG00000001482	Def8	3.60684
ENSMUSG00000001507	Itga3	4.25047
ENSMUSG00000001518	Itfg2	2.28064
ENSMUSG00000001524	Gtf2h4	3.16179
ENSMUSG00000001525	Tubb5	3.42629
ENSMUSG00000001542	Ell2	2.73397
ENSMUSG00000001552	Jup	2.73294
ENSMUSG00000001555	Fkbp10	16.7458
ENSMUSG00000001569	Nom1	2.94333
ENSMUSG00000001576	Ergic1	10.3932
ENSMUSG00000001588	Acap1	5.61671
ENSMUSG00000001604	Tcea3	14.7683
ENSMUSG00000001627	Ifrd1	4.29292
ENSMUSG00000001630	Stk38l	1.75574
ENSMUSG00000001632	Brpf1	3.55293
ENSMUSG00000001642	Akr1b3	6.07824
ENSMUSG00000001663	Gstt1	18.501
ENSMUSG00000001665	Gstt3	5.13887
ENSMUSG00000001666	Ddt	13.2498
ENSMUSG00000001670	Tat	3.60549
ENSMUSG00000001674	Ddx18	4.71026
ENSMUSG00000001687	Ubl3	8.08043
ENSMUSG00000001700	Gramd3	1.68044
ENSMUSG00000001707	Eef1e1	3.09545
ENSMUSG00000001729	Akt1	9.58861
ENSMUSG00000001741	Il16	3.78536
ENSMUSG00000001750	Tcirg1	4.89742
ENSMUSG00000001751	Naglu	12.15
ENSMUSG00000001755	Coasy	33.2542
ENSMUSG00000001761	Smo	5.90091
ENSMUSG00000001763	Tspan33	5.16346
ENSMUSG00000001767	Crnkl1	3.07448
ENSMUSG00000001768	Rin2	1.13129
ENSMUSG00000001774	Chordc1	1.87765
ENSMUSG00000001783	Rtcb	7.26159
ENSMUSG00000001785	Pwp1	2.4843
ENSMUSG00000001786	Fbxo7	3.12618
ENSMUSG00000001794	Capns1	13.6254
ENSMUSG00000001802	Lrp3	7.69837
ENSMUSG00000001829	Clpb	18.5858
ENSMUSG00000001833	2017-09-07	4.35391
ENSMUSG00000001844	Zdhhc4	10.3135
ENSMUSG00000001847	Rac1	5.73052
ENSMUSG00000001855	Nup214	1.84092
ENSMUSG00000001870	Ltbp1	9.08428
ENSMUSG00000001891	Ugp2	15.5202
ENSMUSG00000001909	Trmt1	17.6891
ENSMUSG00000001910	Nacc1	3.93846
ENSMUSG00000001911	Nfix	6.1357
ENSMUSG00000001918	Slc1a5	4.59527
ENSMUSG00000001924	Uba1	6.66756
ENSMUSG00000001930	Vwf	14.5402
ENSMUSG00000001943	Vsig2	2.77098
ENSMUSG00000001946	Esam	4.68726
ENSMUSG00000001962	Fam50a	3.99421
ENSMUSG00000001964	Emd	6.50721
ENSMUSG00000001983	Taco1	3.69582
ENSMUSG00000001995	Sipa1l2	0.986783
ENSMUSG00000001998	Ap4e1	2.68433
ENSMUSG00000001999	Blvra	3.99642
ENSMUSG00000002010	Idh3g	5.53263
ENSMUSG00000002014	Ssr4	24.4693
ENSMUSG00000002017	Fam98a	3.23561
ENSMUSG00000002028	Kmt2a	3.81167
ENSMUSG00000002031	Ift46	4.1169
ENSMUSG00000002032	Tmem25	3.98811
ENSMUSG00000002033	Cd3g	7.88217
ENSMUSG00000002052	Supt6	3.81806
ENSMUSG00000002058	Unc119	7.40836
ENSMUSG00000002059	Rab34	12.1747
ENSMUSG00000002064	Sdf2	10.0628
ENSMUSG00000002102	Psmc3	4.86219
ENSMUSG00000002103	Acp2	4.33594
ENSMUSG00000002105	Slc39a13	4.17571
ENSMUSG00000002107	Celf2	3.66974
ENSMUSG00000002108	Nr1h3	3.52113
ENSMUSG00000002109	Ddb2	5.00637
ENSMUSG00000002111	Spi1	3.06184
ENSMUSG00000002129	Sf3a1	2.17813
ENSMUSG00000002147	Stat6	2.60067
ENSMUSG00000002205	Vrk3	2.87235
ENSMUSG00000002210	Smg9	1.97288
ENSMUSG00000002221	Paxip1	5.50678
ENSMUSG00000002222	Rmnd5a	5.45349
ENSMUSG00000002227	Mov10	3.35306
ENSMUSG00000002233	Rhoc	14.9473
ENSMUSG00000002249	Tead3	4.18358
ENSMUSG00000002250	Ppard	1.40942
ENSMUSG00000002265	Peg3	3.21583
ENSMUSG00000002279	Lmf1	13.3327
ENSMUSG00000002280	Narfl	2.83032
ENSMUSG00000002289	Angptl4	5.14202
ENSMUSG00000002307	Daxx	3.63487
ENSMUSG00000002308	Cd320	2.86925
ENSMUSG00000002319	Ipo4	10.1603
ENSMUSG00000002320	Tm9sf1	19.2366
ENSMUSG00000002324	Rec8	7.44923
ENSMUSG00000002325	Irf9	3.95911
ENSMUSG00000002326	Gmpr2	3.6324
ENSMUSG00000002329	Mdp1	8.16091
ENSMUSG00000002332	Dhrs1	7.3112
ENSMUSG00000002342	Tmem161a	7.3911
ENSMUSG00000002343	Armc6	2.46869
ENSMUSG00000002345	2310045N01Rik	5.89602
ENSMUSG00000002346	Slc25a42	3.15665
ENSMUSG00000002365	Snx9	6.0874
ENSMUSG00000002372	Ranbp3	2.36415
ENSMUSG00000002379	Ndufa11	7.98072
ENSMUSG00000002393	Nr2f6	4.48598
ENSMUSG00000002395	Use1	12.1334
ENSMUSG00000002396	Ocel1	4.1724
ENSMUSG00000002409	Dyrk1b	2.94123
ENSMUSG00000002413	Braf	2.44824
ENSMUSG00000002416	Ndufb2	18.0344
ENSMUSG00000002428	Hltf	4.21959
ENSMUSG00000002455	Prpf6	2.34999
ENSMUSG00000002458	Rgs19	3.13485
ENSMUSG00000002477	Snrpd1	2.10664
ENSMUSG00000002486	Tchp	3.59879
ENSMUSG00000002496	Tsc2	13.4049
ENSMUSG00000002504	Slc9a3r2	2.27317
ENSMUSG00000002524	Puf60	3.21988
ENSMUSG00000002546	Golga2	3.52902
ENSMUSG00000002550	Uck1	4.75834
ENSMUSG00000002578	Ikzf4	5.13092
ENSMUSG00000002588	Pon1	44.4369
ENSMUSG00000002602	Axl	3.97755
ENSMUSG00000002603	Tgfb1	18.2025
ENSMUSG00000002608	Ccdc97	4.46135
ENSMUSG00000002617	Zfp40	1.74141
ENSMUSG00000002625	Akap8l	4.14343
ENSMUSG00000002635	Pdcd2l	3.00783
ENSMUSG00000002658	Gtf2f1	3.30821
ENSMUSG00000002660	Clpp	7.80534
ENSMUSG00000002661	Alkbh7	2.01158
ENSMUSG00000002668	Dennd1c	3.91292
ENSMUSG00000002679	Med6	2.96956
ENSMUSG00000002699	Lcp2	0.702609
ENSMUSG00000002718	Cse1l	3.20892
ENSMUSG00000002728	Naa20	4.24923
ENSMUSG00000002731	Prkra	6.13484
ENSMUSG00000002732	Fkbp7	23.9997
ENSMUSG00000002741	Ykt6	5.12431
ENSMUSG00000002748	Baz1b	2.30117
ENSMUSG00000002763	Pex6	10.9755
ENSMUSG00000002767	Mrpl2	8.55212
ENSMUSG00000002768	Mea1	9.09176
ENSMUSG00000002769	Gnmt	11.3322
ENSMUSG00000002778	Kdelr1	10.855
ENSMUSG00000002781	Tmem143	2.8353
ENSMUSG00000002797	Ggct	4.93405
ENSMUSG00000002803	Btbd6	2.26415
ENSMUSG00000002804	Nudt14	13.2245
ENSMUSG00000002812	Flii	6.7696
ENSMUSG00000002814	Top3a	2.58267
ENSMUSG00000002820	Atg4d	2.55618
ENSMUSG00000002825	Qtrt1	5.18153
ENSMUSG00000002831	Plin4	2.89218
ENSMUSG00000002833	Hdgfrp2	3.27698
ENSMUSG00000002835	Chaf1a	3.74816
ENSMUSG00000002844	Adprh	2.97783
ENSMUSG00000002845	Tmem39a	3.0427
ENSMUSG00000002846	Timmdc1	5.2938
ENSMUSG00000002847	Pla1a	38.8701
ENSMUSG00000002870	Mcm2	4.41406
ENSMUSG00000002871	Tpra1	3.25932
ENSMUSG00000002881	Nab1	14.3619
ENSMUSG00000002885	Adgre5	4.04304
ENSMUSG00000002897	Il17ra	3.9816
ENSMUSG00000002908	Kcnn1	6.80289
ENSMUSG00000002910	Arrdc2	5.95618
ENSMUSG00000002944	Cd36	19.6218
ENSMUSG00000002948	Map2k7	3.91822
ENSMUSG00000002949	Timm44	5.29722
ENSMUSG00000002957	Ap2a2	2.76458
ENSMUSG00000002963	Pnkp	3.68016
ENSMUSG00000002968	Med25	9.71534
ENSMUSG00000002981	Clptm1	19.9108
ENSMUSG00000002984	Tomm40	5.40955
ENSMUSG00000002992	Apoc2	15.7229
ENSMUSG00000002996	Hbp1	2.63976
ENSMUSG00000003031	Cdkn1b	9.51934
ENSMUSG00000003033	Ap1m1	2.59773
ENSMUSG00000003037	Rab8a	4.15396
ENSMUSG00000003039	Fam32a	5.50754
ENSMUSG00000003053	Cyp2c29	18.3567
ENSMUSG00000003062	Stard3nl	24.2148
ENSMUSG00000003068	Stk11	8.62059
ENSMUSG00000003072	Atp5d	21.984
ENSMUSG00000003099	Ppp5c	7.21644
ENSMUSG00000003119	Cdk12	2.72377
ENSMUSG00000003123	Lipe	1.99312
ENSMUSG00000003131	Pafah1b2	3.76321
ENSMUSG00000003134	Tbc1d8	2.82389
ENSMUSG00000003135	Cnot11	5.9186
ENSMUSG00000003154	Foxj2	7.26588
ENSMUSG00000003161	Sri	7.01151
ENSMUSG00000003166	Dgcr2	2.08778
ENSMUSG00000003184	Irf3	3.38739
ENSMUSG00000003190	Bcl2l12	5.37638
ENSMUSG00000003198	Zfp959	5.95568
ENSMUSG00000003199	Mpnd	11.4625
ENSMUSG00000003200	Sh3gl1	3.49009
ENSMUSG00000003206	Ebi3	5.95058
ENSMUSG00000003208	Ccdc94	2.04904
ENSMUSG00000003226	Ranbp2	2.53289
ENSMUSG00000003228	Grk5	2.35003
ENSMUSG00000003233	Dvl3	4.28144
ENSMUSG00000003234	Abcf3	2.73551
ENSMUSG00000003235	Eif2b5	5.07391
ENSMUSG00000003269	Cyth2	7.94379
ENSMUSG00000003283	Hck	1.79299
ENSMUSG00000003299	Mrpl4	3.92145
ENSMUSG00000003308	Keap1	3.85998
ENSMUSG00000003316	Glg1	7.58369
ENSMUSG00000003344	Btbd2	4.26897
ENSMUSG00000003345	Csnk1g2	15.0328
ENSMUSG00000003348	Mob3a	4.57838
ENSMUSG00000003355	Fkbp11	7.6312
ENSMUSG00000003360	Ddx23	7.41878
ENSMUSG00000003363	Pld3	7.70162
ENSMUSG00000003378	Grik5	11.4181
ENSMUSG00000003380	Rabac1	14.6599
ENSMUSG00000003382	Etv3	15.7322
ENSMUSG00000003402	Prkcsh	22.6764
ENSMUSG00000003420	Fcgrt	9.24753
ENSMUSG00000003421	Nosip	2.70822
ENSMUSG00000003423	Pih1d1	5.8683
ENSMUSG00000003429	Rps11	35.1014
ENSMUSG00000003435	Supt5	4.50684
ENSMUSG00000003437	Paf1	3.82944
ENSMUSG00000003438	Timm50	8.10743
ENSMUSG00000003444	Med29	4.05328
ENSMUSG00000003458	Ncstn	40.2372
ENSMUSG00000003464	Pex19	6.24008
ENSMUSG00000003500	Impdh1	6.42752
ENSMUSG00000003518	Dusp3	6.50871
ENSMUSG00000003526	Prodh	5.73321
ENSMUSG00000003527	Dgcr14	2.45606
ENSMUSG00000003528	Slc25a1	8.95683
ENSMUSG00000003531	Dgcr6	38.1103
ENSMUSG00000003546	Klc4	3.63127
ENSMUSG00000003549	Ercc1	3.46122
ENSMUSG00000003555	Cyp17a1	3.85105
ENSMUSG00000003559	As3mt	5.29051
ENSMUSG00000003573	Homer3	4.33329
ENSMUSG00000003575	Crtc1	2.15918
ENSMUSG00000003581	Rnf215	7.58806
ENSMUSG00000003585	Sec14l2	4.81581
ENSMUSG00000003604	Aven	4.03152
ENSMUSG00000003617	Cp	15.3535
ENSMUSG00000003623	Crot	3.37475
ENSMUSG00000003644	Rps6ka1	3.05313
ENSMUSG00000003660	Snrnp200	5.09013
ENSMUSG00000003662	Ciao1	4.07781
ENSMUSG00000003680	Taf6l	5.09489
ENSMUSG00000003721	Insig2	2.12445
ENSMUSG00000003731	Kpna6	2.81514
ENSMUSG00000003746	Man1a	34.0821
ENSMUSG00000003762	Adck4	7.61785
ENSMUSG00000003778	Brd8	2.06248
ENSMUSG00000003779	Kif20a	13.1305
ENSMUSG00000003808	Farsa	3.69575
ENSMUSG00000003809	Gcdh	38.1127
ENSMUSG00000003810	Mast2	2.122
ENSMUSG00000003812	Dnase2a	5.71764
ENSMUSG00000003813	Rad23a	4.68774
ENSMUSG00000003814	Calr	22.0173
ENSMUSG00000003824	Syce2	3.50545
ENSMUSG00000003847	Nfat5	2.88087
ENSMUSG00000003848	Nob1	2.69419
ENSMUSG00000003849	Nqo1	10.6931
ENSMUSG00000003865	Gys1	2.20659
ENSMUSG00000003868	Ruvbl2	2.28695
ENSMUSG00000003873	Bax	28.6285
ENSMUSG00000003923	Tfam	3.01198
ENSMUSG00000003929	Zfp81	3.25693
ENSMUSG00000003948	Mmd	16.1135
ENSMUSG00000003949	Hlf	4.12765
ENSMUSG00000003955	Fam162a	7.51961
ENSMUSG00000003970	Rpl8	38.4896
ENSMUSG00000003992	Ssbp2	4.32453
ENSMUSG00000004018	Fancl	2.40874
ENSMUSG00000004032	Gstm5	22.2634
ENSMUSG00000004035	Gstm7	10.0144
ENSMUSG00000004038	Gstm3	47.3612
ENSMUSG00000004040	Stat3	2.887
ENSMUSG00000004043	Stat5a	3.06733
ENSMUSG00000004044	Ptrf	6.78551
ENSMUSG00000004054	Map3k11	6.05114
ENSMUSG00000004056	Akt2	7.90293
ENSMUSG00000004069	Dnaja3	7.39229
ENSMUSG00000004070	Hmox2	3.67423
ENSMUSG00000004071	Cdip1	3.20549
ENSMUSG00000004085	Zak	2.76038
ENSMUSG00000004096	Cwc15	6.10677
ENSMUSG00000004098	Col5a3	5.45823
ENSMUSG00000004099	Dnmt1	2.27775
ENSMUSG00000004100	Ppan	11.3158
ENSMUSG00000004105	Angptl2	15.0041
ENSMUSG00000004127	Trmt10a	11.4588
ENSMUSG00000004187	Kifc2	3.83594
ENSMUSG00000004207	Psap	38.5623
ENSMUSG00000004221	Ikbkg	3.42411
ENSMUSG00000004233	Wars2	5.61196
ENSMUSG00000004263	Atn1	3.94842
ENSMUSG00000004264	Phb2	9.09017
ENSMUSG00000004266	Ptpn6	3.14479
ENSMUSG00000004268	Emg1	6.97706
ENSMUSG00000004270	Lpcat3	2.17177
ENSMUSG00000004285	Atp6v1f	12.7552
ENSMUSG00000004317	Clcn5	3.92779
ENSMUSG00000004319	Clcn3	5.03793
ENSMUSG00000004356	Utp20	3.93555
ENSMUSG00000004359	Spic	1.87586
ENSMUSG00000004364	Cul3	2.3257
ENSMUSG00000004383	Large	1.69108
ENSMUSG00000004393	Ddx56	2.63888
ENSMUSG00000004394	Tmed4	43.8114
ENSMUSG00000004446	Bid	2.47659
ENSMUSG00000004451	Ralb	2.92821
ENSMUSG00000004455	Ppp1cc	4.62159
ENSMUSG00000004460	Dnajb11	18.3305
ENSMUSG00000004462	Tbccd1	2.1755
ENSMUSG00000004473	Clec11a	26.6999
ENSMUSG00000004500	Zfp324	3.16686
ENSMUSG00000004508	Gab2	1.5658
ENSMUSG00000004530	Coro1c	2.6063
ENSMUSG00000004535	Tax1bp1	2.31976
ENSMUSG00000004558	Ndrg2	13.9201
ENSMUSG00000004561	Mettl17	2.67406
ENSMUSG00000004562	Arhgef40	4.20062
ENSMUSG00000004565	Pnpla6	3.17797
ENSMUSG00000004568	Arhgef18	1.92827
ENSMUSG00000004591	Pkn2	2.54321
ENSMUSG00000004610	Etfb	7.55343
ENSMUSG00000004612	Nkg7	6.84925
ENSMUSG00000004626	Stxbp2	6.01305
ENSMUSG00000004633	Chn2	6.90647
ENSMUSG00000004637	Wwox	17.2745
ENSMUSG00000004642	Slbp	11.0374
ENSMUSG00000004655	Aqp1	16.3763
ENSMUSG00000004661	Arid3b	2.91892
ENSMUSG00000004665	Cnn2	7.78767
ENSMUSG00000004667	Polr2e	6.05371
ENSMUSG00000004677	Myo9b	2.86062
ENSMUSG00000004698	Hdac9	1.48406
ENSMUSG00000004707	Ly9	4.21799
ENSMUSG00000004730	Adgre1	4.17566
ENSMUSG00000004748	Mtfp1	3.93715
ENSMUSG00000004768	Rab23	3.89099
ENSMUSG00000004771	Rab11a	5.33927
ENSMUSG00000004788	Eif2b2	4.4809
ENSMUSG00000004789	Dlst	7.81887
ENSMUSG00000004798	Ulk2	7.64215
ENSMUSG00000004814	Ccl24	4.08284
ENSMUSG00000004815	Dgkq	2.61595
ENSMUSG00000004837	Grap	2.57451
ENSMUSG00000004843	Chmp2b	5.44728
ENSMUSG00000004846	Plod3	16.474
ENSMUSG00000004849	Ap1s1	38.5834
ENSMUSG00000004865	Srpk1	3.18557
ENSMUSG00000004880	Lbr	4.27493
ENSMUSG00000004891	Nes	4.77466
ENSMUSG00000004895	Prcc	3.30876
ENSMUSG00000004896	Rrnad1	6.90621
ENSMUSG00000004897	Hdgf	4.77565
ENSMUSG00000004929	Thop1	5.03561
ENSMUSG00000004931	Apba3	4.58609
ENSMUSG00000004934	Pias4	5.42687
ENSMUSG00000004936	Map2k1	4.05157
ENSMUSG00000004937	Sgta	3.78618
ENSMUSG00000004947	Dtx2	3.78469
ENSMUSG00000004951	Hspb1	21.8352
ENSMUSG00000004952	Rasa4	4.22224
ENSMUSG00000004980	Hnrnpa2b1	16.5154
ENSMUSG00000004994	Ccdc130	7.61306
ENSMUSG00000004996	Mri1	7.36154
ENSMUSG00000005034	Prkacb	5.66824
ENSMUSG00000005043	Sgsh	2.14394
ENSMUSG00000005057	Sh2b2	4.08116
ENSMUSG00000005069	Pex5	5.31045
ENSMUSG00000005078	Jkamp	6.39291
ENSMUSG00000005087	Cd44	5.2143
ENSMUSG00000005089	Slc1a2	8.59331
ENSMUSG00000005102	Eif2ak4	3.69653
ENSMUSG00000005103	Wdr1	8.74936
ENSMUSG00000005125	Ndrg1	2.44908
ENSMUSG00000005142	Man2b1	17.2259
ENSMUSG00000005150	Wdr83	9.51662
ENSMUSG00000005161	Prdx2	21.706
ENSMUSG00000005204	Senp3	10.4322
ENSMUSG00000005225	Plekha8	5.8432
ENSMUSG00000005233	Spc25	16.0166
ENSMUSG00000005251	Ripk4	9.60094
ENSMUSG00000005262	Ufd1l	6.30896
ENSMUSG00000005268	Prlr	13.9602
ENSMUSG00000005299	Letm1	11.7799
ENSMUSG00000005312	Ubqln1	4.73194
ENSMUSG00000005320	Fgfr4	6.16415
ENSMUSG00000005354	Txn2	12.3403
ENSMUSG00000005362	Crbn	4.05656
ENSMUSG00000005370	Msh6	2.43563
ENSMUSG00000005371	Fbxo11	2.42515
ENSMUSG00000005373	Mlxipl	2.83169
ENSMUSG00000005374	Tbl2	4.89462
ENSMUSG00000005378	Wbscr22	5.15418
ENSMUSG00000005410	Mcm5	2.96076
ENSMUSG00000005413	Hmox1	2.42947
ENSMUSG00000005417	Mprip	8.21101
ENSMUSG00000005442	Cic	5.23641
ENSMUSG00000005447	Pafah1b3	7.12503
ENSMUSG00000005465	Il27ra	35.2243
ENSMUSG00000005469	Prkaca	5.0304
ENSMUSG00000005470	Asf1b	3.44581
ENSMUSG00000005481	Ddx39	5.00999
ENSMUSG00000005483	Dnajb1	5.01017
ENSMUSG00000005493	Msh4	1.13702
ENSMUSG00000005501	Usp40	2.26188
ENSMUSG00000005505	Kbtbd4	5.0131
ENSMUSG00000005506	Celf1	2.68769
ENSMUSG00000005510	Ndufs3	12.1208
ENSMUSG00000005514	Por	6.11093
ENSMUSG00000005533	Igf1r	4.71884
ENSMUSG00000005534	Insr	3.1508
ENSMUSG00000005566	Trim28	6.22463
ENSMUSG00000005575	Ube2m	33.6569
ENSMUSG00000005580	Adcy9	2.0937
ENSMUSG00000005583	Mef2c	3.11341
ENSMUSG00000005609	Ctr9	3.3974
ENSMUSG00000005610	Eif4g2	20.0578
ENSMUSG00000005611	Mrvi1	2.86066
ENSMUSG00000005615	Pcyt1a	3.17334
ENSMUSG00000005621	Zfp592	2.36402
ENSMUSG00000005625	Psmd4	4.97034
ENSMUSG00000005656	Snx6	2.85509
ENSMUSG00000005672	Kit	2.53186
ENSMUSG00000005674	Tomm40l	3.53861
ENSMUSG00000005677	Nr1i3	3.39628
ENSMUSG00000005681	Apoa2	12.7182
ENSMUSG00000005682	Pan2	4.71966
ENSMUSG00000005683	Cs	5.02868
ENSMUSG00000005686	Ampd3	3.06397
ENSMUSG00000005687	Bcas2	9.75466
ENSMUSG00000005698	Ctcf	3.00768
ENSMUSG00000005699	Pard6a	2.61089
ENSMUSG00000005718	Tfap4	2.57241
ENSMUSG00000005732	Ranbp1	9.56422
ENSMUSG00000005763	Cd247	3.16234
ENSMUSG00000005774	Rfx5	3.11705
ENSMUSG00000005779	Psmb4	5.9575
ENSMUSG00000005802	Slc30a4	3.8249
ENSMUSG00000005803	Sqrdl	9.77086
ENSMUSG00000005804	Bloc1s6	4.50602
ENSMUSG00000005813	Metap1	3.88766
ENSMUSG00000005823	Gpr108	11.4638
ENSMUSG00000005836	Gata6	2.86983
ENSMUSG00000005846	Rsl1d1	3.94218
ENSMUSG00000005871	Apc	2.55077
ENSMUSG00000005873	Reep5	18.4153
ENSMUSG00000005881	Ergic3	43.3017
ENSMUSG00000005882	Uqcc1	6.97551
ENSMUSG00000005886	Ncoa2	1.40152
ENSMUSG00000005893	Nr2c2	2.88595
ENSMUSG00000005897	Nr2c1	3.02976
ENSMUSG00000005899	Smpd4	2.95155
ENSMUSG00000005907	Pex1	2.7026
ENSMUSG00000005936	Kctd20	4.11007
ENSMUSG00000005949	Ctns	9.03511
ENSMUSG00000005951	Shpk	7.53845
ENSMUSG00000005968	Tuft1	4.02859
ENSMUSG00000005973	Rcn1	21.8288
ENSMUSG00000005980	Dnase1	10.3659
ENSMUSG00000005982	Naa60	5.77583
ENSMUSG00000006005	Tpr	1.80784
ENSMUSG00000006010	BC003331	12.0934
ENSMUSG00000006014	Prg4	14.953
ENSMUSG00000006019	Dhx34	3.10682
ENSMUSG00000006021	Kptn	5.40451
ENSMUSG00000006024	Napa	7.66241
ENSMUSG00000006050	Sra1	9.88554
ENSMUSG00000006057	Atp5g1	9.18199
ENSMUSG00000006058	Snf8	14.537
ENSMUSG00000006095	Tbcb	4.89321
ENSMUSG00000006127	Inpp5k	3.21585
ENSMUSG00000006134	Crkl	3.87751
ENSMUSG00000006154	Eps8l1	4.17969
ENSMUSG00000006169	Clint1	2.20464
ENSMUSG00000006191	Cdkal1	1.08174
ENSMUSG00000006215	Zbtb17	2.96587
ENSMUSG00000006218	Fam131c	2.81417
ENSMUSG00000006219	Fblim1	4.7055
ENSMUSG00000006235	Epor	3.7326
ENSMUSG00000006241	Ccdc159	4.42581
ENSMUSG00000006262	Mob1b	4.61855
ENSMUSG00000006273	Atp6v1b2	4.18
ENSMUSG00000006276	Eps15l1	2.42435
ENSMUSG00000006281	Tep1	7.20608
ENSMUSG00000006288	Ttc5	4.00153
ENSMUSG00000006289	Osgep	17.0329
ENSMUSG00000006299	Aamp	6.42264
ENSMUSG00000006301	Tmbim1	8.28374
ENSMUSG00000006304	Arpc2	8.89845
ENSMUSG00000006307	Kmt2b	5.32308
ENSMUSG00000006310	Zbtb32	6.75392
ENSMUSG00000006315	Tmem147	4.55879
ENSMUSG00000006333	Rps9	40.9437
ENSMUSG00000006335	Tfpt	2.42309
ENSMUSG00000006344	Ggt5	7.76306
ENSMUSG00000006356	Crip2	3.37093
ENSMUSG00000006360	Crip1	5.21044
ENSMUSG00000006362	Cbfa2t3	1.62573
ENSMUSG00000006378	Gcat	13.5029
ENSMUSG00000006386	Tek	2.74276
ENSMUSG00000006390	Elovl1	2.85843
ENSMUSG00000006392	Med8	2.34025
ENSMUSG00000006412	Pfdn2	8.6839
ENSMUSG00000006418	Rnf114	4.45513
ENSMUSG00000006423	C330007P06Rik	11.1752
ENSMUSG00000006442	Srm	4.35828
ENSMUSG00000006445	Epha2	10.8494
ENSMUSG00000006456	Rbm14	4.03796
ENSMUSG00000006463	Zdhhc24	9.52788
ENSMUSG00000006464	Bbs1	4.67253
ENSMUSG00000006471	Ndor1	6.16907
ENSMUSG00000006476	Nsmf	6.24993
ENSMUSG00000006494	Pdk1	31.9274
ENSMUSG00000006498	Ptbp1	5.25007
ENSMUSG00000006517	Mvd	1.89392
ENSMUSG00000006519	Cyba	5.95088
ENSMUSG00000006522	Itih3	14.9974
ENSMUSG00000006526	Tmem110	4.56017
ENSMUSG00000006527	Sfmbt1	2.31075
ENSMUSG00000006529	Itih1	46.8778
ENSMUSG00000006567	Atp7b	5.44027
ENSMUSG00000006575	Rundc3a	15.0294
ENSMUSG00000006585	Cdt1	4.1823
ENSMUSG00000006587	Snai3	4.18654
ENSMUSG00000006589	Aprt	11.2045
ENSMUSG00000006599	Gtf2h1	5.82477
ENSMUSG00000006611	Hfe	12.1336
ENSMUSG00000006641	Slc5a6	5.79089
ENSMUSG00000006673	Qrich1	3.31708
ENSMUSG00000006676	Usp19	6.9423
ENSMUSG00000006678	Pola1	4.45762
ENSMUSG00000006699	Cdc42	7.08446
ENSMUSG00000006705	Pknox1	3.06789
ENSMUSG00000006711	D130043K22Rik	3.51544
ENSMUSG00000006715	Gmnn	2.2592
ENSMUSG00000006717	Acot13	6.04469
ENSMUSG00000006728	Cdk4	3.74296
ENSMUSG00000006731	B4galnt1	4.22025
ENSMUSG00000006732	Mettl1	3.69458
ENSMUSG00000006736	Tspan31	23.8189
ENSMUSG00000006740	Kif5b	2.98448
ENSMUSG00000006763	Saal1	6.8304
ENSMUSG00000006777	Krt23	7.56226
ENSMUSG00000006782	Cnp	6.45568
ENSMUSG00000006800	Sulf2	15.6798
ENSMUSG00000006818	Sod2	21.6755
ENSMUSG00000006850	Tmco6	6.72074
ENSMUSG00000006906	Stambp	3.04723
ENSMUSG00000006920	Ezh1	2.67359
ENSMUSG00000006930	Hap1	3.54891
ENSMUSG00000006931	P3h4	12.8923
ENSMUSG00000006932	Ctnnb1	3.34375
ENSMUSG00000006941	Eif1b	6.50373
ENSMUSG00000006958	Chrd	10.3035
ENSMUSG00000006998	Psmd2	7.52259
ENSMUSG00000007029	Vars	6.90614
ENSMUSG00000007036	Abhd16a	20.2018
ENSMUSG00000007038	Neu1	10.0813
ENSMUSG00000007039	Ddah2	3.57125
ENSMUSG00000007041	Clic1	5.16824
ENSMUSG00000007050	Lsm2	3.70976
ENSMUSG00000007216	Zfp775	18.6586
ENSMUSG00000007338	Mrpl49	8.70655
ENSMUSG00000007411	Mark3	2.87344
ENSMUSG00000007458	M6pr	11.2832
ENSMUSG00000007476	Lrrc8a	2.75857
ENSMUSG00000007564	Ppp2r1a	3.90387
ENSMUSG00000007570	Fance	5.68963
ENSMUSG00000007589	Tinf2	3.2662
ENSMUSG00000007594	Hapln4	8.78174
ENSMUSG00000007603	Dus3l	5.08543
ENSMUSG00000007610	Gtpbp3	4.87813
ENSMUSG00000007613	Tgfbr1	2.91391
ENSMUSG00000007617	Homer1	3.13533
ENSMUSG00000007655	Cav1	3.72002
ENSMUSG00000007656	Arpp19	6.92312
ENSMUSG00000007659	Bcl2l1	2.53526
ENSMUSG00000007670	Khsrp	5.212
ENSMUSG00000007721	Ccdc124	27.2761
ENSMUSG00000007739	Cct4	8.31389
ENSMUSG00000007777	0610009B22Rik	4.11224
ENSMUSG00000007812	Zfp655	3.06284
ENSMUSG00000007815	Rhoa	6.20478
ENSMUSG00000007817	Zmiz1	0.752966
ENSMUSG00000007827	Ankrd26	1.83834
ENSMUSG00000007833	Aldh16a1	6.13221
ENSMUSG00000007837	Prrg2	5.45145
ENSMUSG00000007850	Hnrnph1	6.58739
ENSMUSG00000007867	Ift43	4.09539
ENSMUSG00000007872	Id3	3.83927
ENSMUSG00000007880	Arid1a	2.79518
ENSMUSG00000007891	Ctsd	36.4166
ENSMUSG00000007892	Rplp1	18.9445
ENSMUSG00000007950	Abhd8	7.21626
ENSMUSG00000007987	Ift22	7.67936
ENSMUSG00000008035	Mid1ip1	2.72226
ENSMUSG00000008036	Ap2s1	7.44502
ENSMUSG00000008140	Emc10	23.5347
ENSMUSG00000008153	Clstn3	2.19964
ENSMUSG00000008167	Fbxw9	5.78452
ENSMUSG00000008200	Fnbp4	7.28589
ENSMUSG00000008206	Cers4	3.81961
ENSMUSG00000008226	Scrn3	6.90447
ENSMUSG00000008301	Phax	4.44569
ENSMUSG00000008305	Tle1	3.32793
ENSMUSG00000008307	1700109H08Rik	7.46705
ENSMUSG00000008333	Snrpb2	7.3739
ENSMUSG00000008348	Ubc	2.82444
ENSMUSG00000008373	Prpf31	2.48071
ENSMUSG00000008393	Carhsp1	7.10229
ENSMUSG00000008398	Elk3	1.95727
ENSMUSG00000008429	Herpud2	3.88095
ENSMUSG00000008435	Rdh13	4.25862
ENSMUSG00000008450	Nutf2	8.05528
ENSMUSG00000008475	Arpc5	43.6694
ENSMUSG00000008496	Pou2f2	2.85323
ENSMUSG00000008540	Mgst1	13.9381
ENSMUSG00000008575	Nfib	2.79246
ENSMUSG00000008604	Ubqln4	3.80952
ENSMUSG00000008668	Rps18	4.91992
ENSMUSG00000008683	Rps15a	9.81485
ENSMUSG00000008690	Ncaph2	5.34754
ENSMUSG00000008730	Hipk1	3.98409
ENSMUSG00000008763	Man1a2	3.99654
ENSMUSG00000008822	Acyp1	5.12364
ENSMUSG00000008845	Cd163	2.96942
ENSMUSG00000008855	Hdac5	3.57115
ENSMUSG00000008859	Rala	7.65904
ENSMUSG00000008892	Vdac3	4.31789
ENSMUSG00000008958	Vps72	4.57593
ENSMUSG00000008976	Gabpa	3.65559
ENSMUSG00000008999	Bmp7	6.29887
ENSMUSG00000009013	Dynll1	23.5551
ENSMUSG00000009030	Pdcl	3.05321
ENSMUSG00000009035	Tmem184b	4.4746
ENSMUSG00000009073	Nf2	3.25001
ENSMUSG00000009075	Cabp7	4.07597
ENSMUSG00000009076	Zmat5	4.43649
ENSMUSG00000009079	Ewsr1	4.27629
ENSMUSG00000009090	Ap1b1	2.89747
ENSMUSG00000009112	Bcl2l13	3.16749
ENSMUSG00000009145	Dqx1	13.0942
ENSMUSG00000009207	Lnp	5.7673
ENSMUSG00000009291	Pttg1ip	10.7487
ENSMUSG00000009292	Trpm2	2.752
ENSMUSG00000009293	Ube2g2	4.52283
ENSMUSG00000009376	Met	3.87645
ENSMUSG00000009378	Slc16a12	5.66195
ENSMUSG00000009406	Elk1	9.86238
ENSMUSG00000009418	Nav1	1.62579
ENSMUSG00000009470	Tnpo1	9.65359
ENSMUSG00000009535	Rnmt	4.93548
ENSMUSG00000009545	Kcnq1	2.54338
ENSMUSG00000009555	Cdk9	5.44875
ENSMUSG00000009563	Tor2a	9.55933
ENSMUSG00000009566	Fpgs	2.55103
ENSMUSG00000009569	Mkl2	1.56527
ENSMUSG00000009575	Cbx5	3.48425
ENSMUSG00000009585	Apobec3	6.48797
ENSMUSG00000009614	Sardh	20.6754
ENSMUSG00000009621	Vav2	2.04783
ENSMUSG00000009630	Ppp2cb	4.78538
ENSMUSG00000009633	G0s2	0.685229
ENSMUSG00000009640	Dmap1	2.35787
ENSMUSG00000009646	Pla2g12b	6.21335
ENSMUSG00000009647	Mcu	2.60055
ENSMUSG00000009654	Oit3	5.1648
ENSMUSG00000009681	Bcr	2.10873
ENSMUSG00000009687	Fxyd5	18.5183
ENSMUSG00000009733	Tfcp2	2.83775
ENSMUSG00000009739	Pou6f1	7.55113
ENSMUSG00000009741	Ubp1	6.85834
ENSMUSG00000009772	Nuak2	3.37791
ENSMUSG00000009828	Ick	2.56982
ENSMUSG00000009863	Sdhb	13.383
ENSMUSG00000009894	Snap47	3.35378
ENSMUSG00000009905	Kdsr	21.453
ENSMUSG00000009907	Vps4b	4.5629
ENSMUSG00000009927	Rps25	19.3582
ENSMUSG00000009995	Taz	4.69579
ENSMUSG00000010025	Aldh3a2	10.1076
ENSMUSG00000010045	Tmem115	4.54626
ENSMUSG00000010047	Hyal2	3.60949
ENSMUSG00000010048	Ifrd2	6.67056
ENSMUSG00000010051	Hyal1	4.32766
ENSMUSG00000010054	Tusc2	8.72922
ENSMUSG00000010057	Nprl2	3.87525
ENSMUSG00000010064	Slc38a3	17.1507
ENSMUSG00000010095	Slc3a2	4.70722
ENSMUSG00000010097	Nxf1	7.85766
ENSMUSG00000010110	Stx5a	3.56631
ENSMUSG00000010122	Slc47a1	15.1837
ENSMUSG00000010175	Prox1	2.37796
ENSMUSG00000010205	Raver1	4.05321
ENSMUSG00000010277	2610507B11Rik	7.77156
ENSMUSG00000010290	AI597479	4.77975
ENSMUSG00000010307	Tmem86a	3.15651
ENSMUSG00000010358	Ifi35	2.40981
ENSMUSG00000010362	Rdm1	17.2901
ENSMUSG00000010392	Gosr1	3.17617
ENSMUSG00000010406	Mrpl52	8.8617
ENSMUSG00000010453	Kansl3	3.83466
ENSMUSG00000010517	Faf1	2.08022
ENSMUSG00000010538	Tsacc	3.87452
ENSMUSG00000010554	Mettl16	3.01215
ENSMUSG00000010601	Apol7a	3.81019
ENSMUSG00000010607	Pigyl	4.02051
ENSMUSG00000010608	Rbm25	2.97558
ENSMUSG00000010609	Psen2	2.25994
ENSMUSG00000010651	Acaa1b	11.423
ENSMUSG00000010663	Fads1	19.8484
ENSMUSG00000010721	Lmbr1	3.03263
ENSMUSG00000010751	Tnfrsf22	2.41851
ENSMUSG00000010755	Cars	2.08869
ENSMUSG00000010797	Wnt2	1.89338
ENSMUSG00000010911	Apip	4.33992
ENSMUSG00000010914	Pdhx	5.5273
ENSMUSG00000010936	Vac14	2.28905
ENSMUSG00000011096	Akt1s1	5.48465
ENSMUSG00000011114	Tbrg1	4.15461
ENSMUSG00000011148	Adssl1	34.0885
ENSMUSG00000011158	Brf1	3.99446
ENSMUSG00000011179	Odc1	10.4682
ENSMUSG00000011254	Thg1l	1.96859
ENSMUSG00000011263	Exoc3l2	1.70935
ENSMUSG00000011267	Zfp296	26.683
ENSMUSG00000011305	Plin5	1.68391
ENSMUSG00000011306	Sugp1	3.77547
ENSMUSG00000011382	Dhdh	17.3932
ENSMUSG00000011427	Zfp790	2.3446
ENSMUSG00000011658	Fuz	6.45059
ENSMUSG00000011752	Pgam1	37.216
ENSMUSG00000011831	Evi5	3.26274
ENSMUSG00000011832	Evi5l	3.49532
ENSMUSG00000011837	Snapc2	2.32254
ENSMUSG00000011877	Git1	2.95504
ENSMUSG00000011884	Gltp	5.67927
ENSMUSG00000011958	Bnip2	5.3577
ENSMUSG00000011960	Ccnt1	11.3879
ENSMUSG00000012076	Brms1l	2.26564
ENSMUSG00000012114	Med15	2.62116
ENSMUSG00000012117	Dhdds	4.23358
ENSMUSG00000012296	Tjap1	7.05208
ENSMUSG00000012422	Tmem167	6.47798
ENSMUSG00000012428	Steap4	11.114
ENSMUSG00000012429	Mplkip	2.18515
ENSMUSG00000012443	Kif11	4.36531
ENSMUSG00000012483	Rpa3	27.3957
ENSMUSG00000012519	Mlkl	3.32779
ENSMUSG00000012535	Tnpo3	2.30148
ENSMUSG00000012609	Ttll5	3.83245
ENSMUSG00000012640	Zfp715	3.49187
ENSMUSG00000012848	Rps5	48.5982
ENSMUSG00000013033	Adgrl1	3.46601
ENSMUSG00000013076	Amotl1	3.91684
ENSMUSG00000013089	Etv5	3.01801
ENSMUSG00000013150	Gfod2	2.13629
ENSMUSG00000013160	Atp6v0d1	5.31227
ENSMUSG00000013275	Slc41a1	18.2637
ENSMUSG00000013465	Nelfb	4.8069
ENSMUSG00000013495	Tmem175	3.10887
ENSMUSG00000013539	Tango2	2.8393
ENSMUSG00000013622	Atraid	15.8545
ENSMUSG00000013629	Cad	6.88586
ENSMUSG00000013646	Sh3bp5l	2.35091
ENSMUSG00000013662	Atad1	10.5335
ENSMUSG00000013663	Pten	4.79691
ENSMUSG00000013698	Pea15a	8.68091
ENSMUSG00000013701	Timm23	9.86099
ENSMUSG00000013707	Tnfaip8l2	2.67745
ENSMUSG00000013736	Trnt1	3.46525
ENSMUSG00000013787	Ehmt2	8.62092
ENSMUSG00000013822	Elof1	6.71842
ENSMUSG00000013833	Med16	8.36564
ENSMUSG00000013846	St3gal1	2.05726
ENSMUSG00000013858	Tmem259	17.5368
ENSMUSG00000013878	Rnf170	7.535
ENSMUSG00000013973	Dedd	6.36059
ENSMUSG00000013997	Nit1	5.89417
ENSMUSG00000014039	Prdm15	2.53528
ENSMUSG00000014074	Rnf168	1.94828
ENSMUSG00000014075	Tctex1d2	8.67276
ENSMUSG00000014077	Chp1	10.6659
ENSMUSG00000014158	Trpv4	2.78504
ENSMUSG00000014164	Klhl3	2.01685
ENSMUSG00000014177	Tvp23b	35.223
ENSMUSG00000014195	Dnajc7	3.84682
ENSMUSG00000014226	Cacybp	4.30741
ENSMUSG00000014232	Cluap1	4.80088
ENSMUSG00000014243	Zswim7	8.17203
ENSMUSG00000014245	Pigl	9.06115
ENSMUSG00000014294	Ndufa2	7.75234
ENSMUSG00000014301	Pam16	3.04632
ENSMUSG00000014303	Glis2	13.5466
ENSMUSG00000014313	Cox6c	46.6341
ENSMUSG00000014329	Bicc1	10.7985
ENSMUSG00000014349	Ube2z	4.07308
ENSMUSG00000014353	Tmem87b	3.12418
ENSMUSG00000014355	Anapc1	2.83484
ENSMUSG00000014361	Mertk	1.7353
ENSMUSG00000014402	Tsg101	8.04647
ENSMUSG00000014418	Hps5	5.13245
ENSMUSG00000014426	Map3k4	2.1605
ENSMUSG00000014444	Piezo1	4.66659
ENSMUSG00000014470	Rnf166	8.5639
ENSMUSG00000014496	Ankrd28	2.84402
ENSMUSG00000014498	Ankrd52	3.36941
ENSMUSG00000014503	Pkd2l2	3.68195
ENSMUSG00000014504	Srp19	3.67538
ENSMUSG00000014542	Clec4f	3.98229
ENSMUSG00000014547	Wdfy2	1.44308
ENSMUSG00000014550	Rbsn	3.0732
ENSMUSG00000014551	Mrps25	4.3584
ENSMUSG00000014554	Dguok	3.6678
ENSMUSG00000014599	Csf1	4.16432
ENSMUSG00000014601	Strip1	2.98711
ENSMUSG00000014606	Slc25a11	10.6354
ENSMUSG00000014633	Cmc2	5.73427
ENSMUSG00000014668	Chfr	4.99368
ENSMUSG00000014748	Tex261	12.1064
ENSMUSG00000014763	Fam120b	1.67795
ENSMUSG00000014767	Tbp	4.66999
ENSMUSG00000014769	Psmb1	6.92735
ENSMUSG00000014771	Pdcd2	3.96791
ENSMUSG00000014773	Dll1	5.29306
ENSMUSG00000014776	Nol3	7.31794
ENSMUSG00000014778	Fhod1	2.68687
ENSMUSG00000014791	Elmo3	5.94533
ENSMUSG00000014837	4931428F04Rik	2.76118
ENSMUSG00000014850	Msh3	2.3822
ENSMUSG00000014852	Adamts13	33.3847
ENSMUSG00000014856	Tmem208	16.2545
ENSMUSG00000014859	E2f4	3.73269
ENSMUSG00000014867	Surf4	14.6711
ENSMUSG00000014873	Surf2	6.22529
ENSMUSG00000014907	Naf1	4.46533
ENSMUSG00000014932	Yes1	2.86221
ENSMUSG00000014956	Ppp1cb	9.78142
ENSMUSG00000014959	Gorasp2	3.20706
ENSMUSG00000014980	Tsen15	2.96313
ENSMUSG00000015002	Efr3a	4.2261
ENSMUSG00000015013	Trappc2l	10.5359
ENSMUSG00000015016	Acsf3	14.1992
ENSMUSG00000015023	Ddx19a	8.75669
ENSMUSG00000015027	Galns	31.6566
ENSMUSG00000015053	Gata2	6.65589
ENSMUSG00000015083	C8g	40.1349
ENSMUSG00000015087	Rabl6	3.41443
ENSMUSG00000015092	Edf1	13.4872
ENSMUSG00000015093	Clic3	1.5596
ENSMUSG00000015094	Npdc1	29.6149
ENSMUSG00000015095	Fbxw5	8.62333
ENSMUSG00000015112	Slc25a13	9.04836
ENSMUSG00000015120	Ube2i	5.08488
ENSMUSG00000015126	Tsr3	5.68206
ENSMUSG00000015127	Unkl	4.14777
ENSMUSG00000015133	Lrrk1	2.75352
ENSMUSG00000015143	Actn1	3.52378
ENSMUSG00000015149	Sirt2	11.9692
ENSMUSG00000015165	Hnrnpl	2.573
ENSMUSG00000015176	Nolc1	8.17865
ENSMUSG00000015189	Casd1	5.09287
ENSMUSG00000015202	Cnksr3	1.9536
ENSMUSG00000015214	Mtmr1	8.17442
ENSMUSG00000015217	Hmgb3	9.91608
ENSMUSG00000015224	Cyp2j9	2.1169
ENSMUSG00000015243	Abca1	1.91896
ENSMUSG00000015289	Lage3	15.3484
ENSMUSG00000015290	Ubl4a	6.50915
ENSMUSG00000015291	Gdi1	12.8446
ENSMUSG00000015305	Sash1	1.25646
ENSMUSG00000015335	Zdhhc12	4.88821
ENSMUSG00000015337	Endog	8.44649
ENSMUSG00000015340	Cybb	6.75151
ENSMUSG00000015341	Golga7	12.4811
ENSMUSG00000015342	Xk	3.49366
ENSMUSG00000015354	Pcolce2	7.69092
ENSMUSG00000015355	Cd48	2.78846
ENSMUSG00000015357	Clpx	1.42147
ENSMUSG00000015363	Trabd	5.38391
ENSMUSG00000015377	Dennd6b	5.38116
ENSMUSG00000015437	Gzmb	15.3066
ENSMUSG00000015461	Atf6b	5.69641
ENSMUSG00000015467	Egfl8	9.51964
ENSMUSG00000015468	Notch4	3.45812
ENSMUSG00000015474	Ppt2	4.57849
ENSMUSG00000015488	Cacfd1	5.81778
ENSMUSG00000015501	Hivep2	1.79818
ENSMUSG00000015522	Arnt	2.1289
ENSMUSG00000015536	Mocs2	5.58929
ENSMUSG00000015542	Nat9	4.70591
ENSMUSG00000015597	Zfp318	2.12244
ENSMUSG00000015647	Lama5	27.5837
ENSMUSG00000015653	Steap2	5.09997
ENSMUSG00000015656	Hspa8	4.95831
ENSMUSG00000015659	Serac1	2.35981
ENSMUSG00000015668	Pdzd11	7.20964
ENSMUSG00000015671	Psma2	3.43786
ENSMUSG00000015672	Mrpl32	6.21169
ENSMUSG00000015697	Setdb1	3.26394
ENSMUSG00000015711	Prune	1.9295
ENSMUSG00000015714	Cers2	17.3877
ENSMUSG00000015733	Capza2	7.27821
ENSMUSG00000015745	Plekho1	2.62385
ENSMUSG00000015747	Vps45	3.73819
ENSMUSG00000015748	Prpf3	5.46909
ENSMUSG00000015749	Anp32e	4.8889
ENSMUSG00000015750	Aph1a	24.2812
ENSMUSG00000015755	Tab2	4.47086
ENSMUSG00000015757	Ppil4	2.53281
ENSMUSG00000015759	Cnih1	39.8933
ENSMUSG00000015776	Med22	4.89417
ENSMUSG00000015790	Surf1	11.1242
ENSMUSG00000015804	Med28	4.5472
ENSMUSG00000015806	Qdpr	7.98122
ENSMUSG00000015812	Gnrh1	3.28068
ENSMUSG00000015837	Sqstm1	2.22933
ENSMUSG00000015839	Nfe2l2	6.68822
ENSMUSG00000015843	Rxrg	1.53673
ENSMUSG00000015846	Rxra	2.16064
ENSMUSG00000015850	Adamtsl4	14.8018
ENSMUSG00000015854	Cd5l	5.50206
ENSMUSG00000015869	Prpsap1	4.3774
ENSMUSG00000015882	Lcorl	4.01873
ENSMUSG00000015889	Lta4h	2.88016
ENSMUSG00000015890	Amdhd1	8.22602
ENSMUSG00000015932	Dstn	18.0399
ENSMUSG00000015937	H2afy	16.2543
ENSMUSG00000015942	Gtf2ird2	3.07253
ENSMUSG00000015943	Bola1	3.91225
ENSMUSG00000015944	Gatsl2	3.11844
ENSMUSG00000015947	Fcgr1	2.52887
ENSMUSG00000015950	Ncf1	7.22598
ENSMUSG00000015961	Adss	4.07151
ENSMUSG00000015966	Il17rb	7.65547
ENSMUSG00000015970	Chdh	4.96496
ENSMUSG00000015971	Actr8	2.88535
ENSMUSG00000015994	Fnta	2.93543
ENSMUSG00000016018	Skiv2l2	1.60821
ENSMUSG00000016024	Lbp	11.4795
ENSMUSG00000016028	Celsr1	2.0102
ENSMUSG00000016087	Fli1	1.96481
ENSMUSG00000016128	Stard13	1.05866
ENSMUSG00000016181	Diexf	3.11828
ENSMUSG00000016206	H2-M3	4.516
ENSMUSG00000016239	Lonrf3	5.15738
ENSMUSG00000016252	Atp5e	22.7129
ENSMUSG00000016253	Nelfcd	4.06632
ENSMUSG00000016256	Ctsz	20.0656
ENSMUSG00000016257	Slmo2	5.38785
ENSMUSG00000016308	Ube2a	9.82682
ENSMUSG00000016319	Slc25a5	9.34649
ENSMUSG00000016344	Ppdpf	7.25446
ENSMUSG00000016356	Col20a1	5.9821
ENSMUSG00000016382	Pls3	7.98126
ENSMUSG00000016409	Nkap	2.97484
ENSMUSG00000016427	Ndufa1	10.6591
ENSMUSG00000016477	E2f3	1.77284
ENSMUSG00000016481	Cr1l	10.9519
ENSMUSG00000016487	Ppfibp1	3.04173
ENSMUSG00000016493	Cd46	4.87796
ENSMUSG00000016494	Cd34	3.93467
ENSMUSG00000016495	Plgrkt	3.64925
ENSMUSG00000016496	Cd274	6.21399
ENSMUSG00000016503	Gtf3a	12.187
ENSMUSG00000016510	Mtif3	3.85431
ENSMUSG00000016520	Lnx2	2.48722
ENSMUSG00000016528	Mapkapk2	4.08819
ENSMUSG00000016541	Atxn10	5.63779
ENSMUSG00000016554	Eif3d	5.10048
ENSMUSG00000016559	H3f3b	8.58832
ENSMUSG00000016619	Nup50	4.49462
ENSMUSG00000016637	Ift27	7.73129
ENSMUSG00000016664	Pacsin2	2.07534
ENSMUSG00000016756	Cmah	17.4032
ENSMUSG00000016757	Ttll12	4.32806
ENSMUSG00000016758	Bik	2.65201
ENSMUSG00000016831	Tox4	4.30987
ENSMUSG00000016833	Mrps18c	5.93007
ENSMUSG00000016921	Srsf6	8.21366
ENSMUSG00000016933	Plcg1	4.40098
ENSMUSG00000016940	Kctd2	9.79977
ENSMUSG00000016946	Kctd5	5.36687
ENSMUSG00000016984	Etaa1	2.30499
ENSMUSG00000017009	Sdc4	6.55288
ENSMUSG00000017057	Il13ra1	14.3175
ENSMUSG00000017119	Nbr1	2.79477
ENSMUSG00000017132	Cyth1	2.27564
ENSMUSG00000017144	Rnd3	27.941
ENSMUSG00000017146	Brca1	5.49586
ENSMUSG00000017167	Cntnap1	4.28526
ENSMUSG00000017176	Nt5c3b	7.18952
ENSMUSG00000017188	Coa3	4.1179
ENSMUSG00000017210	Med24	2.2399
ENSMUSG00000017221	Psmd3	4.19952
ENSMUSG00000017264	Exosc10	2.73404
ENSMUSG00000017286	Glod4	11.5288
ENSMUSG00000017288	Vps53	3.63781
ENSMUSG00000017291	Taok1	3.51346
ENSMUSG00000017299	Dnttip1	5.69209
ENSMUSG00000017307	Acot8	4.98328
ENSMUSG00000017309	Cd300lg	3.32029
ENSMUSG00000017376	Nlk	3.99189
ENSMUSG00000017386	Traf4	3.10139
ENSMUSG00000017390	Aldoc	8.87559
ENSMUSG00000017404	Rpl19	14.2059
ENSMUSG00000017418	Arl5b	3.5961
ENSMUSG00000017421	Zfp207	3.59104
ENSMUSG00000017428	Psmd11	2.34132
ENSMUSG00000017446	C1qtnf1	11.9692
ENSMUSG00000017453	Pipox	21.1491
ENSMUSG00000017478	Zc3h18	2.30295
ENSMUSG00000017485	Top2b	2.41097
ENSMUSG00000017491	Rarb	1.51538
ENSMUSG00000017548	Suz12	3.61728
ENSMUSG00000017550	Atad5	2.4274
ENSMUSG00000017561	Crlf3	4.37703
ENSMUSG00000017615	Tnfaip1	3.51491
ENSMUSG00000017631	Abr	3.10656
ENSMUSG00000017639	Rab11fip4	2.53383
ENSMUSG00000017652	Cd40	3.83496
ENSMUSG00000017664	Slc35c2	4.93675
ENSMUSG00000017667	Zfp334	5.33352
ENSMUSG00000017670	Elmo2	2.70498
ENSMUSG00000017677	Wsb1	7.76008
ENSMUSG00000017679	Ttpal	17.3241
ENSMUSG00000017686	Rhot1	1.88004
ENSMUSG00000017697	Ada	3.12633
ENSMUSG00000017707	Serinc3	8.13514
ENSMUSG00000017713	Tha1	14.5423
ENSMUSG00000017715	Pgs1	2.44908
ENSMUSG00000017716	Birc5	4.48856
ENSMUSG00000017718	Afmid	11.4845
ENSMUSG00000017721	Pigt	5.97302
ENSMUSG00000017723	Wfdc2	18.4293
ENSMUSG00000017747	Ghdc	9.9279
ENSMUSG00000017754	Pltp	10.9698
ENSMUSG00000017756	Slc12a7	3.46277
ENSMUSG00000017760	Ctsa	15.49
ENSMUSG00000017764	Zswim1	4.20691
ENSMUSG00000017774	Myo1c	4.30806
ENSMUSG00000017776	Crk	3.1295
ENSMUSG00000017778	Cox7c	43.9736
ENSMUSG00000017781	Pitpna	5.52754
ENSMUSG00000017801	Mlx	4.27414
ENSMUSG00000017802	Fam134c	3.95985
ENSMUSG00000017830	Dhx58	3.48381
ENSMUSG00000017831	Rab5a	6.23424
ENSMUSG00000017837	Nkiras2	5.1578
ENSMUSG00000017843	Ppp2r5c	5.38284
ENSMUSG00000017858	Ift52	15.0007
ENSMUSG00000017868	Sgk2	1.72427
ENSMUSG00000017929	B4galt5	1.87106
ENSMUSG00000017950	Hnf4a	4.67633
ENSMUSG00000017969	Ptgis	3.40038
ENSMUSG00000017978	Cadps2	9.13961
ENSMUSG00000017999	Ddx27	2.66213
ENSMUSG00000018001	Cyth3	2.06174
ENSMUSG00000018008	Cyth4	3.0428
ENSMUSG00000018012	Rac3	3.68435
ENSMUSG00000018040	Rrp7a	4.94371
ENSMUSG00000018042	Cyb5r3	13.2159
ENSMUSG00000018068	Ints2	2.87801
ENSMUSG00000018076	Med13l	1.64834
ENSMUSG00000018160	Med1	6.51113
ENSMUSG00000018166	Erbb3	3.8891
ENSMUSG00000018167	Stard3	3.7968
ENSMUSG00000018169	Mfng	4.00097
ENSMUSG00000018171	Vmp1	5.0748
ENSMUSG00000018189	Uchl5	5.2554
ENSMUSG00000018196	Glrx2	8.74844
ENSMUSG00000018199	Trove2	5.61908
ENSMUSG00000018209	Stk4	2.50482
ENSMUSG00000018217	Pmp22	2.3018
ENSMUSG00000018239	Zcchc10	11.227
ENSMUSG00000018286	Psmb6	6.24434
ENSMUSG00000018287	Spag7	4.4622
ENSMUSG00000018293	Pfn1	9.60544
ENSMUSG00000018322	Tomm34	4.04325
ENSMUSG00000018326	Ywhab	5.00382
ENSMUSG00000018334	Ksr1	0.742217
ENSMUSG00000018339	Gpx3	25.2256
ENSMUSG00000018340	Anxa6	7.03091
ENSMUSG00000018347	Zkscan6	1.8734
ENSMUSG00000018362	Kpna2	3.86906
ENSMUSG00000018363	Smurf2	2.36689
ENSMUSG00000018372	Cep95	4.56447
ENSMUSG00000018377	Vezf1	13.9866
ENSMUSG00000018378	Cuedc1	3.60725
ENSMUSG00000018379	Srsf1	3.38386
ENSMUSG00000018381	Abi3	2.98466
ENSMUSG00000018387	Shroom1	1.59221
ENSMUSG00000018395	Kif3a	2.20741
ENSMUSG00000018398	2017-09-08	4.40739
ENSMUSG00000018401	Mtmr4	1.93759
ENSMUSG00000018411	Mapt	5.44029
ENSMUSG00000018412	Kansl1	2.05249
ENSMUSG00000018415	Gid4	17.318
ENSMUSG00000018417	Myo1b	3.33722
ENSMUSG00000018425	Dhx40	4.51067
ENSMUSG00000018427	Ypel2	2.57019
ENSMUSG00000018428	Akap1	2.33574
ENSMUSG00000018433	Nol11	3.36292
ENSMUSG00000018442	Derl2	6.67916
ENSMUSG00000018446	C1qbp	35.6444
ENSMUSG00000018449	Rpain	2.02421
ENSMUSG00000018459	Slc13a3	46.7357
ENSMUSG00000018474	Chd3	7.43716
ENSMUSG00000018481	Appbp2	3.64906
ENSMUSG00000018486	Wnt9b	6.45924
ENSMUSG00000018501	Ncor1	2.2309
ENSMUSG00000018507	Trpv2	3.91809
ENSMUSG00000018509	Cenpv	2.97986
ENSMUSG00000018537	Pcgf2	4.03888
ENSMUSG00000018541	Cwc25	4.50338
ENSMUSG00000018547	Pip4k2b	2.83983
ENSMUSG00000018548	Trim37	6.01183
ENSMUSG00000018559	Ctdnep1	4.07228
ENSMUSG00000018565	Elp5	4.09909
ENSMUSG00000018566	Slc2a4	5.20104
ENSMUSG00000018567	Gabarap	18.076
ENSMUSG00000018572	Phf23	4.66375
ENSMUSG00000018583	G3bp1	4.03794
ENSMUSG00000018585	Atox1	7.19392
ENSMUSG00000018599	Mief2	3.41428
ENSMUSG00000018604	Tbx3	2.82064
ENSMUSG00000018648	Dusp14	3.24166
ENSMUSG00000018651	Tada2a	2.16942
ENSMUSG00000018654	Ikzf1	3.24547
ENSMUSG00000018659	Pnpo	9.95424
ENSMUSG00000018661	Cog1	3.08937
ENSMUSG00000018666	Cbx1	11.3795
ENSMUSG00000018669	Cdk5rap3	9.20679
ENSMUSG00000018672	Copz2	32.572
ENSMUSG00000018677	Slc25a39	11.6603
ENSMUSG00000018678	Sp2	4.19558
ENSMUSG00000018697	Aatf	2.07185
ENSMUSG00000018707	Dync1h1	4.74974
ENSMUSG00000018727	Cpsf4l	2.43371
ENSMUSG00000018733	Pex12	8.83177
ENSMUSG00000018736	Ndel1	3.62482
ENSMUSG00000018740	Slc25a35	4.24202
ENSMUSG00000018750	Zbtb4	1.95998
ENSMUSG00000018752	Tnfsfm13	26.8473
ENSMUSG00000018761	Mpdu1	8.7722
ENSMUSG00000018765	Fxr2	6.57671
ENSMUSG00000018770	Atp5g3	11.2856
ENSMUSG00000018774	Cd68	6.31331
ENSMUSG00000018796	Acsl1	3.25092
ENSMUSG00000018800	Abca5	14.9967
ENSMUSG00000018809	Smyd4	3.19013
ENSMUSG00000018820	Zfyve27	5.25037
ENSMUSG00000018821	Avpi1	4.15557
ENSMUSG00000018830	Myh11	4.00677
ENSMUSG00000018841	Rad51d	2.53935
ENSMUSG00000018845	Unc45b	4.77669
ENSMUSG00000018846	Pank3	4.79775
ENSMUSG00000018848	Rars	2.97449
ENSMUSG00000018849	Wwc1	1.75657
ENSMUSG00000018858	Ict1	13.0673
ENSMUSG00000018861	Fdxr	13.1994
ENSMUSG00000018882	Mrpl45	7.17426
ENSMUSG00000018900	Slc22a5	5.67873
ENSMUSG00000018906	P4ha2	2.95135
ENSMUSG00000018909	Arrb1	2.21721
ENSMUSG00000018920	Cxcl16	8.69996
ENSMUSG00000018921	Pelp1	2.16048
ENSMUSG00000018923	Med11	4.74006
ENSMUSG00000018927	Ccl6	4.84638
ENSMUSG00000018931	Natd1	3.78583
ENSMUSG00000018932	Map2k3	3.59298
ENSMUSG00000018965	Ywhah	7.45319
ENSMUSG00000018974	Sart3	2.87977
ENSMUSG00000018995	Nars2	7.01368
ENSMUSG00000018999	Slc35b4	2.02739
ENSMUSG00000019039	Dalrd3	10.3352
ENSMUSG00000019054	Fis1	22.7809
ENSMUSG00000019055	Plod1	9.37619
ENSMUSG00000019066	Rab3d	6.43923
ENSMUSG00000019082	Slc25a22	4.02916
ENSMUSG00000019087	Atp6ap1	12.778
ENSMUSG00000019088	Dnase1l1	6.03601
ENSMUSG00000019132	BC005537	3.8734
ENSMUSG00000019139	Isyna1	39.2558
ENSMUSG00000019143	Hars2	3.96974
ENSMUSG00000019179	Mdh2	10.2718
ENSMUSG00000019188	H13	11.1325
ENSMUSG00000019189	Rnf145	4.55935
ENSMUSG00000019194	Scn1b	6.87899
ENSMUSG00000019210	Atp6v1e1	16.4812
ENSMUSG00000019232	Etnppl	6.36399
ENSMUSG00000019254	Ppp1r12c	6.28167
ENSMUSG00000019256	Ahr	2.21432
ENSMUSG00000019261	Map1s	3.89673
ENSMUSG00000019278	Dpep1	9.93612
ENSMUSG00000019295	Tmem129	9.11995
ENSMUSG00000019297	Nop9	3.55439
ENSMUSG00000019302	Atp6v0a1	9.25334
ENSMUSG00000019312	Grb7	3.36287
ENSMUSG00000019338	Zfp687	3.03447
ENSMUSG00000019362	D8Ertd738e	23.0474
ENSMUSG00000019368	Sec14l4	4.01409
ENSMUSG00000019370	Calm3	9.95788
ENSMUSG00000019373	Cops3	3.22653
ENSMUSG00000019428	Fkbp8	14.8595
ENSMUSG00000019432	Ddx39b	6.198
ENSMUSG00000019433	Gipc1	3.9197
ENSMUSG00000019437	Tlcd1	9.6992
ENSMUSG00000019461	Plscr3	3.86132
ENSMUSG00000019464	Ptger1	4.4521
ENSMUSG00000019467	Arhgef25	2.85262
ENSMUSG00000019470	Xab2	3.97392
ENSMUSG00000019471	Cdc37	10.1237
ENSMUSG00000019478	Rab4a	5.9324
ENSMUSG00000019487	Trip10	8.14389
ENSMUSG00000019494	Cops6	17.3021
ENSMUSG00000019505	Ubb	32.8706
ENSMUSG00000019518	Ap4m1	6.72096
ENSMUSG00000019528	Gyg	18.8373
ENSMUSG00000019558	Slc6a8	17.9824
ENSMUSG00000019564	Arid3a	2.35266
ENSMUSG00000019578	Ubxn6	17.4278
ENSMUSG00000019579	Mydgf	6.91719
ENSMUSG00000019590	Cyb561	14.7574
ENSMUSG00000019647	Sema6a	1.10289
ENSMUSG00000019659	Ccdc12	4.8589
ENSMUSG00000019689	1110001J03Rik	14.8775
ENSMUSG00000019699	Akt3	3.01317
ENSMUSG00000019710	Mrpl24	6.08992
ENSMUSG00000019715	Gle1	3.50615
ENSMUSG00000019718	L3hypdh	3.32884
ENSMUSG00000019726	Lyst	1.1536
ENSMUSG00000019731	Slc35e1	7.98448
ENSMUSG00000019732	Calr3	15.8618
ENSMUSG00000019734	Tmc4	4.84666
ENSMUSG00000019737	Syne4	5.43648
ENSMUSG00000019738	Polr2i	3.86622
ENSMUSG00000019756	Prl8a1	1.3133
ENSMUSG00000019761	Krt10	8.54694
ENSMUSG00000019763	Rmnd1	3.84334
ENSMUSG00000019768	Esr1	3.73637
ENSMUSG00000019773	Fbxo5	9.79615
ENSMUSG00000019774	Mtrf1l	3.74883
ENSMUSG00000019777	Hdac2	3.30243
ENSMUSG00000019779	Frk	2.77583
ENSMUSG00000019782	Rwdd1	12.3934
ENSMUSG00000019790	Stxbp5	2.0609
ENSMUSG00000019791	Hint3	8.65428
ENSMUSG00000019792	Trmt11	2.16412
ENSMUSG00000019794	Katna1	3.73014
ENSMUSG00000019795	Pcmt1	4.69525
ENSMUSG00000019796	Lrp11	28.436
ENSMUSG00000019797	1700021F05Rik	2.69782
ENSMUSG00000019802	Sec63	12.1661
ENSMUSG00000019804	Snx3	7.03921
ENSMUSG00000019808	Adat2	10.3203
ENSMUSG00000019809	Pex3	5.28747
ENSMUSG00000019810	Fuca2	6.14179
ENSMUSG00000019813	Cep57l1	1.82317
ENSMUSG00000019814	Ltv1	2.6945
ENSMUSG00000019818	Cd164	21.6541
ENSMUSG00000019820	Utrn	4.35066
ENSMUSG00000019822	Smpd2	2.17316
ENSMUSG00000019826	Zbtb24	4.90551
ENSMUSG00000019831	Wasf1	2.02166
ENSMUSG00000019832	Rab32	2.94752
ENSMUSG00000019837	Gtf3c6	4.47145
ENSMUSG00000019838	Slc16a10	8.56468
ENSMUSG00000019841	Rev3l	1.46076
ENSMUSG00000019842	Traf3ip2	1.92996
ENSMUSG00000019843	Fyn	2.18317
ENSMUSG00000019846	Lama4	1.83582
ENSMUSG00000019849	Prep	3.6323
ENSMUSG00000019854	Reps1	2.91602
ENSMUSG00000019857	Asf1a	3.76618
ENSMUSG00000019861	Gopc	2.799
ENSMUSG00000019863	Qrsl1	3.01023
ENSMUSG00000019864	Rtn4ip1	8.02759
ENSMUSG00000019866	Aim1	2.41222
ENSMUSG00000019868	Vta1	2.6678
ENSMUSG00000019872	Smpdl3a	19.2214
ENSMUSG00000019873	Reep3	38.8566
ENSMUSG00000019874	Fabp7	1.43705
ENSMUSG00000019876	Pkib	4.06403
ENSMUSG00000019877	Serinc1	35.4929
ENSMUSG00000019878	Hsf2	1.85061
ENSMUSG00000019880	Rspo3	1.85645
ENSMUSG00000019883	Echdc1	10.085
ENSMUSG00000019889	Ptprk	2.78188
ENSMUSG00000019891	Dcbld1	2.29717
ENSMUSG00000019897	Ccdc59	3.2382
ENSMUSG00000019906	Lin7a	5.10689
ENSMUSG00000019907	Ppp1r12a	1.82112
ENSMUSG00000019916	P4ha1	3.33398
ENSMUSG00000019917	2017-09-10	3.44293
ENSMUSG00000019920	Lims1	4.27283
ENSMUSG00000019923	Zwint	13.4945
ENSMUSG00000019927	Ube2d1	4.39169
ENSMUSG00000019935	Slc17a8	10.2835
ENSMUSG00000019942	Cdk1	3.07911
ENSMUSG00000019943	Atp2b1	2.84825
ENSMUSG00000019944	Rhobtb1	2.35885
ENSMUSG00000019945	1700040L02Rik	6.80221
ENSMUSG00000019947	Arid5b	6.83686
ENSMUSG00000019948	Actr6	4.30374
ENSMUSG00000019951	Uhrf1bp1l	3.72133
ENSMUSG00000019952	Poc1b	7.05065
ENSMUSG00000019961	Tmpo	2.51975
ENSMUSG00000019966	Kitl	2.54792
ENSMUSG00000019969	Psen1	3.03137
ENSMUSG00000019970	Sgk1	39.1757
ENSMUSG00000019971	Cep290	2.58233
ENSMUSG00000019975	Ikbip	14.2523
ENSMUSG00000019977	Hbs1l	3.94433
ENSMUSG00000019978	Epb4.1l2	5.3046
ENSMUSG00000019979	Apaf1	1.9708
ENSMUSG00000019984	Med23	3.7346
ENSMUSG00000019987	Arg1	9.12642
ENSMUSG00000019988	Nedd1	2.92407
ENSMUSG00000019989	Enpp3	5.88342
ENSMUSG00000019990	Pde7b	1.90102
ENSMUSG00000019996	Map7	2.11514
ENSMUSG00000019997	Ctgf	3.26491
ENSMUSG00000019998	Stx7	2.76295
ENSMUSG00000020003	Pex7	13.0989
ENSMUSG00000020009	Ifngr1	5.91562
ENSMUSG00000020010	Vnn3	13.0722
ENSMUSG00000020015	Cdk17	1.65878
ENSMUSG00000020017	Hal	2.99944
ENSMUSG00000020018	Snrpf	28.1848
ENSMUSG00000020019	Ntn4	3.10714
ENSMUSG00000020021	Fgd6	1.66778
ENSMUSG00000020022	Ndufa12	18.5584
ENSMUSG00000020023	Tmcc3	3.52587
ENSMUSG00000020024	Cep83	6.68107
ENSMUSG00000020027	Socs2	2.41583
ENSMUSG00000020029	Nudt4	4.04917
ENSMUSG00000020032	Nuak1	2.00895
ENSMUSG00000020034	Tcp11l2	4.4963
ENSMUSG00000020037	Rfx4	2.2162
ENSMUSG00000020038	Cry1	2.4381
ENSMUSG00000020042	Btbd11	1.22753
ENSMUSG00000020044	Timp3	4.55961
ENSMUSG00000020048	Hsp90b1	12.8823
ENSMUSG00000020051	Pah	14.845
ENSMUSG00000020052	Ascl1	0.602424
ENSMUSG00000020053	Igf1	6.97349
ENSMUSG00000020056	Ccdc53	5.23545
ENSMUSG00000020057	Dram1	3.05431
ENSMUSG00000020063	Sirt1	6.63014
ENSMUSG00000020064	Herc4	2.2715
ENSMUSG00000020069	Hnrnph3	3.53453
ENSMUSG00000020070	Rufy2	4.11692
ENSMUSG00000020072	Pbld2	13.883
ENSMUSG00000020074	Ccar1	2.86559
ENSMUSG00000020075	Ddx21	7.95804
ENSMUSG00000020076	Ddx50	13.683
ENSMUSG00000020078	Vps26a	4.68993
ENSMUSG00000020079	Supv3l1	5.28226
ENSMUSG00000020085	Aifm2	4.53897
ENSMUSG00000020086	H2afy2	3.31955
ENSMUSG00000020087	Tysnd1	2.43056
ENSMUSG00000020088	Sar1a	7.28587
ENSMUSG00000020089	Ppa1	8.78159
ENSMUSG00000020091	Eif4ebp2	2.64279
ENSMUSG00000020092	Pald1	2.16784
ENSMUSG00000020097	Sgpl1	3.56829
ENSMUSG00000020099	Unc5b	5.77955
ENSMUSG00000020100	Slc29a3	2.31443
ENSMUSG00000020101	4632428N05Rik	2.87549
ENSMUSG00000020102	Slc16a7	17.6862
ENSMUSG00000020105	Lrig3	2.14826
ENSMUSG00000020107	Anapc16	6.80708
ENSMUSG00000020108	Ddit4	6.68639
ENSMUSG00000020109	Dnajb12	3.8219
ENSMUSG00000020111	Micu1	10.886
ENSMUSG00000020114	Cand1	2.41403
ENSMUSG00000020115	Tbk1	3.3918
ENSMUSG00000020116	Pno1	21.1207
ENSMUSG00000020122	Egfr	2.04563
ENSMUSG00000020123	Avpr1a	2.29376
ENSMUSG00000020124	Usp15	3.52435
ENSMUSG00000020128	Vps54	7.13366
ENSMUSG00000020130	Tbc1d15	2.68699
ENSMUSG00000020132	Rab21	6.50143
ENSMUSG00000020133	2310011J03Rik	2.73662
ENSMUSG00000020134	Peli1	3.09918
ENSMUSG00000020142	Slc1a4	4.86437
ENSMUSG00000020143	Dock2	2.86069
ENSMUSG00000020149	Rab1	2.67266
ENSMUSG00000020150	Gamt	37.3104
ENSMUSG00000020152	Actr2	15.3354
ENSMUSG00000020153	Ndufs7	6.36456
ENSMUSG00000020154	Ptprb	3.0455
ENSMUSG00000020156	Mum1	2.25432
ENSMUSG00000020160	Meis1	1.89437
ENSMUSG00000020163	Uqcr11	15.5297
ENSMUSG00000020166	Cnot2	1.87755
ENSMUSG00000020167	Tcf3	3.46146
ENSMUSG00000020170	Frs2	2.88666
ENSMUSG00000020171	Yeats4	6.71939
ENSMUSG00000020173	Cobl	1.97892
ENSMUSG00000020176	Grb10	4.87771
ENSMUSG00000020178	Adora2a	10.1362
ENSMUSG00000020180	Snrpd3	6.29695
ENSMUSG00000020182	Ddc	1.78235
ENSMUSG00000020183	Cpm	33.6212
ENSMUSG00000020184	Mdm2	8.21883
ENSMUSG00000020186	Csrp2	7.7131
ENSMUSG00000020189	Osbpl8	2.62536
ENSMUSG00000020190	Mknk2	5.29135
ENSMUSG00000020196	Cabin1	2.61718
ENSMUSG00000020198	Ap3d1	3.38221
ENSMUSG00000020205	Phlda1	10.2455
ENSMUSG00000020211	Sf3a2	3.98728
ENSMUSG00000020212	Mdm1	6.34144
ENSMUSG00000020219	Timm13	16.5812
ENSMUSG00000020220	Vps13d	3.00915
ENSMUSG00000020224	Llph	8.5625
ENSMUSG00000020225	Tmbim4	17.0979
ENSMUSG00000020227	Irak3	13.5557
ENSMUSG00000020228	Helb	2.44083
ENSMUSG00000020231	Dip2a	5.20766
ENSMUSG00000020232	Hmg20b	34.2049
ENSMUSG00000020235	Fzr1	3.21885
ENSMUSG00000020238	Ncln	6.40744
ENSMUSG00000020246	Hcfc2	3.05871
ENSMUSG00000020248	Nfyb	14.1909
ENSMUSG00000020250	Txnrd1	3.29837
ENSMUSG00000020255	D10Wsu102e	7.91891
ENSMUSG00000020257	Wdr82	4.13819
ENSMUSG00000020258	Glyctk	3.96208
ENSMUSG00000020260	Pofut2	27.611
ENSMUSG00000020261	Slc36a1	3.53417
ENSMUSG00000020262	Adarb1	2.70989
ENSMUSG00000020263	Appl2	3.98398
ENSMUSG00000020265	Sumo3	3.51154
ENSMUSG00000020267	Hint1	10.2662
ENSMUSG00000020268	Lyrm7	5.70685
ENSMUSG00000020271	Fbxw11	2.9215
ENSMUSG00000020272	Stk10	2.51619
ENSMUSG00000020273	Papolg	2.89547
ENSMUSG00000020275	Rel	6.46809
ENSMUSG00000020277	Pfkl	5.29344
ENSMUSG00000020280	Pus10	2.13211
ENSMUSG00000020283	Pex13	2.88517
ENSMUSG00000020284	1810043G02Rik	19.2643
ENSMUSG00000020287	Mpg	12.1888
ENSMUSG00000020288	Ahsa2	3.11564
ENSMUSG00000020289	Nprl3	4.44528
ENSMUSG00000020290	Xpo1	2.49146
ENSMUSG00000020300	Cpeb4	2.63855
ENSMUSG00000020305	Asb3	1.61637
ENSMUSG00000020307	Cdc34	9.58475
ENSMUSG00000020308	Tpgs1	6.30513
ENSMUSG00000020309	Chac2	4.29311
ENSMUSG00000020311	Erlec1	12.7481
ENSMUSG00000020315	Sptbn1	7.5357
ENSMUSG00000020321	Mdh1	10.2386
ENSMUSG00000020328	Nudcd2	17.4788
ENSMUSG00000020329	Polrmt	2.28484
ENSMUSG00000020330	Hmmr	1.90164
ENSMUSG00000020334	Slc22a4	6.52148
ENSMUSG00000020335	Zfp354b	2.93782
ENSMUSG00000020346	Mgat1	2.14247
ENSMUSG00000020349	Ppp2ca	2.85922
ENSMUSG00000020357	Flt4	7.73282
ENSMUSG00000020358	Hnrnpab	7.93488
ENSMUSG00000020359	Phykpl	6.87061
ENSMUSG00000020361	Hspa4	2.6019
ENSMUSG00000020362	Cnot6	44.0057
ENSMUSG00000020364	Zfp354a	2.42454
ENSMUSG00000020366	Mapk9	6.91077
ENSMUSG00000020372	Gnb2l1	16.1353
ENSMUSG00000020375	Rufy1	2.76357
ENSMUSG00000020377	Ltc4s	3.2043
ENSMUSG00000020380	Rad50	1.78967
ENSMUSG00000020381	3010026O09Rik	4.85804
ENSMUSG00000020385	Clk4	3.52109
ENSMUSG00000020386	Sar1b	9.62971
ENSMUSG00000020387	Jade2	2.43518
ENSMUSG00000020388	Pdlim4	1.62524
ENSMUSG00000020390	Ube2b	8.79702
ENSMUSG00000020392	Cdkn2aipnl	5.28157
ENSMUSG00000020393	Kremen1	6.07375
ENSMUSG00000020397	Med7	8.98739
ENSMUSG00000020400	Tnip1	3.81634
ENSMUSG00000020402	Vdac1	35.6124
ENSMUSG00000020409	Slu7	4.38751
ENSMUSG00000020412	Ascc2	3.15762
ENSMUSG00000020413	Hus1	2.44068
ENSMUSG00000020415	Pttg1	4.03901
ENSMUSG00000020420	Zfp607	4.07317
ENSMUSG00000020422	Tns3	1.44922
ENSMUSG00000020424	Gatsl3	21.3521
ENSMUSG00000020429	Igfbp1	6.80198
ENSMUSG00000020430	Pes1	4.18434
ENSMUSG00000020432	Tcn2	17.1392
ENSMUSG00000020439	Smtn	4.03031
ENSMUSG00000020440	Arf5	27.4561
ENSMUSG00000020441	2310033P09Rik	2.51896
ENSMUSG00000020448	Rnf185	3.48611
ENSMUSG00000020451	Limk2	3.06957
ENSMUSG00000020453	Patz1	2.98948
ENSMUSG00000020454	Eif4enif1	3.53889
ENSMUSG00000020455	Trim11	3.52435
ENSMUSG00000020456	Ogdh	11.3784
ENSMUSG00000020457	Drg1	3.45259
ENSMUSG00000020459	Mtif2	3.07583
ENSMUSG00000020460	Rps27a	32.3221
ENSMUSG00000020462	Cfap36	9.41045
ENSMUSG00000020463	Smek2	2.71525
ENSMUSG00000020464	Pnpt1	10.7352
ENSMUSG00000020471	Pold2	1.68761
ENSMUSG00000020472	Zkscan17	6.54337
ENSMUSG00000020474	Polm	2.58644
ENSMUSG00000020475	Pgam2	2.93917
ENSMUSG00000020476	Dbnl	3.7143
ENSMUSG00000020482	Ccdc117	13.9957
ENSMUSG00000020483	Dynll2	5.174
ENSMUSG00000020484	Xbp1	1.83997
ENSMUSG00000020485	Supt4a	10.9862
ENSMUSG00000020486	2017-09-04	2.87808
ENSMUSG00000020491	2810021J22Rik	3.18278
ENSMUSG00000020492	Ska2	3.13515
ENSMUSG00000020495	Smg8	10.8665
ENSMUSG00000020496	Rnf187	14.6731
ENSMUSG00000020513	Tubd1	1.45864
ENSMUSG00000020514	Mrpl22	3.94382
ENSMUSG00000020515	Cnot8	4.49567
ENSMUSG00000020516	Rps6kb1	5.32511
ENSMUSG00000020520	Galnt10	5.04315
ENSMUSG00000020521	Rnft1	7.16972
ENSMUSG00000020522	Mfap3	3.90525
ENSMUSG00000020523	Fam114a2	4.00218
ENSMUSG00000020525	Ppm1d	5.96967
ENSMUSG00000020526	Znhit3	3.69729
ENSMUSG00000020527	Myo19	13.5703
ENSMUSG00000020528	Prpsap2	2.75908
ENSMUSG00000020530	Ggnbp2	2.71997
ENSMUSG00000020532	Acaca	4.64286
ENSMUSG00000020534	Shmt1	3.74402
ENSMUSG00000020536	Llgl1	3.11471
ENSMUSG00000020537	Drg2	3.52222
ENSMUSG00000020538	Srebf1	2.37544
ENSMUSG00000020541	Tom1l1	3.63423
ENSMUSG00000020544	Cox11	6.1034
ENSMUSG00000020547	Bzw2	3.81904
ENSMUSG00000020549	Elac2	6.44026
ENSMUSG00000020553	Pctp	12.1941
ENSMUSG00000020561	Twistnb	2.58261
ENSMUSG00000020564	Atxn7l1	2.94561
ENSMUSG00000020570	Sypl	11.9292
ENSMUSG00000020572	Nampt	3.53065
ENSMUSG00000020573	Pik3cg	4.17601
ENSMUSG00000020576	Nbas	4.6079
ENSMUSG00000020577	Tspan13	7.261
ENSMUSG00000020580	Rock2	2.43031
ENSMUSG00000020589	Fam49a	1.01279
ENSMUSG00000020590	Snx13	1.77369
ENSMUSG00000020592	Sdc1	6.02615
ENSMUSG00000020593	Lpin1	1.72866
ENSMUSG00000020594	Pum2	2.82892
ENSMUSG00000020601	Trib2	2.79537
ENSMUSG00000020604	Arsg	3.13158
ENSMUSG00000020605	Hs1bp3	1.89769
ENSMUSG00000020607	Fam84a	3.3186
ENSMUSG00000020608	Smc6	3.36328
ENSMUSG00000020609	Apob	10.0975
ENSMUSG00000020610	Amz2	5.39525
ENSMUSG00000020611	Gna13	5.56517
ENSMUSG00000020612	Prkar1a	4.11861
ENSMUSG00000020614	Fam20a	2.16923
ENSMUSG00000020620	Abca8b	15.0823
ENSMUSG00000020621	Rdh14	5.48651
ENSMUSG00000020623	Map2k6	3.45091
ENSMUSG00000020628	Trappc12	2.51627
ENSMUSG00000020629	Adi1	20.0749
ENSMUSG00000020630	Rnaseh1	2.93399
ENSMUSG00000020633	Dcdc2c	2.88098
ENSMUSG00000020634	Ubxn2a	8.31781
ENSMUSG00000020638	Cmpk2	2.50103
ENSMUSG00000020640	Itsn2	2.2799
ENSMUSG00000020641	Rsad2	7.57321
ENSMUSG00000020642	Rnf144a	1.16014
ENSMUSG00000020644	Id2	8.14295
ENSMUSG00000020647	Ncoa1	1.79736
ENSMUSG00000020648	Dus4l	5.17677
ENSMUSG00000020649	Rrm2	4.34603
ENSMUSG00000020650	Bcap29	27.5284
ENSMUSG00000020652	Cenpo	3.16178
ENSMUSG00000020653	Klf11	11.1797
ENSMUSG00000020656	Grhl1	2.34838
ENSMUSG00000020659	Cbll1	5.01554
ENSMUSG00000020661	Dnmt3a	2.95752
ENSMUSG00000020664	Dld	22.3269
ENSMUSG00000020668	Kif3c	4.46885
ENSMUSG00000020669	Sh3yl1	4.39737
ENSMUSG00000020671	Rab10	3.76841
ENSMUSG00000020672	Sntg2	2.17899
ENSMUSG00000020674	Pxdn	10.6224
ENSMUSG00000020677	Ddx52	5.59954
ENSMUSG00000020679	Hnf1b	2.52344
ENSMUSG00000020680	Taf15	3.62152
ENSMUSG00000020681	Ace	12.8931
ENSMUSG00000020687	Cdc27	1.96858
ENSMUSG00000020689	Itgb3	2.73095
ENSMUSG00000020691	Mettl2	3.909
ENSMUSG00000020692	Nle1	11.5483
ENSMUSG00000020694	Tlk2	1.93798
ENSMUSG00000020696	Rffl	2.39225
ENSMUSG00000020697	Lig3	3.75731
ENSMUSG00000020700	Map3k3	2.32883
ENSMUSG00000020701	Tmem132e	1.66202
ENSMUSG00000020705	Ddx42	3.58195
ENSMUSG00000020706	Ftsj3	3.26088
ENSMUSG00000020707	Rnf135	3.32229
ENSMUSG00000020708	Psmc5	3.75552
ENSMUSG00000020709	Adap2	3.35735
ENSMUSG00000020715	Ern1	3.38558
ENSMUSG00000020716	Nf1	3.02654
ENSMUSG00000020717	Pecam1	5.88831
ENSMUSG00000020718	Polg2	8.15348
ENSMUSG00000020719	Ddx5	4.8706
ENSMUSG00000020720	Psmd12	2.92393
ENSMUSG00000020721	Helz	1.95809
ENSMUSG00000020733	Slc9a3r1	4.61669
ENSMUSG00000020736	Nt5c	5.46451
ENSMUSG00000020737	Hn1	33.2889
ENSMUSG00000020738	Sumo2	4.79867
ENSMUSG00000020739	Nup85	4.42619
ENSMUSG00000020740	Gga3	3.43719
ENSMUSG00000020741	Cluh	3.77108
ENSMUSG00000020743	Mif4gd	2.2019
ENSMUSG00000020744	Slc25a19	3.3208
ENSMUSG00000020745	Pafah1b1	2.5515
ENSMUSG00000020747	2310067B10Rik	6.55725
ENSMUSG00000020752	Recql5	2.43005
ENSMUSG00000020755	Sap30bp	3.00678
ENSMUSG00000020766	Galk1	9.17663
ENSMUSG00000020770	Unk	3.60062
ENSMUSG00000020773	Trim47	5.84184
ENSMUSG00000020774	Aspa	5.47949
ENSMUSG00000020775	Mrpl38	13.2336
ENSMUSG00000020777	Acox1	12.1619
ENSMUSG00000020778	Ten1	5.90875
ENSMUSG00000020780	Srp68	2.54113
ENSMUSG00000020781	Tsen54	5.32236
ENSMUSG00000020782	Llgl2	2.28426
ENSMUSG00000020783	1200014J11Rik	2.92525
ENSMUSG00000020790	Ankfy1	3.39025
ENSMUSG00000020792	Exoc7	4.07352
ENSMUSG00000020794	Ube2g1	4.07067
ENSMUSG00000020801	Med31	5.85894
ENSMUSG00000020802	Ube2o	2.98128
ENSMUSG00000020803	Txndc17	24.675
ENSMUSG00000020806	Rhbdf2	3.6213
ENSMUSG00000020807	4933427D14Rik	2.76541
ENSMUSG00000020810	Cygb	12.5629
ENSMUSG00000020812	1810032O08Rik	8.70482
ENSMUSG00000020814	Mxra7	17.8677
ENSMUSG00000020817	Rabep1	2.07599
ENSMUSG00000020818	Mfsd11	5.10788
ENSMUSG00000020821	Kif1c	6.76233
ENSMUSG00000020823	Sec14l1	2.50402
ENSMUSG00000020827	Mink1	5.09671
ENSMUSG00000020828	Pld2	3.13696
ENSMUSG00000020829	Slc46a1	14.9342
ENSMUSG00000020830	Vmo1	2.00077
ENSMUSG00000020832	Eral1	5.87521
ENSMUSG00000020834	Dhrs13	6.31813
ENSMUSG00000020840	Blmh	4.34812
ENSMUSG00000020841	Cpd	8.62377
ENSMUSG00000020843	Timm22	4.60652
ENSMUSG00000020844	Nxn	2.02951
ENSMUSG00000020847	Rph3al	5.28423
ENSMUSG00000020849	Ywhae	6.2714
ENSMUSG00000020850	Prpf8	5.03323
ENSMUSG00000020857	Nme2	43.1583
ENSMUSG00000020859	Spag9	3.71062
ENSMUSG00000020863	Luc7l3	2.91221
ENSMUSG00000020864	Ankrd40	12.1531
ENSMUSG00000020865	Abcc3	18.9785
ENSMUSG00000020868	Xylt2	3.84258
ENSMUSG00000020869	Lrrc59	4.31127
ENSMUSG00000020873	Slc35b1	9.6089
ENSMUSG00000020876	Snx11	3.10292
ENSMUSG00000020877	Scrn2	5.19143
ENSMUSG00000020878	Lrrc46	3.61336
ENSMUSG00000020883	Fbxl20	3.5079
ENSMUSG00000020884	Asgr1	9.61458
ENSMUSG00000020888	Dvl2	10.8785
ENSMUSG00000020893	Per1	8.33984
ENSMUSG00000020895	Tmem107	13.7273
ENSMUSG00000020898	Ctc1	3.45834
ENSMUSG00000020899	Pfas	4.72251
ENSMUSG00000020900	Myh10	16.8375
ENSMUSG00000020901	Pik3r5	8.53389
ENSMUSG00000020903	Stx8	3.17758
ENSMUSG00000020910	Adprm	4.43092
ENSMUSG00000020917	Acly	5.44366
ENSMUSG00000020918	Kat2a	3.66649
ENSMUSG00000020919	Stat5b	3.17976
ENSMUSG00000020921	Tmem101	5.53687
ENSMUSG00000020922	Lsm12	5.31646
ENSMUSG00000020923	Ubtf	5.59678
ENSMUSG00000020925	Ccdc43	3.73031
ENSMUSG00000020926	Adam11	8.12855
ENSMUSG00000020929	Eftud2	4.18487
ENSMUSG00000020935	Dcakd	3.79914
ENSMUSG00000020936	Nmt1	3.36546
ENSMUSG00000020941	Map3k14	4.80034
ENSMUSG00000020946	Gosr2	5.99237
ENSMUSG00000020948	Klhl28	3.76875
ENSMUSG00000020949	Fkbp3	11.9251
ENSMUSG00000020952	Scfd1	2.75517
ENSMUSG00000020954	Strn3	3.17288
ENSMUSG00000020955	Ap4s1	9.47355
ENSMUSG00000020956	Dtd2	8.44086
ENSMUSG00000020961	Ston2	1.90146
ENSMUSG00000020962	Gtf2a1	4.24375
ENSMUSG00000020964	Sel1l	5.68743
ENSMUSG00000020973	Dnaaf2	8.86957
ENSMUSG00000020974	Pole2	1.39122
ENSMUSG00000020978	Klhdc2	4.19274
ENSMUSG00000020982	Nemf	2.6655
ENSMUSG00000020986	Sec23a	8.36291
ENSMUSG00000020988	L2hgdh	32.645
ENSMUSG00000020993	Trappc6b	14.3795
ENSMUSG00000020994	Pnn	4.3118
ENSMUSG00000021000	Ctage5	5.56654
ENSMUSG00000021003	Galc	11.0987
ENSMUSG00000021009	Ptpn21	3.44748
ENSMUSG00000021012	Zc3h14	3.30318
ENSMUSG00000021013	Ttc8	15.7318
ENSMUSG00000021018	Polr2h	4.59752
ENSMUSG00000021022	Ppp2r3c	12.143
ENSMUSG00000021023	1110008L16Rik	2.5135
ENSMUSG00000021024	Psma6	5.51808
ENSMUSG00000021025	Nfkbia	7.95734
ENSMUSG00000021027	Ralgapa1	1.81226
ENSMUSG00000021028	Mbip	3.09195
ENSMUSG00000021033	Gstz1	9.73387
ENSMUSG00000021036	Sptlc2	3.15946
ENSMUSG00000021037	Ahsa1	4.35654
ENSMUSG00000021038	Vipas39	2.11162
ENSMUSG00000021039	Snw1	4.98291
ENSMUSG00000021040	Slirp	5.2947
ENSMUSG00000021044	Adck1	1.94571
ENSMUSG00000021048	Mthfd1	6.10091
ENSMUSG00000021051	Ppp2r5e	1.90464
ENSMUSG00000021054	Sgpp1	7.61548
ENSMUSG00000021065	Fut8	0.983132
ENSMUSG00000021066	Atl1	2.59582
ENSMUSG00000021067	Sav1	3.62692
ENSMUSG00000021068	Nin	2.16915
ENSMUSG00000021069	Pygl	9.55713
ENSMUSG00000021072	Tmx1	14.7445
ENSMUSG00000021076	Actr10	5.06932
ENSMUSG00000021079	Timm9	2.4907
ENSMUSG00000021087	Rtn1	1.7701
ENSMUSG00000021091	Serpina3n	23.5856
ENSMUSG00000021094	Dhrs7	35.7421
ENSMUSG00000021096	Ppm1a	48.5297
ENSMUSG00000021097	Clmn	4.22271
ENSMUSG00000021102	Glrx5	13.6856
ENSMUSG00000021103	Mnat1	3.62203
ENSMUSG00000021108	Prkch	1.27677
ENSMUSG00000021109	Hif1a	3.81422
ENSMUSG00000021111	Papola	3.31727
ENSMUSG00000021112	Mpp5	2.28412
ENSMUSG00000021113	Snapc1	2.9212
ENSMUSG00000021114	Atp6v1d	4.27804
ENSMUSG00000021115	Vrk1	3.44594
ENSMUSG00000021116	Eif2s1	3.65892
ENSMUSG00000021120	Pigh	9.75302
ENSMUSG00000021124	Vti1b	8.50379
ENSMUSG00000021127	Zfp36l1	11.5657
ENSMUSG00000021131	Erh	6.98075
ENSMUSG00000021133	Susd6	2.4162
ENSMUSG00000021134	Srsf5	4.80933
ENSMUSG00000021135	Slc10a1	11.236
ENSMUSG00000021136	Smoc1	5.58963
ENSMUSG00000021139	Gm20498	9.23459
ENSMUSG00000021140	Pcnx	5.10447
ENSMUSG00000021143	Pacs2	2.23256
ENSMUSG00000021144	Mta1	15.238
ENSMUSG00000021147	Wdr37	2.97859
ENSMUSG00000021149	Gtpbp4	2.56287
ENSMUSG00000021156	Zmynd11	5.43625
ENSMUSG00000021171	Esyt2	18.122
ENSMUSG00000021177	Tdp1	2.73909
ENSMUSG00000021178	Psmc1	6.67772
ENSMUSG00000021179	Nrde2	2.48389
ENSMUSG00000021180	Rps6ka5	1.50454
ENSMUSG00000021182	Ccdc88c	4.27264
ENSMUSG00000021185	9030617O03Rik	5.14068
ENSMUSG00000021186	Fbln5	28.8762
ENSMUSG00000021187	Tc2n	4.64628
ENSMUSG00000021188	Trip11	1.97395
ENSMUSG00000021189	Atxn3	3.27294
ENSMUSG00000021190	Lgmn	6.88573
ENSMUSG00000021192	Golga5	3.74511
ENSMUSG00000021193	Pitrm1	35.8262
ENSMUSG00000021196	Pfkp	6.77312
ENSMUSG00000021200	Asb2	2.42646
ENSMUSG00000021209	Ppp4r4	3.95922
ENSMUSG00000021210	Akr1c6	13.7555
ENSMUSG00000021211	Akr1c12	13.1776
ENSMUSG00000021213	Akr1c13	48.084
ENSMUSG00000021215	Net1	4.36493
ENSMUSG00000021218	Gdi2	11.2582
ENSMUSG00000021221	Dpf3	1.79241
ENSMUSG00000021222	Dcaf4	4.49302
ENSMUSG00000021224	Numb	1.3448
ENSMUSG00000021226	Acot2	6.30606
[truncated: 8,972 more rows]
