# Supplementary material for: The CCR4–NOT complex maintains liver homeostasis through mRNA deadenylation
Source: Life Sci Alliance. 2020 Apr 1;3(5):e201900494. doi: 10.26508/lsa.201900494 (PMC7119370; doi:10.26508/lsa.201900494)
Supplement: Supplementary file 6 [file LSA-2019-00494_TableS6.xlsx]

## Sheet: Sheet1
Table S6. Comparisons of mRNA half-lives in livers from control and Cnot1-LKO mice. Half-lives of mRNAs were calculated using the results of RNA-seq of livers from control and Cnot1-LKO mice that were treated with Act. D. (See the Materials and Methods section for details.) and shown in the lists. Differences of mRNA half-lives (Cnot1-LKO/Cnot1fl/fl) are shown with ensemble Gene IDs and gene symb…
Comparison of mRNA half-lives in livers from control and Cnot1-LKO mice
Ensembl ID	Gene_Symbol	mRNA half-life (h)		Fold change
		Cnot1(fl/fl)	Cnot1-LKO	Cnot1-LKO/Cnot1(fl/fl)
ENSMUSG00000000001	Gnai3	6.48983	18.0192	2.77652
ENSMUSG00000000028	Cdc45	2.9517	39.407	13.3506
ENSMUSG00000000049	Apoh	29.5768	30.5057	1.03141
ENSMUSG00000000056	Narf	3.53507	47.2464	13.3651
ENSMUSG00000000058	Cav2	5.20427	22.633	4.34893
ENSMUSG00000000085	Scmh1	2.52684	12.1343	4.80214
ENSMUSG00000000088	Cox5a	9.56908	9.76357	1.02033
ENSMUSG00000000093	Tbx2	5.23476	5.72432	1.09352
ENSMUSG00000000120	Ngfr	10.3213	14.0732	1.3635
ENSMUSG00000000127	Fer	2.03733	13.7162	6.73244
ENSMUSG00000000131	Xpo6	2.82469	12.9199	4.57392
ENSMUSG00000000134	Tfe3	5.19966	13.9894	2.69045
ENSMUSG00000000148	Brat1	3.20521	23.7821	7.41982
ENSMUSG00000000149	Gna12	6.43896	8.67702	1.34758
ENSMUSG00000000154	Slc22a18	17.1365	12.3289	0.719456
ENSMUSG00000000159	Igsf5	7.99278	9.4057	1.17677
ENSMUSG00000000171	Sdhd	18.9676	11.8994	0.627356
ENSMUSG00000000194	Gpr107	2.18651	14.0359	6.41931
ENSMUSG00000000247	Lhx2	3.43183	8.35136	2.4335
ENSMUSG00000000253	Gmpr	0.964046	4.80534	4.98456
ENSMUSG00000000266	Mid2	2.69668	32.7613	12.1488
ENSMUSG00000000275	Trim25	2.94156	20.5295	6.97912
ENSMUSG00000000276	Dgke	5.94363	20.4372	3.4385
ENSMUSG00000000278	Scpep1	22.0254	24.4248	1.10893
ENSMUSG00000000282	Mnt	4.33641	12.9449	2.98516
ENSMUSG00000000290	Itgb2	10.5807	21.0224	1.98686
ENSMUSG00000000295	Hddc2	5.25337	8.27974	1.57608
ENSMUSG00000000296	Tpd52l1	40.5302	17.4691	0.431014
ENSMUSG00000000301	Pemt	8.1125	10.2533	1.26389
ENSMUSG00000000303	Cdh1	9.03311	49.2854	5.45608
ENSMUSG00000000317	Bcl6b	6.50829	5.81849	0.894012
ENSMUSG00000000325	Arvcf	3.01275	9.05725	3.0063
ENSMUSG00000000326	Comt	4.97166	13.6083	2.73717
ENSMUSG00000000339	Rtca	7.85018	12.7194	1.62026
ENSMUSG00000000346	Dazap2	11.6154	17.4102	1.49889
ENSMUSG00000000355	Mcts1	8.148	24.3804	2.99219
ENSMUSG00000000374	Trappc10	2.80778	10.5598	3.76092
ENSMUSG00000000378	Ccm2	5.66347	16.0684	2.8372
ENSMUSG00000000384	Tbrg4	4.33043	15.469	3.57216
ENSMUSG00000000385	Tmprss2	3.42123	21.8058	6.37366
ENSMUSG00000000386	Mx1	6.0595	10.1128	1.66892
ENSMUSG00000000399	Ndufa9	12.483	16.822	1.34759
ENSMUSG00000000409	Lck	11.0949	13.301	1.19884
ENSMUSG00000000420	Galnt1	6.98675	11.5692	1.65588
ENSMUSG00000000439	Mkrn2	2.63956	15.5065	5.87465
ENSMUSG00000000440	Pparg	6.12031	8.31291	1.35825
ENSMUSG00000000441	Raf1	2.08358	14.7402	7.07442
ENSMUSG00000000486	2017-09-01	15.8214	8.95339	0.565905
ENSMUSG00000000489	Pdgfb	6.75709	41.1473	6.0895
ENSMUSG00000000530	Acvrl1	2.33566	8.0117	3.43017
ENSMUSG00000000531	Grasp	4.28992	9.73336	2.26889
ENSMUSG00000000532	Acvr1b	2.47516	14.1319	5.70949
ENSMUSG00000000538	Tom1l2	1.61106	7.82168	4.85499
ENSMUSG00000000552	Zfp385a	3.86084	15.2377	3.94674
ENSMUSG00000000555	Itga5	2.24038	19.0925	8.52199
ENSMUSG00000000561	Wdr77	3.27597	11.1612	3.40697
ENSMUSG00000000563	Atp5f1	21.7027	26.0695	1.20121
ENSMUSG00000000568	Hnrnpd	3.42098	21.2444	6.21004
ENSMUSG00000000579	Dynlt1c	2.54646	45.768	17.9732
ENSMUSG00000000581	C1d	12.4417	17.9208	1.44038
ENSMUSG00000000600	Krit1	3.40762	13.5235	3.96862
ENSMUSG00000000605	Clcn4-2	15.0526	46.292	3.07536
ENSMUSG00000000628	Hk2	1.79973	4.67287	2.59643
ENSMUSG00000000631	Myo18a	3.44731	19.6378	5.69655
ENSMUSG00000000673	Haao	6.258	24.8809	3.97586
ENSMUSG00000000682	Cd52	7.42354	11.8114	1.59107
ENSMUSG00000000686	Abhd15	2.23922	14.6948	6.56246
ENSMUSG00000000693	Loxl3	7.20705	9.85601	1.36755
ENSMUSG00000000708	Kat2b	30.3557	20.9126	0.68892
ENSMUSG00000000711	Rab5b	10.8166	23.9611	2.21521
ENSMUSG00000000732	Icosl	3.90487	23.7863	6.09143
ENSMUSG00000000739	Sult5a1	6.42464	21.4725	3.34221
ENSMUSG00000000743	Chmp1a	7.37542	14.6977	1.9928
ENSMUSG00000000751	Rpa1	3.8944	12.183	3.12835
ENSMUSG00000000753	Serpinf1	21.698	21.7812	1.00383
ENSMUSG00000000759	Tubgcp3	2.60246	13.3761	5.13979
ENSMUSG00000000782	Tcf7	3.3994	7.48134	2.20078
ENSMUSG00000000804	Usp32	2.18386	20.5805	9.42392
ENSMUSG00000000811	Txnrd3	2.74789	23.9606	8.71962
ENSMUSG00000000823	Znf512b	4.75452	18.1136	3.80976
ENSMUSG00000000826	Dnajc5	3.91351	16.5904	4.23927
ENSMUSG00000000827	Tpd52l2	3.65141	10.132	2.77483
ENSMUSG00000000838	Fmr1	3.68874	15.8137	4.28703
ENSMUSG00000000876	Pxmp4	1.57312	22.3822	14.2279
ENSMUSG00000000881	Dlg3	1.63448	8.70395	5.3252
ENSMUSG00000000902	Smarcb1	2.17835	14.4998	6.65632
ENSMUSG00000000915	Hip1r	4.79711	32.9456	6.86779
ENSMUSG00000000916	Nsun5	4.09573	13.1805	3.21811
ENSMUSG00000000934	Top1mt	6.37994	25.8685	4.05466
ENSMUSG00000000957	Mmp14	3.85829	16.9758	4.39982
ENSMUSG00000000958	Slc7a7	2.56131	7.7105	3.01038
ENSMUSG00000000959	Oxa1l	5.65835	13.9242	2.46083
ENSMUSG00000001018	Snapin	14.2262	22.5885	1.58781
ENSMUSG00000001029	Icam2	3.07154	6.60233	2.14951
ENSMUSG00000001034	Mapk7	4.00893	10.4437	2.6051
ENSMUSG00000001036	Epn2	2.4485	12.3981	5.06353
ENSMUSG00000001052	Sec24b	1.92791	15.245	7.90751
ENSMUSG00000001053	N4bp3	3.3106	39.0735	11.8025
ENSMUSG00000001054	Rmnd5b	3.61792	10.2218	2.82531
ENSMUSG00000001056	Nhp2	16.3085	20.6104	1.26378
ENSMUSG00000001062	Vps9d1	3.09258	7.74082	2.50303
ENSMUSG00000001065	Zfp276	3.33559	11.6764	3.50055
ENSMUSG00000001082	Mfsd10	8.83554	8.61089	0.974574
ENSMUSG00000001089	Luzp1	2.72532	12.9033	4.73462
ENSMUSG00000001095	Slc13a2	0.82634	11.5577	13.9866
ENSMUSG00000001098	Kctd10	4.87815	14.7096	3.0154
ENSMUSG00000001100	Poldip2	13.6612	21.1898	1.55109
ENSMUSG00000001105	Ift20	5.32841	12.6865	2.38091
ENSMUSG00000001123	Lgals9	5.56295	9.54793	1.71634
ENSMUSG00000001127	Araf	6.3302	19.7086	3.11343
ENSMUSG00000001128	Cfp	5.2558	19.935	3.79295
ENSMUSG00000001134	Uxt	5.15296	7.44545	1.44489
ENSMUSG00000001138	Cnnm3	3.0671	18.5979	6.06369
ENSMUSG00000001143	Lman2l	5.69483	25.8746	4.54353
ENSMUSG00000001150	Mcm3ap	2.94007	14.472	4.92234
ENSMUSG00000001151	Pcnt	1.77411	13.4895	7.60354
ENSMUSG00000001155	Ftcd	7.9035	49.4228	6.25328
ENSMUSG00000001157	Gmcl1	10.6516	15.8462	1.48768
ENSMUSG00000001158	Snrnp27	4.17931	24.7967	5.9332
ENSMUSG00000001166	Oas1c	3.15903	7.59501	2.40422
ENSMUSG00000001173	Ocrl	6.83758	11.4541	1.67517
ENSMUSG00000001175	Calm1	7.27071	17.6512	2.42772
ENSMUSG00000001211	Agpat3	15.5707	20.4735	1.31488
ENSMUSG00000001227	Sema6b	9.6102	9.26224	0.963794
ENSMUSG00000001229	Dpp9	2.44378	17.0296	6.96853
ENSMUSG00000001240	Ramp2	5.47057	8.1891	1.49694
ENSMUSG00000001247	Lsr	5.34549	36.9825	6.91845
ENSMUSG00000001248	Gramd1a	6.74716	10.4239	1.54493
ENSMUSG00000001249	Hpn	9.8304	26.1026	2.65529
ENSMUSG00000001280	Sp1	2.24824	39.1817	17.4277
ENSMUSG00000001281	Itgb7	9.45198	12.9846	1.37374
ENSMUSG00000001285	Myg1	5.54803	22.2197	4.00498
ENSMUSG00000001288	Rarg	2.32245	7.75914	3.34093
ENSMUSG00000001289	Pfdn5	17.9657	9.29578	0.517418
ENSMUSG00000001300	Efnb2	3.7737	2.3377	0.61947
ENSMUSG00000001305	Rrp15	2.81401	13.7791	4.8966
ENSMUSG00000001313	Rnd2	14.8354	7.27706	0.490519
ENSMUSG00000001348	Acp5	24.1118	15.017	0.622807
ENSMUSG00000001366	Fbxo9	5.47795	21.7656	3.97331
ENSMUSG00000001376	Ccdc132	1.50556	10.6878	7.09891
ENSMUSG00000001380	Hars	5.84474	24.0408	4.11324
ENSMUSG00000001383	Zmat2	5.05848	20.9323	4.13806
ENSMUSG00000001415	Smg5	3.55885	7.3962	2.07826
ENSMUSG00000001416	Cct3	3.5569	19.2155	5.40231
ENSMUSG00000001418	Glmp	14.4709	10.8074	0.746838
ENSMUSG00000001419	Mef2d	4.59564	10.8669	2.36461
ENSMUSG00000001424	Snd1	6.56812	18.4547	2.80974
ENSMUSG00000001436	Slc19a1	3.03977	14.1797	4.66473
ENSMUSG00000001440	Kpnb1	2.94714	38.5354	13.0755
ENSMUSG00000001441	Npepps	3.23988	23.8761	7.36943
ENSMUSG00000001467	Cyp51	13.4506	14.1184	1.04965
ENSMUSG00000001472	Tcf25	8.95228	13.6791	1.52801
ENSMUSG00000001473	Tubb6	8.25606	7.53403	0.912546
ENSMUSG00000001482	Def8	3.60684	12.2889	3.40712
ENSMUSG00000001507	Itga3	4.25047	37.8758	8.91096
ENSMUSG00000001518	Itfg2	2.28064	9.1647	4.01848
ENSMUSG00000001524	Gtf2h4	3.16179	17.6744	5.58998
ENSMUSG00000001525	Tubb5	3.42629	10.1984	2.97652
ENSMUSG00000001552	Jup	2.73294	11.398	4.1706
ENSMUSG00000001555	Fkbp10	16.7458	12.8331	0.76635
ENSMUSG00000001569	Nom1	2.94333	23.1439	7.86315
ENSMUSG00000001576	Ergic1	10.3932	13.1252	1.26287
ENSMUSG00000001588	Acap1	5.61671	8.741	1.55625
ENSMUSG00000001627	Ifrd1	4.29292	31.4044	7.31539
ENSMUSG00000001630	Stk38l	1.75574	10.2083	5.81422
ENSMUSG00000001632	Brpf1	3.55293	8.92283	2.5114
ENSMUSG00000001642	Akr1b3	6.07824	9.98826	1.64328
ENSMUSG00000001663	Gstt1	18.501	26.146	1.41322
ENSMUSG00000001665	Gstt3	5.13887	15.7286	3.06072
ENSMUSG00000001666	Ddt	13.2498	19.0221	1.43565
ENSMUSG00000001674	Ddx18	4.71026	46.4106	9.85309
ENSMUSG00000001687	Ubl3	8.08043	22.9554	2.84086
ENSMUSG00000001700	Gramd3	1.68044	13.3841	7.96466
ENSMUSG00000001729	Akt1	9.58861	12.1188	1.26388
ENSMUSG00000001741	Il16	3.78536	4.43569	1.1718
ENSMUSG00000001750	Tcirg1	4.89742	9.61928	1.96415
ENSMUSG00000001751	Naglu	12.15	43.0885	3.54639
ENSMUSG00000001761	Smo	5.90091	11.0796	1.87761
ENSMUSG00000001763	Tspan33	5.16346	10.3918	2.01257
ENSMUSG00000001767	Crnkl1	3.07448	17.3517	5.64378
ENSMUSG00000001768	Rin2	1.13129	7.58042	6.70069
ENSMUSG00000001783	Rtcb	7.26159	22.6372	3.11739
ENSMUSG00000001785	Pwp1	2.4843	14.3004	5.75633
ENSMUSG00000001786	Fbxo7	3.12618	12.5132	4.00272
ENSMUSG00000001794	Capns1	13.6254	9.54282	0.70037
ENSMUSG00000001802	Lrp3	7.69837	10.607	1.37783
ENSMUSG00000001829	Clpb	18.5858	19.9496	1.07338
ENSMUSG00000001833	2017-09-07	4.35391	12.3292	2.83175
ENSMUSG00000001844	Zdhhc4	10.3135	7.39484	0.717003
ENSMUSG00000001847	Rac1	5.73052	12.0127	2.09626
ENSMUSG00000001855	Nup214	1.84092	9.42538	5.11993
ENSMUSG00000001870	Ltbp1	9.08428	11.2901	1.24281
ENSMUSG00000001891	Ugp2	15.5202	28.1191	1.81177
ENSMUSG00000001909	Trmt1	17.6891	17.8907	1.0114
ENSMUSG00000001910	Nacc1	3.93846	14.3223	3.63652
ENSMUSG00000001911	Nfix	6.1357	22.1101	3.60352
ENSMUSG00000001918	Slc1a5	4.59527	6.91004	1.50373
ENSMUSG00000001924	Uba1	6.66756	25.4645	3.81916
ENSMUSG00000001930	Vwf	14.5402	9.22625	0.634534
ENSMUSG00000001943	Vsig2	2.77098	4.78086	1.72533
ENSMUSG00000001946	Esam	4.68726	6.11568	1.30474
ENSMUSG00000001962	Fam50a	3.99421	14.5507	3.64295
ENSMUSG00000001964	Emd	6.50721	11.7322	1.80296
ENSMUSG00000001995	Sipa1l2	0.986783	7.47994	7.58012
ENSMUSG00000001998	Ap4e1	2.68433	15.4482	5.75496
ENSMUSG00000001999	Blvra	3.99642	8.97927	2.24683
ENSMUSG00000002010	Idh3g	5.53263	11.1428	2.01402
ENSMUSG00000002014	Ssr4	24.4693	17.032	0.696056
ENSMUSG00000002028	Kmt2a	3.81167	16.4151	4.30653
ENSMUSG00000002031	Ift46	4.1169	13.4319	3.26262
ENSMUSG00000002033	Cd3g	7.88217	8.64999	1.09741
ENSMUSG00000002052	Supt6	3.81806	33.5155	8.77814
ENSMUSG00000002058	Unc119	7.40836	10.339	1.39559
ENSMUSG00000002059	Rab34	12.1747	12.663	1.04011
ENSMUSG00000002064	Sdf2	10.0628	16.7805	1.66757
ENSMUSG00000002102	Psmc3	4.86219	17.5505	3.60958
ENSMUSG00000002103	Acp2	4.33594	22.5937	5.21079
ENSMUSG00000002105	Slc39a13	4.17571	13.7125	3.28387
ENSMUSG00000002107	Celf2	3.66974	7.91945	2.15804
ENSMUSG00000002108	Nr1h3	3.52113	19.6621	5.58404
ENSMUSG00000002111	Spi1	3.06184	4.66103	1.5223
ENSMUSG00000002129	Sf3a1	2.17813	16.053	7.37011
ENSMUSG00000002147	Stat6	2.60067	14.7757	5.68152
ENSMUSG00000002205	Vrk3	2.87235	17.5369	6.10541
ENSMUSG00000002210	Smg9	1.97288	4.80337	2.4347
ENSMUSG00000002221	Paxip1	5.50678	32.4267	5.88851
ENSMUSG00000002222	Rmnd5a	5.45349	14.0893	2.58353
ENSMUSG00000002227	Mov10	3.35306	22.6262	6.74793
ENSMUSG00000002233	Rhoc	14.9473	29.2642	1.95783
ENSMUSG00000002249	Tead3	4.18358	9.436	2.25548
ENSMUSG00000002250	Ppard	1.40942	5.57977	3.95892
ENSMUSG00000002265	Peg3	3.21583	16.9131	5.25932
ENSMUSG00000002279	Lmf1	13.3327	24.2105	1.81587
ENSMUSG00000002280	Narfl	2.83032	16.3815	5.78785
ENSMUSG00000002307	Daxx	3.63487	17.2873	4.75596
ENSMUSG00000002308	Cd320	2.86925	29.1686	10.1659
ENSMUSG00000002319	Ipo4	10.1603	26.6817	2.62608
ENSMUSG00000002320	Tm9sf1	19.2366	19.6994	1.02406
ENSMUSG00000002324	Rec8	7.44923	9.37108	1.25799
ENSMUSG00000002325	Irf9	3.95911	22.8468	5.77069
ENSMUSG00000002326	Gmpr2	3.6324	9.21655	2.53731
ENSMUSG00000002329	Mdp1	8.16091	12.8107	1.56976
ENSMUSG00000002332	Dhrs1	7.3112	16.9303	2.31567
ENSMUSG00000002342	Tmem161a	7.3911	25.0768	3.39284
ENSMUSG00000002343	Armc6	2.46869	17.71	7.17385
ENSMUSG00000002345	2310045N01Rik	5.89602	7.35019	1.24663
ENSMUSG00000002365	Snx9	6.0874	15.4149	2.53226
ENSMUSG00000002372	Ranbp3	2.36415	13.1223	5.55054
ENSMUSG00000002379	Ndufa11	7.98072	9.17473	1.14961
ENSMUSG00000002395	Use1	12.1334	13.9848	1.15259
ENSMUSG00000002396	Ocel1	4.1724	40.709	9.75674
ENSMUSG00000002409	Dyrk1b	2.94123	14.4605	4.91646
ENSMUSG00000002413	Braf	2.44824	8.72901	3.56542
ENSMUSG00000002416	Ndufb2	18.0344	16.3818	0.908361
ENSMUSG00000002428	Hltf	4.21959	9.25565	2.19349
ENSMUSG00000002455	Prpf6	2.34999	22.2469	9.46677
ENSMUSG00000002458	Rgs19	3.13485	6.18449	1.97282
ENSMUSG00000002477	Snrpd1	2.10664	10.8189	5.13564
ENSMUSG00000002486	Tchp	3.59879	9.20948	2.55905
ENSMUSG00000002496	Tsc2	13.4049	16.2784	1.21437
ENSMUSG00000002504	Slc9a3r2	2.27317	8.7479	3.84833
ENSMUSG00000002524	Puf60	3.21988	31.3723	9.74332
ENSMUSG00000002546	Golga2	3.52902	19.1033	5.41321
ENSMUSG00000002550	Uck1	4.75834	24.5559	5.16061
ENSMUSG00000002603	Tgfb1	18.2025	19.166	1.05294
ENSMUSG00000002608	Ccdc97	4.46135	13.6378	3.05689
ENSMUSG00000002617	Zfp40	1.74141	6.46492	3.71247
ENSMUSG00000002625	Akap8l	4.14343	12.955	3.12665
ENSMUSG00000002635	Pdcd2l	3.00783	19.1139	6.35472
ENSMUSG00000002658	Gtf2f1	3.30821	14.7477	4.45791
ENSMUSG00000002660	Clpp	7.80534	13.3914	1.71567
ENSMUSG00000002661	Alkbh7	2.01158	33.8096	16.8075
ENSMUSG00000002668	Dennd1c	3.91292	9.66771	2.47072
ENSMUSG00000002679	Med6	2.96956	11.0436	3.71893
ENSMUSG00000002699	Lcp2	0.702609	2.70592	3.85125
ENSMUSG00000002718	Cse1l	3.20892	12.4003	3.86432
ENSMUSG00000002728	Naa20	4.24923	42.0974	9.90707
ENSMUSG00000002731	Prkra	6.13484	22.6925	3.69896
ENSMUSG00000002732	Fkbp7	23.9997	9.46533	0.394394
ENSMUSG00000002741	Ykt6	5.12431	11.6308	2.26974
ENSMUSG00000002748	Baz1b	2.30117	13.0077	5.65265
ENSMUSG00000002767	Mrpl2	8.55212	28.6351	3.3483
ENSMUSG00000002768	Mea1	9.09176	11.6451	1.28084
ENSMUSG00000002769	Gnmt	11.3322	12.3458	1.08944
ENSMUSG00000002778	Kdelr1	10.855	13.1671	1.213
ENSMUSG00000002781	Tmem143	2.8353	23.82	8.40124
ENSMUSG00000002803	Btbd6	2.26415	9.42626	4.16327
ENSMUSG00000002804	Nudt14	13.2245	19.4308	1.46931
ENSMUSG00000002812	Flii	6.7696	16.9745	2.50747
ENSMUSG00000002814	Top3a	2.58267	11.0165	4.26553
ENSMUSG00000002820	Atg4d	2.55618	16.0415	6.27558
ENSMUSG00000002825	Qtrt1	5.18153	8.3025	1.60233
ENSMUSG00000002831	Plin4	2.89218	11.7209	4.0526
ENSMUSG00000002833	Hdgfrp2	3.27698	16.0075	4.88484
ENSMUSG00000002835	Chaf1a	3.74816	9.31075	2.48409
ENSMUSG00000002844	Adprh	2.97783	11.1111	3.73127
ENSMUSG00000002845	Tmem39a	3.0427	9.29078	3.05346
ENSMUSG00000002847	Pla1a	38.8701	17.961	0.462079
ENSMUSG00000002870	Mcm2	4.41406	17.5902	3.98505
ENSMUSG00000002871	Tpra1	3.25932	14.6639	4.49908
ENSMUSG00000002885	Adgre5	4.04304	8.12171	2.00881
ENSMUSG00000002897	Il17ra	3.9816	13.0974	3.28948
ENSMUSG00000002908	Kcnn1	6.80289	25.3343	3.72405
ENSMUSG00000002910	Arrdc2	5.95618	20.7885	3.49024
ENSMUSG00000002944	Cd36	19.6218	19.4481	0.991148
ENSMUSG00000002948	Map2k7	3.91822	15.4267	3.93716
ENSMUSG00000002949	Timm44	5.29722	17.5336	3.30997
ENSMUSG00000002957	Ap2a2	2.76458	10.9041	3.9442
ENSMUSG00000002963	Pnkp	3.68016	14.9603	4.06514
ENSMUSG00000002968	Med25	9.71534	21.6535	2.2288
ENSMUSG00000002981	Clptm1	19.9108	31.0564	1.55977
ENSMUSG00000002992	Apoc2	15.7229	6.88206	0.437709
ENSMUSG00000002996	Hbp1	2.63976	15.857	6.00697
ENSMUSG00000003033	Ap1m1	2.59773	10.8196	4.16501
ENSMUSG00000003037	Rab8a	4.15396	17.5355	4.22138
ENSMUSG00000003039	Fam32a	5.50754	13.0165	2.3634
ENSMUSG00000003053	Cyp2c29	18.3567	23.6659	1.28922
ENSMUSG00000003062	Stard3nl	24.2148	13.8282	0.571063
ENSMUSG00000003072	Atp5d	21.984	13.7975	0.627615
ENSMUSG00000003099	Ppp5c	7.21644	33.5363	4.64721
ENSMUSG00000003123	Lipe	1.99312	24.6359	12.3604
ENSMUSG00000003131	Pafah1b2	3.76321	27.0141	7.17849
ENSMUSG00000003134	Tbc1d8	2.82389	12.3397	4.36977
ENSMUSG00000003135	Cnot11	5.9186	27.8399	4.7038
ENSMUSG00000003154	Foxj2	7.26588	14.9804	2.06175
ENSMUSG00000003161	Sri	7.01151	23.9198	3.41151
ENSMUSG00000003166	Dgcr2	2.08778	11.1233	5.32779
ENSMUSG00000003184	Irf3	3.38739	26.8289	7.92023
ENSMUSG00000003190	Bcl2l12	5.37638	42.6635	7.93535
ENSMUSG00000003198	Zfp959	5.95568	12.1265	2.03612
ENSMUSG00000003199	Mpnd	11.4625	17.7968	1.55261
ENSMUSG00000003200	Sh3gl1	3.49009	19.2898	5.52701
ENSMUSG00000003206	Ebi3	5.95058	29.7677	5.00249
ENSMUSG00000003208	Ccdc94	2.04904	7.17993	3.50404
ENSMUSG00000003226	Ranbp2	2.53289	11.6805	4.61155
ENSMUSG00000003234	Abcf3	2.73551	15.6578	5.72391
ENSMUSG00000003235	Eif2b5	5.07391	15.4084	3.03678
ENSMUSG00000003269	Cyth2	7.94379	48.9498	6.16203
ENSMUSG00000003283	Hck	1.79299	4.9339	2.75177
ENSMUSG00000003299	Mrpl4	3.92145	9.41915	2.40196
ENSMUSG00000003308	Keap1	3.85998	27.6426	7.16132
ENSMUSG00000003316	Glg1	7.58369	13.3291	1.75759
ENSMUSG00000003344	Btbd2	4.26897	18.8649	4.41908
ENSMUSG00000003345	Csnk1g2	15.0328	14.6482	0.974414
ENSMUSG00000003348	Mob3a	4.57838	9.44771	2.06355
ENSMUSG00000003355	Fkbp11	7.6312	8.48814	1.1123
ENSMUSG00000003360	Ddx23	7.41878	25.2894	3.40884
ENSMUSG00000003363	Pld3	7.70162	24.9929	3.24515
ENSMUSG00000003378	Grik5	11.4181	11.0704	0.969551
ENSMUSG00000003380	Rabac1	14.6599	21.3168	1.45408
ENSMUSG00000003402	Prkcsh	22.6764	33.2961	1.46832
ENSMUSG00000003420	Fcgrt	9.24753	44.7786	4.84222
ENSMUSG00000003421	Nosip	2.70822	11.2756	4.16347
ENSMUSG00000003423	Pih1d1	5.8683	22.2703	3.79502
ENSMUSG00000003429	Rps11	35.1014	14.2863	0.407
ENSMUSG00000003435	Supt5	4.50684	15.7121	3.48627
ENSMUSG00000003437	Paf1	3.82944	14.2441	3.71963
ENSMUSG00000003438	Timm50	8.10743	13.956	1.72138
ENSMUSG00000003444	Med29	4.05328	9.31741	2.29873
ENSMUSG00000003458	Ncstn	40.2372	16.1967	0.402531
ENSMUSG00000003464	Pex19	6.24008	24.4793	3.92291
ENSMUSG00000003500	Impdh1	6.42752	29.8897	4.65027
ENSMUSG00000003518	Dusp3	6.50871	24.2817	3.73065
ENSMUSG00000003526	Prodh	5.73321	20.9658	3.65691
ENSMUSG00000003527	Dgcr14	2.45606	12.863	5.23725
ENSMUSG00000003528	Slc25a1	8.95683	16.5968	1.85298
ENSMUSG00000003531	Dgcr6	38.1103	12.8894	0.338213
ENSMUSG00000003546	Klc4	3.63127	28.3895	7.81807
ENSMUSG00000003549	Ercc1	3.46122	15.0852	4.35834
ENSMUSG00000003555	Cyp17a1	3.85105	10.7605	2.79417
ENSMUSG00000003559	As3mt	5.29051	21.0942	3.98717
ENSMUSG00000003573	Homer3	4.33329	11.9777	2.76411
ENSMUSG00000003575	Crtc1	2.15918	15.8118	7.32308
ENSMUSG00000003581	Rnf215	7.58806	19.6867	2.59443
ENSMUSG00000003585	Sec14l2	4.81581	35.1897	7.30712
ENSMUSG00000003604	Aven	4.03152	14.0309	3.48029
ENSMUSG00000003617	Cp	15.3535	21.3882	1.39304
ENSMUSG00000003644	Rps6ka1	3.05313	13.9263	4.5613
ENSMUSG00000003660	Snrnp200	5.09013	19.3743	3.80625
ENSMUSG00000003662	Ciao1	4.07781	16.121	3.95336
ENSMUSG00000003680	Taf6l	5.09489	9.05458	1.77719
ENSMUSG00000003731	Kpna6	2.81514	23.3204	8.28393
ENSMUSG00000003762	Adck4	7.61785	18.7225	2.45771
ENSMUSG00000003778	Brd8	2.06248	14.839	7.19471
ENSMUSG00000003808	Farsa	3.69575	37.4012	10.1201
ENSMUSG00000003810	Mast2	2.122	6.85337	3.22967
ENSMUSG00000003812	Dnase2a	5.71764	9.89034	1.72979
ENSMUSG00000003814	Calr	22.0173	21.7557	0.988119
ENSMUSG00000003824	Syce2	3.50545	11.0069	3.13995
ENSMUSG00000003847	Nfat5	2.88087	14.8288	5.14735
ENSMUSG00000003848	Nob1	2.69419	14.8661	5.51782
ENSMUSG00000003849	Nqo1	10.6931	25.2398	2.36039
ENSMUSG00000003865	Gys1	2.20659	15.0513	6.82109
ENSMUSG00000003868	Ruvbl2	2.28695	14.5326	6.35456
ENSMUSG00000003873	Bax	28.6285	17.3122	0.60472
ENSMUSG00000003923	Tfam	3.01198	22.2074	7.37303
ENSMUSG00000003929	Zfp81	3.25693	7.44671	2.28642
ENSMUSG00000003955	Fam162a	7.51961	26.7467	3.55693
ENSMUSG00000003970	Rpl8	38.4896	13.7151	0.356332
ENSMUSG00000003992	Ssbp2	4.32453	10.2216	2.36364
ENSMUSG00000004018	Fancl	2.40874	17.647	7.32622
ENSMUSG00000004032	Gstm5	22.2634	10.4033	0.467284
ENSMUSG00000004035	Gstm7	10.0144	22.2822	2.22502
ENSMUSG00000004040	Stat3	2.887	17.3255	6.00122
ENSMUSG00000004043	Stat5a	3.06733	17.5086	5.7081
ENSMUSG00000004044	Ptrf	6.78551	11.3885	1.67836
ENSMUSG00000004054	Map3k11	6.05114	40.3996	6.67636
ENSMUSG00000004056	Akt2	7.90293	19.5069	2.46832
ENSMUSG00000004070	Hmox2	3.67423	15.835	4.30975
ENSMUSG00000004071	Cdip1	3.20549	11.931	3.72207
ENSMUSG00000004085	Zak	2.76038	17.9079	6.48749
ENSMUSG00000004096	Cwc15	6.10677	10.5756	1.73178
ENSMUSG00000004099	Dnmt1	2.27775	15.4934	6.80208
ENSMUSG00000004100	Ppan	11.3158	42.9747	3.79775
ENSMUSG00000004105	Angptl2	15.0041	15.2439	1.01598
ENSMUSG00000004187	Kifc2	3.83594	9.27381	2.41761
ENSMUSG00000004207	Psap	38.5623	46.2992	1.20063
ENSMUSG00000004221	Ikbkg	3.42411	21.0758	6.1551
ENSMUSG00000004233	Wars2	5.61196	26.8566	4.78559
ENSMUSG00000004263	Atn1	3.94842	15.7722	3.99455
ENSMUSG00000004264	Phb2	9.09017	29.716	3.26903
ENSMUSG00000004266	Ptpn6	3.14479	12.7284	4.04747
ENSMUSG00000004268	Emg1	6.97706	13.3984	1.92035
ENSMUSG00000004270	Lpcat3	2.17177	20.2185	9.30971
ENSMUSG00000004285	Atp6v1f	12.7552	13.8097	1.08267
ENSMUSG00000004317	Clcn5	3.92779	27.9565	7.11763
ENSMUSG00000004319	Clcn3	5.03793	49.6264	9.85057
ENSMUSG00000004359	Spic	1.87586	7.58043	4.04103
ENSMUSG00000004364	Cul3	2.3257	10.607	4.56076
ENSMUSG00000004383	Large	1.69108	13.4173	7.93416
ENSMUSG00000004393	Ddx56	2.63888	15.3409	5.81343
ENSMUSG00000004394	Tmed4	43.8114	15.8688	0.362206
ENSMUSG00000004446	Bid	2.47659	21.35	8.6207
ENSMUSG00000004451	Ralb	2.92821	12.087	4.12779
ENSMUSG00000004455	Ppp1cc	4.62159	48.0875	10.405
ENSMUSG00000004460	Dnajb11	18.3305	25.2527	1.37764
ENSMUSG00000004462	Tbccd1	2.1755	10.0724	4.6299
ENSMUSG00000004500	Zfp324	3.16686	7.38385	2.3316
ENSMUSG00000004508	Gab2	1.5658	4.916	3.13962
ENSMUSG00000004530	Coro1c	2.6063	7.12381	2.7333
ENSMUSG00000004535	Tax1bp1	2.31976	9.49119	4.09145
ENSMUSG00000004558	Ndrg2	13.9201	26.5671	1.90855
ENSMUSG00000004561	Mettl17	2.67406	15.734	5.88394
ENSMUSG00000004565	Pnpla6	3.17797	15.7801	4.96548
ENSMUSG00000004568	Arhgef18	1.92827	32.6149	16.9141
ENSMUSG00000004591	Pkn2	2.54321	17.5503	6.90085
ENSMUSG00000004610	Etfb	7.55343	16.5138	2.18626
ENSMUSG00000004612	Nkg7	6.84925	6.35455	0.927772
ENSMUSG00000004626	Stxbp2	6.01305	13.1441	2.18593
ENSMUSG00000004637	Wwox	17.2745	11.7495	0.680166
ENSMUSG00000004655	Aqp1	16.3763	12.5402	0.765751
ENSMUSG00000004661	Arid3b	2.91892	9.99782	3.42518
ENSMUSG00000004665	Cnn2	7.78767	7.41932	0.952701
ENSMUSG00000004667	Polr2e	6.05371	16.2175	2.67893
ENSMUSG00000004677	Myo9b	2.86062	11.376	3.97676
ENSMUSG00000004698	Hdac9	1.48406	6.0632	4.08555
ENSMUSG00000004707	Ly9	4.21799	17.3331	4.10933
ENSMUSG00000004748	Mtfp1	3.93715	17.6972	4.49492
ENSMUSG00000004771	Rab11a	5.33927	9.18075	1.71948
ENSMUSG00000004788	Eif2b2	4.4809	9.26406	2.06745
ENSMUSG00000004789	Dlst	7.81887	23.0533	2.94842
ENSMUSG00000004798	Ulk2	7.64215	11.5581	1.51241
ENSMUSG00000004814	Ccl24	4.08284	5.40433	1.32367
ENSMUSG00000004815	Dgkq	2.61595	14.2301	5.43973
ENSMUSG00000004837	Grap	2.57451	4.04341	1.57056
ENSMUSG00000004843	Chmp2b	5.44728	14.2259	2.61156
ENSMUSG00000004846	Plod3	16.474	43.3354	2.63054
ENSMUSG00000004849	Ap1s1	38.5834	15.5637	0.403378
ENSMUSG00000004865	Srpk1	3.18557	31.4847	9.88355
ENSMUSG00000004880	Lbr	4.27493	18.3434	4.29092
ENSMUSG00000004895	Prcc	3.30876	20.8955	6.31522
ENSMUSG00000004896	Rrnad1	6.90621	23.6274	3.42118
ENSMUSG00000004897	Hdgf	4.77565	45.9115	9.61366
ENSMUSG00000004929	Thop1	5.03561	13.114	2.60424
ENSMUSG00000004931	Apba3	4.58609	29.3499	6.39978
ENSMUSG00000004936	Map2k1	4.05157	22.4147	5.53235
ENSMUSG00000004937	Sgta	3.78618	12.8164	3.38505
ENSMUSG00000004947	Dtx2	3.78469	14.5146	3.83507
ENSMUSG00000004952	Rasa4	4.22224	7.38769	1.74971
ENSMUSG00000004994	Ccdc130	7.61306	13.39	1.75882
ENSMUSG00000004996	Mri1	7.36154	36.6147	4.97378
ENSMUSG00000005034	Prkacb	5.66824	12.1398	2.14172
ENSMUSG00000005043	Sgsh	2.14394	6.17137	2.87852
ENSMUSG00000005057	Sh2b2	4.08116	7.78379	1.90725
ENSMUSG00000005069	Pex5	5.31045	31.1238	5.86086
ENSMUSG00000005087	Cd44	5.2143	14.3927	2.76023
ENSMUSG00000005102	Eif2ak4	3.69653	23.3061	6.30485
ENSMUSG00000005103	Wdr1	8.74936	10.0301	1.14638
ENSMUSG00000005125	Ndrg1	2.44908	17.2952	7.06189
ENSMUSG00000005150	Wdr83	9.51662	18.6922	1.96416
ENSMUSG00000005161	Prdx2	21.706	13.7553	0.633709
ENSMUSG00000005204	Senp3	10.4322	33.4645	3.20781
ENSMUSG00000005233	Spc25	16.0166	35.081	2.19029
ENSMUSG00000005251	Ripk4	9.60094	9.48501	0.987925
ENSMUSG00000005262	Ufd1l	6.30896	12.365	1.95991
ENSMUSG00000005299	Letm1	11.7799	16.9439	1.43837
ENSMUSG00000005354	Txn2	12.3403	21.3805	1.73257
ENSMUSG00000005362	Crbn	4.05656	13.5073	3.32973
ENSMUSG00000005370	Msh6	2.43563	19.7992	8.12901
ENSMUSG00000005371	Fbxo11	2.42515	14.1038	5.81566
ENSMUSG00000005373	Mlxipl	2.83169	9.37777	3.31172
ENSMUSG00000005374	Tbl2	4.89462	19.4747	3.9788
ENSMUSG00000005378	Wbscr22	5.15418	28.8971	5.60653
ENSMUSG00000005410	Mcm5	2.96076	14.1936	4.79391
ENSMUSG00000005413	Hmox1	2.42947	3.89515	1.60329
ENSMUSG00000005417	Mprip	8.21101	13.0153	1.5851
ENSMUSG00000005442	Cic	5.23641	18.6342	3.55859
ENSMUSG00000005447	Pafah1b3	7.12503	11.9509	1.67731
ENSMUSG00000005465	Il27ra	35.2243	42.6376	1.21046
ENSMUSG00000005469	Prkaca	5.0304	18.9248	3.76209
ENSMUSG00000005470	Asf1b	3.44581	6.5353	1.89659
ENSMUSG00000005481	Ddx39	5.00999	17.297	3.4525
ENSMUSG00000005493	Msh4	1.13702	2.09998	1.84691
ENSMUSG00000005501	Usp40	2.26188	22.3667	9.88854
ENSMUSG00000005505	Kbtbd4	5.0131	17.7644	3.5436
ENSMUSG00000005506	Celf1	2.68769	33.7826	12.5694
ENSMUSG00000005510	Ndufs3	12.1208	11.4707	0.946364
ENSMUSG00000005514	Por	6.11093	16.9047	2.76631
ENSMUSG00000005533	Igf1r	4.71884	7.23851	1.53396
ENSMUSG00000005534	Insr	3.1508	34.9722	11.0995
ENSMUSG00000005566	Trim28	6.22463	18.9853	3.05003
ENSMUSG00000005580	Adcy9	2.0937	17.1082	8.17129
ENSMUSG00000005583	Mef2c	3.11341	8.21601	2.63891
ENSMUSG00000005609	Ctr9	3.3974	32.3325	9.51684
ENSMUSG00000005611	Mrvi1	2.86066	5.89079	2.05925
ENSMUSG00000005615	Pcyt1a	3.17334	15.4005	4.85307
ENSMUSG00000005621	Zfp592	2.36402	7.90909	3.34561
ENSMUSG00000005625	Psmd4	4.97034	20.4384	4.11208
ENSMUSG00000005656	Snx6	2.85509	12.2004	4.2732
ENSMUSG00000005672	Kit	2.53186	4.91966	1.9431
ENSMUSG00000005674	Tomm40l	3.53861	9.87639	2.79104
ENSMUSG00000005677	Nr1i3	3.39628	9.24269	2.72141
ENSMUSG00000005681	Apoa2	12.7182	10.6327	0.836023
ENSMUSG00000005682	Pan2	4.71966	10.9383	2.3176
ENSMUSG00000005683	Cs	5.02868	10.9599	2.17949
ENSMUSG00000005686	Ampd3	3.06397	6.2022	2.02424
ENSMUSG00000005687	Bcas2	9.75466	26.5417	2.72092
ENSMUSG00000005698	Ctcf	3.00768	23.0832	7.67473
ENSMUSG00000005699	Pard6a	2.61089	13.2112	5.06002
ENSMUSG00000005718	Tfap4	2.57241	17.3246	6.73477
ENSMUSG00000005732	Ranbp1	9.56422	38.9088	4.06816
ENSMUSG00000005763	Cd247	3.16234	22.3577	7.06999
ENSMUSG00000005779	Psmb4	5.9575	27.1799	4.5623
ENSMUSG00000005803	Sqrdl	9.77086	23.2512	2.37964
ENSMUSG00000005813	Metap1	3.88766	27.4213	7.05343
ENSMUSG00000005823	Gpr108	11.4638	16.151	1.40886
ENSMUSG00000005836	Gata6	2.86983	38.4513	13.3984
ENSMUSG00000005846	Rsl1d1	3.94218	20.8611	5.29178
ENSMUSG00000005871	Apc	2.55077	8.66856	3.39841
ENSMUSG00000005873	Reep5	18.4153	11.9684	0.649916
ENSMUSG00000005881	Ergic3	43.3017	20.4591	0.472479
ENSMUSG00000005882	Uqcc1	6.97551	19.2824	2.76429
ENSMUSG00000005886	Ncoa2	1.40152	19.399	13.8415
ENSMUSG00000005893	Nr2c2	2.88595	16.9986	5.8901
ENSMUSG00000005897	Nr2c1	3.02976	37.4774	12.3698
ENSMUSG00000005899	Smpd4	2.95155	9.89443	3.35228
ENSMUSG00000005936	Kctd20	4.11007	23.6198	5.74681
ENSMUSG00000005949	Ctns	9.03511	12.7551	1.41173
ENSMUSG00000005951	Shpk	7.53845	45.0944	5.98192
ENSMUSG00000005968	Tuft1	4.02859	9.82725	2.43938
ENSMUSG00000005973	Rcn1	21.8288	29.1684	1.33623
ENSMUSG00000005980	Dnase1	10.3659	5.81218	0.560705
ENSMUSG00000005982	Naa60	5.77583	8.56552	1.48299
ENSMUSG00000006005	Tpr	1.80784	9.52121	5.26662
ENSMUSG00000006010	BC003331	12.0934	11.4305	0.945186
ENSMUSG00000006014	Prg4	14.953	13.9902	0.93561
ENSMUSG00000006019	Dhx34	3.10682	11.3523	3.65398
ENSMUSG00000006021	Kptn	5.40451	14.4177	2.66772
ENSMUSG00000006024	Napa	7.66241	10.6713	1.39268
ENSMUSG00000006057	Atp5g1	9.18199	9.75281	1.06217
ENSMUSG00000006058	Snf8	14.537	11.405	0.78455
ENSMUSG00000006095	Tbcb	4.89321	13.7499	2.81
ENSMUSG00000006127	Inpp5k	3.21585	7.36283	2.28954
ENSMUSG00000006154	Eps8l1	4.17969	13.9263	3.33189
ENSMUSG00000006169	Clint1	2.20464	14.5292	6.59029
ENSMUSG00000006191	Cdkal1	1.08174	12.7305	11.7686
ENSMUSG00000006215	Zbtb17	2.96587	12.5671	4.23725
ENSMUSG00000006218	Fam131c	2.81417	18.9839	6.74583
ENSMUSG00000006219	Fblim1	4.7055	8.55471	1.81802
ENSMUSG00000006235	Epor	3.7326	13.081	3.50453
ENSMUSG00000006241	Ccdc159	4.42581	34.4201	7.77712
ENSMUSG00000006273	Atp6v1b2	4.18	18.1889	4.35142
ENSMUSG00000006276	Eps15l1	2.42435	16.0483	6.61963
ENSMUSG00000006281	Tep1	7.20608	22.3734	3.1048
ENSMUSG00000006288	Ttc5	4.00153	16.0856	4.01986
ENSMUSG00000006289	Osgep	17.0329	20.1434	1.18262
ENSMUSG00000006299	Aamp	6.42264	23.0685	3.59174
ENSMUSG00000006301	Tmbim1	8.28374	14.5553	1.7571
ENSMUSG00000006304	Arpc2	8.89845	10.1668	1.14254
ENSMUSG00000006307	Kmt2b	5.32308	15.5694	2.92489
ENSMUSG00000006310	Zbtb32	6.75392	4.57683	0.677654
ENSMUSG00000006315	Tmem147	4.55879	9.95811	2.18438
ENSMUSG00000006333	Rps9	40.9437	20.1098	0.491158
ENSMUSG00000006335	Tfpt	2.42309	16.2515	6.70693
ENSMUSG00000006344	Ggt5	7.76306	13.712	1.76631
ENSMUSG00000006356	Crip2	3.37093	15.689	4.6542
ENSMUSG00000006360	Crip1	5.21044	3.20556	0.615218
ENSMUSG00000006362	Cbfa2t3	1.62573	19.1804	11.798
ENSMUSG00000006378	Gcat	13.5029	24.0991	1.78473
ENSMUSG00000006386	Tek	2.74276	6.35031	2.31529
ENSMUSG00000006390	Elovl1	2.85843	11.756	4.11275
ENSMUSG00000006392	Med8	2.34025	13.9936	5.97952
ENSMUSG00000006418	Rnf114	4.45513	10.3708	2.32784
ENSMUSG00000006442	Srm	4.35828	15.2075	3.48933
ENSMUSG00000006463	Zdhhc24	9.52788	30.8856	3.2416
ENSMUSG00000006464	Bbs1	4.67253	12.8893	2.75853
ENSMUSG00000006471	Ndor1	6.16907	10.2881	1.66769
ENSMUSG00000006476	Nsmf	6.24993	13.5109	2.16177
ENSMUSG00000006494	Pdk1	31.9274	21.9959	0.688934
ENSMUSG00000006498	Ptbp1	5.25007	28.7322	5.47274
ENSMUSG00000006517	Mvd	1.89392	9.03951	4.7729
ENSMUSG00000006519	Cyba	5.95088	11.4923	1.93119
ENSMUSG00000006526	Tmem110	4.56017	9.66192	2.11876
ENSMUSG00000006527	Sfmbt1	2.31075	17.8787	7.73716
ENSMUSG00000006567	Atp7b	5.44027	25.5195	4.69085
ENSMUSG00000006575	Rundc3a	15.0294	15.3781	1.0232
ENSMUSG00000006585	Cdt1	4.1823	10.7909	2.58013
ENSMUSG00000006587	Snai3	4.18654	6.09915	1.45685
ENSMUSG00000006589	Aprt	11.2045	11.2626	1.00519
ENSMUSG00000006599	Gtf2h1	5.82477	16.0874	2.76189
ENSMUSG00000006611	Hfe	12.1336	16.8928	1.39223
ENSMUSG00000006641	Slc5a6	5.79089	12.0938	2.08842
ENSMUSG00000006673	Qrich1	3.31708	18.4159	5.55185
ENSMUSG00000006676	Usp19	6.9423	46.8511	6.74865
ENSMUSG00000006678	Pola1	4.45762	5.75763	1.29164
ENSMUSG00000006699	Cdc42	7.08446	13.7648	1.94295
ENSMUSG00000006705	Pknox1	3.06789	26.0247	8.48295
ENSMUSG00000006715	Gmnn	2.2592	19.2274	8.51074
ENSMUSG00000006717	Acot13	6.04469	7.65971	1.26718
ENSMUSG00000006728	Cdk4	3.74296	16.2177	4.33286
ENSMUSG00000006731	B4galnt1	4.22025	10.8865	2.57959
ENSMUSG00000006732	Mettl1	3.69458	17.2414	4.66669
ENSMUSG00000006740	Kif5b	2.98448	23.69	7.93773
ENSMUSG00000006763	Saal1	6.8304	21.9964	3.22037
ENSMUSG00000006782	Cnp	6.45568	22.0881	3.4215
ENSMUSG00000006906	Stambp	3.04723	12.1044	3.97226
ENSMUSG00000006920	Ezh1	2.67359	18.6459	6.97411
ENSMUSG00000006930	Hap1	3.54891	9.12698	2.57177
ENSMUSG00000006932	Ctnnb1	3.34375	19.4832	5.82676
ENSMUSG00000006941	Eif1b	6.50373	12.4768	1.9184
ENSMUSG00000006958	Chrd	10.3035	49.4941	4.80361
ENSMUSG00000006998	Psmd2	7.52259	33.9757	4.51649
ENSMUSG00000007029	Vars	6.90614	29.4236	4.2605
ENSMUSG00000007036	Abhd16a	20.2018	15.4428	0.764428
ENSMUSG00000007038	Neu1	10.0813	9.99251	0.991192
ENSMUSG00000007039	Ddah2	3.57125	5.98519	1.67594
ENSMUSG00000007041	Clic1	5.16824	16.6947	3.23025
ENSMUSG00000007050	Lsm2	3.70976	12.4922	3.3674
ENSMUSG00000007216	Zfp775	18.6586	8.48416	0.454704
ENSMUSG00000007338	Mrpl49	8.70655	11.7116	1.34515
ENSMUSG00000007411	Mark3	2.87344	15.5751	5.42038
ENSMUSG00000007458	M6pr	11.2832	15.5938	1.38203
ENSMUSG00000007476	Lrrc8a	2.75857	18.584	6.73681
ENSMUSG00000007564	Ppp2r1a	3.90387	11.0012	2.81803
ENSMUSG00000007570	Fance	5.68963	13.6753	2.40356
ENSMUSG00000007589	Tinf2	3.2662	19.5973	6.00005
ENSMUSG00000007594	Hapln4	8.78174	17.5527	1.99878
ENSMUSG00000007603	Dus3l	5.08543	16.4382	3.23241
ENSMUSG00000007610	Gtpbp3	4.87813	17.3976	3.56644
ENSMUSG00000007613	Tgfbr1	2.91391	15.5082	5.32212
ENSMUSG00000007655	Cav1	3.72002	6.51391	1.75104
ENSMUSG00000007656	Arpp19	6.92312	10.2601	1.482
ENSMUSG00000007659	Bcl2l1	2.53526	7.33743	2.89415
ENSMUSG00000007721	Ccdc124	27.2761	16.4265	0.602231
ENSMUSG00000007739	Cct4	8.31389	22.3111	2.6836
ENSMUSG00000007812	Zfp655	3.06284	16.0307	5.23391
ENSMUSG00000007815	Rhoa	6.20478	16.5931	2.67425
ENSMUSG00000007817	Zmiz1	0.752966	11.8427	15.728
ENSMUSG00000007827	Ankrd26	1.83834	14.6204	7.95302
ENSMUSG00000007833	Aldh16a1	6.13221	13.8149	2.25285
ENSMUSG00000007837	Prrg2	5.45145	14.2075	2.60618
ENSMUSG00000007867	Ift43	4.09539	12.5805	3.07188
ENSMUSG00000007872	Id3	3.83927	5.81209	1.51385
ENSMUSG00000007891	Ctsd	36.4166	35.4429	0.973262
ENSMUSG00000007892	Rplp1	18.9445	7.86954	0.415399
ENSMUSG00000007950	Abhd8	7.21626	11.9258	1.65263
ENSMUSG00000007987	Ift22	7.67936	13.6902	1.78272
ENSMUSG00000008035	Mid1ip1	2.72226	12.7254	4.67456
ENSMUSG00000008036	Ap2s1	7.44502	8.3	1.11484
ENSMUSG00000008140	Emc10	23.5347	18.6294	0.791572
ENSMUSG00000008153	Clstn3	2.19964	20.9833	9.53944
ENSMUSG00000008167	Fbxw9	5.78452	11.848	2.04822
ENSMUSG00000008200	Fnbp4	7.28589	12.0277	1.65082
ENSMUSG00000008206	Cers4	3.81961	5.1993	1.36121
ENSMUSG00000008226	Scrn3	6.90447	16.1651	2.34126
ENSMUSG00000008301	Phax	4.44569	16.6912	3.75446
ENSMUSG00000008307	1700109H08Rik	7.46705	25.1559	3.36891
ENSMUSG00000008333	Snrpb2	7.3739	17.0789	2.31613
ENSMUSG00000008348	Ubc	2.82444	6.39631	2.26463
ENSMUSG00000008373	Prpf31	2.48071	12.7531	5.14091
ENSMUSG00000008398	Elk3	1.95727	7.11451	3.63491
ENSMUSG00000008435	Rdh13	4.25862	17.2504	4.05071
ENSMUSG00000008450	Nutf2	8.05528	15.7015	1.94921
ENSMUSG00000008475	Arpc5	43.6694	18.3921	0.421168
ENSMUSG00000008496	Pou2f2	2.85323	7.93311	2.78039
ENSMUSG00000008540	Mgst1	13.9381	21.9601	1.57555
ENSMUSG00000008575	Nfib	2.79246	12.751	4.5662
ENSMUSG00000008604	Ubqln4	3.80952	23.9837	6.29571
ENSMUSG00000008668	Rps18	4.91992	3.69226	0.750472
ENSMUSG00000008683	Rps15a	9.81485	5.41761	0.551981
ENSMUSG00000008690	Ncaph2	5.34754	18.045	3.37445
ENSMUSG00000008730	Hipk1	3.98409	30.6459	7.69206
ENSMUSG00000008822	Acyp1	5.12364	34.66	6.76471
ENSMUSG00000008845	Cd163	2.96942	9.96971	3.35746
ENSMUSG00000008855	Hdac5	3.57115	12.4776	3.49399
ENSMUSG00000008859	Rala	7.65904	9.55613	1.24769
ENSMUSG00000008958	Vps72	4.57593	14.712	3.21509
ENSMUSG00000008976	Gabpa	3.65559	21.0452	5.75698
ENSMUSG00000008999	Bmp7	6.29887	10.5364	1.67274
ENSMUSG00000009013	Dynll1	23.5551	34.4653	1.46318
ENSMUSG00000009030	Pdcl	3.05321	36.2566	11.8749
ENSMUSG00000009035	Tmem184b	4.4746	9.54312	2.13273
ENSMUSG00000009073	Nf2	3.25001	16.7278	5.147
ENSMUSG00000009075	Cabp7	4.07597	15.1013	3.70497
ENSMUSG00000009076	Zmat5	4.43649	11.6029	2.61534
ENSMUSG00000009079	Ewsr1	4.27629	12.3192	2.88081
ENSMUSG00000009090	Ap1b1	2.89747	11.2346	3.87736
ENSMUSG00000009112	Bcl2l13	3.16749	33.2272	10.4901
ENSMUSG00000009207	Lnp	5.7673	27.7036	4.80357
ENSMUSG00000009291	Pttg1ip	10.7487	22.5686	2.09965
ENSMUSG00000009292	Trpm2	2.752	10.8097	3.92794
ENSMUSG00000009293	Ube2g2	4.52283	16.939	3.74523
ENSMUSG00000009406	Elk1	9.86238	28.1384	2.85311
ENSMUSG00000009418	Nav1	1.62579	6.88113	4.23249
ENSMUSG00000009470	Tnpo1	9.65359	18.7729	1.94465
ENSMUSG00000009545	Kcnq1	2.54338	4.55498	1.79092
ENSMUSG00000009555	Cdk9	5.44875	27.2027	4.99247
ENSMUSG00000009563	Tor2a	9.55933	10.4277	1.09084
ENSMUSG00000009566	Fpgs	2.55103	31.8284	12.4767
ENSMUSG00000009569	Mkl2	1.56527	30.5108	19.4923
ENSMUSG00000009585	Apobec3	6.48797	22.7153	3.50115
ENSMUSG00000009621	Vav2	2.04783	10.6807	5.21561
ENSMUSG00000009630	Ppp2cb	4.78538	31.1828	6.51627
ENSMUSG00000009633	G0s2	0.685229	3.2135	4.68968
ENSMUSG00000009640	Dmap1	2.35787	22.8904	9.70807
ENSMUSG00000009646	Pla2g12b	6.21335	12.7387	2.05021
ENSMUSG00000009647	Mcu	2.60055	17.8873	6.87828
ENSMUSG00000009654	Oit3	5.1648	11.6631	2.25818
ENSMUSG00000009681	Bcr	2.10873	16.3351	7.74641
ENSMUSG00000009687	Fxyd5	18.5183	5.97995	0.322921
ENSMUSG00000009739	Pou6f1	7.55113	6.28815	0.832742
ENSMUSG00000009741	Ubp1	6.85834	12.5007	1.8227
ENSMUSG00000009772	Nuak2	3.37791	4.90305	1.4515
ENSMUSG00000009828	Ick	2.56982	11.9563	4.65258
ENSMUSG00000009863	Sdhb	13.383	12.7776	0.95476
ENSMUSG00000009894	Snap47	3.35378	15.7908	4.70835
ENSMUSG00000009905	Kdsr	21.453	30.5475	1.42393
ENSMUSG00000009907	Vps4b	4.5629	13.9165	3.04994
ENSMUSG00000009927	Rps25	19.3582	10.2832	0.531203
ENSMUSG00000009995	Taz	4.69579	18.5816	3.95707
ENSMUSG00000010045	Tmem115	4.54626	15.8384	3.48382
ENSMUSG00000010047	Hyal2	3.60949	35.731	9.89919
ENSMUSG00000010054	Tusc2	8.72922	25.3673	2.90603
ENSMUSG00000010057	Nprl2	3.87525	22.7172	5.86212
ENSMUSG00000010064	Slc38a3	17.1507	44.8637	2.61585
ENSMUSG00000010095	Slc3a2	4.70722	9.60614	2.04072
ENSMUSG00000010097	Nxf1	7.85766	18.5114	2.35584
ENSMUSG00000010110	Stx5a	3.56631	12.9771	3.63879
ENSMUSG00000010205	Raver1	4.05321	21.5425	5.31492
ENSMUSG00000010277	2610507B11Rik	7.77156	28.1217	3.61854
ENSMUSG00000010307	Tmem86a	3.15651	13.9752	4.42742
ENSMUSG00000010358	Ifi35	2.40981	8.77549	3.64157
ENSMUSG00000010362	Rdm1	17.2901	16.0397	0.927682
ENSMUSG00000010392	Gosr1	3.17617	18.645	5.87027
ENSMUSG00000010406	Mrpl52	8.8617	9.42885	1.064
ENSMUSG00000010453	Kansl3	3.83466	9.11915	2.37808
ENSMUSG00000010517	Faf1	2.08022	16.3862	7.87714
ENSMUSG00000010538	Tsacc	3.87452	7.33113	1.89214
ENSMUSG00000010601	Apol7a	3.81019	13.3484	3.50333
ENSMUSG00000010607	Pigyl	4.02051	16.4258	4.08549
ENSMUSG00000010608	Rbm25	2.97558	14.8031	4.97487
ENSMUSG00000010609	Psen2	2.25994	16.2303	7.18172
ENSMUSG00000010663	Fads1	19.8484	15.5243	0.782145
ENSMUSG00000010721	Lmbr1	3.03263	16.5959	5.47243
ENSMUSG00000010751	Tnfrsf22	2.41851	11.8451	4.89771
ENSMUSG00000010755	Cars	2.08869	16.7835	8.03545
ENSMUSG00000010797	Wnt2	1.89338	5.40615	2.8553
ENSMUSG00000010911	Apip	4.33992	13.6466	3.14443
ENSMUSG00000010914	Pdhx	5.5273	29.6981	5.37298
ENSMUSG00000010936	Vac14	2.28905	7.68381	3.35677
ENSMUSG00000011114	Tbrg1	4.15461	12.6681	3.04916
ENSMUSG00000011148	Adssl1	34.0885	14.2251	0.4173
ENSMUSG00000011158	Brf1	3.99446	12.654	3.16788
ENSMUSG00000011254	Thg1l	1.96859	16.3969	8.32928
ENSMUSG00000011263	Exoc3l2	1.70935	3.25898	1.90656
ENSMUSG00000011305	Plin5	1.68391	25.338	15.0471
ENSMUSG00000011306	Sugp1	3.77547	23.7431	6.28878
ENSMUSG00000011427	Zfp790	2.3446	13.3636	5.69973
ENSMUSG00000011658	Fuz	6.45059	17.2768	2.67833
ENSMUSG00000011832	Evi5l	3.49532	11.6855	3.34317
ENSMUSG00000011837	Snapc2	2.32254	8.11489	3.49397
ENSMUSG00000011877	Git1	2.95504	7.2217	2.44386
ENSMUSG00000011884	Gltp	5.67927	15.3565	2.70396
ENSMUSG00000011958	Bnip2	5.3577	13.5363	2.52651
ENSMUSG00000012114	Med15	2.62116	9.1731	3.49963
ENSMUSG00000012117	Dhdds	4.23358	16.6565	3.93438
ENSMUSG00000012296	Tjap1	7.05208	12.6965	1.8004
ENSMUSG00000012422	Tmem167	6.47798	10.2634	1.58435
ENSMUSG00000012428	Steap4	11.114	10.617	0.955285
ENSMUSG00000012429	Mplkip	2.18515	36.2602	16.5939
ENSMUSG00000012443	Kif11	4.36531	15.2463	3.4926
ENSMUSG00000012483	Rpa3	27.3957	30.256	1.1044
ENSMUSG00000012519	Mlkl	3.32779	14.8396	4.4593
ENSMUSG00000012535	Tnpo3	2.30148	22.0025	9.56013
ENSMUSG00000012609	Ttll5	3.83245	12.7361	3.32324
ENSMUSG00000012640	Zfp715	3.49187	11.9947	3.43504
ENSMUSG00000012848	Rps5	48.5982	14.6037	0.300498
ENSMUSG00000013033	Adgrl1	3.46601	5.95211	1.71728
ENSMUSG00000013076	Amotl1	3.91684	9.82138	2.50748
ENSMUSG00000013089	Etv5	3.01801	5.60356	1.85671
ENSMUSG00000013150	Gfod2	2.13629	12.6559	5.92421
ENSMUSG00000013160	Atp6v0d1	5.31227	10.3302	1.9446
ENSMUSG00000013275	Slc41a1	18.2637	17.782	0.973629
ENSMUSG00000013465	Nelfb	4.8069	16.8184	3.49881
ENSMUSG00000013495	Tmem175	3.10887	10.95	3.52219
ENSMUSG00000013539	Tango2	2.8393	20.1331	7.09085
ENSMUSG00000013622	Atraid	15.8545	11.607	0.732092
ENSMUSG00000013629	Cad	6.88586	23.4211	3.40133
ENSMUSG00000013646	Sh3bp5l	2.35091	8.38496	3.56668
ENSMUSG00000013662	Atad1	10.5335	24.619	2.33721
ENSMUSG00000013663	Pten	4.79691	16.4161	3.42222
ENSMUSG00000013698	Pea15a	8.68091	20.5782	2.37051
ENSMUSG00000013707	Tnfaip8l2	2.67745	2.91662	1.08933
ENSMUSG00000013736	Trnt1	3.46525	15.3537	4.43076
ENSMUSG00000013787	Ehmt2	8.62092	15.0417	1.74479
ENSMUSG00000013822	Elof1	6.71842	10.0699	1.49885
ENSMUSG00000013833	Med16	8.36564	11.7249	1.40156
ENSMUSG00000013846	St3gal1	2.05726	33.7088	16.3853
ENSMUSG00000013858	Tmem259	17.5368	13.4659	0.767867
ENSMUSG00000013878	Rnf170	7.535	12.269	1.62828
ENSMUSG00000013973	Dedd	6.36059	38.7891	6.09834
ENSMUSG00000013997	Nit1	5.89417	42.3406	7.18347
ENSMUSG00000014039	Prdm15	2.53528	8.64143	3.40847
ENSMUSG00000014074	Rnf168	1.94828	14.704	7.54714
ENSMUSG00000014075	Tctex1d2	8.67276	11.0965	1.27947
ENSMUSG00000014077	Chp1	10.6659	30.2634	2.83739
ENSMUSG00000014158	Trpv4	2.78504	5.95257	2.13733
ENSMUSG00000014164	Klhl3	2.01685	21.5192	10.6697
ENSMUSG00000014195	Dnajc7	3.84682	13.1014	3.40577
ENSMUSG00000014226	Cacybp	4.30741	16.4537	3.81986
ENSMUSG00000014232	Cluap1	4.80088	13.3159	2.77364
ENSMUSG00000014243	Zswim7	8.17203	26.7713	3.27597
ENSMUSG00000014245	Pigl	9.06115	15.4305	1.70293
ENSMUSG00000014294	Ndufa2	7.75234	5.0851	0.655944
ENSMUSG00000014301	Pam16	3.04632	4.14816	1.3617
ENSMUSG00000014303	Glis2	13.5466	5.87441	0.433646
ENSMUSG00000014313	Cox6c	46.6341	11.4377	0.245265
ENSMUSG00000014329	Bicc1	10.7985	7.46439	0.69124
ENSMUSG00000014349	Ube2z	4.07308	26.195	6.43124
ENSMUSG00000014353	Tmem87b	3.12418	16.9264	5.41787
ENSMUSG00000014355	Anapc1	2.83484	14.562	5.13679
ENSMUSG00000014361	Mertk	1.7353	6.13954	3.53803
ENSMUSG00000014402	Tsg101	8.04647	15.3964	1.91344
ENSMUSG00000014418	Hps5	5.13245	11.0142	2.146
ENSMUSG00000014426	Map3k4	2.1605	33.4888	15.5005
ENSMUSG00000014444	Piezo1	4.66659	10.2865	2.20428
ENSMUSG00000014470	Rnf166	8.5639	10.2975	1.20243
ENSMUSG00000014496	Ankrd28	2.84402	15.4543	5.43394
ENSMUSG00000014498	Ankrd52	3.36941	21.8904	6.49681
ENSMUSG00000014503	Pkd2l2	3.68195	7.39542	2.00856
ENSMUSG00000014504	Srp19	3.67538	14.1679	3.85482
ENSMUSG00000014542	Clec4f	3.98229	17.2168	4.32334
ENSMUSG00000014547	Wdfy2	1.44308	6.25754	4.33625
ENSMUSG00000014550	Rbsn	3.0732	19.8457	6.45767
ENSMUSG00000014551	Mrps25	4.3584	10.928	2.50734
ENSMUSG00000014554	Dguok	3.6678	24.5872	6.70354
ENSMUSG00000014599	Csf1	4.16432	8.20589	1.97052
ENSMUSG00000014601	Strip1	2.98711	12.6031	4.21916
ENSMUSG00000014606	Slc25a11	10.6354	22.0816	2.07624
ENSMUSG00000014633	Cmc2	5.73427	9.05662	1.57938
ENSMUSG00000014668	Chfr	4.99368	26.0361	5.21382
ENSMUSG00000014748	Tex261	12.1064	12.4911	1.03178
ENSMUSG00000014763	Fam120b	1.67795	17.6445	10.5155
ENSMUSG00000014767	Tbp	4.66999	15.6102	3.34267
ENSMUSG00000014769	Psmb1	6.92735	14.5062	2.09404
ENSMUSG00000014771	Pdcd2	3.96791	17.5307	4.41811
ENSMUSG00000014773	Dll1	5.29306	34.2067	6.46256
ENSMUSG00000014776	Nol3	7.31794	16.195	2.21306
ENSMUSG00000014778	Fhod1	2.68687	11.0291	4.10481
ENSMUSG00000014791	Elmo3	5.94533	24.1094	4.05518
ENSMUSG00000014837	4931428F04Rik	2.76118	15.2354	5.51774
ENSMUSG00000014850	Msh3	2.3822	13.9691	5.86394
ENSMUSG00000014852	Adamts13	33.3847	45.5676	1.36492
ENSMUSG00000014856	Tmem208	16.2545	12.1382	0.746758
ENSMUSG00000014859	E2f4	3.73269	13.5828	3.63888
ENSMUSG00000014867	Surf4	14.6711	14.6692	0.99987
ENSMUSG00000014873	Surf2	6.22529	10.4559	1.67958
ENSMUSG00000014932	Yes1	2.86221	19.3576	6.76317
ENSMUSG00000014956	Ppp1cb	9.78142	32.9783	3.37153
ENSMUSG00000014959	Gorasp2	3.20706	9.74639	3.03904
ENSMUSG00000014980	Tsen15	2.96313	13.4892	4.55235
ENSMUSG00000015002	Efr3a	4.2261	16.3432	3.86721
ENSMUSG00000015013	Trappc2l	10.5359	15.626	1.48312
ENSMUSG00000015016	Acsf3	14.1992	16.0321	1.12908
ENSMUSG00000015023	Ddx19a	8.75669	25.0771	2.86377
ENSMUSG00000015027	Galns	31.6566	12.7553	0.402926
ENSMUSG00000015053	Gata2	6.65589	6.28385	0.944104
ENSMUSG00000015083	C8g	40.1349	39.9087	0.994363
ENSMUSG00000015087	Rabl6	3.41443	10.8112	3.16634
ENSMUSG00000015092	Edf1	13.4872	16.7281	1.24029
ENSMUSG00000015093	Clic3	1.5596	7.34559	4.70991
ENSMUSG00000015094	Npdc1	29.6149	16.8831	0.570089
ENSMUSG00000015095	Fbxw5	8.62333	13.97	1.62003
ENSMUSG00000015112	Slc25a13	9.04836	44.0756	4.87112
ENSMUSG00000015120	Ube2i	5.08488	15.1409	2.97763
ENSMUSG00000015126	Tsr3	5.68206	15.1992	2.67494
ENSMUSG00000015127	Unkl	4.14777	16.4652	3.96964
ENSMUSG00000015133	Lrrk1	2.75352	10.7953	3.92055
ENSMUSG00000015143	Actn1	3.52378	27.1455	7.70351
ENSMUSG00000015149	Sirt2	11.9692	15.4932	1.29443
ENSMUSG00000015165	Hnrnpl	2.573	23.3835	9.08804
ENSMUSG00000015202	Cnksr3	1.9536	7.31241	3.74304
ENSMUSG00000015217	Hmgb3	9.91608	41.8562	4.22104
ENSMUSG00000015224	Cyp2j9	2.1169	11.0729	5.23068
ENSMUSG00000015243	Abca1	1.91896	12.8537	6.69828
ENSMUSG00000015289	Lage3	15.3484	18.8838	1.23034
ENSMUSG00000015290	Ubl4a	6.50915	25.8255	3.96758
ENSMUSG00000015291	Gdi1	12.8446	29.7797	2.31846
ENSMUSG00000015305	Sash1	1.25646	14.235	11.3295
ENSMUSG00000015335	Zdhhc12	4.88821	12.1351	2.48251
ENSMUSG00000015341	Golga7	12.4811	36.9077	2.95708
ENSMUSG00000015342	Xk	3.49366	34.0647	9.75043
ENSMUSG00000015355	Cd48	2.78846	8.43557	3.02517
ENSMUSG00000015363	Trabd	5.38391	13.3873	2.48654
ENSMUSG00000015377	Dennd6b	5.38116	35.705	6.6352
ENSMUSG00000015437	Gzmb	15.3066	17.3136	1.13112
ENSMUSG00000015461	Atf6b	5.69641	15.7107	2.75799
ENSMUSG00000015468	Notch4	3.45812	8.68313	2.51094
ENSMUSG00000015474	Ppt2	4.57849	13.911	3.03834
ENSMUSG00000015488	Cacfd1	5.81778	13.7698	2.36685
ENSMUSG00000015501	Hivep2	1.79818	7.99066	4.44376
ENSMUSG00000015522	Arnt	2.1289	17.8609	8.38976
ENSMUSG00000015536	Mocs2	5.58929	13.5977	2.4328
ENSMUSG00000015542	Nat9	4.70591	12.9794	2.75812
ENSMUSG00000015597	Zfp318	2.12244	16.6511	7.84524
ENSMUSG00000015647	Lama5	27.5837	9.6971	0.351552
ENSMUSG00000015659	Serac1	2.35981	9.79931	4.15259
ENSMUSG00000015668	Pdzd11	7.20964	12.0974	1.67794
ENSMUSG00000015671	Psma2	3.43786	8.8528	2.57509
ENSMUSG00000015672	Mrpl32	6.21169	47.339	7.62096
ENSMUSG00000015697	Setdb1	3.26394	25.1857	7.71634
ENSMUSG00000015711	Prune	1.9295	12.699	6.58151
ENSMUSG00000015714	Cers2	17.3877	19.7485	1.13577
ENSMUSG00000015733	Capza2	7.27821	13.9012	1.90998
ENSMUSG00000015745	Plekho1	2.62385	4.28233	1.63208
ENSMUSG00000015747	Vps45	3.73819	29.7284	7.95261
ENSMUSG00000015748	Prpf3	5.46909	12.4265	2.27214
ENSMUSG00000015749	Anp32e	4.8889	18.6748	3.81984
ENSMUSG00000015750	Aph1a	24.2812	27.2216	1.1211
ENSMUSG00000015755	Tab2	4.47086	16.6557	3.7254
ENSMUSG00000015757	Ppil4	2.53281	7.84292	3.09652
ENSMUSG00000015759	Cnih1	39.8933	14.6164	0.366388
ENSMUSG00000015776	Med22	4.89417	22.6693	4.63189
ENSMUSG00000015790	Surf1	11.1242	15.4412	1.38808
ENSMUSG00000015804	Med28	4.5472	17.3011	3.80478
ENSMUSG00000015806	Qdpr	7.98122	42.6692	5.3462
ENSMUSG00000015812	Gnrh1	3.28068	4.66266	1.42125
ENSMUSG00000015837	Sqstm1	2.22933	14.6831	6.58634
ENSMUSG00000015839	Nfe2l2	6.68822	24.212	3.6201
ENSMUSG00000015843	Rxrg	1.53673	10.7204	6.97609
ENSMUSG00000015846	Rxra	2.16064	8.05564	3.72836
ENSMUSG00000015850	Adamtsl4	14.8018	10.8957	0.736104
ENSMUSG00000015869	Prpsap1	4.3774	18.4808	4.22187
ENSMUSG00000015882	Lcorl	4.01873	9.1317	2.27229
ENSMUSG00000015889	Lta4h	2.88016	13.0627	4.53541
ENSMUSG00000015932	Dstn	18.0399	14.2495	0.789889
ENSMUSG00000015937	H2afy	16.2543	12.8991	0.793586
ENSMUSG00000015942	Gtf2ird2	3.07253	16.8823	5.49461
ENSMUSG00000015943	Bola1	3.91225	14.9652	3.82523
ENSMUSG00000015944	Gatsl2	3.11844	7.44485	2.38737
ENSMUSG00000015947	Fcgr1	2.52887	8.20357	3.24396
ENSMUSG00000015950	Ncf1	7.22598	10.2745	1.42189
ENSMUSG00000015961	Adss	4.07151	16.5651	4.06854
ENSMUSG00000015966	Il17rb	7.65547	40.9271	5.34612
ENSMUSG00000015970	Chdh	4.96496	27.0018	5.43847
ENSMUSG00000015971	Actr8	2.88535	19.4507	6.74118
ENSMUSG00000015994	Fnta	2.93543	13.5829	4.62723
ENSMUSG00000016018	Skiv2l2	1.60821	17.7132	11.0142
ENSMUSG00000016024	Lbp	11.4795	20.3858	1.77584
ENSMUSG00000016028	Celsr1	2.0102	10.6947	5.32022
ENSMUSG00000016087	Fli1	1.96481	2.50285	1.27384
ENSMUSG00000016128	Stard13	1.05866	18.2825	17.2694
ENSMUSG00000016181	Diexf	3.11828	32.4529	10.4073
ENSMUSG00000016206	H2-M3	4.516	10.0206	2.21891
ENSMUSG00000016239	Lonrf3	5.15738	19.4145	3.76442
ENSMUSG00000016252	Atp5e	22.7129	9.17491	0.403952
ENSMUSG00000016253	Nelfcd	4.06632	20.5623	5.05672
ENSMUSG00000016256	Ctsz	20.0656	9.25037	0.461006
ENSMUSG00000016257	Slmo2	5.38785	14.8744	2.76073
ENSMUSG00000016308	Ube2a	9.82682	17.8149	1.81288
ENSMUSG00000016319	Slc25a5	9.34649	15.3917	1.64679
ENSMUSG00000016344	Ppdpf	7.25446	16.137	2.22443
ENSMUSG00000016382	Pls3	7.98126	10.5117	1.31705
ENSMUSG00000016409	Nkap	2.97484	35.2132	11.837
ENSMUSG00000016427	Ndufa1	10.6591	5.88815	0.552407
ENSMUSG00000016477	E2f3	1.77284	15.9954	9.02252
ENSMUSG00000016481	Cr1l	10.9519	47.0776	4.29859
ENSMUSG00000016487	Ppfibp1	3.04173	22.8133	7.50009
ENSMUSG00000016494	Cd34	3.93467	5.69079	1.44632
ENSMUSG00000016495	Plgrkt	3.64925	9.05333	2.48088
ENSMUSG00000016496	Cd274	6.21399	9.17764	1.47693
ENSMUSG00000016503	Gtf3a	12.187	18.2713	1.49925
ENSMUSG00000016510	Mtif3	3.85431	13.0388	3.38292
ENSMUSG00000016520	Lnx2	2.48722	9.74197	3.91681
ENSMUSG00000016528	Mapkapk2	4.08819	13.9754	3.41848
ENSMUSG00000016541	Atxn10	5.63779	9.89169	1.75453
ENSMUSG00000016554	Eif3d	5.10048	15.8461	3.10678
ENSMUSG00000016619	Nup50	4.49462	44.4851	9.89741
ENSMUSG00000016637	Ift27	7.73129	10.8334	1.40125
ENSMUSG00000016664	Pacsin2	2.07534	9.5649	4.60884
ENSMUSG00000016757	Ttll12	4.32806	9.97605	2.30497
ENSMUSG00000016758	Bik	2.65201	3.90737	1.47336
ENSMUSG00000016831	Tox4	4.30987	23.5978	5.47529
ENSMUSG00000016833	Mrps18c	5.93007	11.9928	2.02238
ENSMUSG00000016933	Plcg1	4.40098	23.0162	5.22979
ENSMUSG00000016940	Kctd2	9.79977	7.53402	0.768796
ENSMUSG00000016946	Kctd5	5.36687	18.9043	3.52241
ENSMUSG00000016984	Etaa1	2.30499	8.97148	3.8922
ENSMUSG00000017009	Sdc4	6.55288	22.9618	3.50408
ENSMUSG00000017057	Il13ra1	14.3175	18.4329	1.28744
ENSMUSG00000017119	Nbr1	2.79477	14.3218	5.12451
ENSMUSG00000017132	Cyth1	2.27564	10.3293	4.53909
ENSMUSG00000017146	Brca1	5.49586	29.6598	5.39675
ENSMUSG00000017176	Nt5c3b	7.18952	19.5317	2.71669
ENSMUSG00000017188	Coa3	4.1179	14.3901	3.49452
ENSMUSG00000017210	Med24	2.2399	13.0352	5.81953
ENSMUSG00000017221	Psmd3	4.19952	16.5645	3.94438
ENSMUSG00000017264	Exosc10	2.73404	17.7633	6.49711
ENSMUSG00000017286	Glod4	11.5288	11.1195	0.9645
ENSMUSG00000017288	Vps53	3.63781	23.8543	6.55732
ENSMUSG00000017299	Dnttip1	5.69209	32.7322	5.75048
ENSMUSG00000017307	Acot8	4.98328	34.1883	6.8606
ENSMUSG00000017309	Cd300lg	3.32029	20.5077	6.17647
ENSMUSG00000017376	Nlk	3.99189	16.2464	4.06985
ENSMUSG00000017386	Traf4	3.10139	43.0273	13.8736
ENSMUSG00000017390	Aldoc	8.87559	11.2116	1.26319
ENSMUSG00000017404	Rpl19	14.2059	8.33959	0.587051
ENSMUSG00000017421	Zfp207	3.59104	19.464	5.42015
ENSMUSG00000017428	Psmd11	2.34132	31.1477	13.3035
ENSMUSG00000017446	C1qtnf1	11.9692	17.9381	1.49869
ENSMUSG00000017453	Pipox	21.1491	12.0337	0.568994
ENSMUSG00000017478	Zc3h18	2.30295	32.5977	14.1548
ENSMUSG00000017485	Top2b	2.41097	14.2196	5.89788
ENSMUSG00000017491	Rarb	1.51538	3.21618	2.12237
ENSMUSG00000017548	Suz12	3.61728	19.4111	5.36623
ENSMUSG00000017550	Atad5	2.4274	10.5157	4.33209
ENSMUSG00000017561	Crlf3	4.37703	17.8181	4.07082
ENSMUSG00000017615	Tnfaip1	3.51491	13.8462	3.93929
ENSMUSG00000017631	Abr	3.10656	13.5649	4.36651
ENSMUSG00000017639	Rab11fip4	2.53383	8.07342	3.18625
ENSMUSG00000017664	Slc35c2	4.93675	11.3837	2.30591
ENSMUSG00000017667	Zfp334	5.33352	14.721	2.7601
ENSMUSG00000017670	Elmo2	2.70498	9.81698	3.62923
ENSMUSG00000017686	Rhot1	1.88004	25.7637	13.7038
ENSMUSG00000017697	Ada	3.12633	4.65781	1.48987
ENSMUSG00000017707	Serinc3	8.13514	12.6367	1.55335
ENSMUSG00000017713	Tha1	14.5423	6.54594	0.45013
ENSMUSG00000017715	Pgs1	2.44908	7.51121	3.06696
ENSMUSG00000017716	Birc5	4.48856	10.3774	2.31197
ENSMUSG00000017718	Afmid	11.4845	47.1307	4.10385
ENSMUSG00000017721	Pigt	5.97302	16.3528	2.73778
ENSMUSG00000017723	Wfdc2	18.4293	6.74353	0.365914
ENSMUSG00000017747	Ghdc	9.9279	17.2999	1.74255
ENSMUSG00000017756	Slc12a7	3.46277	17.4499	5.03929
ENSMUSG00000017760	Ctsa	15.49	15.8005	1.02005
ENSMUSG00000017764	Zswim1	4.20691	10.4381	2.48119
ENSMUSG00000017774	Myo1c	4.30806	11.9657	2.77751
ENSMUSG00000017776	Crk	3.1295	29.6133	9.46262
ENSMUSG00000017778	Cox7c	43.9736	10.6679	0.242597
ENSMUSG00000017781	Pitpna	5.52754	11.9822	2.16773
ENSMUSG00000017801	Mlx	4.27414	14.1159	3.30262
ENSMUSG00000017802	Fam134c	3.95985	16.2369	4.10038
ENSMUSG00000017830	Dhx58	3.48381	12.2289	3.5102
ENSMUSG00000017837	Nkiras2	5.1578	9.72304	1.88511
ENSMUSG00000017843	Ppp2r5c	5.38284	10.1181	1.8797
ENSMUSG00000017858	Ift52	15.0007	22.678	1.5118
ENSMUSG00000017868	Sgk2	1.72427	21.5138	12.4771
ENSMUSG00000017929	B4galt5	1.87106	25.091	13.41
ENSMUSG00000017969	Ptgis	3.40038	7.94862	2.33757
ENSMUSG00000017978	Cadps2	9.13961	29.2559	3.20101
ENSMUSG00000017999	Ddx27	2.66213	26.6688	10.0178
ENSMUSG00000018001	Cyth3	2.06174	4.61458	2.2382
ENSMUSG00000018008	Cyth4	3.0428	5.29859	1.74135
ENSMUSG00000018012	Rac3	3.68435	18.2259	4.94684
ENSMUSG00000018040	Rrp7a	4.94371	20.8368	4.21482
ENSMUSG00000018042	Cyb5r3	13.2159	14.2247	1.07633
ENSMUSG00000018076	Med13l	1.64834	6.47861	3.93038
ENSMUSG00000018167	Stard3	3.7968	6.48496	1.70801
ENSMUSG00000018169	Mfng	4.00097	7.04821	1.76163
ENSMUSG00000018171	Vmp1	5.0748	14.1233	2.78303
ENSMUSG00000018189	Uchl5	5.2554	8.851	1.68417
ENSMUSG00000018196	Glrx2	8.74844	18.3537	2.09794
ENSMUSG00000018209	Stk4	2.50482	11.389	4.54683
ENSMUSG00000018217	Pmp22	2.3018	4.43547	1.92696
ENSMUSG00000018239	Zcchc10	11.227	9.33341	0.831334
ENSMUSG00000018286	Psmb6	6.24434	11.8106	1.89141
ENSMUSG00000018287	Spag7	4.4622	23.4414	5.25334
ENSMUSG00000018293	Pfn1	9.60544	15.6656	1.63091
ENSMUSG00000018322	Tomm34	4.04325	8.15676	2.01738
ENSMUSG00000018326	Ywhab	5.00382	17.7534	3.54796
ENSMUSG00000018334	Ksr1	0.742217	2.66817	3.59486
ENSMUSG00000018339	Gpx3	25.2256	26.9948	1.07014
ENSMUSG00000018340	Anxa6	7.03091	15.466	2.19971
ENSMUSG00000018347	Zkscan6	1.8734	6.10037	3.25632
ENSMUSG00000018362	Kpna2	3.86906	24.7002	6.38403
ENSMUSG00000018363	Smurf2	2.36689	16.0818	6.7945
ENSMUSG00000018377	Vezf1	13.9866	25.976	1.85721
ENSMUSG00000018378	Cuedc1	3.60725	6.91005	1.9156
ENSMUSG00000018379	Srsf1	3.38386	38.1941	11.2871
ENSMUSG00000018381	Abi3	2.98466	6.8253	2.2868
ENSMUSG00000018387	Shroom1	1.59221	12.1703	7.64366
ENSMUSG00000018395	Kif3a	2.20741	9.50652	4.30663
ENSMUSG00000018398	2017-09-08	4.40739	10.557	2.39529
ENSMUSG00000018401	Mtmr4	1.93759	15.869	8.1901
ENSMUSG00000018411	Mapt	5.44029	12.6937	2.33328
ENSMUSG00000018412	Kansl1	2.05249	8.80568	4.29023
ENSMUSG00000018415	Gid4	17.318	11.637	0.671957
ENSMUSG00000018417	Myo1b	3.33722	15.6142	4.6788
ENSMUSG00000018425	Dhx40	4.51067	15.6826	3.47677
ENSMUSG00000018427	Ypel2	2.57019	10.6145	4.12983
ENSMUSG00000018428	Akap1	2.33574	33.063	14.1553
ENSMUSG00000018433	Nol11	3.36292	44.4808	13.2269
ENSMUSG00000018446	C1qbp	35.6444	15.6505	0.439072
ENSMUSG00000018449	Rpain	2.02421	8.50741	4.20282
ENSMUSG00000018459	Slc13a3	46.7357	7.46478	0.159723
ENSMUSG00000018486	Wnt9b	6.45924	2.66868	0.413157
ENSMUSG00000018501	Ncor1	2.2309	33.3764	14.961
ENSMUSG00000018507	Trpv2	3.91809	5.8995	1.50571
ENSMUSG00000018509	Cenpv	2.97986	11.5855	3.88792
ENSMUSG00000018537	Pcgf2	4.03888	7.14177	1.76825
ENSMUSG00000018541	Cwc25	4.50338	43.0521	9.55995
ENSMUSG00000018547	Pip4k2b	2.83983	13.934	4.90664
ENSMUSG00000018548	Trim37	6.01183	11.746	1.95382
ENSMUSG00000018559	Ctdnep1	4.07228	10.7596	2.64215
ENSMUSG00000018565	Elp5	4.09909	11.5431	2.81603
ENSMUSG00000018566	Slc2a4	5.20104	23.3676	4.49287
ENSMUSG00000018567	Gabarap	18.076	10.9818	0.607535
ENSMUSG00000018572	Phf23	4.66375	12.1093	2.59648
ENSMUSG00000018585	Atox1	7.19392	4.58023	0.636682
ENSMUSG00000018599	Mief2	3.41428	21.3728	6.25983
ENSMUSG00000018648	Dusp14	3.24166	8.9253	2.75331
ENSMUSG00000018651	Tada2a	2.16942	9.27833	4.27687
ENSMUSG00000018654	Ikzf1	3.24547	5.75937	1.77458
ENSMUSG00000018661	Cog1	3.08937	15.1303	4.89752
ENSMUSG00000018669	Cdk5rap3	9.20679	20.1413	2.18766
ENSMUSG00000018672	Copz2	32.572	12.5914	0.386573
ENSMUSG00000018677	Slc25a39	11.6603	11.5777	0.992915
ENSMUSG00000018678	Sp2	4.19558	12.6761	3.0213
ENSMUSG00000018697	Aatf	2.07185	16.7174	8.06882
ENSMUSG00000018707	Dync1h1	4.74974	13.0869	2.75528
ENSMUSG00000018727	Cpsf4l	2.43371	9.31898	3.82913
ENSMUSG00000018736	Ndel1	3.62482	13.2562	3.65705
ENSMUSG00000018740	Slc25a35	4.24202	28.6793	6.76077
ENSMUSG00000018750	Zbtb4	1.95998	9.65906	4.92815
ENSMUSG00000018752	Tnfsfm13	26.8473	23.3509	0.869766
ENSMUSG00000018761	Mpdu1	8.7722	12.5555	1.43128
ENSMUSG00000018770	Atp5g3	11.2856	16.3717	1.45068
ENSMUSG00000018774	Cd68	6.31331	7.66122	1.2135
ENSMUSG00000018809	Smyd4	3.19013	9.79674	3.07095
ENSMUSG00000018820	Zfyve27	5.25037	12.0746	2.29975
ENSMUSG00000018821	Avpi1	4.15557	19.6327	4.72444
ENSMUSG00000018830	Myh11	4.00677	19.0138	4.74542
ENSMUSG00000018841	Rad51d	2.53935	10.1993	4.01651
ENSMUSG00000018845	Unc45b	4.77669	7.53114	1.57664
ENSMUSG00000018848	Rars	2.97449	17.5513	5.90061
ENSMUSG00000018849	Wwc1	1.75657	11.8058	6.72094
ENSMUSG00000018858	Ict1	13.0673	13.1985	1.01004
ENSMUSG00000018861	Fdxr	13.1994	17.0796	1.29397
ENSMUSG00000018882	Mrpl45	7.17426	47.2456	6.58542
ENSMUSG00000018906	P4ha2	2.95135	14.4286	4.88882
ENSMUSG00000018909	Arrb1	2.21721	6.8682	3.09768
ENSMUSG00000018920	Cxcl16	8.69996	14.7913	1.70016
ENSMUSG00000018921	Pelp1	2.16048	15.5906	7.21626
ENSMUSG00000018923	Med11	4.74006	10.8076	2.28006
ENSMUSG00000018927	Ccl6	4.84638	12.1938	2.51605
ENSMUSG00000018931	Natd1	3.78583	9.24421	2.4418
ENSMUSG00000018932	Map2k3	3.59298	14.4598	4.02447
ENSMUSG00000018965	Ywhah	7.45319	14.7964	1.98524
ENSMUSG00000018974	Sart3	2.87977	15.6572	5.43694
ENSMUSG00000018995	Nars2	7.01368	18.545	2.64411
ENSMUSG00000018999	Slc35b4	2.02739	9.41477	4.6438
ENSMUSG00000019039	Dalrd3	10.3352	26.1905	2.53411
ENSMUSG00000019054	Fis1	22.7809	18.2544	0.801304
ENSMUSG00000019055	Plod1	9.37619	34.6797	3.6987
ENSMUSG00000019066	Rab3d	6.43923	17.7667	2.75913
ENSMUSG00000019087	Atp6ap1	12.778	16.3321	1.27814
ENSMUSG00000019088	Dnase1l1	6.03601	11.1946	1.85463
ENSMUSG00000019132	BC005537	3.8734	23.7897	6.14183
ENSMUSG00000019139	Isyna1	39.2558	30.3468	0.773053
ENSMUSG00000019143	Hars2	3.96974	17.6875	4.45558
ENSMUSG00000019179	Mdh2	10.2718	9.16715	0.892457
ENSMUSG00000019188	H13	11.1325	10.6397	0.955732
ENSMUSG00000019189	Rnf145	4.55935	3.50039	0.767739
ENSMUSG00000019194	Scn1b	6.87899	10.7004	1.55551
ENSMUSG00000019210	Atp6v1e1	16.4812	13.6572	0.828651
ENSMUSG00000019232	Etnppl	6.36399	32.2602	5.06918
ENSMUSG00000019254	Ppp1r12c	6.28167	7.73125	1.23076
ENSMUSG00000019261	Map1s	3.89673	9.26111	2.37664
ENSMUSG00000019278	Dpep1	9.93612	8.97714	0.903486
ENSMUSG00000019295	Tmem129	9.11995	42.6578	4.67741
ENSMUSG00000019297	Nop9	3.55439	17.4885	4.92026
ENSMUSG00000019302	Atp6v0a1	9.25334	13.3704	1.44492
ENSMUSG00000019312	Grb7	3.36287	15.1187	4.49578
ENSMUSG00000019338	Zfp687	3.03447	14.6727	4.83533
ENSMUSG00000019362	D8Ertd738e	23.0474	14.3467	0.62249
ENSMUSG00000019370	Calm3	9.95788	12.1988	1.22504
ENSMUSG00000019373	Cops3	3.22653	15.3307	4.75145
ENSMUSG00000019428	Fkbp8	14.8595	13.2729	0.893222
ENSMUSG00000019432	Ddx39b	6.198	17.6283	2.84419
ENSMUSG00000019433	Gipc1	3.9197	11.2461	2.86911
ENSMUSG00000019437	Tlcd1	9.6992	22.1261	2.28123
ENSMUSG00000019461	Plscr3	3.86132	20.3232	5.26329
ENSMUSG00000019464	Ptger1	4.4521	8.04706	1.80748
ENSMUSG00000019467	Arhgef25	2.85262	7.26708	2.54751
ENSMUSG00000019470	Xab2	3.97392	14.7185	3.70376
ENSMUSG00000019471	Cdc37	10.1237	19.5075	1.9269
ENSMUSG00000019478	Rab4a	5.9324	14.2232	2.39754
ENSMUSG00000019487	Trip10	8.14389	23.8633	2.93021
ENSMUSG00000019494	Cops6	17.3021	46.41	2.68233
ENSMUSG00000019505	Ubb	32.8706	12.4451	0.378608
ENSMUSG00000019518	Ap4m1	6.72096	16.8252	2.50339
ENSMUSG00000019528	Gyg	18.8373	12.373	0.656836
ENSMUSG00000019558	Slc6a8	17.9824	34.8834	1.93986
ENSMUSG00000019564	Arid3a	2.35266	7.96711	3.38643
ENSMUSG00000019578	Ubxn6	17.4278	34.7306	1.99283
ENSMUSG00000019579	Mydgf	6.91719	11.7764	1.70248
ENSMUSG00000019590	Cyb561	14.7574	8.62931	0.584746
ENSMUSG00000019647	Sema6a	1.10289	6.97732	6.32642
ENSMUSG00000019659	Ccdc12	4.8589	9.88979	2.0354
ENSMUSG00000019689	1110001J03Rik	14.8775	7.61716	0.511992
ENSMUSG00000019699	Akt3	3.01317	12.5283	4.15785
ENSMUSG00000019710	Mrpl24	6.08992	29.1631	4.78875
ENSMUSG00000019715	Gle1	3.50615	10.2678	2.92851
ENSMUSG00000019731	Slc35e1	7.98448	26.2016	3.28157
ENSMUSG00000019734	Tmc4	4.84666	20.1985	4.16751
ENSMUSG00000019737	Syne4	5.43648	9.14841	1.68278
ENSMUSG00000019738	Polr2i	3.86622	5.03489	1.30228
ENSMUSG00000019756	Prl8a1	1.3133	1.62944	1.24072
ENSMUSG00000019763	Rmnd1	3.84334	17.2032	4.47611
ENSMUSG00000019768	Esr1	3.73637	8.39999	2.24817
ENSMUSG00000019773	Fbxo5	9.79615	14.5701	1.48733
ENSMUSG00000019777	Hdac2	3.30243	24.4001	7.38855
ENSMUSG00000019779	Frk	2.77583	16.2528	5.85512
ENSMUSG00000019782	Rwdd1	12.3934	17.5184	1.41352
ENSMUSG00000019790	Stxbp5	2.0609	6.86285	3.33002
ENSMUSG00000019791	Hint3	8.65428	14.7483	1.70416
ENSMUSG00000019792	Trmt11	2.16412	23.7816	10.9891
ENSMUSG00000019794	Katna1	3.73014	9.75537	2.61529
ENSMUSG00000019795	Pcmt1	4.69525	12.5627	2.67563
ENSMUSG00000019796	Lrp11	28.436	17.0935	0.601122
ENSMUSG00000019797	1700021F05Rik	2.69782	11.6334	4.31214
ENSMUSG00000019802	Sec63	12.1661	12.5029	1.02768
ENSMUSG00000019804	Snx3	7.03921	18.0949	2.57058
ENSMUSG00000019808	Adat2	10.3203	27.5865	2.67304
ENSMUSG00000019809	Pex3	5.28747	16.1801	3.06009
ENSMUSG00000019810	Fuca2	6.14179	17.8475	2.90592
ENSMUSG00000019813	Cep57l1	1.82317	9.90153	5.43093
ENSMUSG00000019814	Ltv1	2.6945	20.0443	7.43897
ENSMUSG00000019818	Cd164	21.6541	32.1853	1.48634
ENSMUSG00000019820	Utrn	4.35066	14.1624	3.25523
ENSMUSG00000019822	Smpd2	2.17316	8.00466	3.68343
ENSMUSG00000019826	Zbtb24	4.90551	14.1703	2.88865
ENSMUSG00000019831	Wasf1	2.02166	10.5915	5.23899
ENSMUSG00000019832	Rab32	2.94752	11.3233	3.84162
ENSMUSG00000019837	Gtf3c6	4.47145	17.6875	3.95565
ENSMUSG00000019841	Rev3l	1.46076	6.4783	4.43487
ENSMUSG00000019842	Traf3ip2	1.92996	7.6417	3.95951
ENSMUSG00000019843	Fyn	2.18317	6.23841	2.8575
ENSMUSG00000019846	Lama4	1.83582	5.80262	3.16077
ENSMUSG00000019849	Prep	3.6323	11.7189	3.22629
ENSMUSG00000019854	Reps1	2.91602	12.0629	4.13676
ENSMUSG00000019857	Asf1a	3.76618	20.2521	5.37736
ENSMUSG00000019861	Gopc	2.799	38.3678	13.7077
ENSMUSG00000019863	Qrsl1	3.01023	14.3008	4.75075
ENSMUSG00000019868	Vta1	2.6678	10.3555	3.88168
ENSMUSG00000019872	Smpdl3a	19.2214	21.4195	1.11435
ENSMUSG00000019874	Fabp7	1.43705	4.92502	3.42717
ENSMUSG00000019876	Pkib	4.06403	7.74216	1.90505
ENSMUSG00000019877	Serinc1	35.4929	39.8986	1.12413
ENSMUSG00000019878	Hsf2	1.85061	12.4361	6.71998
ENSMUSG00000019880	Rspo3	1.85645	2.60143	1.40129
ENSMUSG00000019889	Ptprk	2.78188	15.7568	5.66407
ENSMUSG00000019891	Dcbld1	2.29717	13.1756	5.73557
ENSMUSG00000019897	Ccdc59	3.2382	14.7593	4.55787
ENSMUSG00000019907	Ppp1r12a	1.82112	23.7924	13.0647
ENSMUSG00000019916	P4ha1	3.33398	31.6399	9.49011
ENSMUSG00000019917	2017-09-10	3.44293	15.1596	4.40312
ENSMUSG00000019920	Lims1	4.27283	14.7063	3.44182
ENSMUSG00000019923	Zwint	13.4945	16.3519	1.21175
ENSMUSG00000019927	Ube2d1	4.39169	19.4586	4.43078
ENSMUSG00000019942	Cdk1	3.07911	13.1208	4.26125
ENSMUSG00000019943	Atp2b1	2.84825	7.02706	2.46715
ENSMUSG00000019944	Rhobtb1	2.35885	14.1225	5.98702
ENSMUSG00000019945	1700040L02Rik	6.80221	11.3717	1.67176
ENSMUSG00000019951	Uhrf1bp1l	3.72133	19.3895	5.21037
ENSMUSG00000019952	Poc1b	7.05065	13.4587	1.90886
ENSMUSG00000019961	Tmpo	2.51975	30.6305	12.1562
ENSMUSG00000019966	Kitl	2.54792	5.71772	2.24407
ENSMUSG00000019969	Psen1	3.03137	13.0474	4.30414
ENSMUSG00000019970	Sgk1	39.1757	33.7499	0.861502
ENSMUSG00000019971	Cep290	2.58233	5.44257	2.10762
ENSMUSG00000019975	Ikbip	14.2523	33.9942	2.38518
ENSMUSG00000019977	Hbs1l	3.94433	10.4936	2.66043
ENSMUSG00000019978	Epb4.1l2	5.3046	10.2143	1.92555
ENSMUSG00000019979	Apaf1	1.9708	15.0588	7.64095
ENSMUSG00000019984	Med23	3.7346	23.4085	6.26801
ENSMUSG00000019988	Nedd1	2.92407	46.3826	15.8624
ENSMUSG00000019990	Pde7b	1.90102	2.48755	1.30854
ENSMUSG00000019996	Map7	2.11514	31.1839	14.7432
ENSMUSG00000019997	Ctgf	3.26491	4.54649	1.39253
ENSMUSG00000019998	Stx7	2.76295	9.77349	3.53734
ENSMUSG00000020003	Pex7	13.0989	29.9857	2.28917
ENSMUSG00000020009	Ifngr1	5.91562	15.4601	2.61344
ENSMUSG00000020015	Cdk17	1.65878	31.1701	18.791
ENSMUSG00000020018	Snrpf	28.1848	26.8057	0.951067
ENSMUSG00000020019	Ntn4	3.10714	32.527	10.4685
ENSMUSG00000020021	Fgd6	1.66778	25.9311	15.5483
ENSMUSG00000020024	Cep83	6.68107	8.03622	1.20283
ENSMUSG00000020027	Socs2	2.41583	32.3758	13.4016
ENSMUSG00000020032	Nuak1	2.00895	9.47471	4.71625
ENSMUSG00000020034	Tcp11l2	4.4963	35.9507	7.99562
ENSMUSG00000020038	Cry1	2.4381	20.862	8.55665
ENSMUSG00000020042	Btbd11	1.22753	4.04415	3.29454
ENSMUSG00000020044	Timp3	4.55961	7.8678	1.72554
ENSMUSG00000020048	Hsp90b1	12.8823	17.7455	1.37751
ENSMUSG00000020053	Igf1	6.97349	17.7556	2.54616
ENSMUSG00000020056	Ccdc53	5.23545	20.5654	3.92811
ENSMUSG00000020057	Dram1	3.05431	9.17375	3.00354
ENSMUSG00000020064	Herc4	2.2715	19.81	8.72111
ENSMUSG00000020069	Hnrnph3	3.53453	27.1514	7.68176
ENSMUSG00000020070	Rufy2	4.11692	12.7125	3.08786
ENSMUSG00000020072	Pbld2	13.883	25.5601	1.84111
ENSMUSG00000020074	Ccar1	2.86559	14.7858	5.15976
ENSMUSG00000020075	Ddx21	7.95804	36.6314	4.60307
ENSMUSG00000020076	Ddx50	13.683	15.9455	1.16535
ENSMUSG00000020078	Vps26a	4.68993	14.8394	3.16409
ENSMUSG00000020079	Supv3l1	5.28226	34.7243	6.57376
ENSMUSG00000020085	Aifm2	4.53897	13.1927	2.90654
ENSMUSG00000020086	H2afy2	3.31955	9.29039	2.79869
ENSMUSG00000020088	Sar1a	7.28587	30.5256	4.1897
ENSMUSG00000020089	Ppa1	8.78159	26.2756	2.99212
ENSMUSG00000020091	Eif4ebp2	2.64279	7.37194	2.78945
ENSMUSG00000020092	Pald1	2.16784	4.63639	2.13871
ENSMUSG00000020097	Sgpl1	3.56829	11.5324	3.23191
ENSMUSG00000020099	Unc5b	5.77955	23.8479	4.12627
ENSMUSG00000020100	Slc29a3	2.31443	18.2383	7.88028
ENSMUSG00000020101	4632428N05Rik	2.87549	5.10116	1.77401
ENSMUSG00000020102	Slc16a7	17.6862	14.0054	0.791884
ENSMUSG00000020105	Lrig3	2.14826	7.1758	3.34028
ENSMUSG00000020107	Anapc16	6.80708	14.9159	2.19123
ENSMUSG00000020108	Ddit4	6.68639	8.50851	1.27251
ENSMUSG00000020109	Dnajb12	3.8219	25.9791	6.79744
ENSMUSG00000020111	Micu1	10.886	18.0264	1.65592
ENSMUSG00000020114	Cand1	2.41403	25.1039	10.3992
ENSMUSG00000020115	Tbk1	3.3918	14.6772	4.32726
ENSMUSG00000020116	Pno1	21.1207	29.4962	1.39655
ENSMUSG00000020122	Egfr	2.04563	16.7166	8.17186
ENSMUSG00000020124	Usp15	3.52435	10.6736	3.02852
ENSMUSG00000020128	Vps54	7.13366	10.4211	1.46084
ENSMUSG00000020130	Tbc1d15	2.68699	14.1841	5.27882
ENSMUSG00000020133	2310011J03Rik	2.73662	8.69853	3.17856
ENSMUSG00000020142	Slc1a4	4.86437	34.1234	7.01496
ENSMUSG00000020143	Dock2	2.86069	9.37562	3.27739
ENSMUSG00000020149	Rab1	2.67266	9.56461	3.57868
ENSMUSG00000020152	Actr2	15.3354	13.0357	0.85004
ENSMUSG00000020153	Ndufs7	6.36456	14.5363	2.28394
ENSMUSG00000020154	Ptprb	3.0455	16.9683	5.57161
ENSMUSG00000020156	Mum1	2.25432	10.3181	4.57702
ENSMUSG00000020160	Meis1	1.89437	16.2025	8.55296
ENSMUSG00000020163	Uqcr11	15.5297	7.43012	0.478446
ENSMUSG00000020166	Cnot2	1.87755	12.7893	6.8117
ENSMUSG00000020167	Tcf3	3.46146	18.8787	5.45397
ENSMUSG00000020170	Frs2	2.88666	14.5225	5.0309
ENSMUSG00000020173	Cobl	1.97892	13.8511	6.99934
ENSMUSG00000020176	Grb10	4.87771	14.8268	3.0397
ENSMUSG00000020178	Adora2a	10.1362	3.48019	0.343342
ENSMUSG00000020180	Snrpd3	6.29695	22.6627	3.59899
ENSMUSG00000020186	Csrp2	7.7131	8.38146	1.08665
ENSMUSG00000020189	Osbpl8	2.62536	15.8852	6.05067
ENSMUSG00000020196	Cabin1	2.61718	17.4529	6.66857
ENSMUSG00000020198	Ap3d1	3.38221	15.1673	4.48442
ENSMUSG00000020211	Sf3a2	3.98728	13.0516	3.27332
ENSMUSG00000020212	Mdm1	6.34144	24.9089	3.92795
ENSMUSG00000020219	Timm13	16.5812	11.6726	0.703967
ENSMUSG00000020220	Vps13d	3.00915	15.403	5.11872
ENSMUSG00000020224	Llph	8.5625	34.7541	4.05887
ENSMUSG00000020225	Tmbim4	17.0979	12.686	0.741959
ENSMUSG00000020227	Irak3	13.5557	14.3052	1.05529
ENSMUSG00000020228	Helb	2.44083	48.3869	19.8239
ENSMUSG00000020231	Dip2a	5.20766	14.7596	2.83421
ENSMUSG00000020232	Hmg20b	34.2049	33.2205	0.971221
ENSMUSG00000020235	Fzr1	3.21885	20.7773	6.45487
ENSMUSG00000020238	Ncln	6.40744	12.76	1.99144
ENSMUSG00000020246	Hcfc2	3.05871	15.6536	5.11771
ENSMUSG00000020248	Nfyb	14.1909	38.2455	2.69508
ENSMUSG00000020258	Glyctk	3.96208	10.9533	2.76452
ENSMUSG00000020261	Slc36a1	3.53417	7.70019	2.17878
ENSMUSG00000020262	Adarb1	2.70989	23.7599	8.76786
ENSMUSG00000020263	Appl2	3.98398	8.98956	2.25643
ENSMUSG00000020265	Sumo3	3.51154	14.4467	4.11406
ENSMUSG00000020267	Hint1	10.2662	14.7555	1.43729
ENSMUSG00000020271	Fbxw11	2.9215	13.9095	4.76108
ENSMUSG00000020272	Stk10	2.51619	12.2805	4.8806
ENSMUSG00000020277	Pfkl	5.29344	27.6367	5.22094
ENSMUSG00000020280	Pus10	2.13211	13.5138	6.33825
ENSMUSG00000020283	Pex13	2.88517	10.7544	3.7275
ENSMUSG00000020284	1810043G02Rik	19.2643	12.2341	0.635068
ENSMUSG00000020287	Mpg	12.1888	31.129	2.55389
ENSMUSG00000020288	Ahsa2	3.11564	9.79133	3.14264
ENSMUSG00000020289	Nprl3	4.44528	11.9474	2.68766
ENSMUSG00000020290	Xpo1	2.49146	15.7861	6.33608
ENSMUSG00000020305	Asb3	1.61637	12.7063	7.86104
ENSMUSG00000020307	Cdc34	9.58475	25.3421	2.64401
ENSMUSG00000020308	Tpgs1	6.30513	44.6225	7.07716
ENSMUSG00000020311	Erlec1	12.7481	18.4045	1.44371
ENSMUSG00000020315	Sptbn1	7.5357	25.4472	3.37689
ENSMUSG00000020321	Mdh1	10.2386	19.7129	1.92536
ENSMUSG00000020329	Polrmt	2.28484	22.147	9.69303
ENSMUSG00000020330	Hmmr	1.90164	6.987	3.6742
ENSMUSG00000020334	Slc22a4	6.52148	6.36832	0.976515
ENSMUSG00000020346	Mgat1	2.14247	13.2844	6.20049
ENSMUSG00000020349	Ppp2ca	2.85922	27.5389	9.63162
ENSMUSG00000020357	Flt4	7.73282	14.1532	1.83028
ENSMUSG00000020361	Hspa4	2.6019	13.0601	5.01947
ENSMUSG00000020362	Cnot6	44.0057	16.3572	0.371707
ENSMUSG00000020364	Zfp354a	2.42454	10.9266	4.50667
ENSMUSG00000020366	Mapk9	6.91077	17.7961	2.57513
ENSMUSG00000020372	Gnb2l1	16.1353	11.9613	0.741311
ENSMUSG00000020375	Rufy1	2.76357	19.4743	7.04681
ENSMUSG00000020377	Ltc4s	3.2043	21.6846	6.76735
ENSMUSG00000020380	Rad50	1.78967	12.3464	6.89869
ENSMUSG00000020381	3010026O09Rik	4.85804	10.2136	2.10241
ENSMUSG00000020385	Clk4	3.52109	12.7662	3.62565
ENSMUSG00000020387	Jade2	2.43518	6.19528	2.54407
ENSMUSG00000020388	Pdlim4	1.62524	3.59903	2.21446
ENSMUSG00000020390	Ube2b	8.79702	29.2618	3.32633
ENSMUSG00000020392	Cdkn2aipnl	5.28157	16.796	3.18012
ENSMUSG00000020393	Kremen1	6.07375	10.1733	1.67495
ENSMUSG00000020397	Med7	8.98739	26.4094	2.93849
ENSMUSG00000020400	Tnip1	3.81634	18.4661	4.8387
ENSMUSG00000020402	Vdac1	35.6124	26.1622	0.734636
ENSMUSG00000020409	Slu7	4.38751	17.1369	3.90583
ENSMUSG00000020412	Ascc2	3.15762	14.2946	4.52702
ENSMUSG00000020413	Hus1	2.44068	19.8742	8.14291
ENSMUSG00000020415	Pttg1	4.03901	11.9421	2.95668
ENSMUSG00000020420	Zfp607	4.07317	9.99212	2.45316
ENSMUSG00000020422	Tns3	1.44922	11.9129	8.22026
ENSMUSG00000020424	Gatsl3	21.3521	8.8339	0.413725
ENSMUSG00000020430	Pes1	4.18434	14.1687	3.38612
ENSMUSG00000020432	Tcn2	17.1392	13.9956	0.816581
ENSMUSG00000020439	Smtn	4.03031	13.3547	3.31355
ENSMUSG00000020440	Arf5	27.4561	25.7672	0.938487
ENSMUSG00000020448	Rnf185	3.48611	12.326	3.53574
ENSMUSG00000020451	Limk2	3.06957	8.05157	2.62302
ENSMUSG00000020453	Patz1	2.98948	12.9255	4.32367
ENSMUSG00000020454	Eif4enif1	3.53889	28.784	8.13363
ENSMUSG00000020455	Trim11	3.52435	12.7013	3.60387
ENSMUSG00000020456	Ogdh	11.3784	32.2894	2.83777
ENSMUSG00000020457	Drg1	3.45259	33.0574	9.57467
ENSMUSG00000020460	Rps27a	32.3221	19.1207	0.591567
ENSMUSG00000020462	Cfap36	9.41045	11.6609	1.23914
ENSMUSG00000020463	Smek2	2.71525	11.9697	4.40833
ENSMUSG00000020464	Pnpt1	10.7352	18.8207	1.75318
ENSMUSG00000020471	Pold2	1.68761	12.2144	7.23771
ENSMUSG00000020472	Zkscan17	6.54337	8.56241	1.30856
ENSMUSG00000020474	Polm	2.58644	10.2052	3.94564
ENSMUSG00000020475	Pgam2	2.93917	5.19836	1.76865
ENSMUSG00000020476	Dbnl	3.7143	13.2728	3.57343
ENSMUSG00000020484	Xbp1	1.83997	16.3261	8.873
ENSMUSG00000020485	Supt4a	10.9862	9.80898	0.892842
ENSMUSG00000020486	2017-09-04	2.87808	4.91466	1.70762
ENSMUSG00000020491	2810021J22Rik	3.18278	6.27633	1.97196
ENSMUSG00000020492	Ska2	3.13515	10.0101	3.19287
ENSMUSG00000020495	Smg8	10.8665	28.1563	2.59112
ENSMUSG00000020496	Rnf187	14.6731	22.4095	1.52725
ENSMUSG00000020513	Tubd1	1.45864	15.5789	10.6805
ENSMUSG00000020514	Mrpl22	3.94382	19.8171	5.02484
ENSMUSG00000020515	Cnot8	4.49567	10.8447	2.41226
ENSMUSG00000020516	Rps6kb1	5.32511	25.8608	4.85639
ENSMUSG00000020520	Galnt10	5.04315	10.2939	2.04117
ENSMUSG00000020521	Rnft1	7.16972	33.2977	4.64421
ENSMUSG00000020522	Mfap3	3.90525	13.3248	3.41203
ENSMUSG00000020523	Fam114a2	4.00218	22.5985	5.64654
ENSMUSG00000020525	Ppm1d	5.96967	16.263	2.72428
ENSMUSG00000020526	Znhit3	3.69729	13.8786	3.75371
ENSMUSG00000020527	Myo19	13.5703	34.0714	2.51073
ENSMUSG00000020528	Prpsap2	2.75908	16.2422	5.88681
ENSMUSG00000020530	Ggnbp2	2.71997	10.0296	3.68739
ENSMUSG00000020532	Acaca	4.64286	10.6616	2.29634
ENSMUSG00000020536	Llgl1	3.11471	12.2969	3.948
ENSMUSG00000020537	Drg2	3.52222	11.4357	3.24673
ENSMUSG00000020538	Srebf1	2.37544	18.9764	7.98857
ENSMUSG00000020541	Tom1l1	3.63423	24.2432	6.6708
ENSMUSG00000020547	Bzw2	3.81904	43.6296	11.4242
ENSMUSG00000020549	Elac2	6.44026	21.4258	3.32685
ENSMUSG00000020561	Twistnb	2.58261	36.3759	14.085
ENSMUSG00000020564	Atxn7l1	2.94561	7.48839	2.54222
ENSMUSG00000020570	Sypl	11.9292	19.5364	1.6377
ENSMUSG00000020572	Nampt	3.53065	10.4823	2.96894
ENSMUSG00000020573	Pik3cg	4.17601	10.9142	2.61355
ENSMUSG00000020576	Nbas	4.6079	14.9037	3.23439
ENSMUSG00000020577	Tspan13	7.261	40.4489	5.57071
ENSMUSG00000020580	Rock2	2.43031	12.8718	5.29638
ENSMUSG00000020589	Fam49a	1.01279	2.96775	2.93027
ENSMUSG00000020590	Snx13	1.77369	7.63149	4.30261
ENSMUSG00000020593	Lpin1	1.72866	23.57	13.6348
ENSMUSG00000020601	Trib2	2.79537	3.60695	1.29033
ENSMUSG00000020605	Hs1bp3	1.89769	7.90378	4.16494
ENSMUSG00000020608	Smc6	3.36328	12.0188	3.57354
ENSMUSG00000020609	Apob	10.0975	23.8711	2.36406
ENSMUSG00000020610	Amz2	5.39525	14.1343	2.61976
ENSMUSG00000020611	Gna13	5.56517	16.1502	2.90202
ENSMUSG00000020612	Prkar1a	4.11861	24.6242	5.97876
ENSMUSG00000020614	Fam20a	2.16923	13.1389	6.05692
ENSMUSG00000020623	Map2k6	3.45091	23.3205	6.75778
ENSMUSG00000020628	Trappc12	2.51627	28.4273	11.2974
ENSMUSG00000020629	Adi1	20.0749	14.1389	0.704306
ENSMUSG00000020630	Rnaseh1	2.93399	11.7285	3.99746
ENSMUSG00000020634	Ubxn2a	8.31781	23.5797	2.83484
ENSMUSG00000020638	Cmpk2	2.50103	16.9554	6.77938
ENSMUSG00000020640	Itsn2	2.2799	16.321	7.15866
ENSMUSG00000020641	Rsad2	7.57321	13.5849	1.79381
ENSMUSG00000020647	Ncoa1	1.79736	8.43439	4.69264
ENSMUSG00000020649	Rrm2	4.34603	32.0754	7.38039
ENSMUSG00000020650	Bcap29	27.5284	17.1397	0.622619
ENSMUSG00000020652	Cenpo	3.16178	8.65541	2.73751
ENSMUSG00000020656	Grhl1	2.34838	11.3596	4.83722
ENSMUSG00000020659	Cbll1	5.01554	23.7336	4.73201
ENSMUSG00000020661	Dnmt3a	2.95752	19.4962	6.59209
ENSMUSG00000020664	Dld	22.3269	17.3329	0.776322
ENSMUSG00000020668	Kif3c	4.46885	23.6693	5.29651
ENSMUSG00000020669	Sh3yl1	4.39737	21.5861	4.90887
ENSMUSG00000020671	Rab10	3.76841	25.3252	6.72039
ENSMUSG00000020674	Pxdn	10.6224	25.8649	2.43495
ENSMUSG00000020677	Ddx52	5.59954	12.7172	2.27111
ENSMUSG00000020679	Hnf1b	2.52344	14.2979	5.66601
ENSMUSG00000020681	Ace	12.8931	18.293	1.41882
ENSMUSG00000020687	Cdc27	1.96858	9.99454	5.07703
ENSMUSG00000020689	Itgb3	2.73095	7.06847	2.58829
ENSMUSG00000020692	Nle1	11.5483	37.7104	3.26544
ENSMUSG00000020694	Tlk2	1.93798	11.3436	5.85331
ENSMUSG00000020696	Rffl	2.39225	11.5649	4.83431
ENSMUSG00000020700	Map3k3	2.32883	6.67664	2.86695
ENSMUSG00000020701	Tmem132e	1.66202	3.72942	2.2439
ENSMUSG00000020705	Ddx42	3.58195	30.9118	8.62987
ENSMUSG00000020706	Ftsj3	3.26088	33.7823	10.3599
ENSMUSG00000020707	Rnf135	3.32229	15.1628	4.56396
ENSMUSG00000020708	Psmc5	3.75552	21.5194	5.73006
ENSMUSG00000020709	Adap2	3.35735	10.8369	3.22782
ENSMUSG00000020715	Ern1	3.38558	33.854	9.99946
ENSMUSG00000020716	Nf1	3.02654	19.3868	6.40559
ENSMUSG00000020717	Pecam1	5.88831	8.46846	1.43818
ENSMUSG00000020718	Polg2	8.15348	29.1279	3.57244
ENSMUSG00000020719	Ddx5	4.8706	40.6725	8.35062
ENSMUSG00000020720	Psmd12	2.92393	28.4256	9.72174
ENSMUSG00000020721	Helz	1.95809	10.5812	5.40384
ENSMUSG00000020733	Slc9a3r1	4.61669	16.7705	3.63259
ENSMUSG00000020736	Nt5c	5.46451	18.0501	3.30316
ENSMUSG00000020737	Hn1	33.2889	12.2423	0.367758
ENSMUSG00000020738	Sumo2	4.79867	12.4985	2.60458
ENSMUSG00000020739	Nup85	4.42619	12.9837	2.93337
ENSMUSG00000020740	Gga3	3.43719	9.51994	2.76968
ENSMUSG00000020743	Mif4gd	2.2019	10.8572	4.93084
ENSMUSG00000020744	Slc25a19	3.3208	7.33001	2.2073
ENSMUSG00000020745	Pafah1b1	2.5515	18.7995	7.36799
ENSMUSG00000020747	2310067B10Rik	6.55725	28.7718	4.38778
ENSMUSG00000020752	Recql5	2.43005	18.0684	7.43542
ENSMUSG00000020755	Sap30bp	3.00678	15.1872	5.051
ENSMUSG00000020766	Galk1	9.17663	12.2839	1.3386
ENSMUSG00000020770	Unk	3.60062	37.3409	10.3707
ENSMUSG00000020773	Trim47	5.84184	18.4762	3.16273
ENSMUSG00000020774	Aspa	5.47949	30.6486	5.59333
ENSMUSG00000020775	Mrpl38	13.2336	43.466	3.28453
ENSMUSG00000020778	Ten1	5.90875	7.00234	1.18508
ENSMUSG00000020780	Srp68	2.54113	18.9685	7.4646
ENSMUSG00000020781	Tsen54	5.32236	22.8288	4.28922
ENSMUSG00000020782	Llgl2	2.28426	27.7445	12.1459
ENSMUSG00000020783	1200014J11Rik	2.92525	13.684	4.67789
ENSMUSG00000020790	Ankfy1	3.39025	15.4314	4.55169
ENSMUSG00000020792	Exoc7	4.07352	10.1833	2.49989
ENSMUSG00000020801	Med31	5.85894	20.5295	3.50396
ENSMUSG00000020802	Ube2o	2.98128	12.9576	4.3463
ENSMUSG00000020803	Txndc17	24.675	9.07284	0.367693
ENSMUSG00000020806	Rhbdf2	3.6213	14.6082	4.03396
ENSMUSG00000020807	4933427D14Rik	2.76541	7.34969	2.65772
ENSMUSG00000020810	Cygb	12.5629	6.83637	0.54417
ENSMUSG00000020812	1810032O08Rik	8.70482	21.7829	2.5024
ENSMUSG00000020817	Rabep1	2.07599	11.2355	5.41209
ENSMUSG00000020818	Mfsd11	5.10788	25.5646	5.00494
ENSMUSG00000020821	Kif1c	6.76233	15.7534	2.32959
ENSMUSG00000020823	Sec14l1	2.50402	7.99075	3.19117
ENSMUSG00000020827	Mink1	5.09671	22.0106	4.31859
ENSMUSG00000020828	Pld2	3.13696	10.0078	3.19028
ENSMUSG00000020829	Slc46a1	14.9342	14.3397	0.960193
ENSMUSG00000020830	Vmo1	2.00077	5.83721	2.91749
ENSMUSG00000020832	Eral1	5.87521	27.9213	4.75239
ENSMUSG00000020834	Dhrs13	6.31813	12.6263	1.99843
ENSMUSG00000020840	Blmh	4.34812	34.8369	8.01194
ENSMUSG00000020841	Cpd	8.62377	40.9013	4.74286
ENSMUSG00000020843	Timm22	4.60652	15.3672	3.33597
ENSMUSG00000020844	Nxn	2.02951	5.20234	2.56335
ENSMUSG00000020847	Rph3al	5.28423	9.25745	1.7519
ENSMUSG00000020849	Ywhae	6.2714	20.5909	3.2833
ENSMUSG00000020857	Nme2	43.1583	9.43204	0.218545
ENSMUSG00000020859	Spag9	3.71062	12.0294	3.24188
ENSMUSG00000020863	Luc7l3	2.91221	27.2327	9.35118
ENSMUSG00000020864	Ankrd40	12.1531	43.4663	3.57657
ENSMUSG00000020868	Xylt2	3.84258	13.0965	3.40826
ENSMUSG00000020869	Lrrc59	4.31127	18.1372	4.20692
ENSMUSG00000020873	Slc35b1	9.6089	7.39371	0.769464
ENSMUSG00000020876	Snx11	3.10292	9.74154	3.13947
ENSMUSG00000020877	Scrn2	5.19143	26.8341	5.16893
ENSMUSG00000020878	Lrrc46	3.61336	7.46614	2.06626
ENSMUSG00000020883	Fbxl20	3.5079	15.6888	4.47243
ENSMUSG00000020884	Asgr1	9.61458	24.3255	2.53007
ENSMUSG00000020888	Dvl2	10.8785	11.8672	1.09088
ENSMUSG00000020893	Per1	8.33984	8.76283	1.05072
ENSMUSG00000020895	Tmem107	13.7273	8.70983	0.63449
ENSMUSG00000020898	Ctc1	3.45834	32.566	9.41664
ENSMUSG00000020901	Pik3r5	8.53389	6.89862	0.808379
ENSMUSG00000020903	Stx8	3.17758	8.68378	2.73283
ENSMUSG00000020910	Adprm	4.43092	15.063	3.39951
ENSMUSG00000020917	Acly	5.44366	16.4989	3.03085
ENSMUSG00000020918	Kat2a	3.66649	19.7184	5.37799
ENSMUSG00000020919	Stat5b	3.17976	12.8398	4.03797
ENSMUSG00000020921	Tmem101	5.53687	11.774	2.12647
ENSMUSG00000020923	Ubtf	5.59678	16.7902	2.99998
ENSMUSG00000020926	Adam11	8.12855	20.0192	2.46282
ENSMUSG00000020929	Eftud2	4.18487	11.213	2.67942
ENSMUSG00000020935	Dcakd	3.79914	12.238	3.22125
ENSMUSG00000020936	Nmt1	3.36546	14.4775	4.30178
ENSMUSG00000020941	Map3k14	4.80034	9.55699	1.9909
ENSMUSG00000020946	Gosr2	5.99237	10.729	1.79045
ENSMUSG00000020948	Klhl28	3.76875	28.7476	7.62789
ENSMUSG00000020949	Fkbp3	11.9251	23.2023	1.94567
ENSMUSG00000020952	Scfd1	2.75517	10.6901	3.88001
ENSMUSG00000020954	Strn3	3.17288	32.8417	10.3508
ENSMUSG00000020955	Ap4s1	9.47355	20.5768	2.17202
ENSMUSG00000020961	Ston2	1.90146	18.6503	9.80839
ENSMUSG00000020964	Sel1l	5.68743	43.9037	7.71943
ENSMUSG00000020973	Dnaaf2	8.86957	17.9218	2.0206
ENSMUSG00000020974	Pole2	1.39122	6.34683	4.56205
ENSMUSG00000020978	Klhdc2	4.19274	40.2731	9.60544
ENSMUSG00000020982	Nemf	2.6655	7.98966	2.99744
ENSMUSG00000020993	Trappc6b	14.3795	25.0377	1.74121
ENSMUSG00000020994	Pnn	4.3118	17.4493	4.04686
ENSMUSG00000021000	Ctage5	5.56654	12.0245	2.16013
ENSMUSG00000021009	Ptpn21	3.44748	11.4626	3.32492
ENSMUSG00000021012	Zc3h14	3.30318	10.537	3.18996
ENSMUSG00000021013	Ttc8	15.7318	11.2189	0.713139
ENSMUSG00000021018	Polr2h	4.59752	13.2229	2.87609
ENSMUSG00000021022	Ppp2r3c	12.143	25.4711	2.0976
ENSMUSG00000021023	1110008L16Rik	2.5135	15.8092	6.28971
ENSMUSG00000021024	Psma6	5.51808	13.7541	2.49255
ENSMUSG00000021027	Ralgapa1	1.81226	10.9336	6.03315
ENSMUSG00000021028	Mbip	3.09195	8.05044	2.60368
ENSMUSG00000021033	Gstz1	9.73387	11.0795	1.13824
ENSMUSG00000021036	Sptlc2	3.15946	15.312	4.84639
ENSMUSG00000021037	Ahsa1	4.35654	27.4422	6.29909
ENSMUSG00000021038	Vipas39	2.11162	19.7564	9.35603
ENSMUSG00000021040	Slirp	5.2947	6.95597	1.31376
ENSMUSG00000021044	Adck1	1.94571	13.812	7.09867
ENSMUSG00000021051	Ppp2r5e	1.90464	25.2768	13.2711
ENSMUSG00000021054	Sgpp1	7.61548	9.53834	1.25249
ENSMUSG00000021065	Fut8	0.983132	8.06751	8.20593
ENSMUSG00000021067	Sav1	3.62692	19.9093	5.48933
ENSMUSG00000021068	Nin	2.16915	8.04501	3.70884
ENSMUSG00000021076	Actr10	5.06932	24.8618	4.90436
ENSMUSG00000021079	Timm9	2.4907	12.1174	4.86506
ENSMUSG00000021087	Rtn1	1.7701	3.26098	1.84226
ENSMUSG00000021091	Serpina3n	23.5856	23.9714	1.01636
ENSMUSG00000021094	Dhrs7	35.7421	23.5854	0.659878
ENSMUSG00000021096	Ppm1a	48.5297	27.9653	0.576252
ENSMUSG00000021103	Mnat1	3.62203	42.2669	11.6694
ENSMUSG00000021108	Prkch	1.27677	2.1118	1.65402
ENSMUSG00000021111	Papola	3.31727	43.4847	13.1086
ENSMUSG00000021112	Mpp5	2.28412	20.4769	8.96491
ENSMUSG00000021113	Snapc1	2.9212	30.3605	10.3932
ENSMUSG00000021114	Atp6v1d	4.27804	14.515	3.3929
ENSMUSG00000021115	Vrk1	3.44594	9.31848	2.70419
ENSMUSG00000021116	Eif2s1	3.65892	47.5186	12.987
ENSMUSG00000021120	Pigh	9.75302	45.2377	4.63833
ENSMUSG00000021124	Vti1b	8.50379	9.7061	1.14139
ENSMUSG00000021131	Erh	6.98075	48.0846	6.88817
ENSMUSG00000021133	Susd6	2.4162	14.9877	6.20299
ENSMUSG00000021135	Slc10a1	11.236	10.9923	0.978314
ENSMUSG00000021136	Smoc1	5.58963	25.5174	4.56513
ENSMUSG00000021139	Gm20498	9.23459	9.58971	1.03846
ENSMUSG00000021140	Pcnx	5.10447	7.51502	1.47224
ENSMUSG00000021143	Pacs2	2.23256	9.52046	4.26437
ENSMUSG00000021144	Mta1	15.238	22.5735	1.4814
ENSMUSG00000021147	Wdr37	2.97859	26.9754	9.05643
ENSMUSG00000021156	Zmynd11	5.43625	16.2051	2.98093
ENSMUSG00000021171	Esyt2	18.122	44.602	2.46121
ENSMUSG00000021177	Tdp1	2.73909	12.5221	4.57164
ENSMUSG00000021178	Psmc1	6.67772	15.6667	2.34612
ENSMUSG00000021179	Nrde2	2.48389	15.7077	6.32382
ENSMUSG00000021180	Rps6ka5	1.50454	8.32331	5.53212
ENSMUSG00000021185	9030617O03Rik	5.14068	36.017	7.00628
ENSMUSG00000021186	Fbln5	28.8762	17.8186	0.61707
ENSMUSG00000021188	Trip11	1.97395	20.4906	10.3805
ENSMUSG00000021189	Atxn3	3.27294	49.7815	15.2101
ENSMUSG00000021190	Lgmn	6.88573	15.2783	2.21883
ENSMUSG00000021192	Golga5	3.74511	17.1307	4.57415
ENSMUSG00000021193	Pitrm1	35.8262	19.8512	0.554096
ENSMUSG00000021196	Pfkp	6.77312	15.6573	2.31168
ENSMUSG00000021200	Asb2	2.42646	5.78571	2.38443
ENSMUSG00000021209	Ppp4r4	3.95922	19.4446	4.91121
ENSMUSG00000021210	Akr1c6	13.7555	13.3042	0.967187
ENSMUSG00000021211	Akr1c12	13.1776	19.131	1.45179
ENSMUSG00000021218	Gdi2	11.2582	13.9942	1.24303
ENSMUSG00000021221	Dpf3	1.79241	9.95908	5.55626
ENSMUSG00000021222	Dcaf4	4.49302	16.3388	3.63648
ENSMUSG00000021224	Numb	1.3448	10.8798	8.09026
ENSMUSG00000021235	Coq6	8.61176	12.5464	1.45689
ENSMUSG00000021240	Abcd4	4.54778	8.85279	1.94662
ENSMUSG00000021241	Isca2	25.4283	17.383	0.68361
ENSMUSG00000021243	Fcf1	4.89943	10.2653	2.09519
ENSMUSG00000021244	Ylpm1	1.82839	22.6314	12.3778
ENSMUSG00000021245	Mlh3	2.37584	13.2293	5.56826
ENSMUSG00000021248	Tmed10	10.6108	11.282	1.06326
ENSMUSG00000021252	0610007P14Rik	5.44516	12.7572	2.34285
ENSMUSG00000021254	Gpatch2l	2.47536	22.5595	9.1136
ENSMUSG00000021256	Vash1	5.1757	9.885	1.90989
ENSMUSG00000021257	Angel1	6.06579	28.6178	4.7179
ENSMUSG00000021258	Ccnk	4.77047	19.1536	4.01504
ENSMUSG00000021259	Cyp46a1	11.1487	5.29584	0.475018
ENSMUSG00000021262	Evl	2.7111	8.33426	3.07412
ENSMUSG00000021263	Degs2	3.15299	13.9292	4.41776
ENSMUSG00000021266	Wars	2.38842	10.4781	4.38706
ENSMUSG00000021271	Zfp839	3.5433	31.0257	8.75616
ENSMUSG00000021273	Fdft1	2.69977	10.4898	3.88543
ENSMUSG00000021275	Tecpr2	1.96166	15.3071	7.80315
ENSMUSG00000021277	Traf3	5.0071	7.00032	1.39808
ENSMUSG00000021279	Cdc42bpb	2.0617	9.61148	4.66192
ENSMUSG00000021282	Eif5	4.89578	26.2427	5.36027
ENSMUSG00000021285	Ppp1r13b	1.68479	24.2529	14.3951
ENSMUSG00000021286	Zfyve21	2.36881	12.2012	5.15077
ENSMUSG00000021287	Xrcc3	3.02236	6.76191	2.2373
ENSMUSG00000021288	Klc1	3.21082	10.2123	3.18059
ENSMUSG00000021290	2010107E04Rik	7.77527	5.83477	0.750427
ENSMUSG00000021302	Ggps1	3.52237	12.1451	3.44801
ENSMUSG00000021306	Gpr137b	3.98259	6.04442	1.51771
ENSMUSG00000021311	Mtr	2.46147	11.0472	4.48805
ENSMUSG00000021322	Aoah	4.70625	15.3568	3.26306
ENSMUSG00000021326	Trim27	3.34681	31.4616	9.40048
ENSMUSG00000021327	Zkscan3	2.94284	24.3792	8.28425
ENSMUSG00000021335	Slc17a1	8.01716	6.07553	0.757816
ENSMUSG00000021357	Exoc2	1.84479	13.034	7.06532
ENSMUSG00000021360	Gcnt2	4.10594	21.2505	5.17555
ENSMUSG00000021361	Tmem14c	10.1477	11.227	1.10635
ENSMUSG00000021365	Nedd9	15.4603	6.85094	0.443132
ENSMUSG00000021366	Hivep1	2.48302	9.58408	3.85984
ENSMUSG00000021368	Tbc1d7	3.59812	11.0626	3.07454
ENSMUSG00000021371	Mcur1	7.45837	34.6741	4.64902
ENSMUSG00000021375	Kif13a	3.37326	8.09606	2.40007
ENSMUSG00000021376	Tpmt	5.98278	18.5571	3.10175
ENSMUSG00000021377	Dek	7.10178	10.1845	1.43407
ENSMUSG00000021379	Id4	5.79264	6.12534	1.05744
ENSMUSG00000021385	Ippk	1.99712	17.337	8.68103
ENSMUSG00000021390	Ogn	13.2915	12.0296	0.905065
ENSMUSG00000021391	Cenpp	2.29342	7.81615	3.40808
ENSMUSG00000021392	Nol8	4.57563	23.0094	5.02868
ENSMUSG00000021400	Wrnip1	3.35588	46.3205	13.8028
ENSMUSG00000021408	Ripk1	1.98683	25.9649	13.0685
ENSMUSG00000021411	Pxdc1	2.63463	17.9321	6.8063
ENSMUSG00000021413	Prpf4b	3.05177	28.0152	9.17998
ENSMUSG00000021418	Rpp40	3.13493	35.5233	11.3315
ENSMUSG00000021420	Fars2	9.6886	11.7085	1.20848
ENSMUSG00000021423	Ly86	5.58561	12.9648	2.3211
ENSMUSG00000021427	Ssr1	10.2745	25.3445	2.46674
ENSMUSG00000021428	Riok1	2.33827	11.1521	4.76937
ENSMUSG00000021431	Snrnp48	5.46535	11.4066	2.08707
ENSMUSG00000021432	Slc35b3	2.62051	12.0887	4.61313
ENSMUSG00000021453	Gadd45g	3.89876	15.5789	3.99587
ENSMUSG00000021457	Syk	1.84494	5.69044	3.08434
ENSMUSG00000021458	2010111I01Rik	1.99389	6.05396	3.03626
ENSMUSG00000021461	Fancc	4.9232	18.9936	3.85797
ENSMUSG00000021468	Sptlc1	4.08863	22.3634	5.46965
ENSMUSG00000021470	Ercc6l2	2.7434	19.0476	6.94304
ENSMUSG00000021474	Sfxn1	3.9237	36.9413	9.41492
ENSMUSG00000021476	Habp4	17.7713	38.7245	2.17904
ENSMUSG00000021477	Ctsl	13.6247	32.1913	2.36273
ENSMUSG00000021481	Zfp346	5.77155	36.3076	6.29078
ENSMUSG00000021483	Cdk20	2.46819	20.3826	8.25813
ENSMUSG00000021484	Lman2	8.849	14.8475	1.67787
ENSMUSG00000021486	Prelid1	17.2511	23.9732	1.38966
ENSMUSG00000021488	Nsd1	2.97144	18.1504	6.10826
ENSMUSG00000021493	Pdlim7	6.72891	14.3907	2.13864
ENSMUSG00000021494	Ddx41	17.8416	20.6457	1.15717
ENSMUSG00000021495	Fam193b	3.02275	7.97794	2.63929
ENSMUSG00000021497	Txndc15	10.0088	36.7412	3.67087
ENSMUSG00000021500	Ddx46	4.1013	11.7767	2.87145
ENSMUSG00000021501	Caml	3.78283	25.3522	6.70191
ENSMUSG00000021504	B4galt7	2.74924	6.20818	2.25814
ENSMUSG00000021509	Slc25a48	4.30562	11.0129	2.5578
ENSMUSG00000021518	Ptdss1	10.281	10.7883	1.04934
ENSMUSG00000021519	Mterf3	2.67087	15.8827	5.94662
ENSMUSG00000021520	Uqcrb	12.2005	10.1175	0.829273
ENSMUSG00000021532	Fastkd3	6.25268	19.1787	3.06728
ENSMUSG00000021537	Cetn3	9.90088	13.302	1.34351
ENSMUSG00000021540	Smad5	3.25633	11.6037	3.56341
ENSMUSG00000021546	Hnrnpk	5.88046	46.1514	7.84827
ENSMUSG00000021548	Ccnh	6.74701	24.4186	3.61917
ENSMUSG00000021549	Rasa1	2.63661	14.4869	5.49451
ENSMUSG00000021550	2210016F16Rik	5.83878	17.7657	3.04271
ENSMUSG00000021552	Gkap1	6.13239	14.8252	2.41753
ENSMUSG00000021555	Naa35	3.20701	24.489	7.6361
ENSMUSG00000021556	Golm1	9.28945	15.9838	1.72064
ENSMUSG00000021557	Agtpbp1	5.16006	8.56939	1.66072
ENSMUSG00000021559	Dapk1	1.20008	31.2752	26.0608
ENSMUSG00000021573	Tppp	4.15501	9.17412	2.20797
ENSMUSG00000021576	Pdcd6	5.13732	7.54263	1.4682
ENSMUSG00000021577	Sdha	23.872	27.3556	1.14593
ENSMUSG00000021578	Ccdc127	5.19138	16.1169	3.10456
ENSMUSG00000021579	Lrrc14b	9.31817	8.28778	0.889421
ENSMUSG00000021583	Erap1	19.5756	23.914	1.22162
ENSMUSG00000021585	Cast	3.62391	14.2109	3.92143
ENSMUSG00000021589	Rhobtb3	6.67313	19.7749	2.96337
ENSMUSG00000021591	Glrx	5.38233	15.2429	2.83202
ENSMUSG00000021592	Arsk	6.69616	13.2551	1.9795
ENSMUSG00000021595	Nsun2	5.1976	20.7832	3.99861
ENSMUSG00000021597	Ankrd32	1.87391	9.48055	5.05923
ENSMUSG00000021598	Med10	23.9842	28.6784	1.19572
ENSMUSG00000021607	Mrpl36	3.33164	11.5955	3.48041
ENSMUSG00000021608	Lpcat1	5.33372	7.48482	1.4033
ENSMUSG00000021611	Tert	3.59736	14.9438	4.1541
ENSMUSG00000021615	Xrcc4	3.85369	7.61991	1.9773
ENSMUSG00000021619	Atg10	8.31677	5.83665	0.701793
ENSMUSG00000021621	Zcchc9	8.29345	16.5598	1.99673
ENSMUSG00000021624	Cd180	1.85521	5.97469	3.22049
ENSMUSG00000021629	Slc30a5	4.17764	25.0599	5.99859
ENSMUSG00000021635	Rad17	2.33504	20.5158	8.78606
ENSMUSG00000021636	Marveld2	4.91309	24.2238	4.93047
ENSMUSG00000021638	Ocln	2.97806	35.3955	11.8854
ENSMUSG00000021639	Gtf2h2	3.1338	15.4712	4.93687
ENSMUSG00000021640	Naip1	1.74338	4.45629	2.55612
ENSMUSG00000021643	Serf1	14.259	14.3309	1.00504
ENSMUSG00000021645	Smn1	2.39926	11.7262	4.88742
ENSMUSG00000021646	Mccc2	29.1688	26.7847	0.918265
ENSMUSG00000021650	Ptcd2	2.70409	12.6781	4.68848
ENSMUSG00000021660	Btf3	20.9861	22.0347	1.04997
ENSMUSG00000021661	Ankra2	4.37172	46.4214	10.6186
ENSMUSG00000021668	Polk	3.90864	17.8877	4.57646
ENSMUSG00000021669	Col4a3bp	2.76355	19.6989	7.12813
ENSMUSG00000021670	Hmgcr	6.50432	16.9916	2.61235
ENSMUSG00000021671	Poc5	2.78987	10.2314	3.66733
ENSMUSG00000021676	Iqgap2	9.24682	20.9454	2.26515
ENSMUSG00000021681	Aggf1	4.64335	38.1494	8.21593
ENSMUSG00000021686	Ap3b1	2.65837	20.1135	7.56609
ENSMUSG00000021687	Scamp1	8.78735	16.2699	1.85151
ENSMUSG00000021690	Jmy	2.75218	23.7257	8.62071
ENSMUSG00000021693	Kif2a	2.89464	24.1129	8.33019
ENSMUSG00000021694	Ercc8	2.09261	9.38909	4.48678
ENSMUSG00000021699	Pde4d	1.93225	25.4532	13.1728
ENSMUSG00000021703	Serinc5	8.03616	41.4219	5.15444
ENSMUSG00000021706	Zfyve16	2.72966	22.5492	8.26081
ENSMUSG00000021709	Erbb2ip	2.52984	18.4343	7.28674
ENSMUSG00000021710	Nln	10.016	20.4904	2.04576
ENSMUSG00000021711	Trappc13	2.63719	27.1949	10.3121
ENSMUSG00000021712	Trim23	3.26288	22.3593	6.85261
ENSMUSG00000021714	Cenpk	5.79575	9.98939	1.72357
ENSMUSG00000021715	Cwc27	1.97461	14.5406	7.36379
ENSMUSG00000021716	Srek1ip1	3.40626	23.1855	6.80673
ENSMUSG00000021719	Rgs7bp	1.76693	13.0008	7.35787
ENSMUSG00000021725	Parp8	3.20275	5.3684	1.67619
ENSMUSG00000021737	Psmd6	3.70852	20.6933	5.57993
ENSMUSG00000021738	Atxn7	2.90431	19.1455	6.59211
ENSMUSG00000021745	Ptprg	13.0398	31.3206	2.40192
ENSMUSG00000021751	Acox2	2.83426	22.6048	7.97556
ENSMUSG00000021752	Kctd6	2.46881	8.50883	3.44654
ENSMUSG00000021754	Map3k1	4.41413	16.1559	3.66005
ENSMUSG00000021756	Il6st	4.45654	15.4769	3.47284
ENSMUSG00000021759	Ppap2a	1.54433	4.81869	3.12025
ENSMUSG00000021760	Gpx8	5.35815	10.1656	1.89721
ENSMUSG00000021764	Ndufs4	9.90307	14.4016	1.45426
ENSMUSG00000021767	Kat6b	1.23856	13.5894	10.9719
ENSMUSG00000021770	Samd8	3.50003	47.1105	13.46
ENSMUSG00000021771	Vdac2	9.25244	29.2685	3.16332
ENSMUSG00000021772	Nkiras1	5.63466	13.0044	2.30793
ENSMUSG00000021773	Comtd1	23.0384	22.7487	0.987425
ENSMUSG00000021774	Ube2e1	4.43467	17.3623	3.91514
ENSMUSG00000021775	Nr1d2	5.46211	22.4689	4.11358
ENSMUSG00000021779	Thrb	1.20019	14.2077	11.8379
ENSMUSG00000021782	Dlg5	1.80617	14.4259	7.98705
ENSMUSG00000021785	Ngly1	2.83836	20.8387	7.34184
ENSMUSG00000021796	Bmpr1a	1.76446	14.0077	7.93877
ENSMUSG00000021807	2700060E02Rik	10.405	12.7067	1.22122
ENSMUSG00000021809	Nudt13	5.98236	11.6131	1.94123
ENSMUSG00000021810	Ecd	2.08023	27.5972	13.2664
ENSMUSG00000021811	Dnajc9	3.6474	18.6632	5.11685
ENSMUSG00000021814	Anxa7	8.86153	13.2923	1.5
ENSMUSG00000021816	Ppp3cb	14.7185	30.0169	2.0394
ENSMUSG00000021819	Zswim8	7.12767	20.3797	2.85923
ENSMUSG00000021820	Camk2g	3.36308	8.88401	2.64163
ENSMUSG00000021824	Ap3m1	4.21103	16.5854	3.93856
ENSMUSG00000021830	Txndc16	9.26036	15.9737	1.72496
ENSMUSG00000021831	Ero1l	31.4074	18.8751	0.600975
ENSMUSG00000021832	Psmc6	2.89613	12.9489	4.4711
ENSMUSG00000021835	Bmp4	8.37566	7.87629	0.940378
ENSMUSG00000021838	Samd4	2.69646	10.258	3.80424
ENSMUSG00000021843	Ktn1	3.17421	10.7236	3.37836
ENSMUSG00000021846	Peli2	6.10994	15.4755	2.53284
ENSMUSG00000021866	Anxa11	4.16215	19.9492	4.793
ENSMUSG00000021870	Slmap	2.59865	11.654	4.48464
ENSMUSG00000021871	Pnp	5.06805	11.4422	2.25772
ENSMUSG00000021876	Rnase4	22.1713	16.5806	0.747839
ENSMUSG00000021877	Arf4	14.5112	31.1403	2.14594
ENSMUSG00000021886	Gpr65	2.81244	4.29872	1.52846
ENSMUSG00000021891	Mettl6	3.20435	13.8201	4.31293
ENSMUSG00000021892	Sh3bp5	1.65393	7.65754	4.62992
ENSMUSG00000021893	Capn7	4.74507	12.1139	2.55294
ENSMUSG00000021895	Arhgef3	2.66753	11.9857	4.4932
ENSMUSG00000021900	Btd	4.41808	34.1912	7.73893
ENSMUSG00000021901	Bap1	5.85947	26.2428	4.4787
ENSMUSG00000021902	Phf7	4.27883	13.1174	3.06565
ENSMUSG00000021903	Galnt15	1.74785	5.51143	3.15326
ENSMUSG00000021905	Dph3	11.8474	14.4275	1.21778
ENSMUSG00000021906	Oxnad1	4.40369	26.5027	6.01828
ENSMUSG00000021908	Gm6768	6.92202	37.3119	5.39032
ENSMUSG00000021910	Nisch	8.49015	18.4537	2.17354
ENSMUSG00000021911	Parg	2.10058	15.4784	7.36863
ENSMUSG00000021916	Glt8d1	4.05832	10.9492	2.69795
ENSMUSG00000021917	Spcs1	12.1554	13.2237	1.08788
ENSMUSG00000021929	Kpna3	2.19274	11.9081	5.43069
ENSMUSG00000021930	Spryd7	8.33331	25.402	3.04825
ENSMUSG00000021932	Rnaseh2b	5.99431	5.6659	0.945213
ENSMUSG00000021936	Mapk8	3.03356	13.3087	4.38717
ENSMUSG00000021938	Pspc1	5.20455	18.9462	3.64031
ENSMUSG00000021943	Gdf10	8.26938	6.7201	0.812648
ENSMUSG00000021944	Gata4	2.34798	3.76083	1.60173
ENSMUSG00000021945	Zmym2	1.34362	7.75073	5.76853
ENSMUSG00000021948	Prkcd	4.87049	11.5022	2.36161
ENSMUSG00000021951	N6amt2	2.45662	19.6786	8.01042
ENSMUSG00000021952	Xpo4	2.16077	20.8041	9.6281
ENSMUSG00000021957	Tkt	8.80245	11.1361	1.26511
ENSMUSG00000021958	Pinx1	2.19989	9.08737	4.13083
ENSMUSG00000021959	Lats2	3.5971	15.3163	4.25796
ENSMUSG00000021962	Dcp1a	2.74414	9.38922	3.42155
ENSMUSG00000021963	Sap18	12.9101	49.55	3.83807
ENSMUSG00000021967	Mrpl57	11.6331	17.5653	1.50994
ENSMUSG00000021969	Zdhhc20	14.8557	14.6872	0.988663
ENSMUSG00000021972	Hmbox1	3.07548	10.1385	3.29657
ENSMUSG00000021973	Micu2	14.0673	26.8676	1.90993
ENSMUSG00000021975	Ints9	1.90844	8.63441	4.52433
ENSMUSG00000021978	Extl3	2.13932	10.8216	5.05844
ENSMUSG00000021981	Cab39l	6.13526	28.8313	4.69929
ENSMUSG00000021982	Cdadc1	7.58238	14.8721	1.9614
ENSMUSG00000021987	Mtmr6	3.48921	24.3553	6.98017
ENSMUSG00000021990	Spata13	0.913076	10.5288	11.5311
ENSMUSG00000021996	Esd	10.8656	23.7449	2.18534
ENSMUSG00000021998	Lcp1	6.56197	11.72	1.78606
ENSMUSG00000022000	Zc3h13	3.35869	22.5871	6.72497
ENSMUSG00000022008	Gpalpp1	2.60172	28.6805	11.0237
ENSMUSG00000022009	Nufip1	3.26336	15.6537	4.7968
ENSMUSG00000022013	Dnajc15	6.21957	8.20964	1.31997
ENSMUSG00000022014	Epsti1	2.41815	5.81628	2.40526
ENSMUSG00000022018	Rgcc	11.8321	29.8305	2.52115
ENSMUSG00000022019	Tdrd3	4.10305	23.7014	5.77654
ENSMUSG00000022020	Naa16	2.06289	16.2342	7.86965
ENSMUSG00000022022	Mtrf1	2.16054	16.7612	7.75789
ENSMUSG00000022023	Wbp4	5.49966	23.9578	4.35624
ENSMUSG00000022024	Sugt1	4.66671	15.5514	3.33242
ENSMUSG00000022031	Elp3	2.54544	21.6499	8.50537
ENSMUSG00000022035	Ccdc25	3.43568	14.2007	4.13329
ENSMUSG00000022040	Ephx2	6.94612	36.919	5.31506
ENSMUSG00000022043	Trim35	4.87643	28.072	5.75667
ENSMUSG00000022048	Dpysl2	3.58309	8.47239	2.36455
ENSMUSG00000022051	Bnip3l	5.19505	12.0326	2.31617
ENSMUSG00000022052	Ppp2r2a	2.76881	19.6274	7.08873
ENSMUSG00000022064	Pibf1	1.52045	7.28765	4.79309
ENSMUSG00000022070	Bora	3.40004	9.63263	2.83309
ENSMUSG00000022075	Rhobtb2	3.27782	13.4587	4.10599
ENSMUSG00000022089	Bin3	2.79359	10.1363	3.62842
ENSMUSG00000022090	Pdlim2	7.02238	7.15598	1.01903
ENSMUSG00000022091	Sorbs3	3.25008	14.5818	4.48659
ENSMUSG00000022095	Fam160b2	4.58511	16.6003	3.62048
ENSMUSG00000022098	Bmp1	5.20505	17.1207	3.28925
ENSMUSG00000022100	Xpo7	1.75345	14.7964	8.43844
ENSMUSG00000022102	Dok2	3.78319	9.32168	2.46398
ENSMUSG00000022105	Rb1	2.51069	7.80174	3.10741
ENSMUSG00000022106	Rcbtb2	3.60696	11.0536	3.06451
ENSMUSG00000022108	Itm2b	30.9174	13.4773	0.435911
ENSMUSG00000022109	Med4	3.31422	12.2631	3.70016
ENSMUSG00000022110	Sucla2	13.3896	13.0345	0.973474
ENSMUSG00000022111	Uchl3	9.53608	15.621	1.63809
ENSMUSG00000022114	Spry2	7.66113	8.72604	1.139
ENSMUSG00000022119	Rbm26	2.3922	11.5616	4.83301
ENSMUSG00000022120	Rnf219	2.83612	8.83851	3.11641
ENSMUSG00000022122	Ednrb	9.63576	9.37126	0.97255
ENSMUSG00000022130	Tgds	3.97159	18.9202	4.76388
ENSMUSG00000022131	Gpr180	8.17648	16.4157	2.00767
ENSMUSG00000022136	Dnajc3	10.2329	17.7011	1.72982
ENSMUSG00000022139	Mbnl2	3.58017	14.1271	3.94594
ENSMUSG00000022141	Nipbl	1.41058	10.7253	7.60347
ENSMUSG00000022142	Nup155	3.03171	23.1411	7.63304
[truncated: 7,179 more rows]
