# Supplementary material for: The CCR4–NOT complex maintains liver homeostasis through mRNA deadenylation
Source: Life Sci Alliance. 2020 Apr 1;3(5):e201900494. doi: 10.26508/lsa.201900494 (PMC7119370; doi:10.26508/lsa.201900494)
Supplement: Supplementary file 8 [file LSA-2019-00494_TableS8.xlsx]

## Sheet: Sheet1
Table S8. AGO2-RIP enrichment values. AGO2 RIP enrichment value was calculated by normalizing Gene FPKMs in AGO2 immunoprecipitates of liver lysates from control mice with Gene FPKMs in total liver lysates (input) (average of three experiments). Ensemble gene IDs and gene symbols are also shown.
AGO2 RIP enrichment values in livers from control mice
Ensembl ID	Gene Symbol	AGO2 RIP enrichment value
ENSMUSG00000000001	Gnai3	1.30545
ENSMUSG00000000028	Cdc45	1.58946
ENSMUSG00000000049	Apoh	0.365626
ENSMUSG00000000056	Narf	2.67971
ENSMUSG00000000058	Cav2	3.82945
ENSMUSG00000000078	Klf6	1.90411
ENSMUSG00000000085	Scmh1	1.90373
ENSMUSG00000000088	Cox5a	1.28314
ENSMUSG00000000093	Tbx2	2.77598
ENSMUSG00000000120	Ngfr	1.19129
ENSMUSG00000000127	Fer	0.595195
ENSMUSG00000000131	Xpo6	3.03124
ENSMUSG00000000134	Tfe3	1.21832
ENSMUSG00000000142	Axin2	2.28731
ENSMUSG00000000148	Brat1	1.50408
ENSMUSG00000000149	Gna12	2.68899
ENSMUSG00000000154	Slc22a18	0.49521
ENSMUSG00000000159	Igsf5	0.623153
ENSMUSG00000000168	Dlat	1.34714
ENSMUSG00000000171	Sdhd	0.331052
ENSMUSG00000000184	Ccnd2	3.2082
ENSMUSG00000000194	Gpr107	2.12127
ENSMUSG00000000247	Lhx2	1.69457
ENSMUSG00000000253	Gmpr	2.54386
ENSMUSG00000000266	Mid2	3.26762
ENSMUSG00000000275	Trim25	1.50013
ENSMUSG00000000276	Dgke	3.09954
ENSMUSG00000000278	Scpep1	0.520067
ENSMUSG00000000282	Mnt	4.63896
ENSMUSG00000000290	Itgb2	0.852741
ENSMUSG00000000295	Hddc2	0.740207
ENSMUSG00000000296	Tpd52l1	0.228919
ENSMUSG00000000301	Pemt	0.490667
ENSMUSG00000000303	Cdh1	0.704268
ENSMUSG00000000317	Bcl6b	2.0011
ENSMUSG00000000318	Clec10a	1.29578
ENSMUSG00000000325	Arvcf	0.363936
ENSMUSG00000000326	Comt	0.296076
ENSMUSG00000000339	Rtca	1.53018
ENSMUSG00000000340	Dbt	0.451075
ENSMUSG00000000346	Dazap2	0.592673
ENSMUSG00000000355	Mcts1	0.653495
ENSMUSG00000000374	Trappc10	3.41282
ENSMUSG00000000378	Ccm2	1.28917
ENSMUSG00000000384	Tbrg4	0.975463
ENSMUSG00000000385	Tmprss2	3.62214
ENSMUSG00000000386	Mx1	2.91477
ENSMUSG00000000399	Ndufa9	0.325026
ENSMUSG00000000409	Lck	1.12787
ENSMUSG00000000420	Galnt1	1.61077
ENSMUSG00000000439	Mkrn2	3.25209
ENSMUSG00000000440	Pparg	0.792247
ENSMUSG00000000441	Raf1	0.68753
ENSMUSG00000000486	43344	1.15554
ENSMUSG00000000530	Acvrl1	0.648928
ENSMUSG00000000531	Grasp	1.11131
ENSMUSG00000000532	Acvr1b	3.01411
ENSMUSG00000000538	Tom1l2	2.78841
ENSMUSG00000000552	Zfp385a	1.58863
ENSMUSG00000000555	Itga5	5.52083
ENSMUSG00000000560	Gabra2	1.33141
ENSMUSG00000000561	Wdr77	1.3908
ENSMUSG00000000563	Atp5f1	0.286144
ENSMUSG00000000567	Sox9	1.22402
ENSMUSG00000000568	Hnrnpd	0.853182
ENSMUSG00000000579	Dynlt1c	1.82417
ENSMUSG00000000581	C1d	0.55672
ENSMUSG00000000594	Gm2a	0.23488
ENSMUSG00000000600	Krit1	2.69675
ENSMUSG00000000605	Clcn4-2	2.02565
ENSMUSG00000000628	Hk2	1.40519
ENSMUSG00000000631	Myo18a	1.11594
ENSMUSG00000000673	Haao	0.589044
ENSMUSG00000000682	Cd52	0.571572
ENSMUSG00000000686	Abhd15	0.532269
ENSMUSG00000000693	Loxl3	1.49571
ENSMUSG00000000708	Kat2b	2.24145
ENSMUSG00000000711	Rab5b	1.00554
ENSMUSG00000000738	Spg7	1.08618
ENSMUSG00000000739	Sult5a1	2.65255
ENSMUSG00000000740	Rpl13	0.278026
ENSMUSG00000000743	Chmp1a	1.1008
ENSMUSG00000000751	Rpa1	0.437628
ENSMUSG00000000753	Serpinf1	0.380064
ENSMUSG00000000759	Tubgcp3	1.57796
ENSMUSG00000000776	Polr3d	1.28242
ENSMUSG00000000782	Tcf7	1.11918
ENSMUSG00000000787	Ddx3x	2.74722
ENSMUSG00000000791	Il12rb1	0.922975
ENSMUSG00000000804	Usp32	2.01927
ENSMUSG00000000811	Txnrd3	1.25854
ENSMUSG00000000823	Znf512b	4.39963
ENSMUSG00000000826	Dnajc5	2.42383
ENSMUSG00000000827	Tpd52l2	0.522771
ENSMUSG00000000838	Fmr1	2.00433
ENSMUSG00000000876	Pxmp4	6.79044
ENSMUSG00000000881	Dlg3	1.51305
ENSMUSG00000000884	Gnb1l	0.663605
ENSMUSG00000000902	Smarcb1	1.49893
ENSMUSG00000000915	Hip1r	3.06716
ENSMUSG00000000916	Nsun5	2.00143
ENSMUSG00000000934	Top1mt	0.862938
ENSMUSG00000000948	Gm38393	0.67152
ENSMUSG00000000957	Mmp14	1.24388
ENSMUSG00000000958	Slc7a7	2.41465
ENSMUSG00000000959	Oxa1l	1.13928
ENSMUSG00000000976	Heatr6	3.20697
ENSMUSG00000001016	Ilf2	1.86426
ENSMUSG00000001017	Chtop	0.912357
ENSMUSG00000001018	Snapin	1.98971
ENSMUSG00000001020	S100a4	2.42056
ENSMUSG00000001025	S100a6	0.708546
ENSMUSG00000001029	Icam2	0.535425
ENSMUSG00000001034	Mapk7	3.17326
ENSMUSG00000001036	Epn2	3.04517
ENSMUSG00000001052	Sec24b	1.72892
ENSMUSG00000001053	N4bp3	1.32322
ENSMUSG00000001054	Rmnd5b	2.86056
ENSMUSG00000001056	Nhp2	0.175938
ENSMUSG00000001062	Vps9d1	6.30616
ENSMUSG00000001065	Zfp276	1.34721
ENSMUSG00000001082	Mfsd10	10.8045
ENSMUSG00000001089	Luzp1	2.89863
ENSMUSG00000001095	Slc13a2	2.73489
ENSMUSG00000001098	Kctd10	2.18162
ENSMUSG00000001100	Poldip2	0.878944
ENSMUSG00000001105	Ift20	0.680648
ENSMUSG00000001119	Col6a1	1.79446
ENSMUSG00000001120	Pcbp3	6.49868
ENSMUSG00000001123	Lgals9	1.14087
ENSMUSG00000001127	Araf	3.35908
ENSMUSG00000001128	Cfp	0.920604
ENSMUSG00000001134	Uxt	0.409711
ENSMUSG00000001138	Cnnm3	2.33636
ENSMUSG00000001143	Lman2l	1.20881
ENSMUSG00000001150	Mcm3ap	1.54898
ENSMUSG00000001151	Pcnt	0.656543
ENSMUSG00000001155	Ftcd	2.34827
ENSMUSG00000001156	Mxd1	3.64538
ENSMUSG00000001157	Gmcl1	2.07285
ENSMUSG00000001158	Snrnp27	0.885902
ENSMUSG00000001166	Oas1c	1.83439
ENSMUSG00000001173	Ocrl	2.00092
ENSMUSG00000001175	Calm1	0.521553
ENSMUSG00000001211	Agpat3	0.721725
ENSMUSG00000001227	Sema6b	1.37525
ENSMUSG00000001229	Dpp9	1.19299
ENSMUSG00000001240	Ramp2	0.85414
ENSMUSG00000001247	Lsr	0.814018
ENSMUSG00000001248	Gramd1a	1.49754
ENSMUSG00000001249	Hpn	1.36788
ENSMUSG00000001270	Ckb	0.987027
ENSMUSG00000001280	Sp1	2.21454
ENSMUSG00000001281	Itgb7	1.27136
ENSMUSG00000001285	Myg1	0.886525
ENSMUSG00000001288	Rarg	3.28674
ENSMUSG00000001289	Pfdn5	0.0956049
ENSMUSG00000001300	Efnb2	1.36799
ENSMUSG00000001305	Rrp15	0.285854
ENSMUSG00000001313	Rnd2	0.728441
ENSMUSG00000001323	Srr	0.931781
ENSMUSG00000001333	Sync	1.7786
ENSMUSG00000001348	Acp5	0.331265
ENSMUSG00000001366	Fbxo9	1.41662
ENSMUSG00000001376	Ccdc132	4.39722
ENSMUSG00000001380	Hars	0.484259
ENSMUSG00000001383	Zmat2	0.27076
ENSMUSG00000001403	Ube2c	1.45897
ENSMUSG00000001415	Smg5	1.73127
ENSMUSG00000001416	Cct3	1.105
ENSMUSG00000001418	Glmp	1.17972
ENSMUSG00000001419	Mef2d	4.91093
ENSMUSG00000001424	Snd1	0.549003
ENSMUSG00000001435	Col18a1	1.67266
ENSMUSG00000001436	Slc19a1	2.60617
ENSMUSG00000001440	Kpnb1	1.30762
ENSMUSG00000001441	Npepps	2.71011
ENSMUSG00000001445	Mrpl10	0.704773
ENSMUSG00000001467	Cyp51	1.05524
ENSMUSG00000001472	Tcf25	1.1468
ENSMUSG00000001473	Tubb6	1.00586
ENSMUSG00000001482	Def8	2.30569
ENSMUSG00000001506	Col1a1	1.12053
ENSMUSG00000001507	Itga3	2.50304
ENSMUSG00000001518	Itfg2	1.75989
ENSMUSG00000001521	Tulp3	1.21076
ENSMUSG00000001524	Gtf2h4	1.84911
ENSMUSG00000001525	Tubb5	0.654277
ENSMUSG00000001542	Ell2	4.87401
ENSMUSG00000001552	Jup	1.32275
ENSMUSG00000001569	Nom1	0.874938
ENSMUSG00000001576	Ergic1	1.04099
ENSMUSG00000001588	Acap1	2.55161
ENSMUSG00000001604	Tcea3	0.459935
ENSMUSG00000001627	Ifrd1	2.84575
ENSMUSG00000001630	Stk38l	2.46076
ENSMUSG00000001632	Brpf1	2.72584
ENSMUSG00000001642	Akr1b3	0.706948
ENSMUSG00000001663	Gstt1	0.69985
ENSMUSG00000001665	Gstt3	0.586442
ENSMUSG00000001666	Ddt	0.137268
ENSMUSG00000001670	Tat	1.20705
ENSMUSG00000001674	Ddx18	0.976954
ENSMUSG00000001687	Ubl3	0.929248
ENSMUSG00000001700	Gramd3	7.45343
ENSMUSG00000001707	Eef1e1	0.49931
ENSMUSG00000001729	Akt1	1.47363
ENSMUSG00000001741	Il16	1.77988
ENSMUSG00000001750	Tcirg1	5.34078
ENSMUSG00000001751	Naglu	1.34874
ENSMUSG00000001755	Coasy	0.526755
ENSMUSG00000001761	Smo	1.00199
ENSMUSG00000001763	Tspan33	0.501243
ENSMUSG00000001767	Crnkl1	0.750289
ENSMUSG00000001768	Rin2	1.26903
ENSMUSG00000001774	Chordc1	1.19495
ENSMUSG00000001783	Rtcb	0.585434
ENSMUSG00000001785	Pwp1	1.00049
ENSMUSG00000001786	Fbxo7	0.901192
ENSMUSG00000001794	Capns1	1.74559
ENSMUSG00000001802	Lrp3	1.38458
ENSMUSG00000001829	Clpb	0.575915
ENSMUSG00000001833	43350	0.739717
ENSMUSG00000001844	Zdhhc4	1.6187
ENSMUSG00000001847	Rac1	1.01897
ENSMUSG00000001855	Nup214	1.42323
ENSMUSG00000001870	Ltbp1	0.95931
ENSMUSG00000001891	Ugp2	0.619025
ENSMUSG00000001909	Trmt1	2.25058
ENSMUSG00000001910	Nacc1	2.41533
ENSMUSG00000001911	Nfix	0.652207
ENSMUSG00000001918	Slc1a5	2.8615
ENSMUSG00000001924	Uba1	0.784447
ENSMUSG00000001942	Siae	1.55157
ENSMUSG00000001943	Vsig2	3.41251
ENSMUSG00000001946	Esam	1.35241
ENSMUSG00000001948	Spa17	1.3039
ENSMUSG00000001962	Fam50a	1.05033
ENSMUSG00000001964	Emd	0.777036
ENSMUSG00000001983	Taco1	0.391062
ENSMUSG00000001995	Sipa1l2	2.01917
ENSMUSG00000001998	Ap4e1	1.15353
ENSMUSG00000001999	Blvra	0.396649
ENSMUSG00000002010	Idh3g	3.81919
ENSMUSG00000002014	Ssr4	0.513618
ENSMUSG00000002015	Bcap31	0.510747
ENSMUSG00000002017	Fam98a	1.74537
ENSMUSG00000002028	Kmt2a	2.47803
ENSMUSG00000002031	Ift46	1.22628
ENSMUSG00000002032	Tmem25	2.59234
ENSMUSG00000002043	Trappc6a	0.427156
ENSMUSG00000002052	Supt6	1.57662
ENSMUSG00000002058	Unc119	0.535392
ENSMUSG00000002059	Rab34	0.769888
ENSMUSG00000002064	Sdf2	0.604637
ENSMUSG00000002068	Ccne1	4.15394
ENSMUSG00000002083	Bbc3	4.71544
ENSMUSG00000002102	Psmc3	0.465648
ENSMUSG00000002103	Acp2	1.16738
ENSMUSG00000002105	Slc39a13	1.55907
ENSMUSG00000002107	Celf2	4.74054
ENSMUSG00000002108	Nr1h3	0.525708
ENSMUSG00000002109	Ddb2	4.12651
ENSMUSG00000002111	Spi1	0.762078
ENSMUSG00000002129	Sf3a1	0.998295
ENSMUSG00000002147	Stat6	1.81999
ENSMUSG00000002205	Vrk3	1.16859
ENSMUSG00000002210	Smg9	2.16887
ENSMUSG00000002221	Paxip1	1.70138
ENSMUSG00000002222	Rmnd5a	3.39519
ENSMUSG00000002227	Mov10	7.0283
ENSMUSG00000002233	Rhoc	1.26555
ENSMUSG00000002249	Tead3	2.52695
ENSMUSG00000002250	Ppard	5.68275
ENSMUSG00000002265	Peg3	2.63403
ENSMUSG00000002274	Metrn	0.554062
ENSMUSG00000002279	Lmf1	0.246448
ENSMUSG00000002280	Narfl	1.56812
ENSMUSG00000002289	Angptl4	1.44538
ENSMUSG00000002297	Dbf4	1.99247
ENSMUSG00000002307	Daxx	1.78711
ENSMUSG00000002308	Cd320	1.69736
ENSMUSG00000002319	Ipo4	1.58336
ENSMUSG00000002320	Tm9sf1	0.810831
ENSMUSG00000002324	Rec8	3.82183
ENSMUSG00000002325	Irf9	2.51722
ENSMUSG00000002326	Gmpr2	0.724606
ENSMUSG00000002329	Mdp1	0.562913
ENSMUSG00000002332	Dhrs1	1.06639
ENSMUSG00000002342	Tmem161a	1.38689
ENSMUSG00000002343	Armc6	0.79821
ENSMUSG00000002345	2310045N01Rik	0.251347
ENSMUSG00000002346	Slc25a42	2.77721
ENSMUSG00000002365	Snx9	0.747013
ENSMUSG00000002372	Ranbp3	2.47625
ENSMUSG00000002379	Ndufa11	0.345086
ENSMUSG00000002393	Nr2f6	0.869522
ENSMUSG00000002395	Use1	0.440907
ENSMUSG00000002396	Ocel1	1.19773
ENSMUSG00000002409	Dyrk1b	3.24773
ENSMUSG00000002413	Braf	2.71656
ENSMUSG00000002416	Ndufb2	0.141048
ENSMUSG00000002428	Hltf	1.89827
ENSMUSG00000002455	Prpf6	0.843784
ENSMUSG00000002458	Rgs19	2.21484
ENSMUSG00000002475	Abhd3	0.414115
ENSMUSG00000002477	Snrpd1	0.644131
ENSMUSG00000002486	Tchp	3.9401
ENSMUSG00000002496	Tsc2	2.23812
ENSMUSG00000002504	Slc9a3r2	0.830649
ENSMUSG00000002524	Puf60	0.715858
ENSMUSG00000002546	Golga2	1.34146
ENSMUSG00000002550	Uck1	1.15433
ENSMUSG00000002580	Mien1	0.310371
ENSMUSG00000002588	Pon1	0.456762
ENSMUSG00000002602	Axl	2.37625
ENSMUSG00000002603	Tgfb1	0.735137
ENSMUSG00000002608	Ccdc97	1.79463
ENSMUSG00000002617	Zfp40	4.12375
ENSMUSG00000002625	Akap8l	7.41794
ENSMUSG00000002635	Pdcd2l	0.674904
ENSMUSG00000002658	Gtf2f1	0.657678
ENSMUSG00000002660	Clpp	0.313646
ENSMUSG00000002661	Alkbh7	0.292533
ENSMUSG00000002668	Dennd1c	4.48112
ENSMUSG00000002679	Med6	1.31957
ENSMUSG00000002699	Lcp2	2.36088
ENSMUSG00000002718	Cse1l	0.993896
ENSMUSG00000002728	Naa20	2.5455
ENSMUSG00000002731	Prkra	0.927944
ENSMUSG00000002732	Fkbp7	0.996253
ENSMUSG00000002733	Plekha3	0.817234
ENSMUSG00000002741	Ykt6	1.47744
ENSMUSG00000002748	Baz1b	0.836452
ENSMUSG00000002763	Pex6	2.99793
ENSMUSG00000002767	Mrpl2	0.289482
ENSMUSG00000002768	Mea1	0.207189
ENSMUSG00000002769	Gnmt	0.285998
ENSMUSG00000002778	Kdelr1	1.2333
ENSMUSG00000002781	Tmem143	2.08908
ENSMUSG00000002797	Ggct	0.54342
ENSMUSG00000002803	Btbd6	0.783386
ENSMUSG00000002804	Nudt14	0.196148
ENSMUSG00000002812	Flii	1.58388
ENSMUSG00000002814	Top3a	1.41788
ENSMUSG00000002820	Atg4d	1.5369
ENSMUSG00000002825	Qtrt1	1.33289
ENSMUSG00000002831	Plin4	3.68665
ENSMUSG00000002833	Hdgfrp2	3.01113
ENSMUSG00000002844	Adprh	0.581098
ENSMUSG00000002845	Tmem39a	2.361
ENSMUSG00000002846	Timmdc1	0.449104
ENSMUSG00000002847	Pla1a	0.706343
ENSMUSG00000002871	Tpra1	2.75919
ENSMUSG00000002881	Nab1	1.126
ENSMUSG00000002885	Adgre5	2.2078
ENSMUSG00000002897	Il17ra	1.22002
ENSMUSG00000002900	Lamb1	0.797092
ENSMUSG00000002908	Kcnn1	0.6142
ENSMUSG00000002910	Arrdc2	1.93374
ENSMUSG00000002944	Cd36	0.605638
ENSMUSG00000002948	Map2k7	2.10305
ENSMUSG00000002949	Timm44	1.50691
ENSMUSG00000002957	Ap2a2	1.61336
ENSMUSG00000002963	Pnkp	1.23865
ENSMUSG00000002968	Med25	1.41708
ENSMUSG00000002980	Bcam	0.837234
ENSMUSG00000002981	Clptm1	0.830045
ENSMUSG00000002983	Relb	2.4254
ENSMUSG00000002984	Tomm40	0.558415
ENSMUSG00000002985	Apoe	0.190357
ENSMUSG00000002992	Apoc2	0.400868
ENSMUSG00000002996	Hbp1	2.00232
ENSMUSG00000003031	Cdkn1b	1.4768
ENSMUSG00000003032	Klf4	4.97961
ENSMUSG00000003033	Ap1m1	2.1551
ENSMUSG00000003037	Rab8a	0.4739
ENSMUSG00000003038	Hmgn2	0.435746
ENSMUSG00000003039	Fam32a	0.726055
ENSMUSG00000003053	Cyp2c29	0.908045
ENSMUSG00000003062	Stard3nl	1.2234
ENSMUSG00000003068	Stk11	1.0578
ENSMUSG00000003072	Atp5d	0.25995
ENSMUSG00000003099	Ppp5c	1.73997
ENSMUSG00000003119	Cdk12	1.46942
ENSMUSG00000003123	Lipe	1.30916
ENSMUSG00000003131	Pafah1b2	1.92472
ENSMUSG00000003134	Tbc1d8	2.11654
ENSMUSG00000003135	Cnot11	3.33748
ENSMUSG00000003154	Foxj2	5.04912
ENSMUSG00000003161	Sri	1.26446
ENSMUSG00000003166	Dgcr2	1.57615
ENSMUSG00000003184	Irf3	1.67806
ENSMUSG00000003190	Bcl2l12	1.70825
ENSMUSG00000003198	Zfp959	2.00111
ENSMUSG00000003199	Mpnd	0.727828
ENSMUSG00000003200	Sh3gl1	5.64222
ENSMUSG00000003206	Ebi3	2.01612
ENSMUSG00000003208	Ccdc94	0.470482
ENSMUSG00000003226	Ranbp2	1.27619
ENSMUSG00000003228	Grk5	2.19041
ENSMUSG00000003233	Dvl3	3.52862
ENSMUSG00000003234	Abcf3	1.63832
ENSMUSG00000003235	Eif2b5	0.827841
ENSMUSG00000003269	Cyth2	0.896817
ENSMUSG00000003283	Hck	1.12172
ENSMUSG00000003299	Mrpl4	6.3854
ENSMUSG00000003308	Keap1	0.685416
ENSMUSG00000003316	Glg1	0.881477
ENSMUSG00000003344	Btbd2	1.26412
ENSMUSG00000003345	Csnk1g2	1.03606
ENSMUSG00000003346	Abhd17a	0.452951
ENSMUSG00000003348	Mob3a	2.38607
ENSMUSG00000003352	Cacnb3	1.43231
ENSMUSG00000003355	Fkbp11	1.17941
ENSMUSG00000003360	Ddx23	2.63256
ENSMUSG00000003363	Pld3	2.07733
ENSMUSG00000003378	Grik5	1.112
ENSMUSG00000003380	Rabac1	3.08558
ENSMUSG00000003382	Etv3	1.18861
ENSMUSG00000003402	Prkcsh	0.450088
ENSMUSG00000003420	Fcgrt	0.388261
ENSMUSG00000003421	Nosip	0.514853
ENSMUSG00000003423	Pih1d1	0.382534
ENSMUSG00000003429	Rps11	0.179659
ENSMUSG00000003435	Supt5	3.26464
ENSMUSG00000003437	Paf1	1.32326
ENSMUSG00000003438	Timm50	0.917003
ENSMUSG00000003444	Med29	0.345787
ENSMUSG00000003458	Ncstn	1.87025
ENSMUSG00000003464	Pex19	1.07429
ENSMUSG00000003477	Inmt	0.52782
ENSMUSG00000003500	Impdh1	2.7593
ENSMUSG00000003518	Dusp3	1.64641
ENSMUSG00000003526	Prodh	1.71338
ENSMUSG00000003527	Dgcr14	7.29083
ENSMUSG00000003528	Slc25a1	0.675263
ENSMUSG00000003531	Dgcr6	0.300188
ENSMUSG00000003541	Ier3	4.0026
ENSMUSG00000003546	Klc4	1.84309
ENSMUSG00000003549	Ercc1	0.608292
ENSMUSG00000003555	Cyp17a1	0.801007
ENSMUSG00000003559	As3mt	0.696359
ENSMUSG00000003573	Homer3	0.922346
ENSMUSG00000003575	Crtc1	3.13677
ENSMUSG00000003581	Rnf215	1.90239
ENSMUSG00000003585	Sec14l2	0.400534
ENSMUSG00000003604	Aven	0.750187
ENSMUSG00000003617	Cp	0.771098
ENSMUSG00000003623	Crot	1.1947
ENSMUSG00000003644	Rps6ka1	1.91678
ENSMUSG00000003660	Snrnp200	1.0187
ENSMUSG00000003662	Ciao1	0.457825
ENSMUSG00000003680	Taf6l	3.97826
ENSMUSG00000003721	Insig2	0.934909
ENSMUSG00000003731	Kpna6	2.74539
ENSMUSG00000003746	Man1a	1.21561
ENSMUSG00000003752	Itpkc	1.17584
ENSMUSG00000003762	Adck4	0.647548
ENSMUSG00000003778	Brd8	2.15397
ENSMUSG00000003779	Kif20a	3.12238
ENSMUSG00000003808	Farsa	1.72814
ENSMUSG00000003809	Gcdh	0.722809
ENSMUSG00000003810	Mast2	5.08846
ENSMUSG00000003812	Dnase2a	0.711352
ENSMUSG00000003813	Rad23a	0.384307
ENSMUSG00000003814	Calr	0.474538
ENSMUSG00000003824	Syce2	5.30512
ENSMUSG00000003847	Nfat5	2.58845
ENSMUSG00000003848	Nob1	1.77393
ENSMUSG00000003849	Nqo1	1.09071
ENSMUSG00000003865	Gys1	5.43311
ENSMUSG00000003868	Ruvbl2	1.15521
ENSMUSG00000003873	Bax	1.09313
ENSMUSG00000003923	Tfam	1.19183
ENSMUSG00000003929	Zfp81	1.76459
ENSMUSG00000003948	Mmd	1.71275
ENSMUSG00000003949	Hlf	1.80109
ENSMUSG00000003955	Fam162a	1.15339
ENSMUSG00000003970	Rpl8	0.204621
ENSMUSG00000003992	Ssbp2	1.52166
ENSMUSG00000004018	Fancl	1.16925
ENSMUSG00000004032	Gstm5	1.01944
ENSMUSG00000004035	Gstm7	0.387543
ENSMUSG00000004038	Gstm3	1.28005
ENSMUSG00000004040	Stat3	1.94315
ENSMUSG00000004043	Stat5a	2.86396
ENSMUSG00000004044	Ptrf	0.545756
ENSMUSG00000004054	Map3k11	3.19264
ENSMUSG00000004056	Akt2	1.01488
ENSMUSG00000004069	Dnaja3	0.649988
ENSMUSG00000004070	Hmox2	0.62784
ENSMUSG00000004071	Cdip1	2.37666
ENSMUSG00000004085	Zak	1.61548
ENSMUSG00000004096	Cwc15	0.193581
ENSMUSG00000004098	Col5a3	23.98
ENSMUSG00000004099	Dnmt1	2.19082
ENSMUSG00000004100	Ppan	2.66049
ENSMUSG00000004105	Angptl2	1.49443
ENSMUSG00000004127	Trmt10a	1.94321
ENSMUSG00000004187	Kifc2	5.1388
ENSMUSG00000004207	Psap	0.754287
ENSMUSG00000004221	Ikbkg	1.88096
ENSMUSG00000004233	Wars2	1.69775
ENSMUSG00000004263	Atn1	5.05121
ENSMUSG00000004264	Phb2	0.811638
ENSMUSG00000004266	Ptpn6	1.01879
ENSMUSG00000004268	Emg1	0.94351
ENSMUSG00000004270	Lpcat3	3.49262
ENSMUSG00000004285	Atp6v1f	0.379273
ENSMUSG00000004317	Clcn5	3.2941
ENSMUSG00000004319	Clcn3	1.68795
ENSMUSG00000004341	Gpx6	1.02772
ENSMUSG00000004356	Utp20	1.67306
ENSMUSG00000004359	Spic	1.41207
ENSMUSG00000004364	Cul3	1.85961
ENSMUSG00000004383	Large	1.09702
ENSMUSG00000004393	Ddx56	0.603012
ENSMUSG00000004394	Tmed4	1.05852
ENSMUSG00000004446	Bid	1.4971
ENSMUSG00000004451	Ralb	2.26021
ENSMUSG00000004455	Ppp1cc	3.65701
ENSMUSG00000004460	Dnajb11	0.450138
ENSMUSG00000004462	Tbccd1	1.48547
ENSMUSG00000004473	Clec11a	0.258887
ENSMUSG00000004500	Zfp324	1.67938
ENSMUSG00000004508	Gab2	2.04296
ENSMUSG00000004530	Coro1c	1.03286
ENSMUSG00000004535	Tax1bp1	0.804808
ENSMUSG00000004558	Ndrg2	0.7317
ENSMUSG00000004561	Mettl17	5.21048
ENSMUSG00000004562	Arhgef40	1.90489
ENSMUSG00000004565	Pnpla6	9.83388
ENSMUSG00000004567	Mcoln1	1.55136
ENSMUSG00000004568	Arhgef18	1.8378
ENSMUSG00000004591	Pkn2	2.88982
ENSMUSG00000004610	Etfb	0.361073
ENSMUSG00000004612	Nkg7	1.27749
ENSMUSG00000004626	Stxbp2	2.44455
ENSMUSG00000004631	Sgce	0.55255
ENSMUSG00000004633	Chn2	1.03445
ENSMUSG00000004637	Wwox	0.62921
ENSMUSG00000004642	Slbp	0.507571
ENSMUSG00000004651	Tyr	1.20067
ENSMUSG00000004655	Aqp1	0.796791
ENSMUSG00000004661	Arid3b	6.94867
ENSMUSG00000004665	Cnn2	1.34068
ENSMUSG00000004667	Polr2e	0.637525
ENSMUSG00000004677	Myo9b	2.32504
ENSMUSG00000004730	Adgre1	0.682893
ENSMUSG00000004748	Mtfp1	0.552649
ENSMUSG00000004768	Rab23	2.38284
ENSMUSG00000004771	Rab11a	0.779012
ENSMUSG00000004788	Eif2b2	1.35488
ENSMUSG00000004789	Dlst	0.754591
ENSMUSG00000004798	Ulk2	2.24634
ENSMUSG00000004814	Ccl24	0.307468
ENSMUSG00000004815	Dgkq	10.2221
ENSMUSG00000004837	Grap	0.815132
ENSMUSG00000004843	Chmp2b	0.751114
ENSMUSG00000004846	Plod3	1.27371
ENSMUSG00000004849	Ap1s1	1.01791
ENSMUSG00000004865	Srpk1	1.9646
ENSMUSG00000004880	Lbr	2.52139
ENSMUSG00000004891	Nes	0.768687
ENSMUSG00000004895	Prcc	1.01417
ENSMUSG00000004896	Rrnad1	3.65287
ENSMUSG00000004897	Hdgf	0.314099
ENSMUSG00000004929	Thop1	1.18086
ENSMUSG00000004931	Apba3	1.82469
ENSMUSG00000004934	Pias4	2.06544
ENSMUSG00000004936	Map2k1	0.619501
ENSMUSG00000004937	Sgta	0.752417
ENSMUSG00000004945	Tmem242	0.149046
ENSMUSG00000004947	Dtx2	7.47205
ENSMUSG00000004951	Hspb1	0.468026
ENSMUSG00000004952	Rasa4	2.50594
ENSMUSG00000004980	Hnrnpa2b1	0.807213
ENSMUSG00000004994	Ccdc130	1.74359
ENSMUSG00000004996	Mri1	0.4994
ENSMUSG00000005034	Prkacb	1.24136
ENSMUSG00000005043	Sgsh	1.73352
ENSMUSG00000005054	Cstb	0.233092
ENSMUSG00000005057	Sh2b2	1.32391
ENSMUSG00000005069	Pex5	1.61687
ENSMUSG00000005078	Jkamp	1.29157
ENSMUSG00000005087	Cd44	1.34003
ENSMUSG00000005089	Slc1a2	2.13237
ENSMUSG00000005102	Eif2ak4	3.16162
ENSMUSG00000005103	Wdr1	0.81359
ENSMUSG00000005107	Slc2a9	0.816443
ENSMUSG00000005124	Wisp1	2.67001
ENSMUSG00000005125	Ndrg1	0.713967
ENSMUSG00000005142	Man2b1	2.34906
ENSMUSG00000005150	Wdr83	0.942301
ENSMUSG00000005161	Prdx2	0.279897
ENSMUSG00000005198	Polr2a	5.74151
ENSMUSG00000005204	Senp3	1.84421
ENSMUSG00000005225	Plekha8	3.695
ENSMUSG00000005233	Spc25	0.585949
ENSMUSG00000005251	Ripk4	1.61233
ENSMUSG00000005262	Ufd1l	0.777834
ENSMUSG00000005268	Prlr	1.50181
ENSMUSG00000005299	Letm1	0.497917
ENSMUSG00000005312	Ubqln1	0.938833
ENSMUSG00000005320	Fgfr4	2.37699
ENSMUSG00000005338	Cadm3	1.14317
ENSMUSG00000005354	Txn2	0.597203
ENSMUSG00000005362	Crbn	0.639094
ENSMUSG00000005370	Msh6	1.49876
ENSMUSG00000005371	Fbxo11	2.16905
ENSMUSG00000005373	Mlxipl	5.27234
ENSMUSG00000005374	Tbl2	2.15215
ENSMUSG00000005378	Wbscr22	1.23625
ENSMUSG00000005397	Nid1	1.37329
ENSMUSG00000005410	Mcm5	0.929688
ENSMUSG00000005413	Hmox1	3.34691
ENSMUSG00000005417	Mprip	2.43939
ENSMUSG00000005442	Cic	4.23074
ENSMUSG00000005447	Pafah1b3	1.4399
ENSMUSG00000005465	Il27ra	1.48244
ENSMUSG00000005469	Prkaca	2.10095
ENSMUSG00000005481	Ddx39	2.1066
ENSMUSG00000005483	Dnajb1	0.967702
ENSMUSG00000005493	Msh4	0.815594
ENSMUSG00000005501	Usp40	2.88984
ENSMUSG00000005505	Kbtbd4	1.35138
ENSMUSG00000005506	Celf1	1.79913
ENSMUSG00000005510	Ndufs3	0.322365
ENSMUSG00000005514	Por	1.29058
ENSMUSG00000005534	Insr	2.70624
ENSMUSG00000005547	Cyp2a5	0.774913
ENSMUSG00000005553	Atp4a	2.30106
ENSMUSG00000005566	Trim28	2.71432
ENSMUSG00000005575	Ube2m	0.402797
ENSMUSG00000005580	Adcy9	1.297
ENSMUSG00000005609	Ctr9	1.8844
ENSMUSG00000005610	Eif4g2	1.96831
ENSMUSG00000005615	Pcyt1a	2.0183
ENSMUSG00000005621	Zfp592	1.09293
ENSMUSG00000005625	Psmd4	0.315361
ENSMUSG00000005656	Snx6	1.9471
ENSMUSG00000005667	Mthfd2	1.4245
ENSMUSG00000005672	Kit	3.0596
ENSMUSG00000005674	Tomm40l	2.17078
ENSMUSG00000005677	Nr1i3	2.6545
ENSMUSG00000005681	Apoa2	0.21105
ENSMUSG00000005682	Pan2	5.79007
ENSMUSG00000005683	Cs	2.40743
ENSMUSG00000005686	Ampd3	2.8593
ENSMUSG00000005687	Bcas2	0.678606
ENSMUSG00000005698	Ctcf	0.680597
ENSMUSG00000005699	Pard6a	0.790682
ENSMUSG00000005718	Tfap4	1.26873
ENSMUSG00000005732	Ranbp1	0.36778
ENSMUSG00000005774	Rfx5	4.22664
ENSMUSG00000005779	Psmb4	0.389418
ENSMUSG00000005802	Slc30a4	5.59434
ENSMUSG00000005803	Sqrdl	0.694136
ENSMUSG00000005804	Bloc1s6	3.79462
ENSMUSG00000005813	Metap1	1.63512
ENSMUSG00000005823	Gpr108	1.29704
ENSMUSG00000005836	Gata6	1.41456
ENSMUSG00000005846	Rsl1d1	0.870996
ENSMUSG00000005871	Apc	1.24242
ENSMUSG00000005873	Reep5	0.54487
ENSMUSG00000005881	Ergic3	3.10623
ENSMUSG00000005882	Uqcc1	0.655784
ENSMUSG00000005886	Ncoa2	1.86901
ENSMUSG00000005893	Nr2c2	3.45005
ENSMUSG00000005897	Nr2c1	1.18811
ENSMUSG00000005899	Smpd4	2.72367
ENSMUSG00000005907	Pex1	1.87233
ENSMUSG00000005936	Kctd20	2.33583
ENSMUSG00000005949	Ctns	3.79285
ENSMUSG00000005951	Shpk	1.05891
ENSMUSG00000005968	Tuft1	3.00806
ENSMUSG00000005973	Rcn1	1.13874
ENSMUSG00000005980	Dnase1	1.319
ENSMUSG00000005981	Trap1	0.530341
ENSMUSG00000005982	Naa60	1.14407
ENSMUSG00000005983	1700037C18Rik	0.641541
ENSMUSG00000006005	Tpr	1.04949
ENSMUSG00000006010	BC003331	1.25405
ENSMUSG00000006014	Prg4	0.926468
ENSMUSG00000006019	Dhx34	1.44148
ENSMUSG00000006021	Kptn	0.77749
ENSMUSG00000006024	Napa	1.01291
ENSMUSG00000006050	Sra1	1.41915
ENSMUSG00000006057	Atp5g1	0.267798
ENSMUSG00000006058	Snf8	0.463201
ENSMUSG00000006095	Tbcb	0.27523
ENSMUSG00000006127	Inpp5k	4.01802
ENSMUSG00000006134	Crkl	1.47866
ENSMUSG00000006154	Eps8l1	1.26389
ENSMUSG00000006169	Clint1	0.837416
ENSMUSG00000006191	Cdkal1	0.725408
ENSMUSG00000006215	Zbtb17	2.2903
ENSMUSG00000006218	Fam131c	0.929394
ENSMUSG00000006235	Epor	7.91691
ENSMUSG00000006241	Ccdc159	1.37871
ENSMUSG00000006262	Mob1b	2.30129
ENSMUSG00000006273	Atp6v1b2	4.24649
ENSMUSG00000006276	Eps15l1	2.92891
ENSMUSG00000006281	Tep1	1.4786
ENSMUSG00000006288	Ttc5	1.32473
ENSMUSG00000006289	Osgep	0.712407
ENSMUSG00000006299	Aamp	1.01156
ENSMUSG00000006301	Tmbim1	0.680475
ENSMUSG00000006304	Arpc2	0.626007
ENSMUSG00000006307	Kmt2b	4.51689
ENSMUSG00000006315	Tmem147	2.07037
ENSMUSG00000006333	Rps9	0.300791
ENSMUSG00000006335	Tfpt	0.56361
ENSMUSG00000006342	Susd2	1.4838
ENSMUSG00000006344	Ggt5	1.51112
ENSMUSG00000006356	Crip2	0.920222
ENSMUSG00000006360	Crip1	0.285599
ENSMUSG00000006362	Cbfa2t3	3.68067
ENSMUSG00000006373	Pgrmc1	0.974183
ENSMUSG00000006378	Gcat	0.59572
ENSMUSG00000006386	Tek	1.15005
ENSMUSG00000006390	Elovl1	2.29728
ENSMUSG00000006392	Med8	0.711562
ENSMUSG00000006412	Pfdn2	0.557511
ENSMUSG00000006418	Rnf114	0.695519
ENSMUSG00000006423	C330007P06Rik	1.3519
ENSMUSG00000006442	Srm	0.818656
ENSMUSG00000006445	Epha2	2.15495
ENSMUSG00000006456	Rbm14	0.962887
ENSMUSG00000006463	Zdhhc24	10.5391
ENSMUSG00000006471	Ndor1	4.07465
ENSMUSG00000006476	Nsmf	2.80132
ENSMUSG00000006494	Pdk1	2.04647
ENSMUSG00000006498	Ptbp1	1.0649
ENSMUSG00000006517	Mvd	2.63529
ENSMUSG00000006519	Cyba	0.359484
ENSMUSG00000006522	Itih3	1.71186
ENSMUSG00000006526	Tmem110	1.59425
ENSMUSG00000006527	Sfmbt1	2.12268
ENSMUSG00000006529	Itih1	0.669122
ENSMUSG00000006538	Ihh	4.4384
ENSMUSG00000006567	Atp7b	1.42022
ENSMUSG00000006575	Rundc3a	1.1776
ENSMUSG00000006585	Cdt1	2.14524
ENSMUSG00000006589	Aprt	1.32973
ENSMUSG00000006599	Gtf2h1	0.896515
ENSMUSG00000006611	Hfe	0.659429
ENSMUSG00000006641	Slc5a6	5.44242
ENSMUSG00000006673	Qrich1	2.07214
ENSMUSG00000006676	Usp19	2.75703
ENSMUSG00000006678	Pola1	0.886185
ENSMUSG00000006699	Cdc42	1.14954
ENSMUSG00000006705	Pknox1	2.41711
ENSMUSG00000006711	D130043K22Rik	1.76652
ENSMUSG00000006715	Gmnn	0.439167
ENSMUSG00000006717	Acot13	0.117015
ENSMUSG00000006728	Cdk4	1.0232
ENSMUSG00000006731	B4galnt1	0.946764
ENSMUSG00000006732	Mettl1	1.38381
ENSMUSG00000006736	Tspan31	0.474327
ENSMUSG00000006740	Kif5b	1.40061
ENSMUSG00000006763	Saal1	0.8326
ENSMUSG00000006777	Krt23	1.15668
ENSMUSG00000006782	Cnp	0.579694
ENSMUSG00000006784	Ttc25	0.643844
ENSMUSG00000006800	Sulf2	0.762192
ENSMUSG00000006818	Sod2	0.667567
ENSMUSG00000006850	Tmco6	3.21668
ENSMUSG00000006906	Stambp	0.470265
ENSMUSG00000006920	Ezh1	1.82358
ENSMUSG00000006930	Hap1	3.34742
ENSMUSG00000006931	P3h4	1.29648
ENSMUSG00000006932	Ctnnb1	1.81985
ENSMUSG00000006941	Eif1b	0.523816
ENSMUSG00000006958	Chrd	7.22172
ENSMUSG00000006998	Psmd2	0.957637
ENSMUSG00000007029	Vars	1.69048
ENSMUSG00000007033	Hspa1l	0.69525
ENSMUSG00000007035	Msh5	6.4314
ENSMUSG00000007036	Abhd16a	2.27584
ENSMUSG00000007038	Neu1	0.751909
ENSMUSG00000007039	Ddah2	1.10047
ENSMUSG00000007041	Clic1	1.13875
ENSMUSG00000007050	Lsm2	0.876146
ENSMUSG00000007080	Pole	1.73211
ENSMUSG00000007216	Zfp775	0.803314
ENSMUSG00000007338	Mrpl49	0.456763
ENSMUSG00000007379	Dennd2c	0.657713
ENSMUSG00000007411	Mark3	1.57807
ENSMUSG00000007415	Gatad1	0.783338
ENSMUSG00000007458	M6pr	0.794038
ENSMUSG00000007476	Lrrc8a	2.60327
ENSMUSG00000007564	Ppp2r1a	1.61642
ENSMUSG00000007570	Fance	1.39499
ENSMUSG00000007589	Tinf2	1.88609
ENSMUSG00000007594	Hapln4	0.527292
ENSMUSG00000007603	Dus3l	3.10867
ENSMUSG00000007610	Gtpbp3	1.8998
ENSMUSG00000007613	Tgfbr1	5.39176
ENSMUSG00000007617	Homer1	3.40006
ENSMUSG00000007655	Cav1	1.09334
ENSMUSG00000007656	Arpp19	0.564544
ENSMUSG00000007659	Bcl2l1	0.88131
ENSMUSG00000007670	Khsrp	1.78883
ENSMUSG00000007721	Ccdc124	0.199172
ENSMUSG00000007739	Cct4	0.707267
ENSMUSG00000007777	0610009B22Rik	0.358398
ENSMUSG00000007812	Zfp655	2.55333
ENSMUSG00000007815	Rhoa	0.680675
ENSMUSG00000007817	Zmiz1	5.21573
ENSMUSG00000007827	Ankrd26	1.10219
ENSMUSG00000007833	Aldh16a1	0.860095
ENSMUSG00000007836	Hnrnpa0	0.730245
ENSMUSG00000007837	Prrg2	1.03629
ENSMUSG00000007850	Hnrnph1	3.19326
ENSMUSG00000007867	Ift43	0.993595
ENSMUSG00000007872	Id3	2.21698
ENSMUSG00000007880	Arid1a	4.07211
ENSMUSG00000007891	Ctsd	0.498584
ENSMUSG00000007892	Rplp1	0.227443
ENSMUSG00000007950	Abhd8	1.67316
ENSMUSG00000007987	Ift22	0.268843
ENSMUSG00000008035	Mid1ip1	1.52234
ENSMUSG00000008036	Ap2s1	0.511197
ENSMUSG00000008090	Fgfrl1	1.09214
ENSMUSG00000008140	Emc10	0.616485
ENSMUSG00000008153	Clstn3	1.01273
ENSMUSG00000008167	Fbxw9	1.11154
ENSMUSG00000008200	Fnbp4	4.92838
ENSMUSG00000008206	Cers4	1.37545
ENSMUSG00000008226	Scrn3	0.490723
ENSMUSG00000008301	Phax	0.455797
ENSMUSG00000008305	Tle1	0.893151
ENSMUSG00000008333	Snrpb2	0.725473
ENSMUSG00000008348	Ubc	0.306864
ENSMUSG00000008373	Prpf31	1.48805
ENSMUSG00000008384	Sertad1	1.12438
ENSMUSG00000008393	Carhsp1	0.67073
ENSMUSG00000008398	Elk3	2.03533
ENSMUSG00000008429	Herpud2	1.21265
ENSMUSG00000008435	Rdh13	2.06091
ENSMUSG00000008450	Nutf2	0.661928
ENSMUSG00000008475	Arpc5	0.911296
ENSMUSG00000008496	Pou2f2	2.55386
ENSMUSG00000008540	Mgst1	0.561448
ENSMUSG00000008575	Nfib	2.07293
ENSMUSG00000008604	Ubqln4	1.37593
ENSMUSG00000008668	Rps18	0.166134
ENSMUSG00000008682	Rpl10	0.377067
ENSMUSG00000008683	Rps15a	0.166926
ENSMUSG00000008690	Ncaph2	1.24337
ENSMUSG00000008730	Hipk1	3.13835
ENSMUSG00000008763	Man1a2	3.19323
ENSMUSG00000008822	Acyp1	0.278487
ENSMUSG00000008845	Cd163	1.46845
ENSMUSG00000008855	Hdac5	1.98443
ENSMUSG00000008859	Rala	0.528668
ENSMUSG00000008892	Vdac3	0.338941
ENSMUSG00000008958	Vps72	1.07196
ENSMUSG00000008976	Gabpa	2.68534
ENSMUSG00000008999	Bmp7	0.6723
ENSMUSG00000009013	Dynll1	0.360776
ENSMUSG00000009030	Pdcl	1.77542
ENSMUSG00000009035	Tmem184b	1.72316
ENSMUSG00000009073	Nf2	5.50306
ENSMUSG00000009075	Cabp7	0.479532
ENSMUSG00000009076	Zmat5	0.34796
ENSMUSG00000009079	Ewsr1	2.80083
ENSMUSG00000009090	Ap1b1	0.843036
ENSMUSG00000009092	Derl3	1.18434
ENSMUSG00000009108	Gnat2	0.815547
ENSMUSG00000009112	Bcl2l13	1.76803
ENSMUSG00000009145	Dqx1	4.26138
ENSMUSG00000009207	Lnp	3.91591
ENSMUSG00000009281	Rarres2	0.249428
ENSMUSG00000009291	Pttg1ip	0.701466
ENSMUSG00000009292	Trpm2	0.487707
ENSMUSG00000009293	Ube2g2	1.29171
ENSMUSG00000009376	Met	2.50536
ENSMUSG00000009378	Slc16a12	1.84106
ENSMUSG00000009406	Elk1	1.22767
ENSMUSG00000009418	Nav1	2.88148
ENSMUSG00000009470	Tnpo1	4.10624
ENSMUSG00000009535	Rnmt	1.9167
ENSMUSG00000009549	Srp14	0.298122
ENSMUSG00000009555	Cdk9	1.37179
ENSMUSG00000009563	Tor2a	0.863696
ENSMUSG00000009566	Fpgs	2.61656
ENSMUSG00000009569	Mkl2	2.68651
ENSMUSG00000009575	Cbx5	5.83006
ENSMUSG00000009585	Apobec3	3.6731
ENSMUSG00000009614	Sardh	0.73203
ENSMUSG00000009621	Vav2	1.6212
ENSMUSG00000009630	Ppp2cb	0.778773
ENSMUSG00000009633	G0s2	0.707776
ENSMUSG00000009640	Dmap1	1.24864
ENSMUSG00000009646	Pla2g12b	0.300687
ENSMUSG00000009647	Mcu	0.621469
ENSMUSG00000009654	Oit3	1.97616
ENSMUSG00000009681	Bcr	1.33238
ENSMUSG00000009687	Fxyd5	0.835685
ENSMUSG00000009733	Tfcp2	1.67566
ENSMUSG00000009739	Pou6f1	2.52967
ENSMUSG00000009741	Ubp1	3.09955
ENSMUSG00000009772	Nuak2	2.4755
ENSMUSG00000009828	Ick	1.35713
ENSMUSG00000009863	Sdhb	0.245579
ENSMUSG00000009894	Snap47	0.364409
ENSMUSG00000009905	Kdsr	1.89927
ENSMUSG00000009907	Vps4b	2.35898
ENSMUSG00000009927	Rps25	0.239418
ENSMUSG00000009995	Taz	2.73337
ENSMUSG00000010025	Aldh3a2	0.984542
ENSMUSG00000010044	Zmynd10	4.34884
ENSMUSG00000010045	Tmem115	0.530444
ENSMUSG00000010047	Hyal2	2.24467
ENSMUSG00000010048	Ifrd2	1.29885
ENSMUSG00000010051	Hyal1	0.886504
ENSMUSG00000010054	Tusc2	5.11233
ENSMUSG00000010057	Nprl2	1.4942
ENSMUSG00000010064	Slc38a3	2.93347
ENSMUSG00000010067	Rassf1	1.03851
ENSMUSG00000010095	Slc3a2	0.900633
ENSMUSG00000010097	Nxf1	1.61977
ENSMUSG00000010110	Stx5a	3.16249
ENSMUSG00000010122	Slc47a1	1.24288
ENSMUSG00000010175	Prox1	2.09928
ENSMUSG00000010205	Raver1	2.91242
ENSMUSG00000010277	2610507B11Rik	2.8179
ENSMUSG00000010290	AI597479	2.39988
ENSMUSG00000010307	Tmem86a	1.49361
ENSMUSG00000010358	Ifi35	0.834147
ENSMUSG00000010362	Rdm1	0.710833
ENSMUSG00000010376	Nedd8	0.238835
ENSMUSG00000010392	Gosr1	1.05391
ENSMUSG00000010406	Mrpl52	0.199122
ENSMUSG00000010453	Kansl3	1.10469
ENSMUSG00000010517	Faf1	1.20176
ENSMUSG00000010538	Tsacc	0.274984
ENSMUSG00000010554	Mettl16	0.904892
ENSMUSG00000010601	Apol7a	1.23301
ENSMUSG00000010607	Pigyl	0.2146
ENSMUSG00000010608	Rbm25	2.46679
ENSMUSG00000010609	Psen2	1.54801
ENSMUSG00000010651	Acaa1b	0.949756
ENSMUSG00000010663	Fads1	0.752876
ENSMUSG00000010721	Lmbr1	3.17232
ENSMUSG00000010755	Cars	1.6408
ENSMUSG00000010797	Wnt2	0.376787
ENSMUSG00000010830	Kdelr3	2.1209
ENSMUSG00000010911	Apip	0.630304
ENSMUSG00000010914	Pdhx	1.14969
ENSMUSG00000010936	Vac14	2.14847
ENSMUSG00000011096	Akt1s1	1.0086
ENSMUSG00000011114	Tbrg1	0.634347
ENSMUSG00000011148	Adssl1	0.637653
ENSMUSG00000011158	Brf1	1.56736
ENSMUSG00000011179	Odc1	1.50103
ENSMUSG00000011254	Thg1l	2.56903
ENSMUSG00000011257	Pabpc4	1.73707
ENSMUSG00000011263	Exoc3l2	1.51895
ENSMUSG00000011267	Zfp296	1.00681
ENSMUSG00000011305	Plin5	0.648037
ENSMUSG00000011306	Sugp1	1.90606
ENSMUSG00000011382	Dhdh	0.289919
ENSMUSG00000011427	Zfp790	1.95229
ENSMUSG00000011658	Fuz	1.9515
ENSMUSG00000011752	Pgam1	1.08482
ENSMUSG00000011831	Evi5	1.75643
ENSMUSG00000011832	Evi5l	2.0081
ENSMUSG00000011837	Snapc2	1.15453
ENSMUSG00000011877	Git1	3.68466
ENSMUSG00000011884	Gltp	0.746728
ENSMUSG00000011958	Bnip2	1.31147
ENSMUSG00000011960	Ccnt1	3.35614
ENSMUSG00000012017	Scarf2	1.52393
ENSMUSG00000012076	Brms1l	3.62256
ENSMUSG00000012114	Med15	1.61167
ENSMUSG00000012117	Dhdds	0.555468
ENSMUSG00000012296	Tjap1	3.59309
ENSMUSG00000012405	Rpl15	0.647322
ENSMUSG00000012422	Tmem167	1.63451
ENSMUSG00000012428	Steap4	1.15982
ENSMUSG00000012429	Mplkip	0.805211
ENSMUSG00000012483	Rpa3	0.336888
ENSMUSG00000012519	Mlkl	3.84916
ENSMUSG00000012535	Tnpo3	0.956473
ENSMUSG00000012609	Ttll5	1.67544
ENSMUSG00000012640	Zfp715	1.48745
ENSMUSG00000012777	Acpt	1.71726
ENSMUSG00000012848	Rps5	0.249316
ENSMUSG00000013033	Adgrl1	2.48179
ENSMUSG00000013076	Amotl1	2.81374
ENSMUSG00000013089	Etv5	2.9326
ENSMUSG00000013150	Gfod2	1.18885
ENSMUSG00000013160	Atp6v0d1	1.12388
ENSMUSG00000013236	Ptprs	1.7473
ENSMUSG00000013275	Slc41a1	4.16765
ENSMUSG00000013465	Nelfb	1.8833
ENSMUSG00000013495	Tmem175	4.49472
ENSMUSG00000013539	Tango2	0.613768
ENSMUSG00000013593	Ndufs2	0.521402
ENSMUSG00000013622	Atraid	0.729593
ENSMUSG00000013629	Cad	3.07591
ENSMUSG00000013646	Sh3bp5l	1.26933
ENSMUSG00000013662	Atad1	1.45447
ENSMUSG00000013663	Pten	4.27536
ENSMUSG00000013698	Pea15a	0.984845
ENSMUSG00000013701	Timm23	0.546516
ENSMUSG00000013707	Tnfaip8l2	0.977868
ENSMUSG00000013736	Trnt1	2.08404
ENSMUSG00000013787	Ehmt2	2.0928
ENSMUSG00000013822	Elof1	0.328711
ENSMUSG00000013833	Med16	0.719409
ENSMUSG00000013846	St3gal1	0.868356
ENSMUSG00000013858	Tmem259	1.40441
ENSMUSG00000013878	Rnf170	1.64087
ENSMUSG00000013973	Dedd	0.895373
ENSMUSG00000013997	Nit1	0.90465
ENSMUSG00000014039	Prdm15	3.31584
ENSMUSG00000014074	Rnf168	0.546829
ENSMUSG00000014075	Tctex1d2	0.944868
ENSMUSG00000014077	Chp1	1.72682
ENSMUSG00000014177	Tvp23b	0.945924
ENSMUSG00000014195	Dnajc7	1.49773
ENSMUSG00000014226	Cacybp	0.483
ENSMUSG00000014232	Cluap1	0.70713
ENSMUSG00000014243	Zswim7	0.6069
ENSMUSG00000014245	Pigl	0.781354
ENSMUSG00000014294	Ndufa2	0.105379
ENSMUSG00000014301	Pam16	0.197333
ENSMUSG00000014313	Cox6c	0.128938
ENSMUSG00000014349	Ube2z	1.59929
ENSMUSG00000014353	Tmem87b	3.93059
ENSMUSG00000014355	Anapc1	3.25338
ENSMUSG00000014361	Mertk	1.62234
ENSMUSG00000014402	Tsg101	0.945803
ENSMUSG00000014418	Hps5	3.45781
ENSMUSG00000014426	Map3k4	0.961608
ENSMUSG00000014444	Piezo1	2.12679
ENSMUSG00000014470	Rnf166	1.47678
ENSMUSG00000014496	Ankrd28	1.83293
ENSMUSG00000014498	Ankrd52	2.20214
ENSMUSG00000014503	Pkd2l2	2.38197
ENSMUSG00000014504	Srp19	1.18138
ENSMUSG00000014542	Clec4f	1.30054
ENSMUSG00000014547	Wdfy2	0.96617
ENSMUSG00000014550	Rbsn	2.42391
ENSMUSG00000014551	Mrps25	1.37921
ENSMUSG00000014554	Dguok	1.72644
ENSMUSG00000014592	Camta1	0.46375
ENSMUSG00000014599	Csf1	2.15435
ENSMUSG00000014601	Strip1	3.19374
ENSMUSG00000014606	Slc25a11	0.620466
ENSMUSG00000014633	Cmc2	0.257436
ENSMUSG00000014668	Chfr	4.84572
ENSMUSG00000014748	Tex261	1.24341
ENSMUSG00000014763	Fam120b	2.13521
ENSMUSG00000014767	Tbp	1.80271
ENSMUSG00000014769	Psmb1	0.533085
ENSMUSG00000014773	Dll1	3.55917
ENSMUSG00000014776	Nol3	1.45985
ENSMUSG00000014778	Fhod1	4.77939
ENSMUSG00000014791	Elmo3	2.4748
ENSMUSG00000014837	4931428F04Rik	1.92838
ENSMUSG00000014850	Msh3	1.94994
ENSMUSG00000014852	Adamts13	1.83704
ENSMUSG00000014856	Tmem208	0.425919
ENSMUSG00000014859	E2f4	2.71977
ENSMUSG00000014867	Surf4	1.03513
ENSMUSG00000014873	Surf2	1.04511
ENSMUSG00000014905	Dnajb9	2.97646
ENSMUSG00000014907	Naf1	1.37802
ENSMUSG00000014932	Yes1	1.57114
ENSMUSG00000014956	Ppp1cb	0.813974
ENSMUSG00000014959	Gorasp2	0.992455
ENSMUSG00000014980	Tsen15	0.900806
ENSMUSG00000015002	Efr3a	2.4473
ENSMUSG00000015013	Trappc2l	1.04532
ENSMUSG00000015016	Acsf3	0.422155
ENSMUSG00000015023	Ddx19a	1.92801
ENSMUSG00000015027	Galns	0.695252
ENSMUSG00000015083	C8g	0.321077
ENSMUSG00000015085	Entpd2	1.75917
ENSMUSG00000015087	Rabl6	6.59669
ENSMUSG00000015090	Ptgds	7.86596
ENSMUSG00000015092	Edf1	1.11663
ENSMUSG00000015093	Clic3	0.561657
ENSMUSG00000015094	Npdc1	1.26593
ENSMUSG00000015095	Fbxw5	2.23916
ENSMUSG00000015112	Slc25a13	4.35599
ENSMUSG00000015120	Ube2i	1.91438
ENSMUSG00000015126	Tsr3	0.783082
ENSMUSG00000015127	Unkl	3.81682
ENSMUSG00000015133	Lrrk1	1.27609
ENSMUSG00000015143	Actn1	1.98877
ENSMUSG00000015149	Sirt2	0.430319
ENSMUSG00000015165	Hnrnpl	2.21364
ENSMUSG00000015176	Nolc1	1.57071
ENSMUSG00000015189	Casd1	2.39816
ENSMUSG00000015202	Cnksr3	1.3456
ENSMUSG00000015214	Mtmr1	1.4638
ENSMUSG00000015217	Hmgb3	1.11965
ENSMUSG00000015224	Cyp2j9	1.59657
ENSMUSG00000015243	Abca1	2.70977
ENSMUSG00000015247	Nipsnap3b	0.515962
ENSMUSG00000015289	Lage3	0.510239
ENSMUSG00000015290	Ubl4a	1.05815
ENSMUSG00000015291	Gdi1	1.44207
ENSMUSG00000015305	Sash1	1.15355
ENSMUSG00000015312	Gadd45b	0.485512
ENSMUSG00000015316	Slamf1	0.893295
ENSMUSG00000015335	Zdhhc12	3.40516
ENSMUSG00000015337	Endog	0.377202
ENSMUSG00000015340	Cybb	1.32916
ENSMUSG00000015341	Golga7	1.74463
ENSMUSG00000015342	Xk	7.3437
ENSMUSG00000015354	Pcolce2	1.05426
ENSMUSG00000015355	Cd48	0.852336
ENSMUSG00000015357	Clpx	2.67742
ENSMUSG00000015363	Trabd	1.30597
ENSMUSG00000015377	Dennd6b	8.72834
ENSMUSG00000015396	Cd83	1.66454
ENSMUSG00000015461	Atf6b	2.34128
ENSMUSG00000015467	Egfl8	6.62047
ENSMUSG00000015468	Notch4	1.41396
ENSMUSG00000015474	Ppt2	1.55107
ENSMUSG00000015478	Rnf5	0.437178
ENSMUSG00000015488	Cacfd1	0.779928
ENSMUSG00000015501	Hivep2	2.44241
ENSMUSG00000015522	Arnt	2.63464
ENSMUSG00000015536	Mocs2	0.560873
ENSMUSG00000015542	Nat9	0.507122
ENSMUSG00000015568	Lpl	0.625511
ENSMUSG00000015575	Atp6v0e	3.56821
ENSMUSG00000015597	Zfp318	1.3561
ENSMUSG00000015605	Srf	3.16228
ENSMUSG00000015647	Lama5	1.81896
ENSMUSG00000015653	Steap2	1.35838
ENSMUSG00000015656	Hspa8	0.568563
ENSMUSG00000015659	Serac1	1.91174
ENSMUSG00000015668	Pdzd11	0.758398
ENSMUSG00000015671	Psma2	0.25562
ENSMUSG00000015672	Mrpl32	0.407604
ENSMUSG00000015697	Setdb1	4.27302
ENSMUSG00000015702	Anxa9	1.63494
ENSMUSG00000015711	Prune	1.41817
ENSMUSG00000015714	Cers2	1.05566
ENSMUSG00000015733	Capza2	1.20417
ENSMUSG00000015745	Plekho1	3.61289
ENSMUSG00000015747	Vps45	0.78307
ENSMUSG00000015748	Prpf3	1.18663
ENSMUSG00000015749	Anp32e	1.02994
ENSMUSG00000015750	Aph1a	1.12628
ENSMUSG00000015755	Tab2	1.67228
ENSMUSG00000015757	Ppil4	2.23644
ENSMUSG00000015759	Cnih1	0.507852
ENSMUSG00000015776	Med22	1.0372
ENSMUSG00000015790	Surf1	0.524644
ENSMUSG00000015804	Med28	2.2626
ENSMUSG00000015806	Qdpr	0.425155
ENSMUSG00000015812	Gnrh1	8.85718
ENSMUSG00000015837	Sqstm1	0.472663
ENSMUSG00000015839	Nfe2l2	1.12853
ENSMUSG00000015843	Rxrg	1.44745
ENSMUSG00000015846	Rxra	1.79692
ENSMUSG00000015850	Adamtsl4	2.06041
ENSMUSG00000015854	Cd5l	1.05478
ENSMUSG00000015869	Prpsap1	1.16584
ENSMUSG00000015882	Lcorl	3.7993
ENSMUSG00000015889	Lta4h	1.20481
ENSMUSG00000015890	Amdhd1	0.369646
ENSMUSG00000015932	Dstn	0.431527
ENSMUSG00000015937	H2afy	0.939968
ENSMUSG00000015942	Gtf2ird2	1.74558
ENSMUSG00000015943	Bola1	0.134948
ENSMUSG00000015944	Gatsl2	3.34917
ENSMUSG00000015947	Fcgr1	0.653021
ENSMUSG00000015950	Ncf1	0.58773
ENSMUSG00000015961	Adss	2.50959
ENSMUSG00000015966	Il17rb	1.14791
ENSMUSG00000015968	Cacna1d	1.84081
ENSMUSG00000015970	Chdh	1.46044
ENSMUSG00000015971	Actr8	1.1287
ENSMUSG00000015994	Fnta	0.577397
ENSMUSG00000016018	Skiv2l2	0.702713
ENSMUSG00000016024	Lbp	0.982201
ENSMUSG00000016028	Celsr1	2.09151
ENSMUSG00000016087	Fli1	1.20851
ENSMUSG00000016128	Stard13	1.46737
ENSMUSG00000016181	Diexf	1.15117
ENSMUSG00000016194	Hsd11b1	0.34424
ENSMUSG00000016206	H2-M3	1.70931
ENSMUSG00000016252	Atp5e	0.11159
ENSMUSG00000016253	Nelfcd	1.84309
ENSMUSG00000016256	Ctsz	0.256897
ENSMUSG00000016257	Slmo2	0.372623
ENSMUSG00000016308	Ube2a	0.709762
ENSMUSG00000016319	Slc25a5	0.417167
ENSMUSG00000016344	Ppdpf	0.832703
ENSMUSG00000016382	Pls3	0.425136
ENSMUSG00000016409	Nkap	3.2056
ENSMUSG00000016427	Ndufa1	0.099194
ENSMUSG00000016477	E2f3	3.26206
ENSMUSG00000016481	Cr1l	0.486706
ENSMUSG00000016487	Ppfibp1	1.26241
ENSMUSG00000016494	Cd34	1.19592
ENSMUSG00000016495	Plgrkt	7.1073
ENSMUSG00000016496	Cd274	2.60454
ENSMUSG00000016503	Gtf3a	0.590455
ENSMUSG00000016510	Mtif3	0.89551
ENSMUSG00000016520	Lnx2	2.54967
ENSMUSG00000016526	Dyrk3	0.647632
ENSMUSG00000016528	Mapkapk2	1.53254
ENSMUSG00000016534	Lamp2	3.29254
ENSMUSG00000016541	Atxn10	0.435417
ENSMUSG00000016554	Eif3d	0.387558
ENSMUSG00000016559	H3f3b	1.23295
ENSMUSG00000016619	Nup50	2.54913
ENSMUSG00000016637	Ift27	0.20346
ENSMUSG00000016664	Pacsin2	1.13304
ENSMUSG00000016756	Cmah	1.36304
ENSMUSG00000016757	Ttll12	0.698486
ENSMUSG00000016758	Bik	5.48878
ENSMUSG00000016831	Tox4	2.23943
ENSMUSG00000016833	Mrps18c	0.24032
ENSMUSG00000016921	Srsf6	1.40523
ENSMUSG00000016933	Plcg1	3.43447
ENSMUSG00000016940	Kctd2	3.69974
ENSMUSG00000016942	Tmprss6	0.956119
ENSMUSG00000016946	Kctd5	3.83087
ENSMUSG00000016984	Etaa1	2.82159
ENSMUSG00000017002	Slpi	0.914924
ENSMUSG00000017009	Sdc4	1.45486
ENSMUSG00000017057	Il13ra1	1.27221
ENSMUSG00000017119	Nbr1	1.22598
ENSMUSG00000017132	Cyth1	1.35819
ENSMUSG00000017144	Rnd3	1.83208
ENSMUSG00000017167	Cntnap1	1.70784
ENSMUSG00000017176	Nt5c3b	0.867812
ENSMUSG00000017188	Coa3	0.157209
ENSMUSG00000017210	Med24	2.87428
ENSMUSG00000017221	Psmd3	0.851798
ENSMUSG00000017264	Exosc10	1.04264
ENSMUSG00000017286	Glod4	0.238191
ENSMUSG00000017288	Vps53	0.693749
ENSMUSG00000017291	Taok1	3.43792
ENSMUSG00000017299	Dnttip1	0.93711
ENSMUSG00000017307	Acot8	1.03708
ENSMUSG00000017309	Cd300lg	0.6021
ENSMUSG00000017344	Vtn	0.365377
ENSMUSG00000017376	Nlk	1.68508
ENSMUSG00000017386	Traf4	1.43738
ENSMUSG00000017390	Aldoc	0.387437
ENSMUSG00000017404	Rpl19	0.131147
ENSMUSG00000017405	Nek8	3.58587
ENSMUSG00000017418	Arl5b	4.25524
ENSMUSG00000017421	Zfp207	1.05622
ENSMUSG00000017428	Psmd11	0.450084
ENSMUSG00000017446	C1qtnf1	1.52124
ENSMUSG00000017453	Pipox	1.27479
ENSMUSG00000017466	Timp2	1.17523
ENSMUSG00000017478	Zc3h18	1.72818
ENSMUSG00000017485	Top2b	1.22781
ENSMUSG00000017491	Rarb	1.82045
ENSMUSG00000017493	Igfbp4	0.339987
ENSMUSG00000017548	Suz12	2.36018
ENSMUSG00000017550	Atad5	4.28582
ENSMUSG00000017561	Crlf3	0.812378
ENSMUSG00000017615	Tnfaip1	1.80254
ENSMUSG00000017631	Abr	2.33078
ENSMUSG00000017639	Rab11fip4	2.84123
ENSMUSG00000017652	Cd40	0.746298
ENSMUSG00000017664	Slc35c2	2.65881
ENSMUSG00000017670	Elmo2	2.1572
ENSMUSG00000017677	Wsb1	2.55302
ENSMUSG00000017679	Ttpal	2.69074
ENSMUSG00000017686	Rhot1	2.15267
ENSMUSG00000017697	Ada	0.638779
ENSMUSG00000017707	Serinc3	1.25263
ENSMUSG00000017713	Tha1	2.25122
ENSMUSG00000017715	Pgs1	3.2502
ENSMUSG00000017716	Birc5	1.56479
ENSMUSG00000017718	Afmid	1.15659
ENSMUSG00000017721	Pigt	2.22656
ENSMUSG00000017723	Wfdc2	0.206111
ENSMUSG00000017734	Dbndd2	1.77729
ENSMUSG00000017737	Mmp9	0.825853
ENSMUSG00000017740	Slc12a5	1.46318
ENSMUSG00000017747	Ghdc	0.639276
ENSMUSG00000017754	Pltp	0.755064
ENSMUSG00000017756	Slc12a7	2.78224
ENSMUSG00000017760	Ctsa	1.62252
ENSMUSG00000017764	Zswim1	7.96738
ENSMUSG00000017765	Slc12a4	2.57628
ENSMUSG00000017774	Myo1c	1.61712
ENSMUSG00000017776	Crk	1.88766
ENSMUSG00000017778	Cox7c	0.129858
ENSMUSG00000017781	Pitpna	0.92714
ENSMUSG00000017801	Mlx	1.20427
ENSMUSG00000017802	Fam134c	1.0833
ENSMUSG00000017830	Dhx58	1.40278
ENSMUSG00000017831	Rab5a	0.810798
ENSMUSG00000017837	Nkiras2	2.38044
ENSMUSG00000017843	Ppp2r5c	1.33869
ENSMUSG00000017858	Ift52	0.798321
ENSMUSG00000017868	Sgk2	1.49699
ENSMUSG00000017929	B4galt5	3.67501
ENSMUSG00000017950	Hnf4a	1.13955
ENSMUSG00000017969	Ptgis	1.58553
ENSMUSG00000017978	Cadps2	1.10963
ENSMUSG00000017999	Ddx27	0.966509
ENSMUSG00000018001	Cyth3	3.89125
ENSMUSG00000018008	Cyth4	1.43346
ENSMUSG00000018040	Rrp7a	0.959459
ENSMUSG00000018042	Cyb5r3	1.02555
ENSMUSG00000018068	Ints2	3.58898
ENSMUSG00000018076	Med13l	1.78159
ENSMUSG00000018102	Hist1h2bc	0.197865
ENSMUSG00000018143	Mafk	1.04568
ENSMUSG00000018160	Med1	2.34103
ENSMUSG00000018166	Erbb3	3.56446
ENSMUSG00000018167	Stard3	1.75507
ENSMUSG00000018169	Mfng	1.22363
ENSMUSG00000018171	Vmp1	0.937325
ENSMUSG00000018189	Uchl5	0.37689
ENSMUSG00000018196	Glrx2	0.6314
ENSMUSG00000018199	Trove2	4.2245
ENSMUSG00000018209	Stk4	2.04607
ENSMUSG00000018217	Pmp22	1.24744
ENSMUSG00000018238	Gdf9	1.37845
ENSMUSG00000018239	Zcchc10	1.56201
ENSMUSG00000018286	Psmb6	0.361919
ENSMUSG00000018287	Spag7	0.794611
ENSMUSG00000018293	Pfn1	0.482596
ENSMUSG00000018322	Tomm34	1.31573
ENSMUSG00000018326	Ywhab	0.561596
ENSMUSG00000018334	Ksr1	2.50326
ENSMUSG00000018339	Gpx3	0.569441
ENSMUSG00000018340	Anxa6	0.611223
ENSMUSG00000018347	Zkscan6	1.12659
ENSMUSG00000018362	Kpna2	2.14627
ENSMUSG00000018363	Smurf2	2.74517
ENSMUSG00000018372	Cep95	2.38795
ENSMUSG00000018377	Vezf1	2.68195
ENSMUSG00000018378	Cuedc1	1.20811
ENSMUSG00000018379	Srsf1	2.30873
ENSMUSG00000018381	Abi3	1.09777
ENSMUSG00000018387	Shroom1	1.91463
ENSMUSG00000018395	Kif3a	2.32977
ENSMUSG00000018398	43351	1.94362
ENSMUSG00000018401	Mtmr4	1.96157
ENSMUSG00000018405	Mrm1	10.4783
ENSMUSG00000018411	Mapt	3.14132
ENSMUSG00000018412	Kansl1	1.48836
ENSMUSG00000018415	Gid4	1.64474
ENSMUSG00000018417	Myo1b	0.816727
ENSMUSG00000018425	Dhx40	1.61003
ENSMUSG00000018427	Ypel2	5.66929
ENSMUSG00000018428	Akap1	1.40758
ENSMUSG00000018433	Nol11	1.21941
ENSMUSG00000018442	Derl2	1.22467
ENSMUSG00000018446	C1qbp	0.35813
ENSMUSG00000018449	Rpain	0.717846
ENSMUSG00000018459	Slc13a3	0.745413
ENSMUSG00000018474	Chd3	1.15446
ENSMUSG00000018476	Kdm6b	6.24301
ENSMUSG00000018481	Appbp2	3.01959
ENSMUSG00000018501	Ncor1	1.50843
ENSMUSG00000018507	Trpv2	1.63975
ENSMUSG00000018509	Cenpv	1.03911
ENSMUSG00000018537	Pcgf2	5.60558
ENSMUSG00000018541	Cwc25	0.728543
ENSMUSG00000018547	Pip4k2b	2.44422
ENSMUSG00000018548	Trim37	1.15804
ENSMUSG00000018559	Ctdnep1	1.87411
ENSMUSG00000018565	Elp5	0.584588
ENSMUSG00000018567	Gabarap	0.444766
ENSMUSG00000018572	Phf23	1.09811
ENSMUSG00000018574	Acadvl	1.15692
ENSMUSG00000018583	G3bp1	1.52368
ENSMUSG00000018585	Atox1	0.186382
ENSMUSG00000018593	Sparc	4.64647
ENSMUSG00000018599	Mief2	1.51991
ENSMUSG00000018604	Tbx3	2.03454
ENSMUSG00000018651	Tada2a	1.84894
ENSMUSG00000018654	Ikzf1	4.44878
ENSMUSG00000018659	Pnpo	0.953879
ENSMUSG00000018661	Cog1	3.35949
ENSMUSG00000018666	Cbx1	0.684084
ENSMUSG00000018669	Cdk5rap3	0.748792
ENSMUSG00000018672	Copz2	0.349831
ENSMUSG00000018677	Slc25a39	1.02231
ENSMUSG00000018678	Sp2	1.68509
ENSMUSG00000018697	Aatf	0.684645
ENSMUSG00000018707	Dync1h1	0.586884
ENSMUSG00000018727	Cpsf4l	3.68693
ENSMUSG00000018733	Pex12	1.4571
ENSMUSG00000018736	Ndel1	1.29984
ENSMUSG00000018740	Slc25a35	1.35846
ENSMUSG00000018750	Zbtb4	5.16369
ENSMUSG00000018752	Tnfsfm13	0.823866
ENSMUSG00000018761	Mpdu1	2.29601
ENSMUSG00000018765	Fxr2	2.7566
ENSMUSG00000018770	Atp5g3	0.431265
ENSMUSG00000018774	Cd68	0.945799
ENSMUSG00000018796	Acsl1	0.710754
ENSMUSG00000018800	Abca5	1.69482
ENSMUSG00000018809	Smyd4	1.58889
ENSMUSG00000018819	Lsp1	1.4544
ENSMUSG00000018820	Zfyve27	1.58886
ENSMUSG00000018821	Avpi1	0.264619
ENSMUSG00000018841	Rad51d	0.694375
ENSMUSG00000018845	Unc45b	1.57543
ENSMUSG00000018846	Pank3	3.73776
ENSMUSG00000018848	Rars	0.997715
ENSMUSG00000018849	Wwc1	1.12363
ENSMUSG00000018858	Ict1	0.373386
ENSMUSG00000018861	Fdxr	1.69373
ENSMUSG00000018882	Mrpl45	0.753936
ENSMUSG00000018899	Irf1	2.49
ENSMUSG00000018900	Slc22a5	3.07905
ENSMUSG00000018906	P4ha2	1.05214
ENSMUSG00000018909	Arrb1	2.14216
ENSMUSG00000018920	Cxcl16	1.16923
ENSMUSG00000018921	Pelp1	1.09859
ENSMUSG00000018923	Med11	0.464089
ENSMUSG00000018927	Ccl6	0.685504
ENSMUSG00000018931	Natd1	10.7091
ENSMUSG00000018932	Map2k3	1.85224
ENSMUSG00000018965	Ywhah	0.697745
ENSMUSG00000018974	Sart3	2.87882
ENSMUSG00000018995	Nars2	0.504528
ENSMUSG00000018999	Slc35b4	2.9141
ENSMUSG00000019039	Dalrd3	3.01339
ENSMUSG00000019054	Fis1	0.395103
ENSMUSG00000019055	Plod1	0.941695
ENSMUSG00000019066	Rab3d	0.904672
ENSMUSG00000019080	Mfsd3	1.41144
ENSMUSG00000019082	Slc25a22	2.48565
ENSMUSG00000019087	Atp6ap1	0.800929
ENSMUSG00000019088	Dnase1l1	1.67103
ENSMUSG00000019122	Ccl9	0.266666
ENSMUSG00000019132	BC005537	1.60854
ENSMUSG00000019139	Isyna1	1.65782
ENSMUSG00000019143	Hars2	2.47764
ENSMUSG00000019158	Tmem160	0.203768
ENSMUSG00000019173	Rab5c	0.589524
ENSMUSG00000019179	Mdh2	0.398439
ENSMUSG00000019188	H13	0.746732
ENSMUSG00000019189	Rnf145	1.27881
ENSMUSG00000019194	Scn1b	2.35787
ENSMUSG00000019210	Atp6v1e1	0.358214
ENSMUSG00000019232	Etnppl	0.712384
ENSMUSG00000019254	Ppp1r12c	3.42389
ENSMUSG00000019256	Ahr	2.75436
ENSMUSG00000019261	Map1s	1.30886
ENSMUSG00000019295	Tmem129	0.781637
ENSMUSG00000019297	Nop9	1.67957
ENSMUSG00000019302	Atp6v0a1	0.834026
ENSMUSG00000019303	Psmc3ip	3.54242
ENSMUSG00000019312	Grb7	4.01641
ENSMUSG00000019338	Zfp687	1.86812
ENSMUSG00000019362	D8Ertd738e	0.254659
ENSMUSG00000019368	Sec14l4	1.7942
ENSMUSG00000019370	Calm3	0.620115
ENSMUSG00000019373	Cops3	1.051
ENSMUSG00000019428	Fkbp8	0.85515
ENSMUSG00000019432	Ddx39b	1.75468
ENSMUSG00000019433	Gipc1	1.18318
ENSMUSG00000019437	Tlcd1	1.69747
ENSMUSG00000019461	Plscr3	4.50494
ENSMUSG00000019464	Ptger1	1.3117
ENSMUSG00000019467	Arhgef25	2.08243
ENSMUSG00000019470	Xab2	1.89964
ENSMUSG00000019471	Cdc37	0.41763
ENSMUSG00000019478	Rab4a	0.480633
ENSMUSG00000019487	Trip10	1.68904
ENSMUSG00000019494	Cops6	0.40007
ENSMUSG00000019505	Ubb	0.242118
ENSMUSG00000019518	Ap4m1	2.83876
ENSMUSG00000019528	Gyg	3.02232
ENSMUSG00000019539	Rcn3	0.528674
ENSMUSG00000019558	Slc6a8	2.4791
ENSMUSG00000019577	Pdk4	1.45253
ENSMUSG00000019578	Ubxn6	0.905795
ENSMUSG00000019579	Mydgf	0.676025
ENSMUSG00000019590	Cyb561	1.01734
ENSMUSG00000019647	Sema6a	1.28242
ENSMUSG00000019659	Ccdc12	0.394608
ENSMUSG00000019689	1110001J03Rik	0.14386
ENSMUSG00000019710	Mrpl24	0.33507
ENSMUSG00000019715	Gle1	1.52052
ENSMUSG00000019718	L3hypdh	0.573073
ENSMUSG00000019726	Lyst	0.387722
ENSMUSG00000019731	Slc35e1	1.26364
ENSMUSG00000019732	Calr3	0.404844
ENSMUSG00000019734	Tmc4	4.85894
ENSMUSG00000019737	Syne4	2.55232
ENSMUSG00000019738	Polr2i	0.264272
ENSMUSG00000019756	Prl8a1	1.74743
ENSMUSG00000019761	Krt10	0.3262
ENSMUSG00000019762	Iyd	0.486497
ENSMUSG00000019763	Rmnd1	1.33325
ENSMUSG00000019768	Esr1	1.81691
ENSMUSG00000019773	Fbxo5	1.46605
ENSMUSG00000019774	Mtrf1l	0.468973
ENSMUSG00000019777	Hdac2	3.62292
ENSMUSG00000019779	Frk	1.17305
ENSMUSG00000019782	Rwdd1	0.443797
ENSMUSG00000019790	Stxbp5	2.24325
ENSMUSG00000019791	Hint3	0.217868
ENSMUSG00000019792	Trmt11	1.06159
ENSMUSG00000019794	Katna1	1.24193
ENSMUSG00000019795	Pcmt1	0.719786
ENSMUSG00000019796	Lrp11	4.27764
ENSMUSG00000019797	1700021F05Rik	0.363261
ENSMUSG00000019802	Sec63	0.649501
ENSMUSG00000019804	Snx3	0.384868
ENSMUSG00000019806	Aig1	0.427855
ENSMUSG00000019808	Adat2	0.584302
ENSMUSG00000019809	Pex3	0.748083
ENSMUSG00000019810	Fuca2	12.1987
ENSMUSG00000019813	Cep57l1	1.44492
ENSMUSG00000019814	Ltv1	1.34751
ENSMUSG00000019818	Cd164	2.63681
ENSMUSG00000019820	Utrn	2.27491
ENSMUSG00000019822	Smpd2	2.70585
ENSMUSG00000019826	Zbtb24	1.6553
ENSMUSG00000019831	Wasf1	3.77502
ENSMUSG00000019832	Rab32	1.27315
ENSMUSG00000019837	Gtf3c6	0.281349
ENSMUSG00000019838	Slc16a10	4.04381
ENSMUSG00000019841	Rev3l	4.41252
ENSMUSG00000019842	Traf3ip2	1.63178
ENSMUSG00000019843	Fyn	1.78706
ENSMUSG00000019845	Tube1	1.4246
ENSMUSG00000019846	Lama4	2.1858
ENSMUSG00000019849	Prep	0.638987
ENSMUSG00000019851	Perp	0.716488
ENSMUSG00000019854	Reps1	1.68644
ENSMUSG00000019857	Asf1a	1.00502
ENSMUSG00000019861	Gopc	1.50553
ENSMUSG00000019863	Qrsl1	0.902341
ENSMUSG00000019864	Rtn4ip1	1.08543
ENSMUSG00000019866	Aim1	1.16861
ENSMUSG00000019868	Vta1	1.5145
ENSMUSG00000019872	Smpdl3a	0.980348
ENSMUSG00000019873	Reep3	1.82871
ENSMUSG00000019874	Fabp7	0.492128
ENSMUSG00000019876	Pkib	1.42469
ENSMUSG00000019877	Serinc1	0.931214
ENSMUSG00000019878	Hsf2	1.5553
ENSMUSG00000019880	Rspo3	1.53474
ENSMUSG00000019883	Echdc1	0.796541
ENSMUSG00000019889	Ptprk	0.858754
ENSMUSG00000019891	Dcbld1	8.70407
ENSMUSG00000019897	Ccdc59	0.617948
ENSMUSG00000019906	Lin7a	1.21547
ENSMUSG00000019907	Ppp1r12a	1.63765
ENSMUSG00000019916	P4ha1	6.22831
ENSMUSG00000019917	43353	2.58313
ENSMUSG00000019920	Lims1	3.6897
ENSMUSG00000019923	Zwint	1.02551
ENSMUSG00000019927	Ube2d1	2.18745
ENSMUSG00000019929	Dcn	0.562544
ENSMUSG00000019935	Slc17a8	0.868831
ENSMUSG00000019942	Cdk1	0.592266
ENSMUSG00000019943	Atp2b1	2.00564
ENSMUSG00000019944	Rhobtb1	2.06488
ENSMUSG00000019945	1700040L02Rik	0.695929
ENSMUSG00000019947	Arid5b	1.62174
ENSMUSG00000019948	Actr6	3.75792
ENSMUSG00000019951	Uhrf1bp1l	2.1126
ENSMUSG00000019952	Poc1b	0.835224
ENSMUSG00000019960	Dusp6	0.950864
ENSMUSG00000019961	Tmpo	2.16349
ENSMUSG00000019966	Kitl	4.44053
ENSMUSG00000019969	Psen1	0.82828
ENSMUSG00000019970	Sgk1	3.17251
ENSMUSG00000019971	Cep290	0.879852
ENSMUSG00000019975	Ikbip	1.19186
ENSMUSG00000019977	Hbs1l	1.39235
ENSMUSG00000019978	Epb4.1l2	1.73573
ENSMUSG00000019979	Apaf1	3.86276
ENSMUSG00000019984	Med23	2.14473
ENSMUSG00000019987	Arg1	0.725591
ENSMUSG00000019988	Nedd1	4.56001
ENSMUSG00000019989	Enpp3	1.03363
ENSMUSG00000019996	Map7	2.12022
ENSMUSG00000019997	Ctgf	2.56053
ENSMUSG00000019998	Stx7	2.3202
ENSMUSG00000020003	Pex7	0.627845
ENSMUSG00000020009	Ifngr1	1.88526
ENSMUSG00000020010	Vnn3	0.443688
ENSMUSG00000020015	Cdk17	4.01124
ENSMUSG00000020017	Hal	0.7288
ENSMUSG00000020018	Snrpf	0.046156
ENSMUSG00000020019	Ntn4	0.844113
ENSMUSG00000020021	Fgd6	2.24179
ENSMUSG00000020022	Ndufa12	0.304213
ENSMUSG00000020023	Tmcc3	2.17293
ENSMUSG00000020024	Cep83	1.2086
ENSMUSG00000020027	Socs2	2.17203
ENSMUSG00000020029	Nudt4	1.22192
ENSMUSG00000020032	Nuak1	2.16315
ENSMUSG00000020034	Tcp11l2	1.81572
ENSMUSG00000020037	Rfx4	1.3978
ENSMUSG00000020038	Cry1	1.31016
ENSMUSG00000020044	Timp3	0.834262
ENSMUSG00000020048	Hsp90b1	0.596334
ENSMUSG00000020051	Pah	0.55414
ENSMUSG00000020053	Igf1	1.93901
ENSMUSG00000020056	Ccdc53	0.479162
ENSMUSG00000020057	Dram1	1.78984
ENSMUSG00000020059	Sycp3	4.57629
ENSMUSG00000020063	Sirt1	3.43519
ENSMUSG00000020064	Herc4	1.48064
ENSMUSG00000020069	Hnrnph3	2.24187
ENSMUSG00000020070	Rufy2	2.013
ENSMUSG00000020072	Pbld2	0.919919
ENSMUSG00000020074	Ccar1	2.87085
ENSMUSG00000020075	Ddx21	0.730096
ENSMUSG00000020076	Ddx50	1.40591
ENSMUSG00000020077	Srgn	0.218298
ENSMUSG00000020078	Vps26a	0.768623
ENSMUSG00000020079	Supv3l1	0.710727
ENSMUSG00000020085	Aifm2	1.22341
ENSMUSG00000020086	H2afy2	2.34454
ENSMUSG00000020087	Tysnd1	0.570971
ENSMUSG00000020088	Sar1a	2.84742
ENSMUSG00000020089	Ppa1	0.290556
ENSMUSG00000020091	Eif4ebp2	1.47821
ENSMUSG00000020092	Pald1	1.95736
ENSMUSG00000020097	Sgpl1	2.98283
ENSMUSG00000020098	Pcbd1	0.757922
ENSMUSG00000020099	Unc5b	2.31448
ENSMUSG00000020100	Slc29a3	8.48326
ENSMUSG00000020101	4632428N05Rik	2.01997
ENSMUSG00000020102	Slc16a7	0.422186
ENSMUSG00000020105	Lrig3	5.40143
ENSMUSG00000020107	Anapc16	0.329784
ENSMUSG00000020108	Ddit4	5.99683
ENSMUSG00000020109	Dnajb12	0.866053
ENSMUSG00000020111	Micu1	0.633832
ENSMUSG00000020114	Cand1	1.43839
ENSMUSG00000020115	Tbk1	1.57771
ENSMUSG00000020116	Pno1	0.397263
ENSMUSG00000020120	Plek	1.88422
ENSMUSG00000020122	Egfr	1.45883
ENSMUSG00000020123	Avpr1a	0.533343
ENSMUSG00000020124	Usp15	1.84082
ENSMUSG00000020128	Vps54	2.31566
ENSMUSG00000020130	Tbc1d15	0.990414
ENSMUSG00000020131	Pcsk4	3.64757
ENSMUSG00000020132	Rab21	0.563437
ENSMUSG00000020133	2310011J03Rik	1.40488
ENSMUSG00000020134	Peli1	1.82613
ENSMUSG00000020137	Thap2	0.827108
ENSMUSG00000020140	Lgr5	1.54388
ENSMUSG00000020142	Slc1a4	0.923989
ENSMUSG00000020143	Dock2	1.81091
ENSMUSG00000020149	Rab1	3.25716
ENSMUSG00000020150	Gamt	0.457449
ENSMUSG00000020152	Actr2	0.83095
ENSMUSG00000020153	Ndufs7	1.12414
ENSMUSG00000020154	Ptprb	2.86889
ENSMUSG00000020156	Mum1	1.82386
ENSMUSG00000020160	Meis1	1.94777
ENSMUSG00000020163	Uqcr11	0.0998486
ENSMUSG00000020166	Cnot2	1.1632
ENSMUSG00000020167	Tcf3	2.49766
ENSMUSG00000020170	Frs2	2.33022
ENSMUSG00000020171	Yeats4	1.31377
ENSMUSG00000020173	Cobl	1.00222
ENSMUSG00000020175	Rab36	1.82323
ENSMUSG00000020176	Grb10	3.60574
ENSMUSG00000020180	Snrpd3	0.211755
ENSMUSG00000020182	Ddc	2.17045
ENSMUSG00000020183	Cpm	2.59024
ENSMUSG00000020184	Mdm2	2.9443
ENSMUSG00000020186	Csrp2	0.60277
ENSMUSG00000020189	Osbpl8	4.42749
ENSMUSG00000020190	Mknk2	3.18298
ENSMUSG00000020196	Cabin1	1.17977
ENSMUSG00000020198	Ap3d1	2.53344
ENSMUSG00000020205	Phlda1	2.51286
ENSMUSG00000020211	Sf3a2	2.54475
ENSMUSG00000020212	Mdm1	1.8934
ENSMUSG00000020219	Timm13	0.213165
ENSMUSG00000020220	Vps13d	0.825267
ENSMUSG00000020224	Llph	0.418678
ENSMUSG00000020225	Tmbim4	1.28168
ENSMUSG00000020228	Helb	5.09602
ENSMUSG00000020230	Prmt2	1.47507
ENSMUSG00000020231	Dip2a	1.68982
ENSMUSG00000020232	Hmg20b	2.29041
ENSMUSG00000020235	Fzr1	1.93526
ENSMUSG00000020238	Ncln	2.88132
ENSMUSG00000020241	Col6a2	2.41294
ENSMUSG00000020246	Hcfc2	4.32396
ENSMUSG00000020248	Nfyb	1.04727
ENSMUSG00000020250	Txnrd1	1.28712
ENSMUSG00000020253	Ppm1m	1.45508
ENSMUSG00000020255	D10Wsu102e	0.978204
ENSMUSG00000020257	Wdr82	2.49176
ENSMUSG00000020258	Glyctk	1.36163
ENSMUSG00000020260	Pofut2	0.892164
ENSMUSG00000020261	Slc36a1	4.82088
ENSMUSG00000020262	Adarb1	1.97164
ENSMUSG00000020263	Appl2	1.70134
ENSMUSG00000020265	Sumo3	0.972145
ENSMUSG00000020267	Hint1	0.252702
ENSMUSG00000020268	Lyrm7	0.507275
ENSMUSG00000020271	Fbxw11	1.47476
ENSMUSG00000020272	Stk10	1.45583
ENSMUSG00000020273	Papolg	1.17755
ENSMUSG00000020275	Rel	6.17625
ENSMUSG00000020277	Pfkl	1.17526
ENSMUSG00000020280	Pus10	1.99007
ENSMUSG00000020282	Rhbdf1	4.20457
ENSMUSG00000020283	Pex13	0.733664
ENSMUSG00000020284	1810043G02Rik	0.961149
ENSMUSG00000020287	Mpg	1.32296
ENSMUSG00000020288	Ahsa2	2.23234
ENSMUSG00000020289	Nprl3	2.85544
ENSMUSG00000020290	Xpo1	1.74563
ENSMUSG00000020300	Cpeb4	1.39646
ENSMUSG00000020305	Asb3	1.77189
ENSMUSG00000020307	Cdc34	2.36108
ENSMUSG00000020308	Tpgs1	0.535262
ENSMUSG00000020309	Chac2	0.3942
ENSMUSG00000020311	Erlec1	0.566481
ENSMUSG00000020315	Sptbn1	1.71019
ENSMUSG00000020319	Wdpcp	0.737791
ENSMUSG00000020321	Mdh1	0.539329
ENSMUSG00000020326	Ccng1	2.48665
ENSMUSG00000020328	Nudcd2	0.428849
ENSMUSG00000020329	Polrmt	2.49294
ENSMUSG00000020334	Slc22a4	1.13916
ENSMUSG00000020335	Zfp354b	3.23107
ENSMUSG00000020346	Mgat1	1.08302
ENSMUSG00000020349	Ppp2ca	0.500422
ENSMUSG00000020357	Flt4	1.5362
ENSMUSG00000020358	Hnrnpab	0.297413
ENSMUSG00000020359	Phykpl	1.32747
ENSMUSG00000020361	Hspa4	0.772898
ENSMUSG00000020362	Cnot6	2.98316
ENSMUSG00000020364	Zfp354a	2.76277
ENSMUSG00000020366	Mapk9	1.20642
ENSMUSG00000020368	Canx	0.97925
ENSMUSG00000020372	Gnb2l1	0.315403
ENSMUSG00000020375	Rufy1	1.08929
ENSMUSG00000020376	Rnf130	0.654761
ENSMUSG00000020377	Ltc4s	0.921752
ENSMUSG00000020380	Rad50	1.38283
ENSMUSG00000020381	3010026O09Rik	1.75278
ENSMUSG00000020385	Clk4	6.73455
ENSMUSG00000020386	Sar1b	0.814403
ENSMUSG00000020387	Jade2	3.03853
ENSMUSG00000020388	Pdlim4	0.658992
ENSMUSG00000020390	Ube2b	1.2662
ENSMUSG00000020392	Cdkn2aipnl	1.68622
ENSMUSG00000020393	Kremen1	1.75228
ENSMUSG00000020397	Med7	0.64145
ENSMUSG00000020400	Tnip1	0.738042
ENSMUSG00000020402	Vdac1	0.507792
ENSMUSG00000020407	Upp1	1.66631
ENSMUSG00000020409	Slu7	0.635397
ENSMUSG00000020412	Ascc2	1.36224
ENSMUSG00000020413	Hus1	5.70681
ENSMUSG00000020415	Pttg1	0.825981
ENSMUSG00000020422	Tns3	2.34905
ENSMUSG00000020423	Btg2	9.02448
ENSMUSG00000020424	Gatsl3	2.78673
ENSMUSG00000020427	Igfbp3	1.35949
ENSMUSG00000020429	Igfbp1	0.770155
ENSMUSG00000020430	Pes1	0.713789
ENSMUSG00000020432	Tcn2	0.437762
ENSMUSG00000020437	Myo1g	5.99634
ENSMUSG00000020439	Smtn	1.30678
ENSMUSG00000020440	Arf5	0.638712
ENSMUSG00000020441	2310033P09Rik	0.807903
ENSMUSG00000020444	Guk1	0.448599
ENSMUSG00000020448	Rnf185	1.46582
ENSMUSG00000020451	Limk2	3.03926
ENSMUSG00000020453	Patz1	2.51668
ENSMUSG00000020454	Eif4enif1	2.8156
ENSMUSG00000020455	Trim11	2.07499
ENSMUSG00000020456	Ogdh	0.73774
ENSMUSG00000020457	Drg1	0.604215
ENSMUSG00000020458	Rtn4	0.63915
ENSMUSG00000020459	Mtif2	1.5997
ENSMUSG00000020460	Rps27a	0.362091
ENSMUSG00000020462	Cfap36	0.31523
ENSMUSG00000020463	Smek2	1.80153
ENSMUSG00000020464	Pnpt1	1.71478
ENSMUSG00000020467	Efemp1	0.653586
ENSMUSG00000020471	Pold2	7.94606
ENSMUSG00000020472	Zkscan17	1.97424
ENSMUSG00000020474	Polm	6.35488
ENSMUSG00000020476	Dbnl	1.43781
ENSMUSG00000020477	Mrps24	0.431886
ENSMUSG00000020482	Ccdc117	1.77809
ENSMUSG00000020483	Dynll2	0.692832
ENSMUSG00000020484	Xbp1	1.19679
ENSMUSG00000020485	Supt4a	0.236661
ENSMUSG00000020486	43347	1.3097
ENSMUSG00000020491	2810021J22Rik	1.81219
ENSMUSG00000020492	Ska2	2.48875
ENSMUSG00000020493	Prr11	2.08769
ENSMUSG00000020495	Smg8	1.11868
ENSMUSG00000020496	Rnf187	0.642451
ENSMUSG00000020513	Tubd1	1.83105
ENSMUSG00000020514	Mrpl22	1.04428
ENSMUSG00000020515	Cnot8	0.96146
ENSMUSG00000020516	Rps6kb1	2.28752
ENSMUSG00000020519	Sap30l	0.815089
ENSMUSG00000020520	Galnt10	0.901877
ENSMUSG00000020521	Rnft1	1.39385
ENSMUSG00000020522	Mfap3	2.69464
ENSMUSG00000020523	Fam114a2	1.34509
ENSMUSG00000020525	Ppm1d	1.62185
ENSMUSG00000020526	Znhit3	0.789192
ENSMUSG00000020527	Myo19	2.71274
ENSMUSG00000020528	Prpsap2	1.03502
ENSMUSG00000020530	Ggnbp2	1.27732
ENSMUSG00000020532	Acaca	1.11799
ENSMUSG00000020534	Shmt1	0.477847
ENSMUSG00000020536	Llgl1	3.52869
ENSMUSG00000020537	Drg2	0.661263
ENSMUSG00000020538	Srebf1	2.776
ENSMUSG00000020541	Tom1l1	2.82165
ENSMUSG00000020544	Cox11	0.496634
ENSMUSG00000020547	Bzw2	1.04897
ENSMUSG00000020549	Elac2	1.21257
ENSMUSG00000020553	Pctp	1.64573
ENSMUSG00000020561	Twistnb	1.19031
ENSMUSG00000020564	Atxn7l1	1.5858
ENSMUSG00000020570	Sypl	1.05912
ENSMUSG00000020571	Pdia6	0.755973
ENSMUSG00000020572	Nampt	1.63942
ENSMUSG00000020576	Nbas	0.983838
ENSMUSG00000020580	Rock2	2.18953
ENSMUSG00000020585	Laptm4a	0.584854
ENSMUSG00000020589	Fam49a	3.73992
ENSMUSG00000020590	Snx13	3.80284
ENSMUSG00000020592	Sdc1	0.700217
ENSMUSG00000020593	Lpin1	1.1962
ENSMUSG00000020594	Pum2	2.07029
ENSMUSG00000020601	Trib2	5.13171
ENSMUSG00000020604	Arsg	1.65376
ENSMUSG00000020605	Hs1bp3	1.62107
ENSMUSG00000020607	Fam84a	6.05479
ENSMUSG00000020608	Smc6	1.23657
ENSMUSG00000020609	Apob	2.66836
ENSMUSG00000020610	Amz2	1.59807
ENSMUSG00000020611	Gna13	3.89089
ENSMUSG00000020612	Prkar1a	2.3066
ENSMUSG00000020614	Fam20a	0.712353
ENSMUSG00000020620	Abca8b	0.672877
ENSMUSG00000020621	Rdh14	1.04636
ENSMUSG00000020623	Map2k6	0.976815
ENSMUSG00000020628	Trappc12	0.93497
ENSMUSG00000020629	Adi1	0.433936
ENSMUSG00000020630	Rnaseh1	0.996821
ENSMUSG00000020633	Dcdc2c	2.24591
ENSMUSG00000020634	Ubxn2a	0.541477
ENSMUSG00000020638	Cmpk2	1.69432
ENSMUSG00000020640	Itsn2	2.66523
ENSMUSG00000020641	Rsad2	2.05995
ENSMUSG00000020642	Rnf144a	2.22532
ENSMUSG00000020644	Id2	1.25737
ENSMUSG00000020647	Ncoa1	1.3015
ENSMUSG00000020648	Dus4l	1.68422
ENSMUSG00000020649	Rrm2	0.670391
ENSMUSG00000020650	Bcap29	1.33138
ENSMUSG00000020652	Cenpo	0.995847
ENSMUSG00000020653	Klf11	2.46887
ENSMUSG00000020659	Cbll1	3.6731
ENSMUSG00000020661	Dnmt3a	3.88003
ENSMUSG00000020664	Dld	0.729339
ENSMUSG00000020668	Kif3c	2.11114
ENSMUSG00000020669	Sh3yl1	0.729972
ENSMUSG00000020671	Rab10	0.974493
ENSMUSG00000020672	Sntg2	1.02858
ENSMUSG00000020674	Pxdn	5.04552
ENSMUSG00000020677	Ddx52	1.29563
ENSMUSG00000020679	Hnf1b	1.62676
ENSMUSG00000020680	Taf15	0.962359
ENSMUSG00000020687	Cdc27	1.8535
ENSMUSG00000020689	Itgb3	3.94904
ENSMUSG00000020691	Mettl2	1.93581
ENSMUSG00000020692	Nle1	3.07114
ENSMUSG00000020694	Tlk2	1.2216
ENSMUSG00000020696	Rffl	3.14662
ENSMUSG00000020697	Lig3	1.84327
ENSMUSG00000020700	Map3k3	1.22612
ENSMUSG00000020701	Tmem132e	1.23989
ENSMUSG00000020705	Ddx42	1.25437
ENSMUSG00000020706	Ftsj3	2.13419
ENSMUSG00000020707	Rnf135	0.926318
ENSMUSG00000020708	Psmc5	0.524933
ENSMUSG00000020709	Adap2	1.21796
ENSMUSG00000020715	Ern1	2.34148
ENSMUSG00000020716	Nf1	1.94989
ENSMUSG00000020717	Pecam1	0.86991
ENSMUSG00000020718	Polg2	1.60934
ENSMUSG00000020719	Ddx5	1.99956
ENSMUSG00000020720	Psmd12	1.0502
ENSMUSG00000020721	Helz	3.4715
ENSMUSG00000020733	Slc9a3r1	1.78748
ENSMUSG00000020736	Nt5c	0.315505
ENSMUSG00000020737	Hn1	0.62472
ENSMUSG00000020738	Sumo2	0.644735
ENSMUSG00000020739	Nup85	1.35888
ENSMUSG00000020740	Gga3	8.36845
ENSMUSG00000020741	Cluh	1.60682
ENSMUSG00000020743	Mif4gd	2.10244
ENSMUSG00000020744	Slc25a19	1.72081
ENSMUSG00000020745	Pafah1b1	2.0687
ENSMUSG00000020747	2310067B10Rik	3.20188
ENSMUSG00000020752	Recql5	2.14856
ENSMUSG00000020755	Sap30bp	0.710575
ENSMUSG00000020766	Galk1	0.646503
ENSMUSG00000020770	Unk	4.38889
ENSMUSG00000020773	Trim47	2.57103
ENSMUSG00000020774	Aspa	1.66241
ENSMUSG00000020775	Mrpl38	0.704105
ENSMUSG00000020776	Fbf1	2.50404
ENSMUSG00000020777	Acox1	0.706477
ENSMUSG00000020778	Ten1	0.370443
ENSMUSG00000020780	Srp68	1.12471
ENSMUSG00000020781	Tsen54	2.10735
ENSMUSG00000020782	Llgl2	2.63658
ENSMUSG00000020783	1200014J11Rik	1.31987
ENSMUSG00000020790	Ankfy1	4.1116
ENSMUSG00000020792	Exoc7	0.584224
ENSMUSG00000020794	Ube2g1	1.75076
ENSMUSG00000020801	Med31	0.425189
ENSMUSG00000020802	Ube2o	2.096
ENSMUSG00000020803	Txndc17	0.237732
ENSMUSG00000020805	Slc13a5	0.940068
ENSMUSG00000020806	Rhbdf2	4.85134
ENSMUSG00000020807	4933427D14Rik	1.79649
ENSMUSG00000020810	Cygb	0.750609
ENSMUSG00000020812	1810032O08Rik	1.52257
ENSMUSG00000020814	Mxra7	0.937326
ENSMUSG00000020817	Rabep1	1.20877
ENSMUSG00000020818	Mfsd11	7.82787
ENSMUSG00000020821	Kif1c	0.900816
ENSMUSG00000020823	Sec14l1	3.2238
ENSMUSG00000020827	Mink1	4.90956
ENSMUSG00000020828	Pld2	3.09243
ENSMUSG00000020829	Slc46a1	1.73296
ENSMUSG00000020830	Vmo1	0.331327
ENSMUSG00000020831	0610010K14Rik	0.679171
ENSMUSG00000020832	Eral1	1.17209
ENSMUSG00000020834	Dhrs13	0.676265
ENSMUSG00000020840	Blmh	1.34755
ENSMUSG00000020841	Cpd	2.56385
ENSMUSG00000020843	Timm22	0.373256
ENSMUSG00000020844	Nxn	0.550976
ENSMUSG00000020846	Fam101b	1.04509
ENSMUSG00000020847	Rph3al	1.51024
ENSMUSG00000020849	Ywhae	0.452954
ENSMUSG00000020850	Prpf8	1.70144
ENSMUSG00000020857	Nme2	0.319609
ENSMUSG00000020859	Spag9	2.42876
ENSMUSG00000020863	Luc7l3	1.21144
ENSMUSG00000020864	Ankrd40	0.891508
ENSMUSG00000020865	Abcc3	1.29461
ENSMUSG00000020868	Xylt2	2.27147
ENSMUSG00000020869	Lrrc59	0.805716
ENSMUSG00000020870	Cdc34-ps	3.6956
ENSMUSG00000020873	Slc35b1	0.84071
ENSMUSG00000020876	Snx11	1.38334
ENSMUSG00000020877	Scrn2	0.405863
ENSMUSG00000020878	Lrrc46	1.46332
ENSMUSG00000020883	Fbxl20	3.63055
ENSMUSG00000020884	Asgr1	0.686389
ENSMUSG00000020888	Dvl2	0.716436
ENSMUSG00000020889	Nr1d1	2.55204
ENSMUSG00000020893	Per1	6.42305
ENSMUSG00000020894	Vamp2	0.927844
ENSMUSG00000020895	Tmem107	0.678012
ENSMUSG00000020898	Ctc1	3.29288
ENSMUSG00000020899	Pfas	1.98698
ENSMUSG00000020900	Myh10	0.783349
ENSMUSG00000020902	Ntn1	1.20377
ENSMUSG00000020903	Stx8	0.258172
ENSMUSG00000020910	Adprm	0.806384
ENSMUSG00000020911	Krt19	1.76065
ENSMUSG00000020917	Acly	1.09298
ENSMUSG00000020918	Kat2a	2.31775
ENSMUSG00000020919	Stat5b	1.24412
[truncated: 9,580 more rows]
